# Supplementary material for: Long-distance kinship in megalithic Europe
Source: Research Square preprint supplement (doi:10.21203/rs.3.rs-6464608/v1), 2025-05-07
Supplement: Supplementary file 1 [file 3925875ee0dc98d2be4d088f.xlsx]

## Sheet: Sup Table 1 - Summary
Supplementary Table 1. Sample information
Basic sample information					Summary of mapping statistics (MAPQ>30)							Genotyping	Sex assignment					Uniparental markers		aDNA authentication (DamageProfiler)						X-chromosome contamination (ANGSD)		mtDNA contamination (Schmutzi)
Laboratory ID	Skeletal code	Skeletal element	Site	Publication	Total number of reads (whole genome)	Mean read length (whole genome)	Mean depth (whole genome)	Mean depth (MT)	Number of reads mapped to MT	Number of reads mapped to X	Number of reads mapped to Y	SNPs covered from 1240K panel	Rx (Mittnik et al 2016)	Rx 95% CI	Ry (Skoglund et al 2013)	Ry 95% CI	Assigned sex	chrY haplogroup (Yhaplo)	chrMT haplogroup (Haplogrep)	Damage 1st base (5’)	Damage 2nd base (5’)	Damage 3rd base (5’)	Damage 1st base (3’)	Damage 2nd base (3’)	Damage 3rd base (3’)	Method2 contamination	Method2 SE	Contamination (no pred)	Estimate low (no pred)	Estimate high (no pred)
KH180054	AD52	petrous bone	Altendorf	daSilvaGenomeBiology2025	34421546	63.082	0.699279	23.4816	6790	1066593	7696	427349	0.847481	0.79-0.905	0.0072	0.007-0.0074	F	..	H3c	0.0926946	0.012047	0.00785868	0.0932614	0.0121584	0.00811358			0.01	0	0.02
KH180056	AD105	petrous bone	Altendorf	this study	11427847	57.6007	0.212405	9.17835	2903	315216	2682	168772	0.804874	0.7414-0.8684	0.0084	0.008-0.0088	F	..	H1ae	0.0810033	0.0124014	0.00814536	0.0802444	0.0129316	0.00828586			0.01	0	0.02
KH180057	AD11	petrous bone	Altendorf	daSilvaGenomeBiology2025	1678925	58.8544	0.031856	1.56346	476	31777	3070	44146	0.399293	0.3655-0.4331	0.0881	0.0852-0.091	M	I2a1a1a	..	0.0847393	0.0150512	0.0101446	0.0837228	0.0148458	0.0101461	0	0	0.01	0	0.02
KH180058	AD62	petrous bone	Altendorf	this study	38195773	63.6165	0.782882	59.2619	17265	647382	66979	529065	0.432975	0.4068-0.4591	0.0938	0.0932-0.0944	M	I2c1	H17	0.0773542	0.0110454	0.00799016	0.0777497	0.0111846	0.00811278	0.006019	0.00357697	0.01	0	0.02
KH180059	AD172	petrous bone	Altendorf	daSilvaGenomeBiology2025	5343505	59.1911	0.102024	6.84718	2100	85613	8779	109834	0.432217	0.4049-0.4596	0.093	0.0912-0.0948	M	I	U5b1d2	0.106225	0.0156335	0.010159	0.107058	0.0155387	0.0100505	-0.005994	0.0068806	0.01	0	0.02
KH180131	AD117	petrous bone	Altendorf	daSilvaGenomeBiology2025	17305247	71.7291	0.40068	17.5066	4656	318420	32577	344583	0.455567	0.431-0.4802	0.0928	0.0918-0.0938	M	I2a1a1a	H1	0.0604567	0.0098741	0.00640566	0.0600528	0.00992007	0.00651601	0.01097	0.00725981	0.01	0	0.02
KH180135_KH180136	AD140	petrous bone & tooth	Altendorf	daSilvaGenomeBiology2025	40364290	58.3079	0.759764	68.0164	20247	631330	63552	505841	0.459052	0.4356-0.4825	0.0915	0.0909-0.0921	M	I2c1a1	V10	0.172633	0.0174489	0.0106996	0.170512	0.0175405	0.0107204	0.009847	0.00535642	0.01	0	0.02
KH180137_KH182329	AD119	petrous bone	Altendorf	daSilvaGenomeBiology2025	11787410	57.955	0.220622	15.6254	4650	173828	17794	183600	0.451095	0.4266-0.4756	0.0929	0.0915-0.0943	M	I2c1	W1	0.115515	0.0137046	0.00843523	0.114597	0.0137634	0.00863361	-0.004484	0.00340107	0.02	0.01	0.03
KH180139_KH180140	AD79	petrous bone & tooth	Altendorf	this study	17772093	67.7756	0.387934	29.4186	7690	793439	5562	392989	0.874061	0.8217-0.9264	0.007	0.0068-0.0072	F	..	J1c3	0.128447	0.0117446	0.00764866	0.127936	0.0118083	0.00763799			0.01	0	0.02
KH180149	AD188	petrous bone	Altendorf	daSilvaGenomeBiology2025	2256332	52.9401	0.038554	2.47034	840	41024	4059	55878	0.407541	0.3771-0.438	0.09	0.0875-0.0925	M	I	H1	0.106321	0.0183873	0.0115715	0.105248	0.0185873	0.0117598	-0.009394	0.0105745	0.02	0	0.05
KH180150_KH180151	AD165	petrous bone & tooth	Altendorf	daSilvaGenomeBiology2025	32081451	62.9143	0.650985	42.26	12290	521412	53281	460713	0.423972	0.3967-0.4513	0.0927	0.0919-0.0935	M	I2c1a1	T2c1d	0.101752	0.0110847	0.00696448	0.100532	0.0112595	0.00698083	0.001301	0.00292333	0.01	0	0.02
KH180152	AD178	petrous bone	Altendorf	daSilvaGenomeBiology2025	15836203	57.5632	0.294748	14.2749	4461	464656	3508	247350	0.851342	0.7994-0.9033	0.0075	0.0073-0.0077	F	..	K1a	0.0930741	0.0123416	0.00720411	0.0916548	0.012425	0.00725209			0.01	0	0.02
KH180153_KH180154	AD181	petrous bone & tooth	Altendorf	daSilvaGenomeBiology2025	10126154	67.6551	0.220853	12.5703	3568	426320	2957	243945	0.82343	0.765-0.8818	0.0069	0.0067-0.0071	F	..	U5b2a1a	0.063413	0.0108352	0.00686468	0.0637572	0.0109643	0.00704123			0.02	0.01	0.03
KH180158	AD15	petrous bone	Altendorf	daSilvaGenomeBiology2025	847470	55.7555	0.015287	0.472147	152	27499	297	22919	0.805764	0.7484-0.8632	0.0107	0.0095-0.0119	F	..	..	0.0685472	0.0196145	0.0129525	0.0687818	0.018881	0.0125616
KH180159	AD198	petrous bone	Altendorf	daSilvaGenomeBiology2025	46715008	57.8171	0.872344	42.0636	13304	715416	71921	531191	0.425294	0.3989-0.4517	0.0913	0.0907-0.0919	M	I2c1a1	H3	0.0889468	0.012846	0.00739261	0.0886952	0.0130148	0.00744029	0.005644	0.00359803	0.01	0	0.02
KH180160_KH180161	AD186	petrous bone & tooth	Altendorf	daSilvaGenomeBiology2025	1166696	59.4934	0.022423	1.54004	448	25115	2377	41743	0.411802	0.3782-0.4454	0.0865	0.0832-0.0898	M	I2c	..	0.0546269	0.0179507	0.0140123	0.0546124	0.0180044	0.0134951	0	0
KH180162	AD162	petrous bone	Altendorf	daSilvaGenomeBiology2025	3931767	55.7861	0.070754	3.7814	1131	186952	1621	96241	0.940356	0.8976-0.9831	0.0086	0.0082-0.009	F	..	T2c1d	0.0298763	0.0129407	0.00656643	0.0294025	0.0129938	0.00689943			0.01	0	0.02
KH180163	AD167	petrous bone	Altendorf	this study	1292681	57.8788	0.024224	1.43443	397	31032	3004	34181	0.460555	0.4388-0.4823	0.0883	0.0854-0.0912	M	I	W1	0.0431535	0.0125178	0.00808013	0.0399407	0.0118848	0.00779691	0	0	0.01	0	0.04
KH180820_KH180821	AD51	petrous bone & tooth	Altendorf	this study	1622108	43.5308	0.02286	1.89698	657	39443	3686	35494	0.470433	0.4498-0.491	0.0855	0.083-0.088	M	..	H1t	0.0905515	0.0168559	0.0103848	0.0913991	0.0163923	0.0103715	0	0	0.01	0	0.02
KH180827_KH180828	AD107	petrous bone & tooth	Altendorf	this study	2582333	44.551	0.037126	2.30654	842	113590	945	54157	0.856564	0.8135-0.8996	0.0083	0.0077-0.0089	F	..	H1ae	0.100669	0.0126629	0.00732585	0.10031	0.0128583	0.00754512			0.02	0.01	0.03
KH180831_KH180832	AD115	petrous bone & tooth	Altendorf	this study	1700965	54.9795	0.030261	2.54548	750	40177	3958	42920	0.451948	0.4298-0.4741	0.0897	0.087-0.0924	M	I	J1c3	0.068379	0.0140892	0.00945433	0.0673143	0.0138433	0.00973633	0	0	0.01	0	0.02
KH180833	AD31	petrous bone	Altendorf	this study	1148728	52.1371	0.019371	1.18281	375	49410	482	27416	0.832613	0.7828-0.8824	0.0097	0.0089-0.0105	F	..	U5a2b3	0.0686696	0.0134097	0.00889026	0.069869	0.0132415	0.00855839			0.01	0	0.02
KH180858	AD160	petrous bone	Altendorf	this study	1200100	62.4598	0.024261	2.55628	645	28287	2835	32948	0.449999	0.4263-0.4737	0.0911	0.088-0.0942	M	I2c1a1	V23	0.0598403	0.0149957	0.0100839	0.0602549	0.0148508	0.0104938	0	0	0.02	0.01	0.03
KH180873_KH180874	AD57	petrous bone & tooth	Altendorf	this study	1645014	58.5024	0.031182	2.24292	620	37880	3887	42872	0.4377	0.4122-0.4632	0.0931	0.0904-0.0958	M	..	U5b1f1a	0.0796396	0.0142465	0.00968203	0.0799388	0.0150846	0.0102058	0	0	0.01	0	0.02
KH180875	AD222	petrous bone	Altendorf	this study	1058740	46.3077	0.015828	1.318	479	50241	300	24427	0.942286	0.901-0.9836	0.0059	0.0053-0.0065	F	..	J1c3	0.066385	0.0138315	0.00811816	0.0669413	0.013864	0.00821904			0.01	0	0.02
KH180877	AD36_Z909	petrous bone	Altendorf	this study	1461419	60.586	0.02862	2.49291	693	33677	3510	39574	0.439436	0.4153-0.4636	0.0944	0.0915-0.0973	M	..	J1c1	0.0836834	0.0139777	0.00883016	0.0836393	0.0136834	0.00921389	0	0	0.01	0	0.02
KH180879_KH180880_KH182328	AD114	petrous bone & tooth	Altendorf	this study	5836388	48.1788	0.090836	9.86451	3364	138284	13636	129139	0.456753	0.4364-0.4771	0.0898	0.0884-0.0912	M	I2c1a1	V3a	0.089757	0.0147739	0.00897975	0.0888774	0.0149467	0.00900695	0.086106	0.0624128	0.01	0	0.02
KH180884	AD197	petrous bone	Altendorf	this study	971512	59.3751	0.018661	2.05848	540	22568	2316	26240	0.443263	0.4195-0.467	0.0931	0.0896-0.0966	M	I	H3aj	0.0754165	0.0141666	0.01	0.0759738	0.0138562	0.0103562	0		0.03	0.01	0.05
KH150189_KH150632_KH150636	NT1	petrous bone & tooth	Niedertiefenbach	ImmelCommBio2021	197089456	54.4614	3.46742	236.614	71156	4550000	492869	1179499	0.441797	0.4195-0.4641	0.0977	0.0975-0.0979	M	I2c1a1a	..	0.102569	0.010106	0.00630371	0.100581	0.0101296	0.00627113	0.004747	0.000949066
KH150190	NT21	tooth	Niedertiefenbach	ImmelCommBio2021	4160683	67.0464	0.090149	6.43998	1771	49544	15202	581077	0.315424	0.2926-0.3383	0.2348	0.2315-0.2381	M	I2c1a1	..	0.0575941	0.010323	0.00598978	0.0568163	0.0107131	0.00652189	0.017789	0.0070072
KH150191_KH150417	NT3+NT39	tooth	Niedertiefenbach	ImmelCommBio2021	271666	64.8131	0.005663	1.71676	508	19934	4797	244346	0.361178	0.3344-0.388	0.194	0.1891-0.1989	M	I2a2a2a	T2b	0.0463414	0.013589	0.010108	0.0458753	0.0141555	0.0100283	0.024564	0.0191209	0.01	0	0.02	Age-at-death estimation is given in Immel et al. 2021 (https://doi.org/10.1038/s42003-020-01627-4)
KH150193_KH150286	NT9A+NT9	tooth	Niedertiefenbach	ImmelCommBio2021	5408521	53.0814	0.092752	5.40407	1700	180923	2698	646482	0.638771	0.5925-0.685	0.0147	0.0141-0.0153	F	..	..	0.10376	0.0135533	0.00793071	0.102	0.0137838	0.00808758
KH150195_KH150196_KH150616	NT23+NT123+NT128b	petrous bone	Niedertiefenbach	ImmelCommBio2021	14285577	66.1556	0.304731	26.2815	6936	537075	6085	821337	0.72516	0.677-0.7734	0.0112	0.011-0.0114	F	..	..	0.105846	0.0111167	0.00613089	0.103123	0.0116639	0.00675482
KH150197	NT122.1	tooth	Niedertiefenbach	ImmelCommBio2021	1411959	60.2502	0.027517	2.40093	682	13767	5090	309620	0.283262	0.2621-0.3044	0.2699	0.2636-0.2762	M	I2c1	H2a2	0.0640525	0.0138738	0.00967931	0.0641323	0.014391	0.00949754	0.007046	0.00991493
KH150198	NT186	tooth	Niedertiefenbach	ImmelCommBio2021	1474482	66.4829	0.031657	11.3577	3007	15574	4761	247429	0.331653	0.3071-0.3562	0.2341	0.2282-0.24	M	I2c2	U5b1	0.0433309	0.00998318	0.0068527	0.0421824	0.0103089	0.00735726	0.010801	0.013205	0.01	0	0.04
KH150200	NT136.2	tooth	Niedertiefenbach	ImmelCommBio2021	5656378	66.7069	0.121815	10.7981	2883	141615	1675	583490	0.706903	0.6588-0.755	0.0117	0.0111-0.0123	F	..	V	0.0641858	0.00997346	0.00589185	0.064494	0.0103376	0.00580709			0.01	0	0.02
KH150203_KH150290	NT545+NT121	tooth	Niedertiefenbach	ImmelCommBio2021	1083552	63.4762	0.022195	7.76625	2161	128704	1496	520962	0.680868	0.6274-0.7344	0.0115	0.0109-0.0121	F	..	K1a1b1	0.0765911	0.016267	0.0101273	0.0761576	0.016264	0.0101867			0.01	0	0.02
KH150204_KH150634	NT1001+NT1002	petrous bone	Niedertiefenbach	ImmelCommBio2021	352674860	61.3584	7.00315	450.706	120374	8497005	893313	1227107	0.46513	0.4443-0.486	0.0951	0.0949-0.0953	M	I2c2	..	0.085764	0.00958947	0.00584303	0.0846333	0.00962833	0.00582673	0.004843	0.000684927
KH150208_KH150210	NT26+NT111	tooth	Niedertiefenbach	ImmelCommBio2021	2133570	65.2178	0.04497	16.1718	4664	68649	809	512448	0.615139	0.571-0.6593	0.0116	0.0108-0.0124	F	..	J1c	0.064424	0.0148515	0.00883559	0.0648072	0.0139924	0.00941246
KH150287	NT54	tooth	Niedertiefenbach	ImmelCommBio2021	1765763	61.7213	0.035228	6.5666	1859	20053	5761	319385	0.327554	0.3038-0.3513	0.2232	0.2181-0.2283	M	I	U5a2b4	0.0633982	0.0132472	0.0087832	0.0631403	0.0135529	0.00889532	0.019505	0.015216	0.01	0	0.02
KH150289	NT98	tooth	Niedertiefenbach	ImmelCommBio2021	2038013	57.9618	0.038157	12.7157	3675	23120	6509	326837	0.335735	0.3116-0.3599	0.2197	0.215-0.2244	M	I2c2	V10	0.0609512	0.0111491	0.00684808	0.0604053	0.0113218	0.00712809	0.014683	0.011707	0.02	0.01	0.03
KH150418	NT41+NT45+NT43	tooth	Niedertiefenbach	ImmelCommBio2021	2441214	66.2373	0.052309	2.25119	585	24477	8828	443171	0.300615	0.2791-0.3221	0.2651	0.2604-0.2698	M	I2	..	0.0531181	0.0129921	0.00916574	0.0509459	0.0132941	0.00962162	0.008424	0.00714788
KH150419	NT27	tooth	Niedertiefenbach	ImmelCommBio2021	527926	52.586	0.008984	1.83318	502	12510	235	132444	0.605653	0.5542-0.6572	0.0184	0.016-0.0208	F	..	..	0.0800908	0.0225835	0.0179065	0.078147	0.0227123	0.0166175
KH150422	NT46	tooth	Niedertiefenbach	ImmelCommBio2021	2050493	62.7256	0.041574	3.05257	843	20278	6270	342721	0.32224	0.3005-0.344	0.2362	0.2311-0.2413	M	I	U5b1d2	0.0624365	0.0130915	0.00811742	0.0605333	0.0137459	0.00913015	0.00766	0.00874245
KH150610	NT17	petrous bone	Niedertiefenbach	ImmelCommBio2021	197093191	66.5904	4.24218	537.886	128964	9638013	59451	1185839	0.973791	0.9307-1.0168	0.0061	0.0061-0.0061	F	..	..	0.0751962	0.0103968	0.00667868	0.0737495	0.0105347	0.00663776
KH150612	NT5+NT6.2	petrous bone	Niedertiefenbach	ImmelCommBio2021	267716885	59.9058	5.19027	500.02	135400	6520894	686594	1219272	0.472056	0.4512-0.493	0.0953	0.0951-0.0955	M	I2a2a	..	0.0690923	0.0101901	0.00669935	0.0687398	0.0104013	0.00675113	0.005848	0.000812221
KH150613_KH180043	NT107	petrous bone	Niedertiefenbach	ImmelCommBio2021	175695036	58.319	3.31343	241.728	68017	3993202	432593	1155036	0.433489	0.4095-0.4575	0.0977	0.0975-0.0979	M	I2c2	..	0.0721666	0.00881473	0.00641236	0.0707913	0.00889435	0.00636327	0.005719	0.00106442
KH150614_KH150615	NT142.1	petrous bone	Niedertiefenbach	ImmelCommBio2021	416144233	61.0836	8.21188	416.594	100012	10318533	1054273	1226110	0.484449	0.4627-0.5062	0.0927	0.0925-0.0929	M	I2a1a2a2	..	0.0987745	0.00981445	0.00660762	0.0973947	0.00988495	0.00666132	0.004149	0.000632757
KH150618	NT48	petrous bone	Niedertiefenbach	ImmelCommBio2021	20554469	64.8308	0.43012	30.1224	7997	447112	70907	813896	0.416733	0.3972-0.4363	0.1369	0.1359-0.1379	M	I2c1a1	..	0.0918274	0.0105301	0.00695106	0.0920774	0.011268	0.00746821	0.001841	0.00116204
KH150619	NT42	petrous bone	Niedertiefenbach	ImmelCommBio2021	319682946	57.1108	5.90346	365.788	102378	13881091	107842	1171138	0.842653	0.7916-0.8937	0.0077	0.0077-0.0077	F	..	..	0.101514	0.0114546	0.00716274	0.0990746	0.0116684	0.00709007
KH150620	NT148	petrous bone	Niedertiefenbach	ImmelCommBio2021	870042361	57.1629	16.0681	899.572	224662	21945917	2087691	1230645	0.492373	0.4703-0.5144	0.0869	0.0867-0.0871	M	I2a1a1a	..	0.111403	0.0142217	0.00951753	0.110058	0.014355	0.00954603	0.009524	0.000816856
KH150621	NT50	petrous bone	Niedertiefenbach	ImmelCommBio2021	41261119	53.1965	0.708012	48.0462	15915	254841	26860	324309	0.465444	0.445-0.4859	0.0953	0.0941-0.0965	M	I2c1a1	H3aa	0.116328	0.013997	0.00825812	0.114241	0.0139231	0.00830303			0.01	0	0.02
KH150622	NT130	petrous bone	Niedertiefenbach	ImmelCommBio2021	914378734	60.6419	17.9147	1006.18	244688	43359379	215751	1201335	0.9428	0.8999-0.9857	0.005	0.005-0.005	F	..	..	0.102369	0.0104777	0.00705259	0.101632	0.0106866	0.00716546
KH150623	NT135	petrous bone	Niedertiefenbach	ImmelCommBio2021	856728712	60.6714	16.7872	762.719	188615	21190708	2051365	1230774	0.482477	0.4605-0.5044	0.0883	0.0881-0.0885	M	I2a1a1a	..	0.0951782	0.0129665	0.00845634	0.0943194	0.0131944	0.00851851	0.004977	0.000630297
KH150625	NT83	petrous bone	Niedertiefenbach	ImmelCommBio2021	231344047	52.1088	3.88614	489.53	151678	501558	4372	1147355	0.980965	0.9364-1.0255	0.0086	0.0084-0.0088	F	..	H1	0.0841655	0.0131023	0.00939579	0.0834858	0.0129872	0.00924497			0.02	0.01	0.03
KH150626	NT58	petrous bone	Niedertiefenbach	ImmelCommBio2021	18293015	55.8628	0.329822	17.3727	5284	824086	7182	750067	0.888939	0.8511-0.9268	0.0086	0.0084-0.0088	F	..	..	0.134686	0.0117879	0.00666725	0.134645	0.0120068	0.00683292
KH150627	KI11	petrous bone	Niedertiefenbach	ImmelCommBio2021	286193505	53.3888	4.93534	315.668	95218	12428370	88712	1170822	0.849476	0.8049-0.894	0.0071	0.0071-0.0071	F	..	..	0.123228	0.011669	0.00663786	0.120874	0.0117357	0.0065185
KH150628	NT150.1	petrous bone	Niedertiefenbach	ImmelCommBio2021	4095934	54.2493	0.071716	4.33949	1437	84802	14943	439746	0.396482	0.377-0.416	0.1498	0.1476-0.152	M	I2c	..	0.12685	0.0134298	0.00689758	0.120922	0.0133932	0.00728636	0.000483	0.0029883
KH150629	NT30	petrous bone	Niedertiefenbach	ImmelCommBio2021	267359446	58.5633	5.06625	321.464	89940	6569848	655258	1218473	0.477571	0.4563-0.4988	0.0907	0.0905-0.0909	M	I2c2	..	0.106265	0.0115035	0.00708875	0.104939	0.0114838	0.00721959	0.003943	0.00074906
KH150630	KI12	petrous bone	Niedertiefenbach	ImmelCommBio2021	275379126	55.2785	4.92052	374.313	108598	6880445	675877	1219591	0.488803	0.4666-0.5111	0.0894	0.0892-0.0896	M	I2c1a1	..	0.091971	0.0099939	0.00669457	0.0914099	0.0099208	0.00656065	0.005524	0.00079733
KH150633	KI13	petrous bone	Niedertiefenbach	ImmelCommBio2021	85829372	55.8943	1.55106	144.942	43540	2109884	221547	1073689	0.479396	0.4582-0.5006	0.095	0.0946-0.0954	M	I2c1a1a	..	0.100188	0.0125789	0.00842767	0.0988948	0.0126857	0.00838527	0.009648	0.00186314
KH150635	KI14	petrous bone	Niedertiefenbach	ImmelCommBio2021	437358780	59.1466	8.36133	162.394	32897	21184908	93803	1200523	0.963202	0.9201-1.0063	0.0044	0.0044-0.0044	F	..	..	0.086848	0.0100845	0.00661683	0.0867586	0.0104882	0.00691055
KH150637	NT110	petrous bone	Niedertiefenbach	ImmelCommBio2021	218433088	53.9968	3.81765	184.686	55806	4816984	520975	1154082	0.419195	0.3935-0.4449	0.0976	0.0974-0.0978	M	I2c1a1	..	0.0975947	0.0103257	0.00617446	0.0959309	0.0105749	0.0061277	0.012386	0.00141821
KH150639	NT49	petrous bone	Niedertiefenbach	ImmelCommBio2021	10436422	51.4654	0.173295	11.8325	3882	214243	34599	611532	0.390807	0.3687-0.413	0.139	0.1376-0.1404	M	I2c1a1	..	0.153301	0.0126237	0.00681659	0.149542	0.0127315	0.00699434	0.004109	0.00249366
KH150640	NT49.2	petrous bone	Niedertiefenbach	ImmelCommBio2021	67880220	55.5327	1.21477	63.431	18970	3037366	25293	865581	0.872164	0.8232-0.9211	0.0083	0.0081-0.0085	F	..	..	0.111097	0.010658	0.00587679	0.109474	0.0109932	0.00601884
KH150641	KI15	petrous bone	Niedertiefenbach	ImmelCommBio2021	151708613	50.7421	2.49138	137.244	44010	3275816	362332	1087241	0.410032	0.384-0.4361	0.0996	0.0992-0.1	M	I2c2	..	0.119546	0.0122057	0.00677761	0.116831	0.0122757	0.00671502	0.004001	0.0011723
KH180044	NT136.1	petrous bone	Niedertiefenbach	ImmelCommBio2021	3983999	56.9092	0.073171	5.21142	1531	187171	1623	98161	0.926437	0.8847-0.9681	0.0086	0.0082-0.009	F	..	..	0.117806	0.0119863	0.00739351	0.117857	0.0118567	0.00717957
KH180045	NT146	petrous bone	Niedertiefenbach	ImmelCommBio2021	5060253	53.2912	0.086968	6.81152	2177	239066	1885	117404	0.933894	0.8926-0.9752	0.0078	0.0074-0.0082	F	..	..	0.127392	0.0124443	0.00741935	0.127656	0.0120533	0.00719505
KH180390	RB85	petrous bone	Rimbeck	daSilvaGenomeBiology2025	61231850	72.2671	1.42612	72.3514	19257	1918099	10860	652101	0.81819	0.7583-0.8781	0.0056	0.0054-0.0058	F	..	K1a4a1	0.0538287	0.0110697	0.00759984	0.0533578	0.0112721	0.00769739			0.01	0	0.02
KH180391	RB238	petrous bone	Rimbeck	daSilvaGenomeBiology2025	23326290	58.0211	0.436269	14.1348	4526	599049	3578	249986	0.798667	0.7371-0.8603	0.0059	0.0057-0.0061	F	..	K1a4a1	0.0836394	0.0115702	0.00630959	0.0829071	0.0115927	0.00643008			0.02	0.01	0.03
KH170035_KH210851	S59	petrous bone & tooth	Sorsum	this study	7423951	57.1009	0.137658	13.665	3771	158099	16829	172386	0.405515	0.3772-0.4338	0.0962	0.0948-0.0976	M	I2c1a1	H7d	0.0503619	0.010436	0.00653985	0.0512681	0.0108437	0.00684384	-0.002599	0.00458368	0.01	0	0.02
KH170066	XLVII 11	tooth	Sorsum	this study	10322498	69.6096	0.232042	66.2299	17221	257138	26101	281822	0.481643	0.4601-0.5032	0.0922	0.0912-0.0932	M	I2c1a1	U5b1	0.0359924	0.00929315	0.00717395	0.0373406	0.00905879	0.00724398	0.002747	0.00843738	0.01	0	0.02
KH170073	Ki17	tooth	Sorsum	this study	1538966	60.1193	0.02993	7.06573	2118	37177	3532	41140	0.4651	0.444-0.4862	0.0868	0.0841-0.0895	M	I	U5b1	0.0698919	0.0126237	0.00851501	0.0698796	0.0121897	0.00899197	0	0	0.01	0	0.02
KH210837	1594.01	petrous bone	Sorsum	this study	16617193	58.1654	0.311844	13.9324	4404	296483	31583	151933	0.345063	0.3099-0.3802	0.0963	0.0953-0.0973	M	I	T2c1e	0.0445034	0.0128792	0.00882084	0.0425831	0.0112905	0.00753564	0.006266	0.00698952	0.01	0	0.02
KH210846	1551.01	petrous bone	Sorsum	this study	6935316	49.4224	0.110918	4.43666	1560	120556	12122	78818	0.336265	0.2993-0.3732	0.0914	0.0898-0.093	M	I	..	0.03803	0.00917181	0.00573039	0.0373696	0.00916921	0.00574877	0.011178	0.013017	0.02	0.01	0.03
KH210847	364	petrous bone	Sorsum	this study	2005999	47.52	0.030831	1.00929	366	67059	620	39170	0.655515	0.5837-0.7274	0.0092	0.0084-0.01	F	..	..	0.0331312	0.00843406	0.00568098	0.0380969	0.00974914	0.00662829			0.03	0.01	0.05
KH210848	1268	petrous bone	Sorsum	this study	5702286	48.6066	0.089444	4.91225	1744	101486	10683	90886	0.342066	0.3067-0.3774	0.0952	0.0934-0.097	M	I	X2c1	0.0444721	0.00936449	0.00616996	0.0475019	0.00994452	0.00659447	-0.002752	0	0.02	0.01	0.03
KH210849_KH220441	1644.02	petrous bone & tooth	Sorsum	this study	16532228	51.0592	0.273102	17.9597	6375	306397	32481	217184	0.354814	0.3195-0.3901	0.0958	0.0948-0.0968	M	I2c1a1	U5b1	0.0406478	0.00972287	0.00669159	0.0421196	0.0100457	0.00702246	0.009331	0.0101912	0.01	0	0.02
KH210850_KH210917	1634.02	petrous bone	Sorsum	this study	5877402	48.6151	0.092171	4.76915	1780	213734	2162	96854	0.707906	0.6403-0.7755	0.01	0.0096-0.0104	F	..	J1c5	0.0412663	0.0111355	0.0082779	0.0439318	0.0118578	0.00883214			0.04	0.02	0.06
KH210852	1444	petrous bone	Sorsum	this study	7633797	49.3399	0.121378	8.0921	2941	274880	2866	113088	0.702242	0.6347-0.7698	0.0103	0.0099-0.0107	F	..	U5b1	0.0623223	0.0120705	0.00794261	0.065603	0.0128518	0.0085972			0.01	0	0.02
KH210853	1336.01	petrous bone	Sorsum	this study	6652069	48.1603	0.103336	6.35391	2351	231860	2174	97966	0.679839	0.6089-0.7508	0.0093	0.0089-0.0097	F	..	J1c3	0.047958	0.0103631	0.00702785	0.0525722	0.0113047	0.00772505			0.01	0	0.02
KH210854	427.007	petrous bone	Sorsum	this study	19133448	52.2229	0.321917	15.9826	5424	366466	39567	220942	0.367667	0.3352-0.4001	0.0974	0.0964-0.0984	M	I2c1	..	0.0544439	0.0133219	0.00901204	0.0567228	0.0138434	0.00955777	0.006667	0.00725988	0.01	0	0.02
KH210855	289.001	petrous bone	Sorsum	this study	15370849	47.3175	0.23438	25.1193	8992	590560	5316	224467	0.746722	0.6838-0.8097	0.0089	0.0087-0.0091	F	..	X2b	0.0779252	0.0142489	0.00863537	0.0754462	0.0136874	0.00811627			0.01	0	0.02
KH210856	1563.02	petrous bone	Sorsum	this study	12774293	51.4457	0.212039	15.3624	5429	229183	24415	190954	0.343712	0.3103-0.3771	0.0963	0.0951-0.0975	M	I2c1a1	K1a4a1	0.052448	0.0128777	0.00888367	0.0511698	0.0124544	0.00877507	0.013263	0.0109887	0.01	0	0.02
KH210857	304.001	petrous bone	Sorsum	this study	4202488	52.1771	0.070662	5.7266	1933	152677	1573	89717	0.707907	0.642-0.7739	0.0102	0.0096-0.0108	F	..	..	0.0695119	0.0145079	0.0101416	0.0660352	0.0132516	0.00916939			0.01	0	0.02
KH210858_KH210949	1196.01	petrous bone	Sorsum	this study	7191474	73.7527	0.171277	4.57372	1102	148759	16682	152795	0.400536	0.3691-0.432	0.1008	0.0994-0.1022	M	I2c1a1a	K1a	0.0530591	0.0111181	0.0073938	0.0518206	0.0107487	0.00726128	-0.001337	0.00161098	0.02	0.01	0.03
KH210860	1667.01	petrous bone	Sorsum	this study	827604	63.3381	0.01697	0.609995	150	17289	1861	34968	0.404378	0.3676-0.4412	0.0972	0.0931-0.1013	M	I	..	0.042004	0.0139477	0.00962764	0.0429002	0.0139435	0.0100521	0	0
KH210891	1515	petrous bone	Sorsum	this study	3973176	74.9507	0.095979	1.71742	407	153059	1113	97355	0.762945	0.6949-0.831	0.0072	0.0068-0.0076	F	..	..	0.0347372	0.0105942	0.00708484	0.0363945	0.0103669	0.00711562
KH210893_KH210948	1203.02	petrous bone	Sorsum	this study	1438942	65.506	0.030422	1.42803	343	31586	3444	47836	0.422981	0.3872-0.4587	0.0983	0.0952-0.1014	M	I	H2a2a	0.0387182	0.0124513	0.00899284	0.0376777	0.0120514	0.00889918	0.103488	0.104202
KH210896_KH220421	1657.01	petrous bone & tooth	Sorsum	this study	9207501	64.4564	0.191093	7.75008	2101	390371	2885	184515	0.83253	0.7717-0.8933	0.0073	0.0071-0.0075	F	..	H1	0.0514798	0.00955441	0.00598202	0.0508935	0.00940658	0.00599636			0.02	0.01	0.03
KH210897	1574.01	petrous bone	Sorsum	this study	1452691	61.3396	0.028698	0.657855	193	54730	494	52254	0.742422	0.6798-0.8051	0.0089	0.0081-0.0097	F	..	..	0.0660502	0.0132429	0.00789709	0.0639882	0.0134462	0.00787194
KH210898	361.0201/a	petrous bone	Sorsum	this study	2060659	60.3519	0.040088	1.12674	324	80396	517	66748	0.768298	0.7094-0.8272	0.0064	0.0058-0.007	F	..	..	0.079265	0.0134601	0.00737563	0.0791853	0.0133636	0.00743138			0.01	0	0.02
KH210899	199.015	petrous bone	Sorsum	this study	13431817	72.2186	0.312505	10.8122	2884	538119	3057	212276	0.789903	0.7274-0.8524	0.0056	0.0054-0.0058	F	..	X2b4	0.0462493	0.0105821	0.00664235	0.0462723	0.0104023	0.00662501			0.01	0	0.02
KH210900	361.0201/b	petrous bone	Sorsum	this study	28498846	79.2397	0.728471	24.6498	5681	637839	73176	401759	0.432427	0.4025-0.4624	0.1029	0.1021-0.1037	M	I2c1a1	H3aa	0.0441325	0.0129287	0.0069103	0.04469	0.0127034	0.00682649	0.006715	0.00387444	0.01	0	0.02
KH210901	271.007	petrous bone	Sorsum	this study	1117573	65.6385	0.023611	1.3859	339	44759	497	34034	0.782825	0.7176-0.8481	0.011	0.01-0.012	F	..	..	0.0387219	0.0120811	0.00889942	0.0384065	0.011651	0.00868743
KH210902	1540.02	petrous bone	Sorsum	this study	7122323	82.2307	0.188717	6.95546	1531	319702	1838	156246	0.886203	0.8229-0.9495	0.0057	0.0055-0.0059	F	..	J1c3	0.0391838	0.0121655	0.00672121	0.0400462	0.0119083	0.00693961			0.01	0	0.02
KH210904	750.018	petrous bone	Sorsum	this study	3147322	71.9112	0.072964	4.33231	979	134751	1089	78363	0.841004	0.7738-0.9082	0.008	0.0076-0.0084	F	..	U5b1	0.0402615	0.0123741	0.00751707	0.0407828	0.012213	0.0074556			0.09	0.06	0.12
KH210908	1587.02	petrous bone	Sorsum	this study	8026288	71.5082	0.185199	12.9697	3144	178992	20786	163148	0.429381	0.3963-0.4625	0.104	0.1026-0.1054	M	I2c	U5b2b	0.0440669	0.0108774	0.00640618	0.0444663	0.0106789	0.00640275	-0.003561	0.00144086	0.01	0	0.02
KH210909	1648.02	petrous bone	Sorsum	this study	1710651	72.1	0.039949	1.79848	411	35124	4183	62130	0.399378	0.366-0.4328	0.1064	0.1033-0.1095	M	I2c1a1	..	0.0510075	0.0149182	0.0101995	0.0514619	0.0150421	0.0102947	0	0
KH210913	1199.01	petrous bone	Sorsum	this study	848406	67.9676	0.018741	2.28571	503	19032	2086	23287	0.430394	0.395-0.4658	0.0988	0.0947-0.1029	M	I	H1q	0.0402307	0.0146745	0.00964065	0.0399534	0.0146773	0.00950593	0	0	0.03	0	0.06
KH210914	200.025	petrous bone	Sorsum	this study	5075484	67.0859	0.109873	6.67536	1712	110374	12880	108187	0.417346	0.3825-0.4522	0.1045	0.1027-0.1063	M	I2c	H2	0.0499659	0.0121724	0.00742117	0.0490818	0.0120326	0.00738257	0.020903	0.0234454	0.01	0	0.02
KH210915	1297.02	petrous bone	Sorsum	this study	6815687	77.8569	0.171313	9.84055	2101	152917	18520	148770	0.432209	0.3971-0.4673	0.108	0.1066-0.1094	M	I2c	H2	0.0382995	0.0101893	0.0064455	0.0367146	0.00999476	0.00652984	0.035366	0.0210071	0.01	0	0.02
KH210919	1669.01/a	petrous bone	Sorsum	this study	1171709	69.3062	0.026227	1.93096	443	49122	470	31312	0.82065	0.7496-0.8917	0.0095	0.0087-0.0103	F	..	H2a	0.0408882	0.0126805	0.00852499	0.0400979	0.012716	0.00856013
KH210920	1669.01/b	petrous bone	Sorsum	this study	843784	66.7573	0.018164	0.662925	155	33888	389	24412	0.785848	0.7154-0.8563	0.0113	0.0101-0.0125	F	..	..	0.044486	0.0149919	0.0100902	0.0445667	0.0145682	0.0097749
KH210921	352.001	petrous bone	Sorsum	this study	1189155	69.9116	0.026956	2.55441	519	26514	3123	35929	0.428685	0.392-0.4653	0.1054	0.1019-0.1089	M	I	..	0.0437841	0.0143495	0.0103956	0.0415596	0.0140192	0.00982828	0	0
KH210923	1562.01	petrous bone	Sorsum	this study	7030249	86.3057	0.19565	4.67011	952	287933	1664	137587	0.810647	0.7421-0.8792	0.0057	0.0055-0.0059	F	..	H1q	0.0436087	0.0111653	0.00698294	0.0413142	0.010883	0.00702861			0.01	0	0.02
KH210924	1414	petrous bone	Sorsum	this study	2639490	74.3379	0.063314	2.73215	630	57972	6556	75198	0.423376	0.3892-0.4576	0.1016	0.0992-0.104	M	I2c	H5	0.0478235	0.0124921	0.00839983	0.0463964	0.0123012	0.00799238	-0.002146	0	0.02	0.01	0.03
KH210925_KH210941	1351	petrous bone	Sorsum	this study	8552944	77.2096	0.212715	9.11232	2058	353447	2374	153937	0.81407	0.7468-0.8813	0.0067	0.0065-0.0069	F	..	V	0.0506591	0.013428	0.00886865	0.0497383	0.013028	0.00878768			0.01	0	0.02
KH210928_KH210942	457.005	petrous bone	Sorsum	this study	9021078	77.4683	0.225286	11.2933	2551	375719	2496	170356	0.819447	0.7556-0.8833	0.0066	0.0064-0.0068	F	..	U5a1c	0.0563379	0.0132329	0.00854965	0.0569663	0.013072	0.00865606			0.01	0	0.02
KH210929	1593.02	petrous bone	Sorsum	this study	10402082	64.1763	0.215457	9.66534	2621	218998	25098	157168	0.405371	0.371-0.4397	0.1028	0.1016-0.104	M	I2c	K1a	0.0663275	0.0121372	0.00711259	0.0644095	0.0118534	0.00694292	0.003046	0.00727637	0.01	0	0.02	Age-at-death estimation is given in Moser et al. 2024 (https://doi.org/10.1002/oa.3363)
KH210930_KH210945	1498	petrous bone	Sorsum	this study	14836711	80.8413	0.387216	13.7309	2958	317641	39309	218635	0.41321	0.3783-0.4481	0.1101	0.1091-0.1111	M	I2c1a1	K1a	0.0389189	0.0102722	0.00769239	0.0387655	0.010177	0.00778057	0.012361	0.00821008	0.01	0	0.02
KH210931	1656.02	petrous bone	Sorsum	this study	12070191	82.3743	0.320643	7.93204	1690	487346	3032	177587	0.797054	0.7266-0.8675	0.0062	0.006-0.0064	F	..	X2b	0.0436932	0.0117793	0.00818657	0.0439246	0.011624	0.0082013
KH210933	1521	petrous bone	Sorsum	this study	3675870	76.4821	0.090881	1.6587	373	74115	8936	92253	0.390923	0.356-0.4259	0.1076	0.1054-0.1098	M	G1a2a	..	0.0570079	0.0126975	0.0078822	0.0527323	0.0122948	0.00769375	-0.003603	0.00170858
KH210934	1611.02	petrous bone	Sorsum	this study	1457332	69.3008	0.03264	1.28155	298	57892	525	48481	0.77989	0.7111-0.8487	0.009	0.0082-0.0098	F	..	K1a	0.0462624	0.0128533	0.0092637	0.0436802	0.01216	0.00906436			0.01	0	0.02
KH210936	1609.02	petrous bone	Sorsum	this study	7754037	69.4232	0.173429	9.95208	2448	328214	2253	144467	0.829016	0.7628-0.8953	0.0068	0.0066-0.007	F	..	K1a	0.0523903	0.0122814	0.00853458	0.0510785	0.0116665	0.00846343			0.02	0.01	0.03
KH210939	365.002	petrous bone	Sorsum	this study	2572577	66.8066	0.055479	3.2049	867	54301	6056	70029	0.405737	0.3719-0.4396	0.1003	0.0979-0.1027	M	I	H1q	0.0585978	0.0138584	0.00932456	0.0577211	0.0134568	0.00929012	-0.002567	0.0059238	0.01	0	0.02
KH210943	1336.01	petrous bone	Sorsum	this study	1208607	70.1234	0.027356	0.677651	172	45231	419	45357	0.737495	0.6718-0.8032	0.0092	0.0084-0.01	F	..	..	0.0703529	0.0165474	0.0108181	0.067741	0.015803	0.0105204
KH210946	516.004	petrous bone	Sorsum	this study	1661733	50.2832	0.026936	2.54807	851	71564	610	47605	0.843238	0.7885-0.898	0.0085	0.0079-0.0091	F	..	H1	0.0847166	0.01423	0.00904928	0.0828698	0.0139919	0.00885026			0.01	0	0.02
KH210947	3.0132	petrous bone	Sorsum	this study	2679398	73.6345	0.063717	3.72255	847	56158	6929	73154	0.403428	0.3689-0.4379	0.1098	0.1074-0.1122	M	I	H1	0.0622132	0.0142427	0.00962572	0.0623029	0.0138668	0.00934972	-0.002617	0.0067356	0.01	0	0.02
KH210954	818.001	petrous bone	Sorsum	this study	5113012	75.7783	0.124996	2.52236	601	188575	1303	106933	0.731225	0.6641-0.7984	0.0069	0.0065-0.0073	F	..	..	0.0676397	0.0124498	0.0075725	0.0661493	0.0124549	0.00760068			0.01	0	0.03
KH210955	269.024/a	petrous bone	Sorsum	this study	1131466	56.0393	0.02045	0.942664	301	47860	579	23294	0.821196	0.7615-0.8809	0.012	0.011-0.013	F	..	..	0.0927527	0.015698	0.00917528	0.0907731	0.0155334	0.00899204			0.01	0	0.02
KH210956	269.024/b	petrous bone	Sorsum	this study	2128185	59.4237	0.040755	1.85926	542	49432	5886	48251	0.443921	0.4159-0.4719	0.1064	0.1039-0.1089	M	I	J1c1f	0.0916672	0.0151556	0.00922159	0.0873514	0.0151382	0.00913338	0	0	0.01	0	0.02
KH210957	506	petrous bone	Sorsum	this study	12938586	73.3869	0.305625	9.63842	2558	573676	4866	222354	0.866989	0.801-0.933	0.0084	0.0082-0.0086	F	..	U5b1	0.0511994	0.0126413	0.00885539	0.0522037	0.0123136	0.0088397			0.02	0.01	0.03
KH220423	369.002	tooth	Sorsum	this study	780239	75.5963	0.019075	2.63142	633	18425	1940	24768	0.451714	0.4281-0.4753	0.0953	0.0912-0.0994	M	I2c1a1	K1a4a1	0.03139	0.00703409	0.00545139	0.0301358	0.00788893	0.00543638	0	0	0.01	0	0.03
KH220427	1504	tooth	Sorsum	this study	1344730	68.3621	0.029624	3.20448	830	60994	510	39024	0.885437	0.8382-0.9327	0.0083	0.0075-0.0091	F	..	H1	0.0510853	0.00885382	0.00580769	0.0489272	0.00878445	0.00569918			0.01	0	0.03
KH220443	1622.02	tooth	Sorsum	this study	1363295	69.3772	0.030512	5.94103	1606	61953	502	40688	0.887762	0.8405-0.935	0.008	0.0072-0.0088	F	..	H1	0.0501742	0.00820034	0.00570512	0.0486031	0.0081744	0.00546451			0.01	0	0.02
KH200127_KH200128_KH201232	WB1028	petrous bone & tooth	Warburg I	this study	106338979	53.0234	1.82095	146.009	45663	2620646	251057	1040387	0.479055	0.458-0.5001	0.0874	0.087-0.0878	M	I2a1a1a	K1a	0.134174	0.0176128	0.0102138	0.130295	0.0172928	0.00994137	0.012555	0.00201427	0.02	0.01	0.03
KH200132	WB1029	petrous bone	Warburg I	this study	3369263	57.339	0.062191	4.1475	1243	152459	1340	86502	0.88441	0.8392-0.9296	0.0087	0.0083-0.0091	F	..	H1q	0.118855	0.0120617	0.00720907	0.117399	0.0119578	0.00714228			0.03	0.02	0.04
KH200133	WB1030	petrous bone	Warburg I	this study	3520582	59.0993	0.067125	4.79631	1379	81034	8453	93568	0.439261	0.4166-0.4619	0.0945	0.0925-0.0965	M	I	J1c1	0.100513	0.0115609	0.00750156	0.0984283	0.0113574	0.00718545	0	0	0.01	0	0.02
KH200134_KH201258	WB1031	petrous bone	Warburg I	this study	7614263	57.0027	0.140506	10.315	2980	177776	18825	187413	0.44672	0.4252-0.4682	0.0958	0.0944-0.0972	M	I2c	U5b1	0.0926339	0.0105666	0.00758152	0.0928926	0.0106092	0.00756976	-0.003041	0.0031322	0.03	0.02	0.04
KH200137_KH200219	WB1032	petrous bone	Warburg I	this study	2812660	59.009	0.053557	4.47722	1310	67391	7029	75192	0.462128	0.4414-0.4829	0.0945	0.0923-0.0967	M	I	U5a1	0.111769	0.0123997	0.00752552	0.109097	0.0122521	0.00740158	0	0	0.01	0	0.02
KH200140	WB1033	petrous bone	Warburg I	this study	965703	54.3586	0.016917	0.323797	105	45824	360	24027	0.940442	0.8987-0.9822	0.0078	0.007-0.0086	F	..	..	0.134857	0.0136508	0.0081633	0.134001	0.0136224	0.00806471
KH200150	WB1034	petrous bone	Warburg I	this study	1154354	52.2345	0.019397	1.18915	389	54772	476	27708	0.939224	0.898-0.9804	0.0086	0.0078-0.0094	F	..	..	0.162319	0.0162501	0.00955232	0.154904	0.0161793	0.00966005			0.07	0.03	0.11
KH200153	WB1035	petrous bone	Warburg I	this study	3634249	53.4874	0.062924	12.9159	3840	83371	8470	90476	0.438945	0.4167-0.4612	0.0922	0.0902-0.0942	M	I2a2a2a	H1	0.115833	0.0150923	0.010792	0.113945	0.0147491	0.0107103	0	0	0.01	0	0.02
KH200155	WB1036	petrous bone	Warburg I	this study	5545086	60.8398	0.108885	8.10145	2261	135464	13972	148127	0.473311	0.4526-0.494	0.0935	0.0919-0.0951	M	I2a	K1e	0.11619	0.012408	0.00824908	0.115011	0.0121496	0.00823844	0	0	0.01	0	0.02
KH200159	WB1037	petrous bone	Warburg I	this study	2596249	54.822	0.045923	2.4267	750	60458	6266	65587	0.445179	0.4229-0.4675	0.0939	0.0917-0.0961	M	I	..	0.144734	0.0161364	0.00911228	0.141517	0.0159147	0.00899578	0	0	0.02	0	0.04
KH200165	WB1038	petrous bone	Warburg I	this study	1225237	61.6676	0.02441	1.53298	415	28875	3071	35303	0.451952	0.4291-0.4748	0.0961	0.093-0.0992	M	..	U5b2a1a	0.0917709	0.0101952	0.00683273	0.0902974	0.0100477	0.00686686	0	0	0.01	0	0.04
KH200166	WB1039	petrous bone	Warburg I	this study	3590629	51.2361	0.059514	8.79238	2757	89355	9106	85853	0.485305	0.4639-0.5067	0.0925	0.0907-0.0943	M	I2	H3	0.144065	0.0160258	0.0101946	0.138178	0.0154133	0.0101097	-0.007549	0.0163024	0.01	0	0.02
KH200169	WB1040	petrous bone	Warburg I	this study	893567	58.7695	0.016956	0.566238	165	21309	2152	23975	0.457603	0.437-0.4782	0.0917	0.088-0.0954	M	..	..	0.129534	0.0153635	0.00991635	0.126661	0.0146793	0.00966098	0		0.01	0	0.02
KH200172	WB1041	petrous bone	Warburg I	this study	1983290	57.0872	0.03653	1.84881	541	90227	804	51388	0.888413	0.8454-0.9314	0.0088	0.0082-0.0094	F	..	..	0.127491	0.0138905	0.00882735	0.127541	0.0141984	0.00885521			0.01	0	0.02
KH200179	WB1042	petrous bone	Warburg I	this study	1924047	60.482	0.037552	2.5558	726	89853	710	52239	0.918071	0.8766-0.9595	0.0078	0.0072-0.0084	F	..	W5	0.122028	0.0125617	0.00765433	0.120809	0.0125644	0.00764029			0.01	0	0.02
KH200185	WB1043	petrous bone	Warburg I	this study	1470231	54.9501	0.026096	1.18408	369	33828	3465	36817	0.439535	0.4177-0.4613	0.0929	0.09-0.0958	M	I	..	0.135493	0.0138876	0.00872958	0.134315	0.0145423	0.00865144	-0.041706	0.126047	0.01	0	0.02
KH200191	WB1044	petrous bone	Warburg I	this study	3216911	60.5828	0.062948	6.327	1775	73937	7731	85831	0.438582	0.4159-0.4613	0.0947	0.0927-0.0967	M	I	U5b2b3a1	0.112889	0.0111801	0.00744779	0.113852	0.0117059	0.0078142	0	0	0.01	0	0.02
KH200192	WB1045	petrous bone	Warburg I	this study	1097589	54.0847	0.019168	1.49647	464	24999	2517	28482	0.433718	0.4115-0.4559	0.0915	0.0882-0.0948	M	I	U5b2a1a	0.113938	0.0118979	0.00785496	0.113559	0.0115945	0.00740398	-0.039837	0	0.06	0	0.14
KH200194	WB1046	petrous bone	Warburg I	this study	2853568	60.8909	0.056163	4.3789	1177	120652	1953	76146	0.820809	0.7785-0.8631	0.0159	0.0151-0.0167	F	..	W5	0.11505	0.0120327	0.00723374	0.119248	0.0124684	0.00763095			0.13	0.1	0.16
KH200197	WB1047	petrous bone	Warburg I	this study	3557947	57.1247	0.065548	5.25831	1537	162749	1329	90513	0.895421	0.8523-0.9386	0.0081	0.0077-0.0085	F	..	U5b1	0.132452	0.0125048	0.00819031	0.132786	0.0130328	0.00805596			0.01	0	0.02
KH200200	WB1048	petrous bone	Warburg I	this study	2714535	58.3173	0.05111	4.59895	1315	64770	6656	72706	0.45866	0.4377-0.4796	0.0932	0.091-0.0954	M	I2a2a2a	H45	0.145327	0.0136925	0.00962241	0.139629	0.0133407	0.00921748	-0.026918	0.0272988	0.02	0.01	0.03
KH200201	WB1049	petrous bone	Warburg I	this study	1559189	55.1631	0.027814	1.69141	511	36428	3648	39854	0.446281	0.4236-0.469	0.091	0.0883-0.0937	M	..	K1a	0.130688	0.0132093	0.00853306	0.13168	0.0133142	0.00878155	0	0	0.01	0	0.03
KH200210	WB1050	petrous bone	Warburg I	this study	3299638	61.599	0.065586	5.49689	1462	151255	1226	90528	0.897362	0.8534-0.9413	0.008	0.0076-0.0084	F	..	X2c2	0.122627	0.0114944	0.00832229	0.121512	0.0119189	0.00844145			0.01	0	0.02
KH200229	WB1051	petrous bone	Warburg I	this study	5464728	64.1673	0.113151	5.7721	1545	274463	1866	148300	1.01108	0.9633-1.0589	0.0068	0.0064-0.0072	F	..	H	0.158607	0.0132167	0.0077397	0.154186	0.0129574	0.00731667			0.02	0.01	0.03
KH200230_KH201255	WB1052	petrous bone & tooth	Warburg I	this study	4055023	56.322	0.073745	5.7948	1759	95412	9847	101209	0.45165	0.4305-0.4728	0.0936	0.0918-0.0954	M	I2	J1c1	0.163504	0.0156822	0.00898177	0.16208	0.0153879	0.00900593	0	0	0.01	0	0.02
KH200231	WB1053	petrous bone	Warburg I	this study	3800042	63.2335	0.077584	5.89124	1584	90839	9353	105247	0.459806	0.439-0.4806	0.0934	0.0916-0.0952	M	I2	H1	0.108882	0.0124449	0.00820806	0.107674	0.0123565	0.00798057	0	0	0.01	0	0.02
KH200233	WB1054	petrous bone	Warburg I	this study	2322418	67.7852	0.050832	3.69431	920	113182	774	70964	0.976449	0.9301-1.0228	0.0068	0.0064-0.0072	F	..	U5b1	0.124979	0.0114625	0.00698971	0.123654	0.0112983	0.00677896			0.02	0.01	0.03
KH200234	WB1055	petrous bone	Warburg I	this study	3431920	67.3569	0.07458	6.40268	1608	83952	8743	100605	0.474004	0.4532-0.4948	0.0943	0.0923-0.0963	M	I	H1c	0.167355	0.0115954	0.00805117	0.167321	0.0119926	0.00799307	-0.004536	0.00967216	0.01	0	0.02
KH200235	WB1056	petrous bone	Warburg I	this study	1398705	57.6837	0.026046	1.19983	343	32638	3363	37069	0.448239	0.4269-0.4696	0.0934	0.0905-0.0963	M	I	..	0.16484	0.0143155	0.00810736	0.163769	0.0141862	0.00850308	0	0	0.01	0	0.02
KH200236	WB1057	petrous bone	Warburg I	this study	4403116	64.6063	0.091818	11.6858	3039	201851	1544	122968	0.897666	0.8536-0.9417	0.0076	0.0072-0.008	F	..	H1	0.152881	0.0142046	0.0099658	0.150931	0.0140253	0.00988812			0.01	0	0.02
KH201249	WB1058	petrous bone	Warburg I	this study	1608470	59.18	0.030661	1.59521	459	79786	584	41405	0.998568	0.9512-1.0459	0.0073	0.0067-0.0079	F	..	..	0.134274	0.0137495	0.00814119	0.124949	0.0131556	0.00785016			0.01	0	0.02
KH201254	WB1059	petrous bone	Warburg I	this study	1024504	50.9026	0.016899	1.17871	356	25135	2456	23856	0.471987	0.4512-0.4927	0.089	0.0857-0.0923	M	..	..	0.105296	0.0173299	0.0104253	0.106074	0.0175542	0.0102826	0		0.01	0	0.02
KH201256	WB1060	petrous bone	Warburg I	this study	6048831	61.3503	0.119613	8.09403	2273	282716	2131	157802	0.919588	0.8777-0.9615	0.0075	0.0071-0.0079	F	..	H1	0.0734785	0.0104798	0.00708772	0.0739346	0.0105648	0.00722431			0.02	0.01	0.03
KH180066	WB1001	petrous bone	Warburg III	daSilvaGenomeBiology2025	24315738	67.6174	0.530015	39.0104	10521	376951	37559	360846	0.396328	0.3658-0.4269	0.0906	0.0898-0.0914	M	I2a1a2a	H1q	0.0849356	0.0128091	0.00849653	0.0855015	0.0130268	0.00882055	0.017903	0.00787055	0.01	0	0.02
KH180068	WB1002	petrous bone	Warburg III	daSilvaGenomeBiology2025	18907577	54.3743	0.331512	12.8236	4214	476841	3269	233814	0.753798	0.6873-0.8203	0.0068	0.0066-0.007	F	..	J2b1a	0.119729	0.0133309	0.00758288	0.118546	0.0134367	0.0075931			0.02	0.01	0.03
KH180072	WB1005	petrous bone	Warburg III	this study	2607830	61.4477	0.051748	3.7712	1043	65325	6688	70706	0.488726	0.4667-0.5107	0.0929	0.0907-0.0951	M	I1a2a1a1a	K1a	0.166315	0.0144482	0.00899992	0.156058	0.0131192	0.00839688	0.118751	0.119887	0.03	0.02	0.04
KH180088	WB1014	petrous bone	Warburg III	this study	1538690	66.404	0.032956	2.39858	617	73432	525	45773	0.943809	0.9016-0.9861	0.0071	0.0065-0.0077	F	..	N1a1a1a2	0.116883	0.0137413	0.00901019	0.115383	0.013028	0.00912969			0.01	0	0.02
KH180089	WB1015	petrous bone	Warburg III	this study	6030457	64.276	0.125095	12.6978	3500	290552	1989	163721	0.957878	0.9149-1.0009	0.0068	0.0064-0.0072	F	..	H4a1a1a1	0.143346	0.0145603	0.010711	0.141311	0.014536	0.0106663			0.01	0	0.02
KH180092_KH201271	WB1018	petrous bone	Warburg III	this study	4535496	60.1906	0.088023	7.5946	2201	108136	11229	122060	0.458821	0.4381-0.4795	0.0941	0.0925-0.0957	M	I	K1e	0.112903	0.0137037	0.00909335	0.108301	0.0132525	0.00876201	0	0	0.01	0	0.02
KH180094	WB1019	petrous bone	Warburg III	this study	4087672	71.8822	0.094914	7.30684	1733	96436	10295	121435	0.452476	0.4309-0.4741	0.0965	0.0947-0.0983	M	I2a	K1a3a	0.0593549	0.0106317	0.00738468	0.0591499	0.0109616	0.00725559	0	0	0.04	0.03	0.05
KH180095_KH210417_KH210433	WB1020	petrous bone & tooth	Warburg III	this study	3398610	66.2043	0.072625	4.99801	1265	144093	963	98818	0.829434	0.7695-0.8894	0.0066	0.0062-0.007	F	..	U5b3b	0.0811727	0.0139839	0.00886495	0.0811187	0.0138691	0.00917748			0.02	0.01	0.03
KH201269	WB1061	petrous bone	Warburg III	this study	1101995	51.9515	0.018488	1.39658	437	26361	2601	26650	0.459631	0.4382-0.4811	0.0898	0.0865-0.0931	M	..	J2b1a1	0.0809414	0.0121602	0.00809813	0.082571	0.0119454	0.00841254	0	0	0.01	0	0.04
KH201272	WB1062	tooth	Warburg III	this study	852456	51.4745	0.014181	1.30255	454	20971	1981	20149	0.476508	0.4556-0.4974	0.0863	0.0826-0.09	M	I	K2a11	0.115664	0.0122131	0.00728202	0.116161	0.0123474	0.00732336	0	0	0.01	0	0.02
KH201273	WB1063	petrous bone	Warburg III	this study	1442181	51.9384	0.024184	1.43648	460	34903	3413	34704	0.466234	0.446-0.4865	0.0891	0.0862-0.092	M	..	..	0.159841	0.0152462	0.00848378	0.160655	0.0151474	0.00829582	0	0	0.04	0.01	0.07
KH201292_KH201346	WB1064	petrous bone & tooth	Warburg III	this study	41377980	41.945	0.560215	35.2724	11982	1880895	14072	577278	0.892951	0.8523-0.9336	0.0074	0.0072-0.0076	F	..	J2b1a	0.112775	0.0146558	0.00918774	0.110563	0.0145589	0.009085			0.02	0.01	0.03
KH201307	WB1065	petrous bone	Warburg III	this study	1642553	55.9731	0.02966	1.99734	601	81318	543	40020	0.995913	0.9479-1.0439	0.0066	0.006-0.0072	F	..	K1a	0.115228	0.0144255	0.00901251	0.110393	0.0139557	0.00844883			0.02	0	0.04
KH201322	WB1066	petrous bone	Warburg III	this study	2107711	63.8571	0.043451	2.7333	757	101587	830	59108	0.963701	0.9194-1.008	0.0081	0.0075-0.0087	F	..	K2a11	0.0733343	0.0122067	0.00886454	0.0723571	0.0121776	0.00895146			0.01	0	0.02
KH210310	WB1067	petrous bone	Warburg III	this study	1316075	66.2723	0.028198	4.17074	1010	28644	3291	37910	0.416037	0.3954-0.4366	0.1031	0.0998-0.1064	M	I	N1a1a1a2	0.0933115	0.0162141	0.0110102	0.0913224	0.0161565	0.0109892	0	0	0.02	0.01	0.03
KH210314	WB1068	petrous bone	Warburg III	this study	1086522	46.2308	0.016205	0.904038	335	49276	419	23506	0.890155	0.8503-0.93	0.0084	0.0076-0.0092	F	..	..	0.192703	0.0259003	0.0113958	0.193497	0.0263202	0.0111351			0.03	0	0.08
KH210316	WB1069	petrous bone	Warburg III	this study	954796	63.2929	0.019488	1.90531	531	23636	2513	26563	0.479566	0.459-0.5001	0.0961	0.0926-0.0996	M	..	T2b3	0.0900562	0.013774	0.00956575	0.0845318	0.0134167	0.00867994	0	0	0.01	0	0.02
KH210412	WB1070	petrous bone	Warburg III	this study	1716704	67.4616	0.037362	2.67735	707	40955	4272	52189	0.459143	0.437-0.4813	0.0945	0.0918-0.0972	M	..	..	0.0769387	0.0127023	0.0079362	0.0772075	0.0123467	0.00800437	0	0
KH210418	WB1071	petrous bone	Warburg III	this study	1347527	58.3731	0.025414	1.59708	457	32070	3278	36248	0.456625	0.4345-0.4788	0.0927	0.0898-0.0956	M	I	..	0.0962601	0.0122647	0.00713635	0.0953741	0.012328	0.00684185	0	0	0.01	0	0.02
KH180070	WB1003	petrous bone	Warburg IV	daSilvaGenomeBiology2025	966873	67.8932	0.021208	0.629428	174	20227	1950	32592	0.396251	0.361-0.4315	0.0879	0.0842-0.0916	M	..	..	0.0982183	0.0127778	0.00703133	0.0996055	0.0132203	0.00708849	0	0
KH180071	WB1004	petrous bone	Warburg IV	daSilvaGenomeBiology2025	73913071	71.231	1.70062	98.1209	26512	1307611	132120	803110	0.432771	0.4063-0.4593	0.0918	0.0914-0.0922	M	I2	H1	0.0900832	0.0110075	0.00665621	0.0900754	0.0110939	0.0067	0.003168	0.00169287	0.01	0	0.02
KH180075	WB1006	petrous bone	Warburg IV	daSilvaGenomeBiology2025	5068281	71.2473	0.116609	3.69389	991	154140	873	120923	0.794299	0.7332-0.8554	0.0056	0.0052-0.006	F	..	..	0.102309	0.0112846	0.00672653	0.102156	0.0114173	0.00666139			0.01	0	0.02
KH180076	WB1007	petrous bone	Warburg IV	this study	2195331	60.7554	0.04308	3.03428	838	54662	5526	60306	0.483539	0.462-0.5051	0.0918	0.0894-0.0942	M	I	U5a1c	0.10696	0.013326	0.00872814	0.106174	0.0134103	0.00885686	0	0	0.02	0	0.04
KH180077	WB1008	petrous bone	Warburg IV	daSilvaGenomeBiology2025	7220530	68.41	0.159232	3.97918	1094	168691	16922	183765	0.407498	0.3779-0.4371	0.0912	0.0898-0.0926	M	I	U5b1i	0.104177	0.014346	0.00822858	0.102915	0.014368	0.00834383	-0.003102	0.00240799	0.01	0	0.02
KH180078	WB1009	petrous bone	Warburg IV	daSilvaGenomeBiology2025	37362662	71.3692	0.858491	25.6942	6963	800605	79152	587851	0.412651	0.3842-0.4411	0.09	0.0894-0.0906	M	I	U5b1	0.0881833	0.0116159	0.00697833	0.0874535	0.0115862	0.0070631	0.005955	0.00314616	0.01	0	0.02
KH180084	WB1010	petrous bone	Warburg IV	this study	3842912	64.7589	0.080288	5.31384	1434	187184	1437	106541	0.970304	0.9264-1.0142	0.0076	0.0072-0.008	F	..	H3	0.129983	0.0145226	0.00937204	0.128714	0.0146332	0.00910077			0.03	0.02	0.04
KH180085	WB1011	petrous bone	Warburg IV	this study	3532657	43.9596	0.050167	3.04249	1124	88679	8359	69206	0.497234	0.4712-0.5233	0.0861	0.0843-0.0879	M	I2a1a	U5b3	0.234717	0.0166773	0.0100789	0.23085	0.0161497	0.00959254	0	0	0.04	0.03	0.05
KH180086	WB1012	petrous bone	Warburg IV	daSilvaGenomeBiology2025	31028287	69.9302	0.699787	52.5379	13426	736410	74307	594013	0.458102	0.4336-0.4826	0.0917	0.0911-0.0923	M	I2a1a	T2c1d	0.086536	0.0142607	0.00886992	0.084512	0.0144569	0.00910919	0.002667	0.00245646	0.01	0	0.02
KH180087	WB1013	petrous bone	Warburg IV	daSilvaGenomeBiology2025	7676513	70.7679	0.175488	8.7275	2217	171833	17256	204371	0.431083	0.4025-0.4596	0.0913	0.0899-0.0927	M	I	X2b	0.0978675	0.0127574	0.00772565	0.0966335	0.0130454	0.00777444	-0.002622	0.00252641	0.01	0	0.02
KH180090	WB1016	petrous bone	Warburg IV	daSilvaGenomeBiology2025	13560447	61.613	0.269913	10.7457	3246	297784	29672	284475	0.421648	0.3928-0.4505	0.0906	0.0896-0.0916	M	I	X2b	0.119658	0.013414	0.00755567	0.118209	0.0135856	0.00764818	-0.001163	0.000600754	0.01	0	0.02
KH180091	WB1017	petrous bone	Warburg IV	daSilvaGenomeBiology2025	9132203	60.3503	0.177839	14.56	4210	217209	22201	218301	0.458055	0.4342-0.4819	0.0927	0.0915-0.0939	M	I2a1a1a	H3	0.0942781	0.0141255	0.00889594	0.0935341	0.0144056	0.00865704	-0.00153	0.00164559
KH180119	WB1021	petrous bone	Warburg IV	this study	4642710	63.7227	0.095431	10.2563	2725	117936	12041	129057	0.497495	0.4748-0.5202	0.0926	0.091-0.0942	M	I2a1a2a	J2b1a	0.104688	0.0113232	0.0079266	0.104639	0.0114132	0.00801992	-0.002654	0	0.02	0.01	0.03
KH180120	WB1022	petrous bone	Warburg IV	daSilvaGenomeBiology2025	7463250	56.9535	0.137051	4.8438	1568	215911	1350	126992	0.851713	0.7955-0.9079	0.0062	0.0058-0.0066	F	..	H5	0.115969	0.013732	0.00732237	0.115812	0.0136624	0.00742416			0.01	0	0.02
KH180121	WB1023	petrous bone	Warburg IV	daSilvaGenomeBiology2025	42069018	58.3901	0.793242	30.7168	9639	655676	65439	524175	0.434062	0.4071-0.461	0.0907	0.0901-0.0913	M	I2a1a2	U5b3	0.123207	0.0127019	0.00680419	0.122079	0.0127365	0.006811	0.004976	0.00387222	0.01	0	0.02
KH180122	WB1024	petrous bone	Warburg IV	daSilvaGenomeBiology2025	2431696	54.0158	0.042417	1.86933	607	53774	5146	65039	0.423807	0.3967-0.4509	0.0873	0.0849-0.0897	M	..	U5b2a2	0.143621	0.0145503	0.00772486	0.142798	0.0146117	0.00774618	-0.005994	0	0.01	0	0.03
KH180123	WB1025	petrous bone	Warburg IV	daSilvaGenomeBiology2025	12777533	64.0466	0.264473	15.6603	4296	390963	2618	221914	0.909946	0.8648-0.9551	0.0067	0.0065-0.0069	F	..	K2a11	0.0977843	0.0132113	0.00750095	0.0967652	0.013103	0.00758233			0.01	0	0.02
KH180126	WB1026	petrous bone	Warburg IV	daSilvaGenomeBiology2025	7822731	70.5065	0.177686	8.12541	2129	361683	2218	200400	0.906935	0.8529-0.9609	0.0061	0.0059-0.0063	F	..	K2a11	0.0846502	0.0129909	0.00729127	0.0833071	0.0130923	0.00749651			0.02	0.01	0.03
KH180127	WB1027	petrous bone	Warburg IV	this study	3452095	63.2622	0.070439	5.23097	1411	83412	8698	96240	0.466294	0.4456-0.4869	0.0944	0.0924-0.0964	M	I	..	0.147756	0.0143336	0.00829524	0.136534	0.0135686	0.00803699	0	0	0.02	0.01	0.03
KH210987	Kiel Ind 1	petrous bone	Züschen	this study	1201591	54.6683	0.021161	1.40171	435	29818	3048	29151	0.479909	0.4589-0.5009	0.0927	0.0896-0.0958	M	I	H1c	0.0837442	0.0149931	0.0100355	0.0840798	0.0142156	0.0095449	0	0	0.05	0	0.1
KH210990	Kiel Ind 4	petrous bone	Züschen	this study	1326003	54.0164	0.023103	1.225	369	62137	543	32082	0.924879	0.8842-0.9655	0.0087	0.0079-0.0095	F	..	..	0.0747848	0.0154538	0.0095953	0.0728584	0.0149576	0.00949346
KH210991	Kiel Ind 5	petrous bone	Züschen	this study	10123731	52.6652	0.172151	15.4064	4846	255006	25214	229841	0.496316	0.4719-0.5208	0.09	0.089-0.091	M	G	U5b2a1a	0.0975441	0.0138179	0.00835782	0.0941501	0.0132052	0.00798651	-0.003573	0.00261113	0.01	0	0.02
KH210992	Kiel Ind 6	petrous bone	Züschen	this study	7233267	57.5908	0.134387	11.3692	3403	173324	18179	172726	0.462577	0.442-0.4832	0.0949	0.0935-0.0963	M	I2c	J1c3	0.0840112	0.0157752	0.011071	0.0828394	0.0154192	0.0106769	-0.004052	0	0.01	0	0.02
KH211003	Kiel Ind 7	petrous bone	Züschen	this study	2506954	45.2062	0.036626	1.89076	708	60715	6037	52268	0.472121	0.451-0.4933	0.0904	0.0882-0.0926	M	I	..	0.149714	0.0161449	0.00891529	0.14691	0.016045	0.00893199	0	0	0.01	0	0.02
KH211004	Kiel Ind 8	petrous bone	Züschen	this study	1764911	52.3239	0.029914	2.4943	758	42954	4269	43561	0.470683	0.4496-0.4918	0.0904	0.0879-0.0929	M	I2c1a1	J1c1	0.0937237	0.0143473	0.00954139	0.0913968	0.0145371	0.00956436	-0.067536	0	0.01	0	0.02

## Sheet: Sup Table 2 - qpAdm
Supplementary Table 2. qpAdm modeling of individual samples using two sources: Western hunter-gatherers (WHG) and early farmers (EF). The following groups were combined to represent the WHG source: 'Luxembourg_Mesolithic.DG', 'Germany_Mesolithic.AG', and 'France_Mesolithic.AG'. The following groups were combined to represent the EF ancestry: 'Turkey_Marmara_Barcin_N.AG' and 'Turkey_Marmara_Mentes…
Group ID	target	snps used	rank	tail probability	chisquare	feasibility	EF proportion	EF_stderr	WHG proportion	WHG stderr
Germany_Altendorf	KH180054	251095	2	0.741251	3.52		0.698	0.026	0.302	0.026
Germany_Altendorf	KH180056	128567	2	0.476085	5.545		0.558	0.034	0.442	0.034
Germany_Altendorf	KH180057	66992	2	0.23976	7.977		0.678	0.058	0.322	0.058
Germany_Altendorf	KH180058	297766	2	0.896166	2.242		0.726	0.023	0.274	0.023
Germany_Altendorf	KH180059	97155	2	0.886605	2.334		0.548	0.041	0.452	0.041
Germany_Altendorf	KH180131	207189	2	0.370937	6.487		0.681	0.03	0.319	0.03
Germany_Altendorf	KH180135_KH180136	284049	2	0.436529	5.882		0.689	0.026	0.311	0.026
Germany_Altendorf	KH180137_KH182329	136099	2	0.039924	13.203		0.628	0.036	0.372	0.036
Germany_Altendorf	KH180139_KH180140	232585	2	0.114286	10.256		0.69	0.027	0.31	0.027
Germany_Altendorf	KH180149	72390	2	0.152107	9.404		0.668	0.052	0.332	0.052
Germany_Altendorf	KH180150_KH180151	268128	2	0.982148	1.086		0.692	0.027	0.308	0.027
Germany_Altendorf	KH180152	164972	2	0.663643	4.096		0.659	0.03	0.341	0.03
Germany_Altendorf	KH180153_KH180154	164112	2	0.341705	6.78		0.688	0.031	0.312	0.031
Germany_Altendorf	KH180158	55969	2	0.289379	7.354		0.73	0.083	0.27	0.083
Germany_Altendorf	KH180159	302154	2	0.00206	20.72		0.616	0.025	0.384	0.025
Germany_Altendorf	KH180160_KH180161	65065	2	0.5765	4.748		0.617	0.058	0.383	0.058
Germany_Altendorf	KH180162	92056	2	0.209773	8.407		0.659	0.043	0.341	0.043
Germany_Altendorf	KH180163	62109	2	0.339323	6.804		0.619	0.066	0.381	0.066
Germany_Altendorf	KH180820_KH180821	62738	2	0.080196	11.277		0.485	0.067	0.515	0.067
Germany_Altendorf	KH180827_KH180828	72664	2	0.336026	6.839		0.628	0.056	0.372	0.056
Germany_Altendorf	KH180831_KH180832	66365	2	0.733242	3.58		0.759	0.061	0.241	0.061
Germany_Altendorf	KH180833	58852	2	0.649285	4.203		0.682	0.079	0.318	0.079
Germany_Altendorf	KH180858	61487	2	0.651234	4.188		0.708	0.069	0.292	0.069
Germany_Altendorf	KH180873_KH180874	66928	2	0.432408	5.918		0.721	0.057	0.279	0.057
Germany_Altendorf	KH180875	57123	2	0.751441	3.444		0.627	0.082	0.373	0.082
Germany_Altendorf	KH180877	65077	2	0.887733	2.323		0.667	0.069	0.333	0.069
Germany_Altendorf	KH180879_KH180880_KH182328	108771	2	0.662259	4.107		0.737	0.04	0.263	0.04
Germany_Altendorf	KH180884	58453	2	0.843638	2.715		0.595	0.081	0.405	0.081
Germany_Niedertiefenbach	KH150189_KH150632_KH150636	577008	2	0.54415	4.997		0.55	0.023	0.45	0.023
Germany_Niedertiefenbach	KH150190	347819	2	0.665187	4.085		0.735	0.024	0.265	0.024
Germany_Niedertiefenbach	KH150191_KH150417	177336	2	0.483816	5.481		0.705	0.028	0.295	0.028
Germany_Niedertiefenbach	KH150193_KH150286	380163	2	0.16206	9.211		0.685	0.023	0.315	0.023
Germany_Niedertiefenbach	KH150195_KH150196_KH150616	459413	2	0.664933	4.087		0.661	0.022	0.339	0.022
Germany_Niedertiefenbach	KH150197	214261	2	0.771803	3.289		0.61	0.027	0.39	0.027
Germany_Niedertiefenbach	KH150198	176229	2	0.369239	6.503		0.625	0.029	0.375	0.029
Germany_Niedertiefenbach	KH150200	347123	2	0.546503	4.979		0.583	0.025	0.417	0.025
Germany_Niedertiefenbach	KH150203_KH150290	320443	2	0.308653	7.134		0.628	0.023	0.372	0.023
Germany_Niedertiefenbach	KH150204_KH150634	591408	2	0.1257	9.975		0.747	0.022	0.253	0.022
Germany_Niedertiefenbach	KH150208_KH150210	313391	2	0.372174	6.475		0.706	0.023	0.294	0.023
Germany_Niedertiefenbach	KH150287	215047	2	0.161248	9.226		0.598	0.028	0.402	0.028
Germany_Niedertiefenbach	KH150289	219660	2	0.821207	2.901		0.625	0.026	0.375	0.026
Germany_Niedertiefenbach	KH150418	280467	2	0.145003	9.548		0.629	0.024	0.371	0.024
Germany_Niedertiefenbach	KH150419	119021	2	0.325915	6.946		0.68	0.034	0.32	0.034
Germany_Niedertiefenbach	KH150422	226470	2	0.576865	4.745		0.437	0.026	0.563	0.026
Germany_Niedertiefenbach	KH150610	586339	2	0.008615	17.189		0.701	0.022	0.299	0.022
Germany_Niedertiefenbach	KH150612	590136	2	0.588822	4.655		0.608	0.023	0.392	0.023
Germany_Niedertiefenbach	KH150613_KH180043	573700	2	0.717469	3.698		0.651	0.021	0.349	0.021
Germany_Niedertiefenbach	KH150614_KH150615	591343	2	0.118089	10.16		0.626	0.022	0.374	0.022
Germany_Niedertiefenbach	KH150618	449689	2	0.661807	4.11		0.688	0.023	0.312	0.023
Germany_Niedertiefenbach	KH150619	584315	2	0.44173	5.837		0.622	0.022	0.378	0.022
Germany_Niedertiefenbach	KH150620	591702	2	0.638439	4.283		0.645	0.023	0.355	0.023
Germany_Niedertiefenbach	KH150621	108444	2	0.464813	5.639		0.706	0.04	0.294	0.04
Germany_Niedertiefenbach	KH150622	591872	2	0.195883	8.624		0.664	0.023	0.336	0.023
Germany_Niedertiefenbach	KH150623	592019	2	0.083582	11.159		0.65	0.023	0.35	0.023
Germany_Niedertiefenbach	KH150625	149313	2	0.819177	2.917		0.671	0.034	0.329	0.034
Germany_Niedertiefenbach	KH150626	411115	2	0.551553	4.94		0.709	0.022	0.291	0.022
Germany_Niedertiefenbach	KH150627	580731	2	0.023923	14.565		0.511	0.022	0.489	0.022
Germany_Niedertiefenbach	KH150628	271111	2	0.54359	5.002		0.69	0.025	0.31	0.025
Germany_Niedertiefenbach	KH150629	588005	2	0.180701	8.876		0.665	0.023	0.335	0.023
Germany_Niedertiefenbach	KH150630	587858	2	0.129961	9.876		0.667	0.021	0.333	0.021
Germany_Niedertiefenbach	KH150633	529806	2	0.761452	3.368		0.68	0.022	0.32	0.022
Germany_Niedertiefenbach	KH150635	591562	2	0.28237	7.436		0.676	0.022	0.324	0.022
Germany_Niedertiefenbach	KH150637	569332	2	0.36866	6.509		0.664	0.023	0.336	0.023
Germany_Niedertiefenbach	KH150639	354377	2	0.673876	4.021		0.687	0.024	0.313	0.024
Germany_Niedertiefenbach	KH150640	442044	2	0.877432	2.419		0.666	0.023	0.334	0.023
Germany_Niedertiefenbach	KH150641	545449	2	0.260922	7.7		0.644	0.022	0.356	0.022
Germany_Niedertiefenbach	KH180044	87829	2	0.471594	5.582		0.702	0.047	0.298	0.047
Germany_Niedertiefenbach	KH180045	102060	2	0.761176	3.37		0.437	0.042	0.563	0.042
Germany_Rimbeck	KH180390	358579	2	0.108197	10.416		0.599	0.025	0.401	0.025
Germany_Rimbeck	KH180391	166330	2	0.731168	3.596		0.641	0.029	0.359	0.029
Germany_Sorsum	KH170035_KH210851	130230	2	0.898675	2.217		0.692	0.033	0.308	0.033
Germany_Sorsum	KH170066	179509	2	0.055617	12.299		0.649	0.03	0.351	0.03
Germany_Sorsum	KH170073	65032	2	0.740283	3.528		0.712	0.072	0.288	0.072
Germany_Sorsum	KH210837	120164	2	0.202776	8.515		0.7	0.033	0.3	0.033
Germany_Sorsum	KH210846	83866	2	0.081788	11.221		0.718	0.045	0.282	0.045
Germany_Sorsum	KH210847	64773	2	0.045737	12.835		0.622	0.058	0.378	0.058
Germany_Sorsum	KH210848	91301	2	0.243125	7.932		0.722	0.042	0.278	0.042
Germany_Sorsum	KH210849_KH220441	150202	2	0.03172	13.819		0.7	0.031	0.3	0.031
Germany_Sorsum	KH210850_KH210917	93309	2	0.019003	15.166		0.734	0.041	0.266	0.041
Germany_Sorsum	KH210852	101594	2	0.66418	4.092		0.691	0.038	0.309	0.038
Germany_Sorsum	KH210853	95199	2	0.077874	11.36		0.709	0.043	0.291	0.043
Germany_Sorsum	KH210854	154760	2	0.051662	12.502		0.623	0.032	0.377	0.032
Germany_Sorsum	KH210855	159060	2	0.57698	4.744		0.682	0.03	0.318	0.03
Germany_Sorsum	KH210856	142608	2	0.00172	21.157		0.641	0.033	0.359	0.033
Germany_Sorsum	KH210857	90495	2	0.079385	11.305		0.676	0.042	0.324	0.042
Germany_Sorsum	KH210858_KH210949	115613	2	0.019606	15.085		0.661	0.037	0.339	0.037
Germany_Sorsum	KH210860	61316	2	0.030563	13.918		0.616	0.062	0.384	0.062
Germany_Sorsum	KH210891	89340	2	0.161832	9.215		0.604	0.041	0.396	0.041
Germany_Sorsum	KH210893_KH210948	67609	2	0.721663	3.667		0.651	0.055	0.349	0.055
Germany_Sorsum	KH210896_KH220421	127542	2	0.739344	3.535		0.744	0.035	0.256	0.035
Germany_Sorsum	KH210897	69466	2	0.506675	5.294		0.582	0.061	0.418	0.061
Germany_Sorsum	KH210898	75832	2	0.473613	5.565		0.724	0.051	0.276	0.051
Germany_Sorsum	KH210899	144322	2	0.827493	2.849		0.663	0.032	0.337	0.032
Germany_Sorsum	KH210900	230413	2	0.189873	8.721		0.697	0.026	0.303	0.026
Germany_Sorsum	KH210901	61229	2	0.00397	19.117		0.566	0.07	0.434	0.07
Germany_Sorsum	KH210902	116872	2	0.546142	4.982		0.635	0.037	0.365	0.037
Germany_Sorsum	KH210904	81683	2	0.293536	7.305		0.517	0.047	0.483	0.047
Germany_Sorsum	KH210908	120422	2	0.002738	20.028		0.639	0.037	0.361	0.037
Germany_Sorsum	KH210909	73175	2	0.000494	24.133		0.701	0.053	0.299	0.053
Germany_Sorsum	KH210913	56202	2	0.16924	9.078		0.691	0.084	0.309	0.084
Germany_Sorsum	KH210914	96214	2	0.100204	10.639		0.612	0.04	0.388	0.04
Germany_Sorsum	KH210915	113896	2	0.916376	2.036		0.645	0.036	0.355	0.036
Germany_Sorsum	KH210919	59941	2	0.302632	7.201		0.717	0.075	0.283	0.075
Germany_Sorsum	KH210920	56717	2	0.166489	9.128		0.649	0.081	0.351	0.081
Germany_Sorsum	KH210921	61816	2	0.483686	5.482		0.732	0.065	0.268	0.065
Germany_Sorsum	KH210923	107929	2	0.37707	6.427		0.608	0.038	0.392	0.038
Germany_Sorsum	KH210924	80087	2	0.003948	19.131		0.609	0.049	0.391	0.049
Germany_Sorsum	KH210925_KH210941	115756	2	0.193118	8.668		0.738	0.037	0.262	0.037
Germany_Sorsum	KH210928_KH210942	123539	2	0.331561	6.886		0.707	0.033	0.293	0.033
Germany_Sorsum	KH210929	118202	2	0.184045	8.819		0.645	0.036	0.355	0.036
Germany_Sorsum	KH210930_KH210945	144882	2	0.427928	5.958		0.671	0.031	0.329	0.031
Germany_Sorsum	KH210931	126468	2	0.009031	17.07		0.69	0.034	0.31	0.034
Germany_Sorsum	KH210933	87153	2	0.267855	7.613		0.665	0.043	0.335	0.043
Germany_Sorsum	KH210934	67727	2	0.569181	4.804		0.68	0.055	0.32	0.055
Germany_Sorsum	KH210936	112855	2	0.683596	3.949		0.678	0.036	0.322	0.036
Germany_Sorsum	KH210939	78229	2	0.892663	2.276		0.662	0.048	0.338	0.048
Germany_Sorsum	KH210943	65911	2	0.265395	7.644		0.736	0.058	0.264	0.058
Germany_Sorsum	KH210946	67819	2	0.381101	6.389		0.588	0.054	0.412	0.054
Germany_Sorsum	KH210947	79370	2	0.221339	8.236		0.598	0.045	0.402	0.045
Germany_Sorsum	KH210954	93986	2	0.598095	4.585		0.66	0.042	0.34	0.042
Germany_Sorsum	KH210955	56720	2	0.87552	2.436		0.751	0.083	0.249	0.083
Germany_Sorsum	KH210956	68716	2	0.90307	2.173		0.691	0.057	0.309	0.057
Germany_Sorsum	KH210957	154585	2	0.055406	12.31		0.666	0.032	0.334	0.032
Germany_Sorsum	KH220423	57310	2	0.011134	16.539		0.752	0.087	0.248	0.087
Germany_Sorsum	KH220427	64627	2	0.43522	5.894		0.606	0.063	0.394	0.063
Germany_Sorsum	KH220443	65379	2	0.765163	3.34		0.606	0.067	0.394	0.067
Germany_Warburg	KH180066	221685	2	0.149779	9.451		0.71	0.028	0.29	0.028
Germany_Warburg	KH180068	163533	2	0.095537	10.776		0.668	0.033	0.332	0.033
Germany_Warburg	KH180070	60971	2	0.640093	4.271		0.622	0.07	0.378	0.07
Germany_Warburg	KH180071	423768	2	0.009543	16.93		0.634	0.023	0.366	0.023
Germany_Warburg	KH180072	79109	2	0.286195	7.391		0.693	0.051	0.307	0.051
Germany_Warburg	KH180075	102472	2	0.087697	11.022		0.665	0.04	0.335	0.04
Germany_Warburg	KH180076	74269	2	0.124776	9.997		0.549	0.055	0.451	0.055
Germany_Warburg	KH180077	133996	2	0.503896	5.317		0.693	0.033	0.307	0.033
Germany_Warburg	KH180078	327806	2	0.094721	10.801		0.656	0.025	0.344	0.025
Germany_Warburg	KH180084	95866	2	0.607152	4.516		0.623	0.043	0.377	0.043
Germany_Warburg	KH180085	78156	2	0.069324	11.687		0.685	0.052	0.315	0.052
Germany_Warburg	KH180086	326940	2	0.028908	14.066		0.656	0.024	0.344	0.024
Germany_Warburg	KH180087	142769	2	0.791193	3.139		0.687	0.032	0.313	0.032
Germany_Warburg	KH180088	67258	2	0.806512	3.019		0.649	0.065	0.351	0.065
Germany_Warburg	KH180089	123523	2	0.193149	8.668		0.645	0.038	0.355	0.038
Germany_Warburg	KH180090	184931	2	0.359454	6.6		0.602	0.03	0.398	0.03
Germany_Warburg	KH180091	152318	2	0.274579	7.53		0.678	0.031	0.322	0.031
Germany_Warburg	KH180092_KH201271	104945	2	0.392344	6.282		0.585	0.04	0.415	0.04
Germany_Warburg	KH180094	104435	2	0.42404	5.992		0.694	0.04	0.306	0.04
Germany_Warburg	KH180095_KH210417_KH210433	93306	2	0.324601	6.96		0.611	0.043	0.389	0.043
Germany_Warburg	KH180119	105902	2	0.598848	4.579		0.643	0.043	0.357	0.043
Germany_Warburg	KH180120	107032	2	0.523389	5.161		0.606	0.039	0.394	0.039
Germany_Warburg	KH180121	299862	2	0.376312	6.435		0.623	0.027	0.377	0.027
Germany_Warburg	KH180122	77136	2	0.421574	6.014		0.694	0.052	0.306	0.052
Germany_Warburg	KH180123	153193	2	0.188682	8.741		0.666	0.033	0.334	0.033
Germany_Warburg	KH180126	142557	2	0.720711	3.674		0.733	0.033	0.267	0.033
Germany_Warburg	KH180127	91920	2	0.764256	3.347		0.653	0.043	0.347	0.043
Germany_Warburg	KH200127_KH200128_KH201232	520563	2	0.031617	13.828		0.69	0.023	0.31	0.023
Germany_Warburg	KH200132	88330	2	0.270188	7.584		0.623	0.047	0.377	0.047
Germany_Warburg	KH200133	91992	2	0.007355	17.586		0.637	0.047	0.363	0.047
Germany_Warburg	KH200134_KH201258	137820	2	0.712499	3.735		0.668	0.035	0.332	0.035
Germany_Warburg	KH200137_KH200219	81938	2	0.975969	1.218		0.677	0.047	0.323	0.047
Germany_Warburg	KH200140	56919	2	0.44121	5.841		0.719	0.084	0.281	0.084
Germany_Warburg	KH200150	58507	2	0.672481	4.031		0.536	0.078	0.464	0.078
Germany_Warburg	KH200153	90708	2	0.523516	5.16		0.679	0.048	0.321	0.048
Germany_Warburg	KH200155	116765	2	0.429766	5.942		0.741	0.035	0.259	0.035
Germany_Warburg	KH200159	78007	2	0.347629	6.719		0.657	0.053	0.343	0.053
Germany_Warburg	KH200165	62820	2	0.361344	6.581		0.665	0.071	0.335	0.071
Germany_Warburg	KH200166	86419	2	0.416904	6.056		0.677	0.045	0.323	0.045
Germany_Warburg	KH200169	57039	2	0.984223	1.036		0.691	0.084	0.309	0.084
Germany_Warburg	KH200172	70502	2	0.72469	3.644		0.675	0.055	0.325	0.055
Germany_Warburg	KH200179	70691	2	0.553977	4.921		0.647	0.06	0.353	0.06
Germany_Warburg	KH200185	63605	2	0.660286	4.121		0.687	0.073	0.313	0.073
Germany_Warburg	KH200191	87901	2	0.399366	6.217		0.607	0.045	0.393	0.045
Germany_Warburg	KH200192	59672	2	0.528993	5.116		0.64	0.07	0.36	0.07
Germany_Warburg	KH200194	83160	2	0.088149	11.007		0.731	0.046	0.269	0.046
Germany_Warburg	KH200197	89493	2	0.05124	12.524		0.622	0.045	0.378	0.045
Germany_Warburg	KH200200	81006	2	0.879849	2.397		0.54	0.05	0.46	0.05
Germany_Warburg	KH200201	65217	2	0.173544	9.001		0.636	0.071	0.364	0.071
Germany_Warburg	KH200210	89923	2	0.022169	14.765		0.672	0.047	0.328	0.047
Germany_Warburg	KH200229	114414	2	0.682476	3.957		0.68	0.038	0.32	0.038
Germany_Warburg	KH200230_KH201255	94765	2	0.763625	3.351		0.641	0.043	0.359	0.043
Germany_Warburg	KH200231	96667	2	0.495353	5.386		0.664	0.041	0.336	0.041
Germany_Warburg	KH200233	79174	2	0.020565	14.961		0.69	0.05	0.31	0.05
Germany_Warburg	KH200234	93959	2	0.797442	3.09		0.623	0.044	0.377	0.044
Germany_Warburg	KH200235	63675	2	0.777407	3.246		0.684	0.066	0.316	0.066
Germany_Warburg	KH200236	105761	2	0.762584	3.359		0.674	0.04	0.326	0.04
Germany_Warburg	KH201249	64518	2	0.38689	6.333		0.776	0.066	0.224	0.066
Germany_Warburg	KH201254	56899	2	0.69088	3.895		0.731	0.082	0.269	0.082
Germany_Warburg	KH201256	121379	2	0.693376	3.877		0.649	0.036	0.351	0.036
Germany_Warburg	KH201269	58207	2	0.536319	5.059		0.533	0.073	0.467	0.073
Germany_Warburg	KH201272	54997	2	0.074449	11.487		0.779	0.089	0.221	0.089
Germany_Warburg	KH201273	62184	2	0.382654	6.374		0.611	0.081	0.389	0.081
Germany_Warburg	KH201292_KH201346	322692	2	0.106212	10.47		0.653	0.025	0.347	0.025
Germany_Warburg	KH201307	63834	2	0.632043	4.331		0.646	0.077	0.354	0.077
Germany_Warburg	KH201322	73397	2	0.343418	6.762		0.652	0.053	0.348	0.053
Germany_Warburg	KH210310	64143	2	0.881959	2.377		0.649	0.068	0.351	0.068
Germany_Warburg	KH210314	56750	2	0.537536	5.049		0.75	0.084	0.25	0.084
Germany_Warburg	KH210316	57945	2	0.252355	7.81		0.692	0.083	0.308	0.083
Germany_Warburg	KH210412	70884	2	0.931451	1.868		0.745	0.053	0.255	0.053
Germany_Warburg	KH210418	63180	2	0.953929	1.581		0.579	0.066	0.421	0.066
Germany_Zuschen	KH210987	59011	2	0.864369	2.536		0.587	0.08	0.413	0.08
Germany_Zuschen	KH210990	60725	2	0.775512	3.261		0.641	0.071	0.359	0.071
Germany_Zuschen	KH210991	154722	2	0.755875	3.41		0.629	0.032	0.371	0.032
Germany_Zuschen	KH210992	129171	2	0.935263	1.823		0.716	0.036	0.284	0.036
Germany_Zuschen	KH211003	70907	2	0.68597	3.931		0.644	0.057	0.356	0.057
Germany_Zuschen	KH211004	66692	2	0.606459	4.522		0.731	0.058	0.269	0.058

## Sheet: Sup Table 3 - Kinship
Supplementary Table 3. Kinship estimates from READ, KIN, and NGSRelate2 for first- to third-degree. Information from ancIBD is also provided for pairs where both individuals had sufficient coverage (mean depth >0.1X)
Summary				READ											KIN												NGSrelate2
Pair of individuals	majority call	lines of evidence	Same site?	Rel	Zup	Zdown	P0_mean	Nonnormalized_P0	Nonnormalized_P0_serr	1st_Type	Perc_Win_1stdeg_P0	OverlapNSNPs	NSNPsXNorm	KinshipCoefficient	Relatedness	Second Guess	Log Likelihood Ratio	Within Degree Second Guess	Within Degree Log Likelihood Ratio	k0	k1	k2	IBD Length	IBD Number	phi	pihat	kinship_rab	1st_degree_type	nSites	J9	J8	J7	J6	J5	J4	J3	J2	J1	k0	k1	k2	rab	Fa	Fb	theta	inbred_relatedness_1_2	inbred_relatedness_2_1	fraternity	identity
KH170035_KH210851&KH170066	Second Degree	2	True	Second Degree	5.37412	2.21984	0.839905	0.230337	0.0033856		0.469512	43393	11900.2	0.160095	Second Degree	Third Degree	9.148			0.425	0.575	0	163	14	0.2875	0.2875	Unrelated		2933	0.94203	0.00116	0.022792	0	0	0	0.034018	0	0	0.94203	0.00116	0.022792	0.048886	0.034018	0	0.028695	0.017009	0	0.022792	0
KH170035_KH210851&KH210849_KH220441	Second Degree	2	True	Second Degree	3.34916	3.66293	0.861473	0.236251	0.00366655		0.493902	59170	16226.9	0.138527	Second Degree	Third Degree	7.526			0.53	0.47	0	129	24	0.235	0.235	Third Degree		9142	0.777582	0.212948	0.009412	0	0	0	5.7e-05	1e-06	0	0.777582	0.212948	0.009412	0.115929	5.8e-05	1e-06	0.057972	2.9e-05	0	0.009413	0
KH170035_KH210851&KH210850_KH210917	Second Degree	2	True	Second Degree	3.1841	3.0268	0.858188	0.235351	0.00413952		0.554878	38483	10553.6	0.141812	Second Degree	Third Degree	4.025			0.531	0.469	0	142	10	0.2345	0.2345	Third Degree		7530	0.70828	0.291657	5.8e-05	0	0	0	0	0	4e-06	0.70828	0.291657	5.8e-05	0.145891	4e-06	4e-06	0.072948	4e-06	4e-06	5.8e-05	4e-06
KH170035_KH210851&KH210860	First Degree	2	True	First Degree	0.0342236	10.2747	0.811878	0.22265	0.00498792		0.635802	18940	5194.13	0.188122	Siblings	Second Degree	5.59	Parent-Child	33.904	0.39	0.423	0.187	105	17	0.3985	0.3985	Second Degree		4260	0.515066	0.370509	0.114305	0	0.000119	0	0	0	0	0.515066	0.370509	0.114305	0.299649	0	0.000119	0.149839	0	6e-05	0.114305	0
KH170035_KH210851&KH210946	First Degree	3	True	First Degree	3.66332	8.23299	0.754762	0.206987	0.00432237		0.376543	19837	5440.13	0.245238	Parent-Child	Second Degree	21.162	Siblings	35.5416	0	1	0	287	1	0.5	0.5	First Degree		4096	0.17428	0.758311	1e-06	1.1e-05	0.064864	0	0.00114	0	0.001394	0.17428	0.758311	1e-06	0.430053	0.002533	0.066269	0.223974	0.001964	0.033826	1e-06	0.001394
KH170035_KH210851&KH210957	Second Degree	2	True	Second Degree	2.50638	5.44849	0.876712	0.240431	0.003232		0.539877	49873	13677.2	0.123288	Second Degree	Third Degree	10.48			0.522	0.478	0	135	25	0.239	0.239	Unrelated		6237	0.913755	0.052945	0.032412	0	0	6.3e-05	1.7e-05	4e-06	0.000804	0.913755	0.052945	0.032412	0.059701	0.000888	0.000808	0.030254	0.000812	0.000804	0.032416	0.000804
KH170066&KH210837	Second Degree	2	True	Second Degree	4.79288	1.81322	0.838232	0.229878	0.00389188		0.402439	39099	10722.6	0.161768	Second Degree	Third Degree	11.219			0.447	0.553	0	159	21	0.2765	0.2765	Third Degree		4910	0.774128	0.225817	4.1e-05	0	0	1e-05	2e-06	0	2e-06	0.774128	0.225817	4.1e-05	0.112953	1.4e-05	2e-06	0.056478	3e-06	2e-06	4.1e-05	2e-06
KH170066&KH210849_KH220441	First Degree	3	True	First Degree	10.3856	4.63853	0.682888	0.187276	0.00342251	Siblings	0.484663	53648	14712.5	0.317112	Siblings	Second Degree	34.432	Parent-Child	15.1096	0.136	0.594	0.27	196	25	0.567	0.567	First Degree		4329	0.603603	0.008773	0.387539	0	0	0	8.5e-05	0	0	0.603603	0.008773	0.387539	0.391989	8.5e-05	0	0.196005	4.3e-05	0	0.387539	0
KH170066&KH210852	First Degree	2	True	First Degree	5.6445	8.89971	0.739733	0.202865	0.00353545		0.331288	29246	8020.47	0.260267	Parent-Child	Second Degree	27.713	Siblings	44.4141	0	1	0	288	1	0.5	0.5	Second Degree		3667	0.387701	0.580551	0	0	1e-06	2e-06	0.03174	0	4e-06	0.387701	0.580551	0	0.314085	0.031746	5e-06	0.161012	0.015874	4e-06	0	4e-06
KH170066&KH210908	Second Degree	2	True	Second Degree	4.11195	3.30411	0.854269	0.234276	0.00346682		0.439024	39748	10900.5	0.145731	Second Degree	Third Degree	7.007			0.444	0.556	0	167	15	0.278	0.278	Third Degree		4631	0.847766	0.001478	0.15075	0	0	0	0	0	6e-06	0.847766	0.001478	0.15075	0.151495	6e-06	6e-06	0.07575	6e-06	6e-06	0.15075	6e-06
KH170066&KH210923	First Degree	2	True	First Degree	4.26459	11.8592	0.762908	0.209221	0.00318909		0.263804	33467	9178.04	0.237092	Parent-Child	Second Degree	24.41	Siblings	46.8608	0	1	0	288	1	0.5	0.5	Second Degree		4803	0.277818	0.721993	0.000185	0	0	0	0	0	3e-06	0.277818	0.721993	0.000185	0.361185	3e-06	3e-06	0.180594	3e-06	3e-06	0.000185	3e-06
KH170066&KH210957	First Degree	2	True	First Degree	10.107	5.4754	0.690884	0.189469	0.0032999	Siblings	0.490798	55703	15276.1	0.309116	Siblings	Second Degree	32.678	Parent-Child	19.184	0.138	0.572	0.29	186	20	0.576	0.576	Second Degree		3243	0.677802	0.001466	0.320732	0	0	0	0	0	0	0.677802	0.001466	0.320732	0.321465	0	0	0.160732	0	0	0.320732	0
KH210837&KH210849_KH220441	Second Degree	2	True	Second Degree	5.59776	2.42169	0.84081	0.230585	0.00320597		0.426829	78097	21417.4	0.15919	Second Degree	Third Degree	11.188			0.45	0.55	0	151	22	0.275	0.275	Third Degree		14462	0.706807	0.260597	0.032591	0	1e-06	1e-06	0	1e-06	0	0.706807	0.260597	0.032591	0.162891	3e-06	3e-06	0.081446	0	1e-06	0.032593	0
KH210837&KH210852	Second Degree	2	True	Second Degree	3.48643	4.02591	0.862741	0.236599	0.00342239		0.47561	62236	17067.7	0.137259	Second Degree	Third Degree	6.358			0.461	0.539	0	155	12	0.2695	0.2695	Third Degree		13095	0.637544	0.362182	0.00027	0	0	3e-06	0	0	2e-06	0.637544	0.362182	0.00027	0.181362	5e-06	2e-06	0.090682	2e-06	2e-06	0.00027	2e-06
KH210837&KH210860	Second Degree	2	True	Second Degree	0.162377	4.78041	0.90317	0.247687	0.00520155		0.54321	27450	7527.93	0.0968298	Second Degree	Third Degree	3.902			0.544	0.456	0	130	9	0.228	0.228	Third Degree		6229	0.784892	0.209553	0.005511	4.1e-05	0	0	0	4e-06	0	0.784892	0.209553	0.005511	0.110287	4e-06	4.5e-05	0.055144	0	0	0.005515	0
KH210837&KH210957	Second Degree	2	True	Second Degree	4.96216	3.56988	0.851726	0.233579	0.00301336		0.432927	58460	16032.2	0.148274	Second Degree	Third Degree	16.043			0.455	0.545	0	168	27	0.2725	0.2725	Third Degree		9667	0.698589	0.301263	0.000145	0	0	0	2e-06	0	1e-06	0.698589	0.301263	0.000145	0.150779	3e-06	1e-06	0.07539	2e-06	1e-06	0.000145	1e-06
KH210846&KH210854	Second Degree	3	True	Second Degree	5.52552	1.00966	0.826984	0.226793	0.00393411		0.506098	62859	17238.5	0.173016	Second Degree	Siblings	1.322			0.382	0.618	0	176	15	0.309	0.309	Second Degree		13388	0.699455	0.200716	0.099828	0	0	0	0	0	0	0.699455	0.200716	0.099828	0.200187	0	0	0.100093	0	0	0.099828	0
KH210846&KH210893_KH210948	Second Degree	2	True	Second Degree	2.01942	3.44569	0.871608	0.239031	0.00470442		0.5	28239	7744.3	0.128392	Second Degree	Third Degree	6.811			0.462	0.538	0	166	11	0.269	0.269	Unrelated		6478	0.911197	0.044344	0.044452	2e-06	0	0	0	5e-06	0	0.911197	0.044344	0.044452	0.066624	5e-06	6e-06	0.033312	0	0	0.044457	0
KH210846&KH210902	Second Degree	2	True	Second Degree	0.169771	7.48958	0.904172	0.247961	0.0033567		0.481707	54573	14966.2	0.095828	Second Degree	Third Degree	1.432			0.591	0.409	0	116	20	0.2045	0.2045	Third Degree		12197	0.771993	0.227826	0.000172	2e-06	5e-06	1e-06	0	0	1e-06	0.771993	0.227826	0.000172	0.11409	2e-06	8e-06	0.057046	1e-06	3e-06	0.000172	1e-06
KH210846&KH210921	Second Degree	2	True	Second Degree	1.6416	3.00705	0.873144	0.239452	0.00553067		0.560976	18108	4965.96	0.126856	Second Degree	Third Degree	2.639			0.537	0.463	0	119	10	0.2315	0.2315	Third Degree		4064	0.664851	0.186202	0.000151	0.106924	0.041872	0	0	1e-06	0	0.664851	0.186202	0.000151	0.124656	1e-06	0.148797	0.067562	0	0.020936	0.000151	0
KH210846&KH210925_KH210941	First Degree	2	True	First Degree	2.72524	11.7157	0.777116	0.213117	0.00356073	Siblings	0.496933	57649	15809.7	0.222884	Siblings	Second Degree	31.034	Parent-Child	35.735	0.28	0.502	0.219	160	31	0.47	0.47	Second Degree		12871	0.461134	0.352978	0.185885	0	0	0	0	2e-06	0	0.461134	0.352978	0.185885	0.362375	2e-06	2e-06	0.181187	0	0	0.185887	0
KH210846&KH210929	First Degree	2	True	First Degree	4.32582	12.6969	0.764853	0.209754	0.00302068	Parent-offspring	0.20122	58559	16059.3	0.235147	Parent-Child	Second Degree	25.25	Siblings	52.8621	0	1	0	288	1	0.5	0.5	Second Degree		12820	0.288241	0.711758	1e-06	0	0	0	0	0	0	0.288241	0.711758	1e-06	0.35588	0	0	0.17794	0	0	1e-06	0
KH210847&KH210924	Second Degree	3	True	Second Degree	1.86092	3.08188	0.870954	0.238852	0.00520153		0.582822	22537	6180.58	0.129046	Second Degree	Third Degree	5.735			0.468	0.532	0	143	7	0.266	0.266	Second Degree		5271	0.606056	0.245832	0.095756	7.6e-05	0.019506	0	0.031768	0	0.001007	0.606056	0.245832	0.095756	0.258134	0.032775	0.020589	0.13598	0.016891	0.01076	0.095756	0.001007
KH210848&KH210854	Second Degree	2	True	Second Degree	6.61036	0.72616	0.821779	0.225366	0.00350441		0.390244	57045	15644.1	0.178221	Second Degree	Third Degree	10.842			0.374	0.626	0	183	13	0.313	0.313	Third Degree		11375	0.66041	0.339576	1.3e-05	0	0	0	0	1e-06	0	0.66041	0.339576	1.3e-05	0.169801	1e-06	1e-06	0.0849	0	0	1.4e-05	0
KH210848&KH210858_KH210949	Second Degree	2	True	Second Degree	2.39377	4.62275	0.874266	0.23976	0.00366423		0.530488	48169	13209.9	0.125734	Second Degree	Third Degree	4.483			0.554	0.446	0	122	23	0.223	0.223	Third Degree		10507	0.809206	0.190758	3.5e-05	0	0	0	0	0	1e-06	0.809206	0.190758	3.5e-05	0.095415	1e-06	1e-06	0.047708	1e-06	1e-06	3.5e-05	1e-06
KH210848&KH210893_KH210948	Second Degree	3	True	Second Degree	3.49868	2.1416	0.848097	0.232583	0.00455831		0.512195	25019	6861.25	0.151903	Second Degree	Third Degree	10.341			0.382	0.618	0	195	8	0.309	0.309	Second Degree		5725	0.601221	0.390336	0	0	0	0	0.008441	0	3e-06	0.601221	0.390336	0	0.201501	0.008443	3e-06	0.101807	0.004223	3e-06	0	3e-06
KH210848&KH210899	First Degree	3	True	First Degree	6.91272	9.48174	0.733441	0.20114	0.00313644	Parent-offspring	0.280488	53341	14628.3	0.266559	Parent-Child	Second Degree	33.067	Siblings	53.7529	0	1	0	288	1	0.5	0.5	First Degree	Parent-offspring	11202	0.087798	0.911991	0.00021	0	0	0	0	1e-06	0	0.087798	0.911991	0.00021	0.456205	1e-06	1e-06	0.228103	0	0	0.000211	0
KH210848&KH210924	Third Degree	2	True	Third Degree	2.21575	1.62772	0.932719	0.25579	0.00445953		0.736196	33289	9129.22	0.067281	Third Degree	Unrelated	1.047			0.786	0.214	0	43	7	0.107	0.107	Unrelated		7436	0.93439	9.6e-05	0	0.000402	0.065112	0	0	0	0	0.93439	9.6e-05	0	0.048882	0	0.065513	0.03258	0	0.032556	0	0
KH210848&KH210925_KH210941	Third Degree	2	True	Third Degree	4.08449	0.407236	0.911916	0.250085	0.00381592		0.615854	49827	13664.6	0.0880835	Third Degree	Second Degree	1.143			0.659	0.341	0	99	10	0.1705	0.1705	Unrelated		10903	0.98137	0.018475	0.000124	0	0	2.6e-05	3e-06	2e-06	0	0.98137	0.018475	0.000124	0.009363	3.1e-05	2e-06	0.004682	1e-06	0	0.000126	0
KH210848&KH210928_KH210942	Third Degree	2	True	Third Degree	2.31455	2.36147	0.937814	0.257187	0.00366553		0.670732	50714	13907.9	0.0621864	Third Degree	Unrelated	1.055			0.757	0.243	0	48	8	0.1215	0.1215	Unrelated		10955	1	0	0	0	0	0	0	0	0	1	0	0	3.2e-05	1.2e-05	2e-06	1.6e-05	0	1e-06	0	0
KH210848&KH210929	First Degree	3	True	First Degree	5.59889	9.05925	0.740882	0.20318	0.00350797		0.304878	50433	13830.8	0.259118	Parent-Child	Second Degree	26.916	Siblings	45.4349	0	1	0	288	1	0.5	0.5	First Degree		10834	0.195461	0.804534	4e-06	0	0	0	0	0	0	0.195461	0.804534	4e-06	0.402272	0	0	0.201136	0	0	4e-06	0
KH210848&KH220423	Second Degree	2	True	Second Degree	1.71944	0.623993	0.837463	0.229667	0.0109711		0.708861	2373	650.775	0.162537	Second Degree	Third Degree	2.09			0.494	0.506	0	135	2	0.253	0.253	filteredout		296	0	0	0	1	0	0	0	0	0	0	0	0	3e-06	4e-06	0.999756	2e-06	2e-06	0	0	0
KH210849_KH220441&KH210850_KH210917	Third Degree	2	True	Third Degree	4.9382	0.412371	0.911067	0.249852	0.00320342		0.597561	52475	14390.8	0.0889331	Third Degree	Unrelated	2.984			0.717	0.283	0	74	10	0.1415	0.1415	Unrelated		10199	0.914541	0.085405	5.1e-05	1e-06	0	0	0	2e-06	0	0.914541	0.085405	5.1e-05	0.042753	2e-06	4e-06	0.021377	0	0	5.3e-05	0
KH210849_KH220441&KH210852	First Degree	3	True	First Degree	6.27308	9.38893	0.737401	0.202226	0.00328312	Parent-offspring	0.243902	61728	16928.4	0.262599	Parent-Child	Second Degree	30.964	Siblings	52.2017	0	1	0	288	1	0.5	0.5	First Degree	Parent-offspring	11878	0.102846	0.897154	0	0	0	0	0	0	0	0.102846	0.897154	0	0.448577	0	0	0.224288	0	0	0	0
KH210849_KH220441&KH210860	First Degree	3	True	First Degree	3.12483	7.84783	0.759103	0.208178	0.00468621		0.388889	24604	6747.44	0.240897	Parent-Child	Second Degree	20.339	Siblings	33.3684	0	1	0	288	1	0.5	0.5	First Degree		5538	0.244233	0.755762	5e-06	0	0	0	0	0	0	0.244233	0.755762	5e-06	0.377886	0	0	0.188943	0	0	5e-06	0
KH210849_KH220441&KH210908	Second Degree	2	True	Second Degree	2.29837	5.15927	0.877357	0.240608	0.00344749		0.536585	69179	18971.7	0.122643	Second Degree	Third Degree	2.026			0.547	0.453	0	122	16	0.2265	0.2265	Third Degree		13006	0.71823	0.28116	0.00061	0	0	0	0	0	0	0.71823	0.28116	0.00061	0.14119	0	0	0.070595	0	0	0.00061	0
KH210849_KH220441&KH210923	Second Degree	2	True	Second Degree	1.30204	6.0062	0.889547	0.243951	0.00351797		0.52439	66083	18122.7	0.110453	Second Degree	Third Degree	3.234			0.578	0.422	0	121	19	0.211	0.211	Third Degree		13564	0.720351	0.279628	2.1e-05	0	0	0	0	0	0	0.720351	0.279628	2.1e-05	0.139835	0	0	0.069917	0	0	2.1e-05	0
KH210849_KH220441&KH210957	First Degree	2	True	First Degree	6.53166	7.21527	0.723412	0.19839	0.00374049	Siblings	0.469512	66193	18152.9	0.276588	Siblings	Second Degree	36.038	Parent-Child	19.8887	0.179	0.591	0.23	183	29	0.5255	0.5255	Second Degree		8809	0.43446	0.415823	0.149717	0	0	0	0	0	0	0.43446	0.415823	0.149717	0.357628	0	0	0.178814	0	0	0.149717	0
KH210850_KH210917&KH210856	Third Degree	2	True	Third Degree	3.49045	1.19624	0.922203	0.252906	0.00365719		0.615854	52130	14296.2	0.0777973	Third Degree	Unrelated	1.741			0.724	0.276	0	72	9	0.138	0.138	Unrelated		10344	0.892707	0.107089	0.000184	0	0	1.5e-05	0	0	5e-06	0.892707	0.107089	0.000184	0.053733	2e-05	5e-06	0.026869	5e-06	5e-06	0.000184	5e-06
KH210850_KH210917&KH210860	Second Degree	3	True	Second Degree	2.07036	2.90541	0.867242	0.237834	0.00516707		0.524691	20569	5640.87	0.132758	Second Degree	Third Degree	4.556			0.472	0.528	0	167	8	0.264	0.264	Second Degree		4762	0.659709	0.260862	0.079429	0	0	0	0	0	0	0.659709	0.260862	0.079429	0.20986	0	0	0.10493	0	0	0.079429	0
KH210850_KH210917&KH210957	Third Degree	2	True	Third Degree	4.06204	0.984997	0.918448	0.251876	0.00339607		0.546012	39170	10742	0.0815523	Third Degree	Unrelated	2.307			0.743	0.257	0	52	10	0.1285	0.1285	Unrelated		6726	1	0	0	0	0	0	0	0	0	1	0	0	5.2e-05	0	0	2.6e-05	0	0	0	0
KH210852&KH210923	Second Degree	2	True	Second Degree	0.670844	6.7164	0.897736	0.246197	0.00348034		0.506098	56922	15610.4	0.102264	Second Degree	Third Degree	4.114			0.533	0.467	0	140	8	0.2335	0.2335	Third Degree		12583	0.691884	0.307908	0.000202	0	2e-06	4e-06	1e-06	0	0	0.691884	0.307908	0.000202	0.154158	5e-06	2e-06	0.077079	0	1e-06	0.000202	0
KH210852&KH210957	First Degree	2	True	First Degree	5.87735	8.90074	0.73793	0.202371	0.00347949	Parent-offspring	0.231707	45382	12445.6	0.26207	Parent-Child	Second Degree	32.76	Siblings	51.4611	0	1	0	288	1	0.5	0.5	Second Degree		7764	0.252402	0.747586	1.2e-05	0	0	0	0	0	0	0.252402	0.747586	1.2e-05	0.373805	0	0	0.186903	0	0	1.2e-05	0
KH210854&KH210858_KH210949	Second Degree	2	True	Second Degree	2.7572	5.48808	0.8749	0.239934	0.00311816		0.52439	78680	21577.3	0.1251	Second Degree	Third Degree	8.541			0.526	0.474	0	137	25	0.237	0.237	Third Degree		15788	0.755683	0.244219	9.8e-05	0	0	0	0	0	0	0.755683	0.244219	9.8e-05	0.122207	0	0	0.061104	0	0	9.8e-05	0
KH210854&KH210893_KH210948	Third Degree	2	True	Third Degree	2.46426	1.60659	0.930916	0.255296	0.00421044		0.658537	34603	9489.58	0.0690839	Third Degree	Unrelated	2.053			0.743	0.257	0	62	7	0.1285	0.1285	Unrelated		7621	1	0	0	0	0	0	0	0	0	1	0	0	9e-06	0	0	5e-06	0	0	0	0
KH210854&KH210899	Third Degree	2	True	Third Degree	3.91641	1.40054	0.922713	0.253046	0.00322367		0.646341	92410	25342.7	0.0772868	Third Degree	Unrelated	2.097			0.734	0.266	0	62	12	0.133	0.133	Unrelated		17212	0.977202	0.015172	0.007624	0	0	0	0	0	2e-06	0.977202	0.015172	0.007624	0.015212	2e-06	2e-06	0.007607	2e-06	2e-06	0.007624	2e-06
KH210854&KH210902	Second Degree	2	True	Second Degree	1.6018	7.46668	0.889691	0.24399	0.00283511		0.47561	77954	21378.2	0.110309	Second Degree	Third Degree	4.722			0.554	0.446	0	123	21	0.223	0.223	Third Degree		15530	0.752634	0.247348	1.6e-05	0	0	0	0	1e-06	0	0.752634	0.247348	1.6e-05	0.12369	1e-06	1e-06	0.061845	0	0	1.7e-05	0
KH210854&KH210921	Third Degree	2	True	Third Degree	2.27911	0.911264	0.924102	0.253427	0.00537245		0.542683	23052	6321.81	0.0758981	Third Degree	Unrelated	1.604			0.753	0.247	0	33	5	0.1235	0.1235	Unrelated		4862	0.850717	0.000716	2.7e-05	0.124624	0.023917	0	0	0	0	0.850717	0.000716	2.7e-05	0.018322	0	0.148541	0.012151	0	0.011959	2.7e-05	0
KH210854&KH210925_KH210941	Second Degree	2	True	Second Degree	3.41254	4.13416	0.863857	0.236905	0.0034068		0.518293	81847	22445.8	0.136143	Second Degree	Siblings	5.813			0.445	0.555	0	156	23	0.2775	0.2775	Third Degree		16488	0.726543	0.226007	0.047447	0	0	0	0	3e-06	0	0.726543	0.226007	0.047447	0.16045	3e-06	3e-06	0.080225	0	0	0.04745	0
KH210854&KH210928_KH210942	Second Degree	2	True	Second Degree	0.227439	6.40149	0.903033	0.247649	0.00387848		0.530488	84971	23302.6	0.0969666	Second Degree	Third Degree	4.598			0.574	0.426	0	120	22	0.213	0.213	Unrelated		16794	0.863152	0.136808	3.9e-05	0	0	0	0	0	0	0.863152	0.136808	3.9e-05	0.068443	0	0	0.034222	0	0	3.9e-05	0
KH210854&KH210929	First Degree	3	True	First Degree	5.59723	14.0971	0.759212	0.208207	0.00261092	Parent-offspring	0.176829	82975	22755.2	0.240788	Parent-Child	Second Degree	29.694	Siblings	52.9601	0	1	0	288	1	0.5	0.5	First Degree		16246	0.226839	0.773145	1.5e-05	0	0	0	0	0	0	0.226839	0.773145	1.5e-05	0.386588	0	0	0.193294	0	0	1.5e-05	0
KH210854&KH220423	Second Degree	2	True	Second Degree	1.80437	1.50694	0.855165	0.234522	0.00776435		0.66875	5330	1461.71	0.144835	Second Degree	Third Degree	4.919			0.474	0.526	0	176	3	0.263	0.263	filteredout		443	6e-06	2e-06	0.001895	0.983949	0.014146	0	2e-06	0	0	6e-06	2e-06	0.001895	0.012507	2e-06	0.998095	0.008022	1e-06	0.007073	0.001895	0
KH210856&KH210860	Third Degree	2	True	Third Degree	2.60789	0.973157	0.923235	0.253189	0.00478634		0.617284	25712	7051.3	0.0767655	Third Degree	Unrelated	1.089			0.744	0.256	0	60	7	0.128	0.128	Unrelated		5817	0.866262	0.133688	0	4.6e-05	0	0	0	0	4e-06	0.866262	0.133688	0	0.066848	4e-06	4.9e-05	0.033426	4e-06	4e-06	0	4e-06
KH210856&KH210897	Second Degree	2	True	Second Degree	1.5734	4.43995	0.88172	0.241804	0.00427551		0.542683	35140	9636.84	0.11828	Second Degree	Third Degree	3.686			0.554	0.446	0	124	10	0.223	0.223	Third Degree		7854	0.665923	0.310517	0.023471	4.8e-05	1e-06	1e-06	0	1e-06	3.7e-05	0.665923	0.310517	0.023471	0.178768	3.9e-05	8.8e-05	0.089403	3.7e-05	3.8e-05	0.023472	3.7e-05
KH210856&KH210957	Third Degree	2	True	Third Degree	4.56901	0.670499	0.914248	0.250725	0.00327131		0.567073	63472	17406.7	0.0857519	Third Degree	Second Degree	2.888			0.714	0.286	0	78	13	0.143	0.143	Unrelated		8836	1	0	0	0	0	0	0	0	0	1	0	0	7.5e-05	0	0	3.8e-05	0	0	1.7e-05	0
KH210858_KH210949&KH210893_KH210948	First Degree	2	True	First Degree	2.85336	9.97185	0.770785	0.211381	0.00400931		0.256098	33986	9320.37	0.229215	Parent-Child	Second Degree	18.678	Siblings	42.0608	0	1	0	288	1	0.5	0.5	Second Degree		7675	0.320846	0.67914	1.4e-05	0	0	0	0	0	0	0.320846	0.67914	1.4e-05	0.339584	0	0	0.169792	0	0	1.4e-05	0
KH210858_KH210949&KH210909	Third Degree	2	True	Third Degree	1.70716	2.9608	0.945893	0.259403	0.00367186		0.707317	46395	12723.4	0.0541074	Third Degree	Unrelated	1.183			0.758	0.242	0	65	8	0.121	0.121	Unrelated		10777	0.917363	0.071231	0.011398	3e-06	5e-06	0	0	0	0	0.917363	0.071231	0.011398	0.047017	0	8e-06	0.023509	0	3e-06	0.011398	0
KH210858_KH210949&KH210929	First Degree	2	True	First Degree	1.90802	12.6664	0.787953	0.216089	0.00352811	Siblings	0.469512	75478	20699.2	0.212047	Siblings	Second Degree	11.418	Parent-Child	32.452	0.317	0.532	0.151	163	35	0.417	0.417	Second Degree		15896	0.529652	0.311317	0.159031	0	0	0	0	0	0	0.529652	0.311317	0.159031	0.31469	0	0	0.157345	0	0	0.159031	0
KH210858_KH210949&KH220423	Second Degree	2	True	Second Degree	0.624908	2.04868	0.884337	0.242522	0.00961632		0.786164	3410	935.163	0.115663	Second Degree	Third Degree	2.249			0.491	0.509	0	184	3	0.2545	0.2545	filteredout		390	0.000202	2.3e-05	0	0.880788	0.118987	0	0	0	1e-06	0.000202	2.3e-05	0	0.089252	1e-06	0.999776	0.0595	1e-06	0.059494	0	1e-06
KH210860&KH210908	Second Degree	3	True	Second Degree	0.790231	4.68727	0.892725	0.244822	0.00469377		0.524691	26652	7309.08	0.107275	Second Degree	Third Degree	2.666			0.544	0.456	0	121	9	0.228	0.228	Second Degree		6049	0.61771	0.382108	0.000179	0	0	2e-06	0	0	1e-06	0.61771	0.382108	0.000179	0.191234	3e-06	1e-06	0.095617	1e-06	1e-06	0.000179	1e-06
KH210860&KH210923	Third Degree	2	True	Third Degree	2.56914	1.18145	0.925938	0.253931	0.00456998		0.608696	28177	7727.3	0.0740623	Second Degree	Third Degree	0.554			0.568	0.432	0	133	9	0.216	0.216	Third Degree		6459	0.744367	0.250273	0.005358	0	0	0	0	0	2e-06	0.744367	0.250273	0.005358	0.130496	2e-06	2e-06	0.065249	2e-06	2e-06	0.005358	2e-06
KH210860&KH210946	Third Degree	2	True	Unrelated		0.752199	0.922766	0.253061	0.00602134		0.65625	12416	3404.98	0.0772344	Third Degree	Second Degree	1.675			0.699	0.301	0	60	4	0.1505	0.1505	Third Degree		2883	0.692353	0.197002	5.7e-05	0.110558	3e-05	0	0	0	0	0.692353	0.197002	5.7e-05	0.09858	0	0.110588	0.049294	0	1.5e-05	5.7e-05	0
KH210860&KH210957	First Degree	2	True	First Degree	2.06829	9.52265	0.779042	0.213646	0.00443624		0.354037	17969	4927.84	0.220958	Parent-Child	Second Degree	13.635	Siblings	22.6232	0	1	0	288	1	0.5	0.5	Second Degree		3757	0.331568	0.668427	0	0	0	0	0	0	5e-06	0.331568	0.668427	0	0.334218	5e-06	5e-06	0.167111	5e-06	5e-06	0	5e-06
KH210893_KH210948&KH210899	Third Degree	2	True	Third Degree	1.77627	2.33031	0.941716	0.258258	0.00417382		0.668712	36088	9896.83	0.0582839	Third Degree	Unrelated	2.584			0.729	0.271	0	76	7	0.1355	0.1355	Unrelated		8007	0.98381	0.001705	0.014484	0	0	0	0	1e-06	0	0.98381	0.001705	0.014484	0.015337	1e-06	1e-06	0.007668	0	0	0.014484	0
KH210893_KH210948&KH210909	Second Degree	2	True	Second Degree	2.11474	3.21742	0.869069	0.238335	0.0048217		0.549383	24067	6600.17	0.130931	Second Degree	Third Degree	2.528			0.48	0.52	0	153	8	0.26	0.26	Third Degree		5636	0.676818	0.315815	0.002664	0	0.00469	0	4e-06	0	8e-06	0.676818	0.315815	0.002664	0.164101	1.2e-05	0.004699	0.082641	1e-05	0.002354	0.002664	8e-06
KH210893_KH210948&KH210919	Second Degree	2	True	Second Degree	1.18958	2.4041	0.875217	0.240021	0.00715426		0.647799	7716	2116.05	0.124783	Second Degree	Third Degree	2.436			0.509	0.491	0	119	4	0.2455	0.2455	filteredout		1683	0.75527	0.000517	0.093641	0.150554	1.4e-05	0	0	0	5e-06	0.75527	0.000517	0.093641	0.093914	5e-06	0.150572	0.046961	5e-06	1.2e-05	0.093641	5e-06
KH210893_KH210948&KH210925_KH210941	Second Degree	2	True	Second Degree	2.36886	4.27793	0.872838	0.239368	0.00386805		0.496933	34708	9518.37	0.127162	Second Degree	Third Degree	3.623			0.511	0.489	0	138	16	0.2445	0.2445	Third Degree		7839	0.830973	0.146435	0.022586	0	0	6e-06	1e-06	0	0	0.830973	0.146435	0.022586	0.095804	7e-06	0	0.047902	0	0	0.022586	0
KH210893_KH210948&KH210928_KH210942	Third Degree	2	True	Third Degree	1.24285	3.04269	0.950624	0.260701	0.00399953		0.668712	34998	9597.9	0.0493756	Third Degree	Unrelated	1.324			0.76	0.24	0	63	5	0.12	0.12	Unrelated		7849	1	0	0	0	0	0	0	0	0	1	0	0	0.00011	1e-06	1e-06	5.5e-05	1e-06	1e-06	5.6e-05	1e-06
KH210893_KH210948&KH210929	First Degree	2	True	First Degree	1.80825	13.1453	0.789827	0.216603	0.00343866		0.347561	34150	9365.35	0.210173	Parent-Child	Second Degree	18.726	Siblings	35.024	0	1	0	288	1	0.5	0.5	Second Degree		7620	0.380209	0.61965	0.000141	0	0	0	0	0	0	0.380209	0.61965	0.000141	0.309966	1e-06	0	0.154983	0	0	0.000141	0
KH210893_KH210948&KH210933	Second Degree	2	True	Second Degree	1.36523	3.72071	0.881084	0.24163	0.00505515		0.560976	30137	8264.81	0.118916	Second Degree	Third Degree	2.02			0.536	0.464	0	126	14	0.232	0.232	Unrelated		6880	0.829975	0.166057	0.003968	0	0	0	0	0	0	0.829975	0.166057	0.003968	0.086997	0	0	0.043498	0	0	0.003968	0
KH210893_KH210948&KH210947	Third Degree	2	True	Third Degree	2.20091	0.844591	0.923583	0.253285	0.005628		0.625767	21920	6011.37	0.0764173	Third Degree	Second Degree	2.859			0.698	0.302	0	55	5	0.151	0.151	Unrelated		4953	0.803908	0.124845	0.030812	0.040434	0	0	0	0	1e-06	0.803908	0.124845	0.030812	0.093235	1e-06	0.040435	0.046618	1e-06	1e-06	0.030812	1e-06
KH210896_KH220421&KH220443	Second Degree	2	True	Second Degree	0.868959	2.94363	0.884883	0.242672	0.00674348		0.58642	6618	1814.93	0.115117	Second Degree	Third Degree	2.35			0.507	0.493	0	170	7	0.2465	0.2465	filteredout		696	0.968022	0.031917	3e-06	5.7e-05	1e-06	0	0	0	0	0.968022	0.031917	3e-06	0.015962	0	5.8e-05	0.007981	0	0	3e-06	0
KH210899&KH210929	Second Degree	2	True	Second Degree	0.871807	5.96177	0.89429	0.245251	0.00376233		0.503067	86234	23648.9	0.10571	Second Degree	Third Degree	4.567			0.512	0.488	0	138	14	0.244	0.244	Third Degree		17270	0.809539	0.189879	0.000582	0	0	0	0	0	0	0.809539	0.189879	0.000582	0.095522	0	0	0.047761	0	0	0.000582	0
KH210902&KH210921	First Degree	3	True	First Degree	2.32826	7.801	0.769402	0.211002	0.00507641		0.530488	21687	5947.47	0.230598	Siblings	Second Degree	9.586	Parent-Child	14.4788	0.281	0.547	0.172	192	21	0.4455	0.4455	Second Degree		4681	0.576044	0.001651	0.284244	0.02075	0.117307	2e-06	0	2e-06	0	0.576044	0.001651	0.284244	0.37305	4e-06	0.138059	0.201188	0	0.058653	0.284246	0
KH210902&KH210925_KH210941	Third Degree	2	True	Third Degree	5.33434	0.334725	0.90994	0.249543	0.00302344		0.554878	77738	21319	0.0900597	Second Degree	Third Degree	0.228			0.577	0.423	0	121	13	0.2115	0.2115	Third Degree		16145	0.843613	0.120221	0.036166	0	0	0	0	0	0	0.843613	0.120221	0.036166	0.096276	0	0	0.048138	0	0	0.036166	0
KH210902&KH210929	Second Degree	2	True	Second Degree	1.17007	7.21718	0.893171	0.244945	0.00306538		0.518293	75711	20763.1	0.106829	Second Degree	Third Degree	2.019			0.529	0.471	0	141	14	0.2355	0.2355	Third Degree		15673	0.793722	0.19318	0.013085	0	0	1.3e-05	0	0	0	0.793722	0.19318	0.013085	0.109675	1.3e-05	0	0.054838	0	0	0.013085	0
KH210908&KH210957	Second Degree	2	True	Second Degree	6.13411	1.89432	0.83462	0.228888	0.00320238		0.390244	56945	15616.7	0.16538	Second Degree	Third Degree	19.515			0.373	0.627	0	198	25	0.3135	0.3135	Third Degree		9026	0.646888	0.353072	3.6e-05	0	0	0	0	0	3e-06	0.646888	0.353072	3.6e-05	0.176575	3e-06	3e-06	0.088289	3e-06	3e-06	3.6e-05	3e-06
KH210909&KH210919	Second Degree	3	True	Second Degree	1.38922	2.40046	0.871883	0.239106	0.00678425		0.685185	9983	2737.75	0.128117	Second Degree	Third Degree	2.725			0.51	0.49	0	151	6	0.245	0.245	Second Degree		2237	0.657957	0.172677	0	0.019421	0.121579	0	0	0	0.028366	0.657957	0.172677	0	0.205889	0.028366	0.169366	0.132325	0.028366	0.089155	0	0.028366
KH210909&KH210920	Third Degree	2	True	Unrelated		2.03955	0.950244	0.260596	0.00591549		0.679245	10499	2879.26	0.0497562	Third Degree	Unrelated	1.712			0.737	0.263	0	19	1	0.1315	0.1315	Unrelated		2394	0.816815	0.002981	0.007943	0.08105	0.091211	0	0	0	0	0.816815	0.002981	0.007943	0.077842	0	0.172261	0.050323	0	0.045606	0.007943	0
KH210909&KH210947	Second Degree	2	True	Second Degree	0.750255	4.79457	0.893565	0.245053	0.00463678		0.597561	29308	8037.47	0.106435	Third Degree	Second Degree	0.578			0.648	0.352	0	92	7	0.176	0.176	Second Degree		6724	0.673842	0.185047	0.099552	0.012741	0	0	0.018642	0	0.010176	0.673842	0.185047	0.099552	0.216233	0.028818	0.022917	0.115535	0.019497	0.010176	0.099552	0.010176
KH210913&KH210939	First Degree	2	True	First Degree	2.48687	5.33469	0.752884	0.206472	0.00657417		0.626582	7880	2161.02	0.247116	Siblings	Second Degree	3.43	Parent-Child	0.803256	0.279	0.538	0.183	213	9	0.452	0.452	filteredout		1755	0.477141	0.002185	0.262022	0	0	2e-06	0.236175	2e-06	0.022473	0.477141	0.002185	0.262022	0.462719	0.258652	0.022475	0.272118	0.140561	0.022473	0.262024	0.022473
KH210920&KH210947	Second Degree	2	True	Second Degree	0.616283	3.34214	0.891654	0.244529	0.00649504		0.595092	9778	2681.53	0.108346	Third Degree	Second Degree	1.369			0.683	0.317	0	59	5	0.1585	0.1585	Second Degree		2202	0.566752	0.114278	0.066816	0.021735	0	0.114512	0.093574	0.022334	0	0.566752	0.114278	0.066816	0.194135	0.230419	0.044069	0.108764	0.046787	0	0.089149	0
KH210921&KH210925_KH210941	Third Degree	2	True	Third Degree	2.73899	0.885768	0.921523	0.25272	0.00472862		0.597561	22796	6251.61	0.0784771	Third Degree	Second Degree	0.059			0.666	0.334	0	78	7	0.167	0.167	Third Degree		4916	0.621914	0.249546	0	0	0	0.127137	0.001403	0	0	0.621914	0.249546	0	0.125826	0.128541	0	0.063088	0.000702	0	0	0
KH210921&KH210928_KH210942	Third Degree	3	True	Third Degree	2.4992	1.07824	0.925087	0.253697	0.00479116		0.674847	23260	6378.86	0.0749125	Third Degree	Unrelated	1.244			0.759	0.241	0	40	5	0.1205	0.1205	Third Degree		4964	0.714935	0.111163	0.044263	0	0	0.129617	1.8e-05	0	4e-06	0.714935	0.111163	0.044263	0.099862	0.129639	4e-06	0.049936	1.3e-05	4e-06	0.044263	4e-06
KH210921&KH210929	Third Degree	2	True	Third Degree	1.11063	2.04295	0.946739	0.259635	0.00543512		0.664634	22574	6190.73	0.0532614	Third Degree	Second Degree	3.145			0.743	0.257	0	51	8	0.1285	0.1285	Unrelated		4837	0.870436	0.00213	2e-06	0	0	0.127431	1e-06	0	1e-06	0.870436	0.00213	2e-06	0.001068	0.127433	1e-06	0.000535	1e-06	1e-06	2e-06	1e-06
KH210923&KH210957	Second Degree	2	True	Second Degree	4.3103	3.37713	0.853685	0.234116	0.00334444		0.432927	53465	14662.3	0.146315	Second Degree	Third Degree	9.775			0.448	0.552	0	159	16	0.276	0.276	Third Degree		9484	0.696563	0.303189	0.000246	0	0	0	0	0	1e-06	0.696563	0.303189	0.000246	0.151842	2e-06	2e-06	0.075922	1e-06	1e-06	0.000247	1e-06
KH210925_KH210941&KH210928_KH210942	Second Degree	2	True	Second Degree	0.187658	7.45175	0.903947	0.2479	0.00336546		0.509202	84038	23046.7	0.0960529	Second Degree	Third Degree	3.124			0.585	0.415	0	116	23	0.2075	0.2075	Third Degree		17392	0.808423	0.191419	0.000154	0	0	0	0	0	3e-06	0.808423	0.191419	0.000154	0.095867	3e-06	3e-06	0.047935	3e-06	3e-06	0.000154	3e-06
KH210925_KH210941&KH210929	First Degree	3	True	First Degree	4.00187	13.4355	0.769469	0.21102	0.00294885	Parent-offspring	0.189024	79381	21769.6	0.230531	Parent-Child	Second Degree	28.318	Siblings	57.0839	0	1	0	288	1	0.5	0.5	First Degree		16557	0.228563	0.771433	4e-06	0	0	0	0	0	0	0.228563	0.771433	4e-06	0.38572	0	0	0.19286	0	0	4e-06	0
KH210925_KH210941&KH220423	Second Degree	2	True	Second Degree	1.20347	1.61619	0.866236	0.237558	0.00911817		0.75625	3456	947.778	0.133764	Second Degree	Parent-Child	3.594			0.46	0.54	0	236	1	0.27	0.27	filteredout		442	8.8e-05	1e-06	3.1e-05	0.730124	0.253367	0	0	0.016377	1.2e-05	8.8e-05	1e-06	3.1e-05	0.190069	0.016389	0.99988	0.126711	1.2e-05	0.126695	0.016408	1.2e-05
KH210929&KH220423	First Degree	2	True	First Degree	0.629991	5.08287	0.791823	0.217151	0.0090008		0.745342	3615	991.383	0.208177	Parent-Child	Second Degree	1.649	Siblings	3.5231	0	1	0	286	1	0.5	0.5	filteredout		431	2e-06	0.000173	5e-06	0.70187	0.29795	0	0	0	1e-06	2e-06	0.000173	5e-06	0.223554	1e-06	0.999821	0.149021	1e-06	0.148975	5e-06	1e-06
KH210930_KH210945&KH210933	First Degree	3	True	First Degree	5.45865	11.5116	0.752189	0.206281	0.00303002	Parent-offspring	0.237805	69953	19184	0.247811	Parent-Child	Second Degree	29.207	Siblings	55.5669	0	1	0	288	1	0.5	0.5	First Degree	Parent-offspring	14792	0.120823	0.879125	4.9e-05	0	0	0	0	3e-06	0	0.120823	0.879125	4.9e-05	0.439612	3e-06	3e-06	0.219806	0	0	5.2e-05	0
KH210934&KH210936	First Degree	3	True	First Degree	0.147613	12.306	0.810278	0.222212	0.00412894		0.472393	31659	8682.21	0.189722	Siblings	Second Degree	19.134	Parent-Child	31.204	0.32	0.506	0.174	173	24	0.427	0.427	First Degree		6998	0.254962	0.593968	0.092194	0	0	0.039775	0.0191	1e-06	0	0.254962	0.593968	0.092194	0.403503	0.058876	1e-06	0.204139	0.00955	0	0.092195	0
KH210939&KH210947	Third Degree	2	True	Third Degree	2.76287	0.772114	0.919901	0.252275	0.0048487		0.573171	27252	7473.63	0.0800987	Third Degree	Unrelated	0.401			0.782	0.218	0	53	8	0.109	0.109	Third Degree		6093	0.691248	0.277823	9.2e-05	1.8e-05	0.030712	2.8e-05	5.8e-05	7e-06	1.5e-05	0.691248	0.277823	9.2e-05	0.162095	0.000107	0.030751	0.084901	4.4e-05	0.015371	9.8e-05	1.5e-05
KH210943&KH210955	Second Degree	2	True	Second Degree	1.81614	0.906456	0.843713	0.231381	0.00944323		0.732919	4149	1137.83	0.156287	Second Degree	Third Degree	1.844			0.494	0.506	0	164	3	0.253	0.253	filteredout		855	0.280217	0.581906	6.9e-05	0.000208	0	0.1376	0	0	0	0.280217	0.581906	6.9e-05	0.291022	0.1376	0.000209	0.145511	0	0	6.9e-05	0
KH210947&KH220443	First Degree	2	True	First Degree	2.34462	3.23535	0.733715	0.201215	0.00921515		0.735849	2798	767.328	0.266285	Parent-Child	Second Degree	6.83	Siblings	3.03301	0	1	0	283	1	0.5	0.5	filteredout		428	0.540543	0.000407	0.459048	0	0	0	0	0	2e-06	0.540543	0.000407	0.459048	0.459253	2e-06	2e-06	0.229627	2e-06	2e-06	0.459048	2e-06
KH150191_KH150417&KH150639	Second Degree	2	True	Second Degree	3.43491	7.04883	0.875534	0.220766	0.00225483		0.47561	174361	43965.2	0.124466	Second Degree	Third Degree	3.699			0.554	0.446	0	124	21	0.223	0.223	filteredout		801	0.58744	0.412547	0	0	1.2e-05	0	1e-06	0	0	0.58744	0.412547	0	0.206283	1e-06	1.2e-05	0.103143	0	6e-06	0	0
KH150193_KH150286&KH150640	Third Degree	2	True	Third Degree	7.71225	0.0312577	0.906502	0.228575	0.00203518		0.567073	489822	123509	0.0934977	Second Degree	Third Degree	1.926			0.595	0.405	0	115	26	0.2025	0.2025	Third Degree		93712	0.741205	0.256739	0.002051	0	0	0	0	0	4e-06	0.741205	0.256739	0.002051	0.130425	4e-06	4e-06	0.065215	4e-06	4e-06	0.002051	4e-06
KH150197&KH150198	First Degree	3	True	First Degree	4.4821	13.7031	0.766287	0.19322	0.00259981	Parent-offspring	0.20122	101527	25600.1	0.233713	Parent-Child	Second Degree	19.866	Siblings	43.5621	0	1	0	289	1	0.5	0.5	First Degree		20622	0.214118	0.546878	0.000246	0.097573	0.141185	0	0	0	0	0.214118	0.546878	0.000246	0.379574	0	0.238757	0.207435	0	0.070592	0.000246	0
KH150197&KH150630	Second Degree	3	True	Second Degree	5.80123	4.77545	0.854829	0.215545	0.00223502		0.414634	304785	76851.6	0.145171	Second Degree	Third Degree	10.346			0.415	0.585	0	171	13	0.2925	0.2925	Second Degree		60993	0.585001	0.398976	0.016023	0	0	0	0	0	0	0.585001	0.398976	0.016023	0.215511	0	0	0.107756	0	0	0.016023	0
KH150197&KH150639	First Degree	3	True	First Degree	7.91517	18.3607	0.756019	0.19063	0.0017993	Parent-offspring	0.097561	232198	58548.8	0.243981	Parent-Child	Second Degree	29.31	Siblings	65.6562	0	1	0	289	1	0.5	0.5	First Degree		47526	0.185541	0.784704	0.029743	1e-06	0	0	0	0	1.2e-05	0.185541	0.784704	0.029743	0.422106	1.2e-05	1.2e-05	0.211059	1.2e-05	1.2e-05	0.029743	1.2e-05
KH150197&KH180045	Second Degree	3	True	Second Degree	3.60812	2.14109	0.847414	0.213676	0.00411171		0.447853	33958	8562.52	0.152586	Second Degree	Third Degree	8.377			0.412	0.588	0	195	12	0.294	0.294	Second Degree		6434	0.464981	0.303773	0.047967	0.182819	0.00042	1e-05	5e-06	1.5e-05	1e-05	0.464981	0.303773	0.047967	0.200181	4e-05	0.183264	0.100149	1.2e-05	0.000219	0.047982	1e-05
KH150198&KH150630	Second Degree	2	True	Second Degree	3.41842	7.12362	0.87585	0.220846	0.00224236		0.445122	242436	61130.3	0.12415	Second Degree	Third Degree	7.515			0.501	0.499	0	149	26	0.2495	0.2495	Third Degree		46892	0.511332	0.235021	2e-06	0	0	0.192815	0.060829	0	0	0.511332	0.235021	2e-06	0.163135	0.253644	0	0.089171	0.030415	0	2e-06	0
KH150198&KH150639	First Degree	3	True	First Degree	4.77933	13.6133	0.763778	0.192587	0.0025705	Siblings	0.439024	170671	43034.8	0.236222	Siblings	Second Degree	28.549	Parent-Child	34.1725	0.222	0.579	0.199	175	27	0.4885	0.4885	First Degree		34007	0.278346	0.357706	0.110063	0	0	0.132819	0.121064	1e-06	2e-06	0.278346	0.357706	0.110063	0.379715	0.253886	3e-06	0.204992	0.060534	2e-06	0.110063	2e-06
KH150198&KH180045	Third Degree	3	True	Third Degree	4.01754	0.40935	0.912029	0.229969	0.00355993		0.58642	26995	6806.8	0.0879707	Third Degree	Second Degree	3.001			0.692	0.308	0	66	6	0.154	0.154	Third Degree		5020	0.60374	0.115016	0.004626	0.002058	0.018477	0.234957	0	4.4e-05	0.021083	0.60374	0.115016	0.004626	0.097074	0.256084	0.041661	0.061388	0.021083	0.030321	0.004669	0.021083
KH150204_KH150634&KH150610	Third Degree	3	True	Third Degree	4.57892	2.20231	0.926548	0.233629	0.00232397		0.603659	1182300	298117	0.0734521	Third Degree	Second Degree	1.07			0.669	0.331	0	92	21	0.1655	0.1655	Third Degree		192531	0.782694	0.217283	2.2e-05	0	0	0	0	0	0	0.782694	0.217283	2.2e-05	0.108664	0	0	0.054332	0	0	2.2e-05	0
KH150204_KH150634&KH150628	Second Degree	2	True	Second Degree	1.83372	7.90974	0.888606	0.224062	0.00242615		0.5	419410	105754	0.111394	Second Degree	Third Degree	4.348			0.572	0.428	0	125	22	0.214	0.214	Third Degree		81738	0.659957	0.322367	0.016194	0.000982	0.000494	0	0	0	5e-06	0.659957	0.322367	0.016194	0.177753	5e-06	0.001482	0.088941	5e-06	0.000252	0.016194	5e-06
KH150208_KH150210&KH150418	Second Degree	3	True	Second Degree	2.41243	5.26702	0.876799	0.221085	0.00307823		0.45122	273926	69070.5	0.123201	Second Degree	Third Degree	20.54			0.452	0.548	0	159	33	0.274	0.274	Second Degree		55779	0.60224	0.397751	9e-06	0	0	0	0	0	1e-06	0.60224	0.397751	9e-06	0.198885	1e-06	1e-06	0.099443	1e-06	1e-06	9e-06	1e-06
KH150208_KH150210&KH150613_KH180043	Third Degree	2	True	Third Degree	3.61948	2.31476	0.930629	0.234658	0.00265567		0.664634	500016	126079	0.0693708	Third Degree	Second Degree	3.353			0.694	0.306	0	88	14	0.153	0.153	Unrelated		98482	0.842857	0.156665	0.000473	0	4e-06	0	0	0	0	0.842857	0.156665	0.000473	0.078809	0	4e-06	0.039405	0	2e-06	0.000473	0
KH150287&KH150629	Second Degree	3	True	Second Degree	3.18504	7.80018	0.879068	0.221657	0.0021519		0.45122	312374	78765.2	0.120932	Second Degree	Third Degree	5.368			0.536	0.464	0	140	24	0.232	0.232	Third Degree		61630	0.635183	0.349291	0	0	0	5.8e-05	0.015464	4e-06	0	0.635183	0.349291	0	0.186244	0.015527	5e-06	0.095055	0.007732	0	4e-06	0
KH150418&KH150613_KH180043	First Degree	3	True	First Degree	9.59361	19.4377	0.750539	0.189249	0.00162852	Parent-offspring	0.097561	433995	109432	0.249461	Parent-Child	Second Degree	28.761	Siblings	66.5781	0	1	0	289	1	0.5	0.5	First Degree		85476	0.155815	0.844131	4e-05	0	0	1e-06	9e-06	3e-06	0	0.155815	0.844131	4e-05	0.422113	1.4e-05	3e-06	0.211057	5e-06	0	4.4e-05	0
KH150418&KH150626	Second Degree	2	True	Second Degree	3.06917	7.54822	0.87915	0.221678	0.00222645		0.426829	348447	87861	0.12085	Second Degree	Third Degree	9.591			0.439	0.561	0	162	16	0.2805	0.2805	Third Degree		70390	0.653394	0.344455	0.002148	0	0	0	0	3e-06	0	0.653394	0.344455	0.002148	0.174376	3e-06	3e-06	0.087188	0	0	0.00215	0
KH150418&KH150640	Second Degree	2	True	Second Degree	3.39287	7.85639	0.877974	0.221382	0.00210139		0.487805	337675	85144.9	0.122026	Second Degree	Third Degree	15.504			0.488	0.512	0	150	30	0.256	0.256	Third Degree		65875	0.687267	0.31249	0.000238	0	0	0	0	0	6e-06	0.687267	0.31249	0.000238	0.156488	6e-06	6e-06	0.078247	6e-06	6e-06	0.000238	6e-06
KH150418&KH180045	Second Degree	2	True	Second Degree	1.99183	4.39911	0.877031	0.221144	0.00369884		0.453988	47806	12054.3	0.122969	Second Degree	Third Degree	7.779			0.496	0.504	0	134	18	0.252	0.252	Third Degree		8917	0.62531	0.213187	5.6e-05	0.128974	0.032457	0	0	0	1.7e-05	0.62531	0.213187	5.6e-05	0.131009	1.7e-05	0.161448	0.06957	1.7e-05	0.016245	5.6e-05	1.7e-05
KH150610&KH150621	Third Degree	2	True	Third Degree	4.43705	2.36311	0.927969	0.233988	0.0023175		0.613497	127387	32120.7	0.0720308	Third Degree	Unrelated	1.857			0.754	0.246	0	73	15	0.123	0.123	Unrelated		21424	0.048836	0.003025	0	0.886737	0.061402	0	0	0	0	0.048836	0.003025	0	0.047564	0	0.948139	0.031457	0	0.030701	0	0
KH150613_KH180043&KH150626	Third Degree	2	True	Third Degree	2.41285	5.30522	0.949211	0.239344	0.00204188		0.670732	705136	177800	0.0507889	Third Degree	Unrelated	2.11			0.785	0.215	0	57	15	0.1075	0.1075	Unrelated		133403	0.920454	0.059458	0	0.011026	0.00906	0	0	0	1e-06	0.920454	0.059458	0	0.036525	1e-06	0.020087	0.019396	1e-06	0.004531	0	1e-06
KH150613_KH180043&KH180045	Third Degree	2	True	Third Degree	3.81313	1.26889	0.921855	0.232446	0.00310101		0.585366	112710	28419.9	0.0781448	Third Degree	Unrelated	1.68			0.718	0.282	0	80	14	0.141	0.141	Unrelated		19039	0.824009	0.087744	0.002235	0.08601	1e-06	0	0	0	2e-06	0.824009	0.087744	0.002235	0.046109	2e-06	0.086013	0.023056	2e-06	2e-06	0.002235	2e-06
KH150618&KH150621	First Degree	3	True	First Degree	5.25256	11.1788	0.752562	0.189759	0.00287732	Parent-offspring	0.116564	92607	23350.9	0.247438	Parent-Child	Second Degree	31.115	Siblings	60.2326	0	1	0	289	1	0.5	0.5	Second Degree		16890	0.033186	0.000854	0.013617	0.549077	0.37364	0	0.005235	0.003195	0.021197	0.033186	0.000854	0.013617	0.319397	0.029626	0.947108	0.217656	0.023814	0.208016	0.016812	0.021197
KH150620&KH150622	First Degree	3	True	First Degree	6.73737	14.2752	0.752381	0.189713	0.00225	Siblings	0.463415	1200339	302666	0.247619	Siblings	Second Degree	55.349	Parent-Child	56.54	0.216	0.532	0.251	158	38	0.517	0.517	First Degree	Siblings	194628	0.316244	0.446617	0.237139	0	0	0	0	0	0	0.316244	0.446617	0.237139	0.460448	0	0	0.230224	0	0	0.237139	0
KH150620&KH150623	First Degree	2	True	First Degree	4.3691	14.5795	0.769267	0.193971	0.00249507	Siblings	0.45122	1228483	309762	0.230733	Siblings	Second Degree	16.878	Parent-Child	50.3237	0.28	0.589	0.131	173	37	0.4255	0.4255	Second Degree		194561	0.445912	0.41378	0.1403	4e-06	3e-06	0	0	0	1e-06	0.445912	0.41378	0.1403	0.347193	1e-06	7e-06	0.173597	1e-06	2e-06	0.1403	1e-06
KH150621&KH201272	Second Degree	2	False	Second Degree	0.0485898	2.14693	0.904175	0.227988	0.010767		0.80625	2351	592.805	0.0958248	Second Degree	Third Degree	1.047			0.506	0.494	0	123	2	0.247	0.247	filteredout		386	3.5e-05	8.4e-05	0.000904	0.038293	0.035052	2.9e-05	6e-06	0.894809	0.030787	3.5e-05	8.4e-05	0.000904	0.058027	0.925632	0.998941	0.048789	0.030791	0.048313	0.895713	0.030787
KH150622&KH150623	First Degree	3	True	First Degree	6.7593	14.1903	0.752004	0.189618	0.00225676	Siblings	0.402439	1199854	302544	0.247996	Siblings	Second Degree	35.628	Parent-Child	61.6948	0.212	0.602	0.186	183	37	0.487	0.487	First Degree	Siblings	194598	0.311896	0.501049	0.187055	0	0	0	0	0	0	0.311896	0.501049	0.187055	0.437579	0	0	0.21879	0	0	0.187055	0
KH150630&KH150639	Second Degree	2	True	Second Degree	3.78008	7.57454	0.87504	0.220642	0.00208189		0.487805	581604	146652	0.12496	Second Degree	Third Degree	7.454			0.536	0.464	0	130	30	0.232	0.232	Third Degree		112057	0.664432	0.3352	1.1e-05	3.4e-05	0.000321	0	0	0	3e-06	0.664432	0.3352	1.1e-05	0.167854	4e-06	0.000357	0.083969	3e-06	0.000164	1.1e-05	3e-06
KH150639&KH150641	Second Degree	2	True	Second Degree	4.67541	6.25381	0.866145	0.218399	0.00216293		0.457317	563323	142042	0.133855	Second Degree	Third Degree	7.987			0.49	0.51	0	145	24	0.255	0.255	Third Degree		109759	0.625297	0.374683	1e-05	0	0	1e-06	7e-06	0	1e-06	0.625297	0.374683	1e-05	0.187358	9e-06	1e-06	0.093681	5e-06	1e-06	1e-05	1e-06
KH150639&KH180045	Third Degree	2	True	Third Degree	2.67598	1.95582	0.932641	0.235166	0.00340243		0.613497	63266	15952.5	0.0673588	Third Degree	Unrelated	3.113			0.71	0.29	0	78	14	0.145	0.145	Unrelated		11707	0.849981	0.009142	0	0.093631	0.030288	0	0	0	0.016958	0.849981	0.009142	0	0.044245	0.016958	0.140877	0.034387	0.016958	0.032102	0	0.016958
KH150640&KH180045	Third Degree	2	True	Second Degree	0.277262	7.23799	0.902791	0.227639	0.00314548		0.585366	85350	21521	0.0972087	Third Degree	Second Degree	2.079			0.695	0.305	0	78	12	0.1525	0.1525	Unrelated		14483	0.790337	0.034257	0.046303	0.088707	0.040392	0	5e-06	0	0	0.790337	0.034257	0.046303	0.093729	5e-06	0.129098	0.051914	2e-06	0.020196	0.046303	0
KH180054&KH180058	Third Degree	3	True	Third Degree	3.20399	2.044	0.930593	0.234649	0.00300294		0.615854	240640	60677.5	0.0694073	Third Degree	Second Degree	2.814			0.655	0.345	0	102	14	0.1725	0.1725	Third Degree		46405	0.685086	0.314874	1.6e-05	0	0	0	0	1e-05	1.4e-05	0.685086	0.314874	1.6e-05	0.157467	2.4e-05	2.4e-05	0.078741	1.4e-05	1.4e-05	2.6e-05	1.4e-05
KH180054&KH180139_KH180140	Second Degree	3	True	Second Degree	0.405235	8.06212	0.901763	0.22738	0.00279179		0.518293	189964	47899.5	0.0982367	Second Degree	Third Degree	10.27			0.534	0.466	0	138	24	0.233	0.233	Second Degree		36991	0.553218	0.446724	4e-05	0	0	1e-05	0	1e-06	6e-06	0.553218	0.446724	4e-05	0.223408	1.8e-05	8e-06	0.111707	6e-06	6e-06	4.1e-05	6e-06
KH180066&KH200132	Second Degree	3	True	Second Degree	2.4449	4.37396	0.872636	0.220035	0.00346672		0.490798	29318	7392.54	0.127364	Second Degree	Third Degree	3.966			0.51	0.49	0	142	14	0.245	0.245	Second Degree		5383	0.730568	0.039035	1.3e-05	0.00392	0.226463	0	0	0	0	0.730568	0.039035	1.3e-05	0.189378	0	0.230384	0.122997	0	0.113232	1.3e-05	0
KH180066&KH200159	Third Degree	3	True	Third Degree	3.00679	0.967413	0.921464	0.232347	0.00396542		0.603659	22518	5677.92	0.0785361	Third Degree	Second Degree	3.54			0.696	0.304	0	82	6	0.152	0.152	Third Degree		4081	0.772191	0.167886	0.000177	0.0004	0.059346	0	0	0	0	0.772191	0.167886	0.000177	0.128629	0	0.059746	0.071733	0	0.029673	0.000177	0
KH180066&KH200185	Second Degree	3	True	Second Degree	1.46713	3.04221	0.875748	0.22082	0.00524226		0.609756	12680	3197.27	0.124252	Second Degree	Third Degree	2.85			0.498	0.502	0	138	5	0.251	0.251	Second Degree		2354	0.119073	0.45156	0.016434	0.410053	0	9e-06	0	7e-06	0.002865	0.119073	0.45156	0.016434	0.245079	0.002881	0.412925	0.123972	0.002865	0.002865	0.016441	0.002865
KH180068&KH210310	Second Degree	2	True	Second Degree	2.46042	1.22897	0.843729	0.212747	0.00640733		0.583851	8771	2211.61	0.156271	Second Degree	Third Degree	6.068			0.422	0.578	0	200	4	0.289	0.289	filteredout		1593	0.217538	0.144031	0.001575	0.347794	0.196507	0.081461	0	0.000642	0.010453	0.217538	0.144031	0.001575	0.231423	0.092556	0.555395	0.145501	0.010453	0.108706	0.002217	0.010453
KH180070&KH180119	Second Degree	2	True	Second Degree	2.31703	0.391387	0.826048	0.208288	0.00872801		0.6875	3692	930.939	0.173952	Second Degree	Parent-Child	3.386			0.463	0.537	0	241	5	0.2685	0.2685	filteredout		786	0.52986	0.002519	0.46747	0.000138	1e-06	0	0	0	1.2e-05	0.52986	0.002519	0.46747	0.468743	1.2e-05	0.00015	0.234378	1.2e-05	1.3e-05	0.46747	1.2e-05
KH180072&KH180086	Third Degree	2	True	Third Degree	1.36634	3.58119	0.95149	0.239918	0.00318531		0.650307	35808	9029	0.0485103	Unrelated	Third Degree	0.2			0.825	0.175	0	43	7	0.0875	0.0875	Third Degree		6274	0.891613	0.011875	0.096512	0	0	0	0	0	0	0.891613	0.011875	0.096512	0.102449	0	0	0.051225	0	0	0.096512	0
KH180085&KH180121	Second Degree	3	True	Second Degree	2.63913	3.48803	0.865869	0.218329	0.00385808		0.515337	31196	7866.08	0.134131	Second Degree	Third Degree	8.586			0.48	0.52	0	156	21	0.26	0.26	Second Degree		5162	0.750718	0.000465	0.219281	0.029537	0	0	0	0	0	0.750718	0.000465	0.219281	0.219513	0	0.029537	0.109756	0	0	0.219281	0
KH180086&KH210310	Third Degree	2	True	Unrelated		2.00623	0.94118	0.237319	0.00439017		0.656442	19813	4995.85	0.0588197	Third Degree	Unrelated	1.869			0.751	0.249	0	42	4	0.1245	0.1245	Unrelated		3508	0.890016	0.01231	6.7e-05	1.3e-05	0.097594	0	0	0	0	0.890016	0.01231	6.7e-05	0.079418	0	0.097607	0.051908	0	0.048797	6.7e-05	0
KH180086&KH210412	Third Degree	3	True	Third Degree	4.03583	0.240887	0.90977	0.229399	0.00368492		0.607362	27450	6921.53	0.0902297	Third Degree	Second Degree	1.472			0.676	0.324	0	74	8	0.162	0.162	Third Degree		5005	0.762213	0.183747	0.000886	0.004246	0	0	0.048908	0	0	0.762213	0.183747	0.000886	0.12944	0.048908	0.004247	0.070834	0.024454	0	0.000886	0
KH180088&KH210412	Second Degree	2	True	Second Degree	0.752399	1.41561	0.873714	0.220307	0.0109036		0.778481	2147	541.367	0.126286	Second Degree	Third Degree	1.819			0.49	0.51	0	129	2	0.255	0.255	filteredout		359	0.714444	4.7e-05	0	0	0	0.072269	0.21324	0	0	0.714444	4.7e-05	0	0.159954	0.28551	0	0.106632	0.10662	0	0	0
KH180094&KH201272	First Degree	2	True	First Degree	1.71163	2.67317	0.739308	0.186417	0.0107823		0.821656	2135	538.341	0.260692	Siblings	Second Degree	6.549	Parent-Child	0.11011	0.228	0.504	0.268	233	3	0.52	0.52	filteredout		402	1.5e-05	1.8e-05	0.000763	0.115609	0.50824	1.4e-05	0	0.375341	0	1.5e-05	1.8e-05	0.000763	0.381952	0.375355	0.999189	0.254506	0	0.25412	0.376104	0
KH180126&KH201322	First Degree	2	True	First Degree	2.296	7.83084	0.769989	0.194153	0.0046686		0.549383	10296	2596.14	0.230011	Parent-Child	Second Degree	9.819	Siblings	15.1528	0	1	0	289	1	0.5	0.5	filteredout		1824	0.504855	0.005537	0.223191	0	0	0.15447	1e-06	0	0.111947	0.504855	0.005537	0.223191	0.337907	0.266417	0.111947	0.224927	0.111947	0.111947	0.223191	0.111947
KH180131&KH180831_KH180832	Second Degree	3	True	Second Degree	0.0514802	4.62043	0.905217	0.228251	0.00505984		0.582822	12920	3257.78	0.094783	Second Degree	Third Degree	3.055			0.537	0.463	0	126	10	0.2315	0.2315	Second Degree		2362	0.782087	0.007588	0.209096	0	0	0	0	0	0.001229	0.782087	0.007588	0.209096	0.214119	0.001229	0.001229	0.107674	0.001229	0.001229	0.209096	0.001229
KH180137_KH182329&KH180159	Third Degree	2	True	Third Degree	1.92132	4.10697	0.94883	0.239248	0.00261424		0.652439	98492	24834.8	0.0511698	Third Degree	Unrelated	0.949			0.774	0.226	0	63	11	0.113	0.113	Third Degree		17992	0.743129	0.149186	0.000404	0	0	0.069773	0.037508	0	0	0.743129	0.149186	0.000404	0.103128	0.107281	0	0.056253	0.018754	0	0.000404	0
KH180137_KH182329&KH180163	Second Degree	2	True	Second Degree	1.86131	1.42422	0.853139	0.215119	0.00719491		0.650307	5741	1447.6	0.146861	Second Degree	Third Degree	5.276			0.479	0.521	0	181	7	0.2605	0.2605	filteredout		1006	0.544805	0.000826	0	0.055181	0.230802	0.168177	0	0.000208	0	0.544805	0.000826	0	0.173515	0.168385	0.286191	0.115608	0	0.115401	0.000208	0
KH180150_KH180151&KH180162	First Degree	3	True	First Degree	4.66967	10.1236	0.753313	0.189948	0.00319593		0.253086	39595	9983.89	0.246687	Parent-Child	Second Degree	22.239	Siblings	44.3187	0	1	0	288	1	0.5	0.5	First Degree	Parent-offspring	7138	0.050944	0.945147	0.003895	0	0	0	0	0	1.4e-05	0.050944	0.945147	0.003895	0.476483	1.4e-05	1.4e-05	0.238248	1.4e-05	1.4e-05	0.003895	1.4e-05
KH180159&KH180884	First Degree	3	True	First Degree	3.42976	6.6558	0.748738	0.188794	0.00468771		0.527607	12940	3262.83	0.251262	Siblings	Second Degree	10.793	Parent-Child	7.26246	0.244	0.528	0.228	186	16	0.492	0.492	First Degree		2260	0.106489	0.672295	3e-05	0.06932	0.151849	0	0	0	1.8e-05	0.106489	0.672295	3e-05	0.450082	1.8e-05	0.221186	0.244031	1.8e-05	0.075942	3e-05	1.8e-05
KH180827_KH180828&KH180873_KH180874	First Degree	2	True	First Degree	0.0625776	4.33414	0.809831	0.204199	0.0107531		0.836478	2429	612.473	0.190169	Siblings	Second Degree	2.029	Parent-Child	0.708869	0.27	0.504	0.226	203	4	0.478	0.478	filteredout		432	0.722208	0.001697	1.6e-05	0	0.050338	0	0	0	0.22574	0.722208	0.001697	1.6e-05	0.264359	0.22574	0.276078	0.251342	0.22574	0.250909	1.6e-05	0.22574
KH200132&KH200155	Third Degree	2	True	Unrelated		0.96675	0.926992	0.233741	0.00541006		0.67284	11517	2904.02	0.0730077	Third Degree	Unrelated	1.667			0.761	0.239	0	33	4	0.1195	0.1195	Unrelated		2037	0.86043	8e-06	0	0.008466	0.092903	0.031235	0	5.5e-05	0.006904	0.86043	8e-06	0	0.076585	0.038193	0.108327	0.053357	0.006904	0.053355	5.5e-05	0.006904
KH200153&KH200165	First Degree	2	True	First Degree	3.07633	2.17945	0.702752	0.177199	0.00899547		0.720497	3149	794.021	0.297248	Parent-Child	Second Degree	11.357	Siblings	1.36169	0	1	0	287	1	0.5	0.5	filteredout		550	0.589297	2.7e-05	1.2e-05	0.002058	0.379502	1e-06	0	0	0.029104	0.589297	2.7e-05	1.2e-05	0.313756	0.029104	0.410663	0.218867	0.029104	0.218854	1.2e-05	0.029104
KH200155&KH200185	Second Degree	2	True	Second Degree	0.594683	2.55349	0.888541	0.224046	0.00750884		0.691358	5057	1275.12	0.111459	Second Degree	Third Degree	2.066			0.512	0.488	0	140	6	0.244	0.244	filteredout		884	0.436382	0.125852	0.045513	0.382574	0.009678	0	0	0	0	0.436382	0.125852	0.045513	0.115698	1e-06	0.392252	0.059059	0	0.004839	0.045513	0
KH200155&KH201254	First Degree	2	True	First Degree	2.06301	3.58426	0.744004	0.187601	0.00837185		0.74375	3097	780.91	0.255996	Parent-Child	Second Degree	5.729	Siblings	1.5838	0	1	0	284	1	0.5	0.5	filteredout		514	0.51289	0.196525	0.170175	1.9e-05	0.000421	0	7.4e-05	0	0.119896	0.51289	0.196525	0.170175	0.388705	0.11997	0.120336	0.254362	0.119933	0.120106	0.170175	0.119896
KH200159&KH200185	First Degree	2	True	First Degree	1.92176	2.94828	0.738511	0.186216	0.00970796		0.726115	2336	589.023	0.261489	Parent-Child	Second Degree	8.169	Siblings	2.16367	0	1	0	280	1	0.5	0.5	filteredout		424	9e-06	9e-06	0	0.593742	0.406102	0	0	0.000138	0	9e-06	9e-06	0	0.304581	0.000138	0.999982	0.203053	0	0.203051	0.000138	0
KH200159&KH201307	Second Degree	2	True	Second Degree	0.700714	1.48734	0.876227	0.220941	0.0108037		0.761006	2168	546.662	0.123773	Second Degree	Third Degree	1.144			0.498	0.502	0	124	2	0.251	0.251	filteredout		400	2e-06	0.000117	0.000448	0.890904	0.108494	0	0	3.5e-05	0	2e-06	0.000117	0.000448	0.081877	3.5e-05	0.999434	0.0545	0	0.054247	0.000483	0
KH200169&KH200236	Second Degree	2	True	Second Degree	1.35794	0.995782	0.852163	0.214873	0.0100433		0.7875	2797	705.265	0.147837	Second Degree	Third Degree	2.467			0.48	0.52	0	238	2	0.26	0.26	filteredout		505	0.365222	0.360822	0.021416	0	0	0.252533	7e-06	0	0	0.365222	0.360822	0.021416	0.201832	0.25254	0	0.100917	4e-06	0	0.021416	0
KH200172&KH200200	First Degree	2	True	First Degree	2.3851	3.5207	0.736777	0.185779	0.00800539		0.732919	3558	897.151	0.263223	Siblings	Second Degree	7.318	Parent-Child	2.21803	0.241	0.502	0.257	216	7	0.508	0.508	filteredout		599	7e-06	0.002091	0.368139	0.51705	0.112713	0	0	0	0	7e-06	0.002091	0.368139	0.453719	0	0.629763	0.240949	0	0.056356	0.368139	0
KH200179&KH200230_KH201255	Second Degree	2	True	Second Degree	1.10445	1.9705	0.872577	0.220021	0.00768761		0.704403	4845	1221.67	0.127423	Second Degree	Third Degree	1.57			0.501	0.499	0	123	5	0.2495	0.2495	filteredout		833	0.87804	0	0	0.000108	0	0.004983	0	1e-06	0.116868	0.87804	0	0	0.116868	0.121852	0.116977	0.116868	0.116868	0.116868	1e-06	0.116868
KH200179&KH200236	Second Degree	2	True	Second Degree	1.49444	2.01502	0.866328	0.218445	0.00673582		0.701863	5942	1498.28	0.133672	Second Degree	Third Degree	3.104			0.485	0.515	0	151	5	0.2575	0.2575	filteredout		1059	0.567748	3.6e-05	0	0.000807	1e-06	0.323072	1.6e-05	0.00024	0.108081	0.567748	3.6e-05	0	0.108112	0.431409	0.109129	0.108099	0.108089	0.108082	0.00024	0.108081
KH200185&KH200200	Second Degree	2	True	Second Degree	0.96004	1.27437	0.865969	0.218354	0.0105796		0.74375	2528	637.436	0.134031	Second Degree	Third Degree	1.962			0.491	0.509	0	171	5	0.2545	0.2545	filteredout		430	0.68288	0.142186	0.007151	0	0	0.165159	0.002622	0	1e-06	0.68288	0.142186	0.007151	0.080212	0.167783	1e-06	0.040434	0.001312	1e-06	0.007151	1e-06
KH200185&KH200236	Second Degree	2	True	Second Degree	1.50885	1.32204	0.856282	0.215912	0.00835041		0.72327	4349	1096.6	0.143718	Second Degree	Third Degree	3.249			0.473	0.527	0	166	4	0.2635	0.2635	filteredout		807	0.797676	0.009325	0.19222	5.8e-05	0	0	0.000652	0	6.9e-05	0.797676	0.009325	0.19222	0.197441	0.000721	0.000127	0.098836	0.000395	6.9e-05	0.19222	6.9e-05
KH150629&KH210900	First Degree	3	False	First Degree	8.84866	17.2626	0.748959	0.193274	0.00185306	Parent-offspring	0.109756	397099	102474	0.251041	Parent-Child	Second Degree	30.991	Siblings	70.5175	0	1	0	290	1	0.5	0.5	First Degree	Parent-offspring	53760	0.050732	0.94908	0.000187	0	0	0	0	1e-06	0	0.050732	0.94908	0.000187	0.474727	1e-06	1e-06	0.237363	0	0	0.000188	0
KH150637&KH210943	Second Degree	2	False	Second Degree	2.3775	4.21318	0.872431	0.225137	0.00367077		0.579268	43267	11165.4	0.127569	Second Degree	Third Degree	6.242			0.477	0.523	0	163	11	0.2615	0.2615	First Degree		9424	0.337188	0.54369	0.096539	0.000139	0.022426	0	1.5e-05	2e-06	0	0.337188	0.54369	0.096539	0.385215	1.6e-05	0.022567	0.195413	7e-06	0.011213	0.096541	0
KH150637&KH210955	Second Degree	3	False	Second Degree	3.58079	2.01522	0.846261	0.218384	0.00432323		0.441718	22346	5766.54	0.153739	Second Degree	Third Degree	9.061			0.376	0.624	0	191	8	0.312	0.312	Second Degree		3389	0.589082	1e-06	0.272458	0.138455	0	2e-06	1e-06	1e-06	1e-06	0.589082	1e-06	0.272458	0.27246	4e-06	0.138456	0.13623	1e-06	1e-06	0.272459	1e-06
KH180072&KH220427	Second Degree	2	False	Second Degree	0.940482	1.4558	0.869455	0.224369	0.010096		0.823899	2536	654.433	0.130545	Second Degree	Third Degree	1.383			0.496	0.504	0	166	2	0.252	0.252	filteredout		336	0.613425	0.001252	0	0	0.21372	0.171603	0	0	0	0.613425	0.001252	0	0.160916	0.171603	0.21372	0.107173	0	0.10686	0	0
KH200210&KH220443	Second Degree	2	False	Second Degree	0.40488	2.42525	0.892838	0.230403	0.00854831		0.716981	3572	921.78	0.107162	Second Degree	Third Degree	1.173			0.505	0.495	0	177	4	0.2475	0.2475	filteredout		542	0.000904	0.00216	0.117832	0.879102	0	0	0	0	1e-06	0.000904	0.00216	0.117832	0.118914	1e-06	0.879103	0.059457	1e-06	1e-06	0.117832	1e-06
[truncated: 23 more columns]

## Sheet: Sup Table 4 - ancIBD results
Supplementary Table 4. ancIBD results
iid1	iid2	max_IBD	sum_IBD>8	n_IBD>8	sum_IBD>12	n_IBD>12	sum_IBD>16	n_IBD>16	sum_IBD>20	n_IBD>20	Date BP (iid1)	Group ID (iid1)	Date BP (iid2)	Group ID (iid2)
I1767	I2417	12.5526	23.2696	2	12.5526	1	0	0	0	0	4045	England_BellBeaker_highEEF.AG	4250	England_BellBeaker_lowEEF.AG
I1767	I3256	10.0262	10.0262	1	0	0	0	0	0	0	4045	England_BellBeaker_highEEF.AG	4063	England_BellBeaker.AG
I1767	I5367	8.4435	16.634	2	0	0	0	0	0	0	4045	England_BellBeaker_highEEF.AG	4312	Scotland_BellBeaker.AG
I1767	I5379	10.5067	10.5067	1	0	0	0	0	0	0	4045	England_BellBeaker_highEEF.AG	4333	England_BellBeaker_highEEF.AG
I1767	I6582	16.3589	34.6826	3	16.3589	1	16.3589	1	0	0	4045	England_BellBeaker_highEEF.AG	4171	Poland_BellBeaker.AG
I1767	I6583	9.9595	19.4917	2	0	0	0	0	0	0	4045	England_BellBeaker_highEEF.AG	4138	Poland_BellBeaker.AG
I1767	I6590	9.0707	17.5076	2	0	0	0	0	0	0	4045	England_BellBeaker_highEEF.AG	4200	Germany_BellBeaker.AG
I1767	I6591	8.4268	8.4268	1	0	0	0	0	0	0	4045	England_BellBeaker_highEEF.AG	4200	Germany_BellBeaker.AG
I1767	I0103	10.9979	10.9979	1	0	0	0	0	0	0	4045	England_BellBeaker_highEEF.AG	4472	Germany_CordedWare.AG
I1767	I2450	8.9342	8.9342	1	0	0	0	0	0	0	4045	England_BellBeaker_highEEF.AG	4248	England_BellBeaker.AG
I1767	I2454	9.8472	28.1196	3	0	0	0	0	0	0	4045	England_BellBeaker_highEEF.AG	4042	England_BellBeaker_lowEEF.AG
I1767	I2457	8.90771	8.90771	1	0	0	0	0	0	0	4045	England_BellBeaker_highEEF.AG	4056	England_C_EBA.AG
I1767	I4895	8.5072	8.5072	1	0	0	0	0	0	0	4045	England_BellBeaker_highEEF.AG	4106	Czechia_BellBeaker.AG
I1767	I4950	10.3391	10.3391	1	0	0	0	0	0	0	4045	England_BellBeaker_highEEF.AG	4250	England_BellBeaker.AG
I1767	I5512	10.1178	19.1554	2	0	0	0	0	0	0	4045	England_BellBeaker_highEEF.AG	4250	England_BellBeaker.AG
I1767	I5525	9.4306	9.4306	1	0	0	0	0	0	0	4045	England_BellBeaker_highEEF.AG	4250	Germany_BellBeaker.AG
I1767	I5748	11.8501	21.1719	2	0	0	0	0	0	0	4045	England_BellBeaker_highEEF.AG	4383	Netherlands_LNB_BellBeaker.AG
I1767	I5833	10.6262	10.6262	1	0	0	0	0	0	0	4045	England_BellBeaker_highEEF.AG	4200	Germany_BellBeaker.AG
I1767	I5834	8.2018	8.2018	1	0	0	0	0	0	0	4045	England_BellBeaker_highEEF.AG	4200	Germany_BellBeaker.AG
I1767	I6774	10.3927	10.3927	1	0	0	0	0	0	0	4045	England_BellBeaker_highEEF.AG	4121	England_BellBeaker_lowEEF.AG
I1767	I7199	8.183	8.183	1	0	0	0	0	0	0	4045	England_BellBeaker_highEEF.AG	4039	Czechia_EBA.AG
I1767	I7207	8.916	8.916	1	0	0	0	0	0	0	4045	England_BellBeaker_highEEF.AG	4370	Czechia_EBA_CordedWare.AG
I1767	I7213	12.2297	22.3413	2	12.2297	1	0	0	0	0	4045	England_BellBeaker_highEEF.AG	4231	Czechia_BellBeaker.AG
I1767	I7214	11.1141	11.1141	1	0	0	0	0	0	0	4045	England_BellBeaker_highEEF.AG	4200	Czechia_BellBeaker.AG
I1767	I7249	9.3117	9.3117	1	0	0	0	0	0	0	4045	England_BellBeaker_highEEF.AG	4011	Czechia_BA_BellBeaker.AG
I1767	I7280	8.927	8.927	1	0	0	0	0	0	0	4045	England_BellBeaker_highEEF.AG	4200	Czechia_EBA_CordedWare.AG
I1767	I7282	8.1605	8.1605	1	0	0	0	0	0	0	4045	England_BellBeaker_highEEF.AG	4200	Czechia_BellBeaker.AG
I1767	I7283	8.06559	8.06559	1	0	0	0	0	0	0	4045	England_BellBeaker_highEEF.AG	4200	Czechia_BellBeaker_mother.I7282.AG
I1767	I0108	11.8501	20.7456	2	0	0	0	0	0	0	4045	England_BellBeaker_highEEF.AG	4399	Germany_BellBeaker.AG
I1767	I0114	8.1324	8.1324	1	0	0	0	0	0	0	4045	England_BellBeaker_highEEF.AG	4002	Germany_EBA_Unetice_brother.I0117.AG
I1767	I0117	8.1324	8.1324	1	0	0	0	0	0	0	4045	England_BellBeaker_highEEF.AG	4092	Germany_EBA_Unetice.AG
I1767	I0461	9.6657	9.6657	1	0	0	0	0	0	0	4045	England_BellBeaker_highEEF.AG	4241	Spain_C_oSteppe.AG
I1767	I1549	8.79381	17.3312	2	0	0	0	0	0	0	4045	England_BellBeaker_highEEF.AG	4225	Germany_BellBeaker.AG
I1767	UNTA58_68Sk2	8.0492	8.0492	1	0	0	0	0	0	0	4045	England_BellBeaker_highEEF.AG	4347	Germany_Lech_BellBeaker_possible.contam.AG
I1767	BNL005	16.8286	16.8286	1	16.8286	1	16.8286	1	0	0	4045	England_BellBeaker_highEEF.AG	4084	Czechia_EBA_Unetice.AG
I1767	DRO001	8.8773	8.8773	1	0	0	0	0	0	0	4045	England_BellBeaker_highEEF.AG	4697	Czechia_EBA_CordedWare.AG
I1767	HOP001	8.3371	8.3371	1	0	0	0	0	0	0	4045	England_BellBeaker_highEEF.AG	4240	Czechia_BellBeaker.AG
I1767	KON004	9.5433	18.6235	2	0	0	0	0	0	0	4045	England_BellBeaker_highEEF.AG	4398	Czechia_EBA_CordedWare.AG
I1767	PDA002	9.1306	9.1306	1	0	0	0	0	0	0	4045	England_BellBeaker_highEEF.AG	4057	Czechia_EBA_Unetice.AG
I1767	PMI001	9.01591	9.01591	1	0	0	0	0	0	0	4045	England_BellBeaker_highEEF.AG	4096	Czechia_EBA_Unetice.AG
I1767	PNL002	8.3296	16.5656	2	0	0	0	0	0	0	4045	England_BellBeaker_highEEF.AG	4653	Czechia_EBA_CordedWare.AG
I1767	PRU002	8.1568	8.1568	1	0	0	0	0	0	0	4045	England_BellBeaker_highEEF.AG	4470	Czechia_BellBeaker.AG
I1767	TRM003	9.8939	9.8939	1	0	0	0	0	0	0	4045	England_BellBeaker_highEEF.AG	4620	Czechia_EBA_CordedWare.AG
I1767	VLI007	14.3837	14.3837	1	14.3837	1	0	0	0	0	4045	England_BellBeaker_highEEF.AG	4739	Czechia_EBA_CordedWare.AG
I1767	VLI011	18.9119	18.9119	1	18.9119	1	18.9119	1	0	0	4045	England_BellBeaker_highEEF.AG	4718	Czechia_EBA_CordedWare.AG
I1767	VLI017	10.7611	26.8573	3	0	0	0	0	0	0	4045	England_BellBeaker_highEEF.AG	4336	Czechia_EBA_CordedWare.AG
I1767	VLI029	8.6925	8.6925	1	0	0	0	0	0	0	4045	England_BellBeaker_highEEF.AG	4150	Czechia_BellBeaker.AG
I1767	VLI061	14.395	14.395	1	14.395	1	0	0	0	0	4045	England_BellBeaker_highEEF.AG	4000	Czechia_EBA_Unetice.AG
I1767	VLI067	12.2131	12.2131	1	12.2131	1	0	0	0	0	4045	England_BellBeaker_highEEF.AG	4718	Czechia_EBA_CordedWare.AG
I1767	VLI071	12.4951	21.2268	2	12.4951	1	0	0	0	0	4045	England_BellBeaker_highEEF.AG	4715	Czechia_EBA_CordedWare.AG
I1767	VLI076	17.6342	35.1106	3	17.6342	1	17.6342	1	0	0	4045	England_BellBeaker_highEEF.AG	4906	Czechia_EBA_CordedWare.AG
I1767	N44	13.6446	23.1679	2	13.6446	1	0	0	0	0	4045	England_BellBeaker_highEEF.AG	4400	Poland_CordedWare_3.SG
I1767	N45	10.9424	10.9424	1	0	0	0	0	0	0	4045	England_BellBeaker_highEEF.AG	4375	Poland_CordedWare_3.SG
I1767	N49	10.4634	10.4634	1	0	0	0	0	0	0	4045	England_BellBeaker_highEEF.AG	4375	Poland_CordedWare_1.SG
I1767	MX188	14.4344	14.4344	1	14.4344	1	0	0	0	0	4045	England_BellBeaker_highEEF.AG	4399	Switzerland_EBA_2.AG
I1767	pcw070	9.6148	9.6148	1	0	0	0	0	0	0	4045	England_BellBeaker_highEEF.AG	4321	Poland_Southeast_CordedWare.SG
I1767	pcw260	8.10319	8.10319	1	0	0	0	0	0	0	4045	England_BellBeaker_highEEF.AG	4237	Poland_Southeast_BellBeaker.SG
I1767	poz81	12.045	38.1692	4	12.045	1	0	0	0	0	4045	England_BellBeaker_highEEF.AG	4702	Poland_CordedWare.SG
I1767	Plinkaigalis242	9.0475	17.186	2	0	0	0	0	0	0	4045	England_BellBeaker_highEEF.AG	4842	Lithuania_LN.AG
I1767	GBVPK	11.7917	20.8592	2	0	0	0	0	0	0	4045	England_BellBeaker_highEEF.AG	4336	France_LaClape_LN_EMBA_BellBeakerPossible.SG
I1767	RISE98	9.64551	9.64551	1	0	0	0	0	0	0	4045	England_BellBeaker_highEEF.AG	4082	Sweden_LN.SG
I1767	I13467	10.8233	10.8233	1	0	0	0	0	0	0	4045	England_BellBeaker_highEEF.AG	4289	Czechia_EBA_CordedWare_2_dup.I13467.AG
I1767	I27380	13.8266	13.8266	1	13.8266	1	0	0	0	0	4045	England_BellBeaker_highEEF.AG	4228	England_EBA_BellBeaker.AG
I1767	I13893	8.40731	8.40731	1	0	0	0	0	0	0	4045	England_BellBeaker_highEEF.AG	5517	England_N_Megalithic.AG
I1767	I2443	10.1843	10.1843	1	0	0	0	0	0	0	4045	England_BellBeaker_highEEF.AG	4091	England_BellBeaker.AG
I1767	FRA201	11.2243	11.2243	1	0	0	0	0	0	0	4045	England_BellBeaker_highEEF.AG	4322	Sweden_Fralsegarden_Steppe1.SG
I1767	FRA202	16.0801	24.2071	2	16.0801	1	16.0801	1	0	0	4045	England_BellBeaker_highEEF.AG	4348	Sweden_Fralsegarden_Steppe1.SG
I1838	I3269	21.7626	35.9705	2	35.9705	2	21.7626	1	21.7626	1	5126	Spain_C.AG	4850	Spain_C.AG
I1838	I1978	12.0453	28.7481	3	12.0453	1	0	0	0	0	5126	Spain_C.AG	4825	Spain_C.AG
I1838	I4565	9.0375	9.0375	1	0	0	0	0	0	0	5126	Spain_C.AG	4915	Spain_C.AG
I1838	I7606	27.6492	27.6492	1	27.6492	1	27.6492	1	27.6492	1	5126	Spain_C.AG	5050	Spain_MLN.AG
I1838	TORTE	8.33549	8.33549	1	0	0	0	0	0	0	5126	Spain_C.AG	4574	France_LaClape_LN_EBA_Veraza.SG
I1838	I15035	8.9651	17.5118	2	0	0	0	0	0	0	5126	Spain_C.AG	5000	France_N.AG
I1838	KH180054	8.0233	8.0233	1	0	0	0	0	0	0	5126	Spain_C.AG	5177	Germany_Altendorf
I1838	KH180131	8.6609	8.6609	1	0	0	0	0	0	0	5126	Spain_C.AG	5080	Germany_Altendorf
I1838	KH180077	9.02702	9.02702	1	0	0	0	0	0	0	5126	Spain_C.AG	5150	Germany_Warburg
I1838	KH180120	10.9234	10.9234	1	0	0	0	0	0	0	5126	Spain_C.AG	5150	Germany_Warburg
I1838	KH180126	9.56559	9.56559	1	0	0	0	0	0	0	5126	Spain_C.AG	5150	Germany_Warburg
I1838	KH210914	10.3391	10.3391	1	0	0	0	0	0	0	5126	Spain_C.AG	5225	Germany_Sorsum
I1838	KH210923	8.3117	8.3117	1	0	0	0	0	0	0	5126	Spain_C.AG	5225	Germany_Sorsum
I1838	KH200127_KH200128_KH201232	10.9767	10.9767	1	0	0	0	0	0	0	5126	Spain_C.AG	5150	Germany_Warburg
I2417	I3601	11.2771	11.2771	1	0	0	0	0	0	0	4250	England_BellBeaker_lowEEF.AG	4175	Germany_BellBeaker.AG
I2417	I5379	10.1968	10.1968	1	0	0	0	0	0	0	4250	England_BellBeaker_lowEEF.AG	4333	England_BellBeaker_highEEF.AG
I2417	I6531	8.3149	8.3149	1	0	0	0	0	0	0	4250	England_BellBeaker_lowEEF.AG	4113	Poland_ChopiceVeseleCulture.AG
I2417	I6579	8.3316	8.3316	1	0	0	0	0	0	0	4250	England_BellBeaker_lowEEF.AG	4155	Poland_EBA.AG
I2417	I6582	11.1288	11.1288	1	0	0	0	0	0	0	4250	England_BellBeaker_lowEEF.AG	4171	Poland_BellBeaker.AG
I2417	I6583	10.3071	20.0882	2	0	0	0	0	0	0	4250	England_BellBeaker_lowEEF.AG	4138	Poland_BellBeaker.AG
I2417	I0103	11.6044	11.6044	1	0	0	0	0	0	0	4250	England_BellBeaker_lowEEF.AG	4472	Germany_CordedWare.AG
I2417	I0104	9.6086	9.6086	1	0	0	0	0	0	0	4250	England_BellBeaker_lowEEF.AG	4358	Germany_CordedWare.AG
I2417	I11442	11.776	11.776	1	0	0	0	0	0	0	4250	England_BellBeaker_lowEEF.AG	4120	Italy_Sicily_EBA.AG
I2417	I2365	11.1567	11.1567	1	0	0	0	0	0	0	4250	England_BellBeaker_lowEEF.AG	4299	Hungary_EBA_BellBeaker.AG
I2417	I2445	13.4547	13.4547	1	13.4547	1	0	0	0	0	4250	England_BellBeaker_lowEEF.AG	4048	England_BellBeaker.AG
I2417	I2450	8.5804	8.5804	1	0	0	0	0	0	0	4250	England_BellBeaker_lowEEF.AG	4248	England_BellBeaker.AG
I2417	I2452	8.7711	8.7711	1	0	0	0	0	0	0	4250	England_BellBeaker_lowEEF.AG	4052	England_BellBeaker.AG
I2417	I2454	10.5742	10.5742	1	0	0	0	0	0	0	4250	England_BellBeaker_lowEEF.AG	4042	England_BellBeaker_lowEEF.AG
I2417	I2457	16.9219	16.9219	1	16.9219	1	16.9219	1	0	0	4250	England_BellBeaker_lowEEF.AG	4056	England_C_EBA.AG
I2417	I2597	25.0512	67.3935	4	56.1401	3	42.1659	2	25.0512	1	4250	England_BellBeaker_lowEEF.AG	4080	England_C_EBA.AG
I2417	I2604	17.9068	28.8754	2	17.9068	1	17.9068	1	0	0	4250	England_BellBeaker_lowEEF.AG	4073	England_C_EBA.AG
I2417	I4074	9.9382	9.9382	1	0	0	0	0	0	0	4250	England_BellBeaker_lowEEF.AG	4030	Netherlands_LNB_BellBeaker.AG
I2417	I4889	10.4236	20.4655	2	0	0	0	0	0	0	4250	England_BellBeaker_lowEEF.AG	4131	Czechia_BellBeaker.AG
I2417	I4895	8.925	8.925	1	0	0	0	0	0	0	4250	England_BellBeaker_lowEEF.AG	4106	Czechia_BellBeaker.AG
I2417	I4896	9.5069	9.5069	1	0	0	0	0	0	0	4250	England_BellBeaker_lowEEF.AG	4163	Czechia_BellBeaker.AG
I2417	I4950	28.9125	82.1817	5	72.4502	4	28.9125	1	28.9125	1	4250	England_BellBeaker_lowEEF.AG	4250	England_BellBeaker.AG
I2417	I5512	18.3136	28.8129	2	18.3136	1	18.3136	1	0	0	4250	England_BellBeaker_lowEEF.AG	4250	England_BellBeaker.AG
I2417	I5513	9.3643	9.3643	1	0	0	0	0	0	0	4250	England_BellBeaker_lowEEF.AG	4250	England_BellBeaker.AG
I2417	I5514	12.7582	43.7149	4	24.8573	2	0	0	0	0	4250	England_BellBeaker_lowEEF.AG	4155	Czechia_BellBeaker.AG
I2417	I5748	13.5582	22.2391	2	13.5582	1	0	0	0	0	4250	England_BellBeaker_lowEEF.AG	4383	Netherlands_LNB_BellBeaker.AG
I2417	I5834	9.9376	9.9376	1	0	0	0	0	0	0	4250	England_BellBeaker_lowEEF.AG	4200	Germany_BellBeaker.AG
I2417	I5835	8.524	8.524	1	0	0	0	0	0	0	4250	England_BellBeaker_lowEEF.AG	4200	Germany_BellBeaker_father.or.son.I1533.AG
I2417	I6696	8.433	8.433	1	0	0	0	0	0	0	4250	England_BellBeaker_lowEEF.AG	4575	Czechia_EBA_CordedWare.SG
I2417	I6777	9.2898	9.2898	1	0	0	0	0	0	0	4250	England_BellBeaker_lowEEF.AG	4050	England_C_EBA.AG
I2417	I7198	11.3317	11.3317	1	0	0	0	0	0	0	4250	England_BellBeaker_lowEEF.AG	4026	Czechia_EBA.AG
I2417	I7199	16.5264	26.2423	2	16.5264	1	16.5264	1	0	0	4250	England_BellBeaker_lowEEF.AG	4039	Czechia_EBA.AG
I2417	I7200	11.1104	11.1104	1	0	0	0	0	0	0	4250	England_BellBeaker_lowEEF.AG	4250	Czechia_EBA.AG
I2417	I7205	8.525	8.525	1	0	0	0	0	0	0	4250	England_BellBeaker_lowEEF.AG	4200	Czechia_BellBeaker.AG
I2417	I7207	9.5909	17.6596	2	0	0	0	0	0	0	4250	England_BellBeaker_lowEEF.AG	4370	Czechia_EBA_CordedWare.AG
I2417	I7209	9.448	17.91	2	0	0	0	0	0	0	4250	England_BellBeaker_lowEEF.AG	4269	Czechia_EBA_CordedWare.AG
I2417	I7210	9.9104	9.9104	1	0	0	0	0	0	0	4250	England_BellBeaker_lowEEF.AG	4071	Czechia_BellBeaker_father.or.son.I7212.AG
I2417	I7212	9.8153	9.8153	1	0	0	0	0	0	0	4250	England_BellBeaker_lowEEF.AG	4247	Czechia_BellBeaker.AG
I2417	I7213	10.5468	10.5468	1	0	0	0	0	0	0	4250	England_BellBeaker_lowEEF.AG	4231	Czechia_BellBeaker.AG
I2417	I7214	14.6578	14.6578	1	14.6578	1	0	0	0	0	4250	England_BellBeaker_lowEEF.AG	4200	Czechia_BellBeaker.AG
I2417	I7251	17.8274	29.448	2	17.8274	1	17.8274	1	0	0	4250	England_BellBeaker_lowEEF.AG	4200	Czechia_BA_BellBeaker.AG
I2417	I7275	12.003	12.003	1	12.003	1	0	0	0	0	4250	England_BellBeaker_lowEEF.AG	4200	Czechia_BA_BellBeaker.AG
I2417	I7278	10.5489	28.5303	3	0	0	0	0	0	0	4250	England_BellBeaker_lowEEF.AG	4333	Czechia_BA_BellBeaker.AG
I2417	I7282	16.3428	27.5326	2	16.3428	1	16.3428	1	0	0	4250	England_BellBeaker_lowEEF.AG	4200	Czechia_BellBeaker.AG
I2417	I7283	11.3536	11.3536	1	0	0	0	0	0	0	4250	England_BellBeaker_lowEEF.AG	4200	Czechia_BellBeaker_mother.I7282.AG
I2417	I7289	11.9795	11.9795	1	0	0	0	0	0	0	4250	England_BellBeaker_lowEEF.AG	4289	Czechia_BellBeaker_sibling.I7214.AG
I2417	I7290	12.3991	12.3991	1	12.3991	1	0	0	0	0	4250	England_BellBeaker_lowEEF.AG	4200	Czechia_BellBeaker.AG
I2417	I8561	9.2556	9.2556	1	0	0	0	0	0	0	4250	England_BellBeaker_lowEEF.AG	4212	Italy_Sicily_EBA_o1.AG
I2417	I0059	12.0586	20.1654	2	12.0586	1	0	0	0	0	4250	England_BellBeaker_lowEEF.AG	4179	Germany_BenzigerodeHeimburg_LN.AG
I2417	I0108	11.1199	11.1199	1	0	0	0	0	0	0	4250	England_BellBeaker_lowEEF.AG	4399	Germany_BellBeaker.AG
I2417	I0117	13.6137	13.6137	1	13.6137	1	0	0	0	0	4250	England_BellBeaker_lowEEF.AG	4092	Germany_EBA_Unetice.AG
I2417	I1549	11.4966	21.1069	2	0	0	0	0	0	0	4250	England_BellBeaker_lowEEF.AG	4225	Germany_BellBeaker.AG
I2417	HUGO_168	13.0562	24.2182	2	13.0562	1	0	0	0	0	4250	England_BellBeaker_lowEEF.AG	4167	Germany_Lech_BellBeaker_possible.contam.AG
I2417	BNL005	11.9663	23.0595	2	0	0	0	0	0	0	4250	England_BellBeaker_lowEEF.AG	4084	Czechia_EBA_Unetice.AG
I2417	CAH010	9.25559	26.5546	3	0	0	0	0	0	0	4250	England_BellBeaker_lowEEF.AG	4275	Czechia_EBA_CordedWare.AG
I2417	HOP003	8.5398	8.5398	1	0	0	0	0	0	0	4250	England_BellBeaker_lowEEF.AG	4250	Czechia_BellBeaker.AG
I2417	KO1004	12.5898	12.5898	1	12.5898	1	0	0	0	0	4250	England_BellBeaker_lowEEF.AG	4166	Czechia_BellBeaker.AG
I2417	KON004	10.5152	19.0798	2	0	0	0	0	0	0	4250	England_BellBeaker_lowEEF.AG	4398	Czechia_EBA_CordedWare.AG
I2417	OHR002	12.9846	25.7843	2	25.7843	2	0	0	0	0	4250	England_BellBeaker_lowEEF.AG	4477	Czechia_EBA_CordedWare.AG
I2417	PDA002	15.0366	27.2626	2	27.2626	2	0	0	0	0	4250	England_BellBeaker_lowEEF.AG	4057	Czechia_EBA_Unetice.AG
I2417	PMI001	10.3242	10.3242	1	0	0	0	0	0	0	4250	England_BellBeaker_lowEEF.AG	4096	Czechia_EBA_Unetice.AG
I2417	PNL002	15.3911	23.595	2	15.3911	1	0	0	0	0	4250	England_BellBeaker_lowEEF.AG	4653	Czechia_EBA_CordedWare.AG
I2417	PRU002	10.1876	18.4377	2	0	0	0	0	0	0	4250	England_BellBeaker_lowEEF.AG	4470	Czechia_BellBeaker.AG
I2417	ROU007	8.3793	8.3793	1	0	0	0	0	0	0	4250	England_BellBeaker_lowEEF.AG	4000	Czechia_EBA_Unetice.AG
I2417	STD002	8.8537	8.8537	1	0	0	0	0	0	0	4250	England_BellBeaker_lowEEF.AG	4720	Czechia_EBA_CordedWare.AG
I2417	TRM003	11.9678	11.9678	1	0	0	0	0	0	0	4250	England_BellBeaker_lowEEF.AG	4620	Czechia_EBA_CordedWare.AG
I2417	VLI007	14.0067	23.0782	2	14.0067	1	0	0	0	0	4250	England_BellBeaker_lowEEF.AG	4739	Czechia_EBA_CordedWare.AG
I2417	VLI010	10.5346	20.3768	2	0	0	0	0	0	0	4250	England_BellBeaker_lowEEF.AG	4483	Czechia_EBA_CordedWare.AG
I2417	VLI011	9.96261	9.96261	1	0	0	0	0	0	0	4250	England_BellBeaker_lowEEF.AG	4718	Czechia_EBA_CordedWare.AG
I2417	VLI016	10.8356	10.8356	1	0	0	0	0	0	0	4250	England_BellBeaker_lowEEF.AG	4345	Czechia_EBA_CordedWare.AG
I2417	VLI017	9.2164	9.2164	1	0	0	0	0	0	0	4250	England_BellBeaker_lowEEF.AG	4336	Czechia_EBA_CordedWare.AG
I2417	VLI020	10.8547	20.2737	2	0	0	0	0	0	0	4250	England_BellBeaker_lowEEF.AG	4446	Czechia_EBA_CordedWare.AG
I2417	VLI029	17.0668	25.7751	2	17.0668	1	17.0668	1	0	0	4250	England_BellBeaker_lowEEF.AG	4150	Czechia_BellBeaker.AG
I2417	VLI071	8.4422	8.4422	1	0	0	0	0	0	0	4250	England_BellBeaker_lowEEF.AG	4715	Czechia_EBA_CordedWare.AG
I2417	VLI076	14.4566	38.4528	3	28.0277	2	0	0	0	0	4250	England_BellBeaker_lowEEF.AG	4906	Czechia_EBA_CordedWare.AG
I2417	VLI092	9.7919	9.7919	1	0	0	0	0	0	0	4250	England_BellBeaker_lowEEF.AG	4719	Czechia_EBA_CordedWare.AG
I2417	N44	10.5241	10.5241	1	0	0	0	0	0	0	4250	England_BellBeaker_lowEEF.AG	4400	Poland_CordedWare_3.SG
I2417	N45	11.7766	11.7766	1	0	0	0	0	0	0	4250	England_BellBeaker_lowEEF.AG	4375	Poland_CordedWare_3.SG
I2417	N47	14.89	14.89	1	14.89	1	0	0	0	0	4250	England_BellBeaker_lowEEF.AG	4375	Poland_CordedWare_1.SG
I2417	N49	11.4649	11.4649	1	0	0	0	0	0	0	4250	England_BellBeaker_lowEEF.AG	4375	Poland_CordedWare_1.SG
I2417	pcw070	15.8645	24.2397	2	15.8645	1	0	0	0	0	4250	England_BellBeaker_lowEEF.AG	4321	Poland_Southeast_CordedWare.SG
I2417	pcw211	8.2051	8.2051	1	0	0	0	0	0	0	4250	England_BellBeaker_lowEEF.AG	4300	Poland_Southeast_CordedWare.SG
I2417	pcw260	9.278	9.278	1	0	0	0	0	0	0	4250	England_BellBeaker_lowEEF.AG	4237	Poland_Southeast_BellBeaker.SG
I2417	pcw361	14.8097	33.6096	3	14.8097	1	0	0	0	0	4250	England_BellBeaker_lowEEF.AG	4300	Poland_Southeast_CordedWare.SG
I2417	pcw362	8.7502	8.7502	1	0	0	0	0	0	0	4250	England_BellBeaker_lowEEF.AG	4305	Poland_Southeast_CordedWare.SG
I2417	ber1	11.4783	31.0041	3	0	0	0	0	0	0	4250	England_BellBeaker_lowEEF.AG	4483	Sweden_BAC.SG
I2417	Plinkaigalis242	8.6199	25.051	3	0	0	0	0	0	0	4250	England_BellBeaker_lowEEF.AG	4842	Lithuania_LN.AG
I2417	ans017	8.4672	8.4672	1	0	0	0	0	0	0	4250	England_BellBeaker_lowEEF.AG	5053	Sweden_Ansarve_Megalithic.SG
I2417	RISE1159	15.1807	15.1807	1	15.1807	1	0	0	0	0	4250	England_BellBeaker_lowEEF.AG	4724	Poland_Koszyce_GlobularAmphora.SG
I2417	RISE1160	16.4138	16.4138	1	16.4138	1	16.4138	1	0	0	4250	England_BellBeaker_lowEEF.AG	4721	Poland_Koszyce_GlobularAmphora_son.RISE1159.son.RISE1168.SG
I2417	RISE94	10.8968	28.4969	3	0	0	0	0	0	0	4250	England_BellBeaker_lowEEF.AG	4487	Sweden_BattleAxe.SG
I2417	I13028	10.7959	10.7959	1	0	0	0	0	0	0	4250	England_BellBeaker_lowEEF.AG	4250	Netherlands_LNB_BellBeaker.AG
I2417	I27380	9.3704	9.3704	1	0	0	0	0	0	0	4250	England_BellBeaker_lowEEF.AG	4228	England_EBA_BellBeaker.AG
I2417	NEO870	8.85841	8.85841	1	0	0	0	0	0	0	4250	England_BellBeaker_lowEEF.AG	4210	Denmark_SouthScandinavia_LN.SG
I2417	NEO92	10.0866	19.1602	2	0	0	0	0	0	0	4250	England_BellBeaker_lowEEF.AG	4173	Denmark_SouthScandinavia_LN.SG
I2417	I2443	10.4037	10.4037	1	0	0	0	0	0	0	4250	England_BellBeaker_lowEEF.AG	4091	England_BellBeaker.AG
I2417	FRA201	8.4151	8.4151	1	0	0	0	0	0	0	4250	England_BellBeaker_lowEEF.AG	4322	Sweden_Fralsegarden_Steppe1.SG
I2417	FRA202	10.9023	10.9023	1	0	0	0	0	0	0	4250	England_BellBeaker_lowEEF.AG	4348	Sweden_Fralsegarden_Steppe1.SG
I2417	NAS003	8.2231	8.2231	1	0	0	0	0	0	0	4250	England_BellBeaker_lowEEF.AG	4022	Sweden_Nastegarden_Steppe2.SG
I2417	KH150618	9.8839	9.8839	1	0	0	0	0	0	0	4250	England_BellBeaker_lowEEF.AG	5250	Germany_Niedertiefenbach
I2417	KH150621	8.4094	8.4094	1	0	0	0	0	0	0	4250	England_BellBeaker_lowEEF.AG	5250	Germany_Niedertiefenbach
I2417	KH170035_KH210851	9.3347	9.3347	1	0	0	0	0	0	0	4250	England_BellBeaker_lowEEF.AG	5225	Germany_Sorsum
I2417	KH170066	9.3938	17.5808	2	0	0	0	0	0	0	4250	England_BellBeaker_lowEEF.AG	5225	Germany_Sorsum
I2417	KH210846	9.9162	9.9162	1	0	0	0	0	0	0	4250	England_BellBeaker_lowEEF.AG	5225	Germany_Sorsum
I2417	KH210852	8.1695	8.1695	1	0	0	0	0	0	0	4250	England_BellBeaker_lowEEF.AG	5225	Germany_Sorsum
I2417	KH200134_KH201258	8.7466	8.7466	1	0	0	0	0	0	0	4250	England_BellBeaker_lowEEF.AG	5150	Germany_Warburg
I2417	KH200229	10.9006	10.9006	1	0	0	0	0	0	0	4250	England_BellBeaker_lowEEF.AG	5150	Germany_Warburg
I2477	I2741	14.5436	28.1993	2	28.1993	2	0	0	0	0	4015	Italy_North_BellBeaker_2.AG	4245	Hungary_EBA_BellBeaker.AG
I2477	I4074	8.6629	8.6629	1	0	0	0	0	0	0	4015	Italy_North_BellBeaker_2.AG	4030	Netherlands_LNB_BellBeaker.AG
I2477	BG72	8.587	8.587	1	0	0	0	0	0	0	4015	Italy_North_BellBeaker_2.AG	5467	Ireland_MN.SG
I2477	KH180137_KH182329	9.43699	9.43699	1	0	0	0	0	0	0	4015	Italy_North_BellBeaker_2.AG	5137	Germany_Altendorf
I2477	KH180391	8.4141	8.4141	1	0	0	0	0	0	0	4015	Italy_North_BellBeaker_2.AG	5170	Germany_Rimbeck
I2630	I2637	8.6298	8.6298	1	0	0	0	0	0	0	4471	Scotland_N.AG	5375	Scotland_N.AG
I2630	I2651	13.7435	13.7435	1	13.7435	1	0	0	0	0	4471	Scotland_N.AG	5160	Scotland_N.AG
I2630	I2932	15.8231	51.8769	4	43.7738	3	0	0	0	0	4471	Scotland_N.AG	4433	Scotland_N.AG
I2630	I2933	11.4126	11.4126	1	0	0	0	0	0	0	4471	Scotland_N.AG	4877	Scotland_N.AG
I2630	I2935	11.0205	19.502	2	0	0	0	0	0	0	4471	Scotland_N.AG	5115	Scotland_N.AG
I2630	I2979	8.19421	16.1986	2	0	0	0	0	0	0	4471	Scotland_N.AG	5104	Scotland_N.AG
I2630	I3041	9.9021	9.9021	1	0	0	0	0	0	0	4471	Scotland_N.AG	5440	Scotland_N_lowEEF.AG
I2630	I3133	11.5009	11.5009	1	0	0	0	0	0	0	4471	Scotland_N.AG	5446	Scotland_N.AG
I2630	I3138	8.5591	8.5591	1	0	0	0	0	0	0	4471	Scotland_N.AG	4998	Scotland_N.AG
I2630	PN10_PN113	9.8294	9.8294	1	0	0	0	0	0	0	4471	Scotland_N.AG	5746	Ireland_EN.SG
I2630	611	9.15411	9.15411	1	0	0	0	0	0	0	4471	Scotland_N.AG	5418	England_Trumpington_N.SG
I2630	613	9.15411	9.15411	1	0	0	0	0	0	0	4471	Scotland_N.AG	5639	England_Trumpington_N_brother.TRPTN_611.SG
I2630	I16424	14.8905	14.8905	1	14.8905	1	0	0	0	0	4471	Scotland_N.AG	4106	England_C_EBA.AG
I2630	I20818	9.0959	17.989	2	0	0	0	0	0	0	4471	Scotland_N.AG	5545	England_N_Megalithic.TW
I2630	I13897	8.3631	8.3631	1	0	0	0	0	0	0	4471	Scotland_N.AG	5600	England_N_Megalithic_lc.TW
I2630	I13899	9.55321	9.55321	1	0	0	0	0	0	0	4471	Scotland_N.AG	5600	England_N_Megalithic.TW
I2630	NEO625	11.1184	11.1184	1	0	0	0	0	0	0	4471	Scotland_N.AG	5138	Great_Britain_Orkney_N_father.NEO624.SG
I2631	I2635	13.137	47.7463	5	13.137	1	0	0	0	0	4957	Scotland_N.AG	5523	Scotland_N.AG
I2631	I2637	30.7973	88.0359	6	61.2125	3	47.9492	2	30.7973	1	4957	Scotland_N.AG	5375	Scotland_N.AG
I2631	I2650	13.2342	13.2342	1	13.2342	1	0	0	0	0	4957	Scotland_N.AG	5375	Scotland_N.AG
I2631	I2651	9.1428	17.17	2	0	0	0	0	0	0	4957	Scotland_N.AG	5160	Scotland_N.AG
I2631	I2691	10.8889	10.8889	1	0	0	0	0	0	0	4957	Scotland_N.AG	5613	Scotland_N_mediumlowEEF.AG
I2631	I2934	8.3206	8.3206	1	0	0	0	0	0	0	4957	Scotland_N.AG	5138	Scotland_N.AG
I2631	I2935	23.9715	55.4704	4	36.3667	2	23.9715	1	23.9715	1	4957	Scotland_N.AG	5115	Scotland_N.AG
I2631	I2978	13.545	21.9902	2	13.545	1	0	0	0	0	4957	Scotland_N.AG	5140	Scotland_N.AG
I2631	I2979	16.7748	47.1689	4	16.7748	1	16.7748	1	0	0	4957	Scotland_N.AG	5104	Scotland_N.AG
I2631	I2980	18.1871	53.3921	4	31.5942	2	18.1871	1	0	0	4957	Scotland_N.AG	5173	Scotland_N.AG
I2631	I3085	14.835	23.6392	2	14.835	1	0	0	0	0	4957	Scotland_N.AG	5149	Scotland_N.AG
I2631	I3133	8.2984	8.2984	1	0	0	0	0	0	0	4957	Scotland_N.AG	5446	Scotland_N.AG
I2631	I3135	8.9037	8.9037	1	0	0	0	0	0	0	4957	Scotland_N.AG	5517	Scotland_N_lowEEF.AG
I2631	I5359	8.314	8.314	1	0	0	0	0	0	0	4957	Scotland_N.AG	5600	Wales_N.AG
I2631	I5366	9.263	17.4064	2	0	0	0	0	0	0	4957	Scotland_N.AG	5516	England_N.AG
I2631	I2636	17.5721	89.2998	6	77.6526	5	17.5721	1	0	0	4957	Scotland_N.AG	5397	Scotland_N.AG
I2631	I6753	10.6742	30.2655	3	0	0	0	0	0	0	4957	Scotland_N.AG	5305	England_N.AG
I2631	I7554	29.6503	50.9031	3	29.6503	1	29.6503	1	29.6503	1	4957	Scotland_N.AG	5182	Scotland_N.AG
I2631	I6762	11.5534	11.5534	1	0	0	0	0	0	0	4957	Scotland_N.AG	5700	England_N.AG
I2631	ANN1	9.9029	9.9029	1	0	0	0	0	0	0	4957	Scotland_N.AG	5405	Ireland_MN.SG
I2631	ARD2	8.02549	8.02549	1	0	0	0	0	0	0	4957	Scotland_N.AG	5401	Ireland_MN.SG
I2631	PB186	10.0598	10.0598	1	0	0	0	0	0	0	4957	Scotland_N.AG	5393	Ireland_MN.SG
I2631	PB357	9.0279	9.0279	1	0	0	0	0	0	0	4957	Scotland_N.AG	5545	Ireland_EN_MN.SG
I2631	PB675	9.7244	9.7244	1	0	0	0	0	0	0	4957	Scotland_N.AG	5171	Ireland_MN.SG
I2631	PN03	8.06991	8.06991	1	0	0	0	0	0	0	4957	Scotland_N.AG	5460	Ireland_MN.SG
I2631	PN07	10.9949	10.9949	1	0	0	0	0	0	0	4957	Scotland_N.AG	5410	Ireland_MN.SG
I2631	bal004	14.0607	14.0607	1	14.0607	1	0	0	0	0	4957	Scotland_N.AG	5186	Scotland_Megalithic.SG
I2631	611	8.275	8.275	1	0	0	0	0	0	0	4957	Scotland_N.AG	5418	England_Trumpington_N.SG
I2631	RISE1247	8.196	8.196	1	0	0	0	0	0	0	4957	Scotland_N.AG	4725	Poland_Ksiaznice_GlobularAmphora_mother.or.daughter.RISE1248.SG
I2631	I13889	8.2757	8.2757	1	0	0	0	0	0	0	4957	Scotland_N.AG	5624	England_N_Megalithic.AG
I2631	I13892	8.17621	8.17621	1	0	0	0	0	0	0	4957	Scotland_N.AG	5677	England_N_Megalithic.AG
I2631	I21390	12.2476	12.2476	1	12.2476	1	0	0	0	0	4957	Scotland_N.AG	5630	England_N_Megalithic.AG
I2631	I30300	14.0769	14.0769	1	14.0769	1	0	0	0	0	4957	Scotland_N.AG	5575	England_N_Megalithic.TW
I2631	I13899	8.6905	8.6905	1	0	0	0	0	0	0	4957	Scotland_N.AG	5600	England_N_Megalithic.TW
I2631	I20821	8.0496	8.0496	1	0	0	0	0	0	0	4957	Scotland_N.AG	5486	England_N_Megalithic.TW
I2631	NEO624	11.4521	11.4521	1	0	0	0	0	0	0	4957	Scotland_N.AG	4903	Great_Britain_Orkney_N.SG
I2631	NEO625	11.8742	28.5686	3	0	0	0	0	0	0	4957	Scotland_N.AG	5138	Great_Britain_Orkney_N_father.NEO624.SG
I2631	HJE010	9.6495	9.6495	1	0	0	0	0	0	0	4957	Scotland_N.AG	5075	Sweden_HjelmarsRor_N.SG
I2631	KH150641	10.2911	10.2911	1	0	0	0	0	0	0	4957	Scotland_N.AG	5250	Germany_Niedertiefenbach
I2631	KH180068	8.568	8.568	1	0	0	0	0	0	0	4957	Scotland_N.AG	5150	Germany_Warburg
I2631	KH210837	9.4248	9.4248	1	0	0	0	0	0	0	4957	Scotland_N.AG	5225	Germany_Sorsum
I2631	KH210846	9.4351	17.937	2	0	0	0	0	0	0	4957	Scotland_N.AG	5225	Germany_Sorsum
I2631	KH210854	8.0959	8.0959	1	0	0	0	0	0	0	4957	Scotland_N.AG	5225	Germany_Sorsum
I2631	KH210858_KH210949	10.0229	10.0229	1	0	0	0	0	0	0	4957	Scotland_N.AG	5225	Germany_Sorsum
I2631	KH210929	8.1162	8.1162	1	0	0	0	0	0	0	4957	Scotland_N.AG	5225	Germany_Sorsum
I2631	KH210930_KH210945	8.9249	8.9249	1	0	0	0	0	0	0	4957	Scotland_N.AG	5225	Germany_Sorsum
I2633	I2635	37.3451	98.3896	6	62.0191	2	62.0191	2	62.0191	2	5639	Scotland_N.AG	5523	Scotland_N.AG
I2633	I2650	12.7399	22.497	2	12.7399	1	0	0	0	0	5639	Scotland_N.AG	5375	Scotland_N.AG
I2633	I2651	38.1021	206.491	10	185.624	8	159.707	6	159.707	6	5639	Scotland_N.AG	5160	Scotland_N.AG
I2633	I2659	8.7256	8.7256	1	0	0	0	0	0	0	5639	Scotland_N.AG	5637	Scotland_N.AG
I2633	I2691	23.4772	23.4772	1	23.4772	1	23.4772	1	23.4772	1	5639	Scotland_N.AG	5613	Scotland_N_mediumlowEEF.AG
I2633	I2741	9.15321	9.15321	1	0	0	0	0	0	0	5639	Scotland_N.AG	4245	Hungary_EBA_BellBeaker.AG
I2633	I2932	8.6486	8.6486	1	0	0	0	0	0	0	5639	Scotland_N.AG	4433	Scotland_N.AG
I2633	I2933	8.6653	8.6653	1	0	0	0	0	0	0	5639	Scotland_N.AG	4877	Scotland_N.AG
I2633	I2934	23.2668	53.9638	4	35.4579	2	23.2668	1	23.2668	1	5639	Scotland_N.AG	5138	Scotland_N.AG
I2633	I2935	12.7392	31.9355	3	12.7392	1	0	0	0	0	5639	Scotland_N.AG	5115	Scotland_N.AG
I2633	I2978	21.9354	30.9477	2	21.9354	1	21.9354	1	21.9354	1	5639	Scotland_N.AG	5140	Scotland_N.AG
I2633	I2980	15.9943	24.4893	2	15.9943	1	0	0	0	0	5639	Scotland_N.AG	5173	Scotland_N.AG
I2633	I2988	8.9772	8.9772	1	0	0	0	0	0	0	5639	Scotland_N.AG	5398	Scotland_N.AG
I2633	I3005	8.5601	8.5601	1	0	0	0	0	0	0	5639	Scotland_N.AG	5657	England_N.AG
I2633	I3085	10.0504	18.7623	2	0	0	0	0	0	0	5639	Scotland_N.AG	5149	Scotland_N.AG
I2633	I3133	10.8146	10.8146	1	0	0	0	0	0	0	5639	Scotland_N.AG	5446	Scotland_N.AG
I2633	I3134	9.69821	17.9754	2	0	0	0	0	0	0	5639	Scotland_N.AG	5461	Scotland_N.AG
I2633	I3138	10.5689	28.8875	3	0	0	0	0	0	0	5639	Scotland_N.AG	4998	Scotland_N.AG
I2633	I2636	47.4154	213.482	8	195.539	6	180.25	5	180.25	5	5639	Scotland_N.AG	5397	Scotland_N.AG
I2633	I6746	9.3467	26.6742	3	0	0	0	0	0	0	5639	Scotland_N.AG	5526	England_N.AG
I2633	I6753	14.2098	33.2841	3	14.2098	1	0	0	0	0	5639	Scotland_N.AG	5305	England_N.AG
I2633	I6757	8.87311	8.87311	1	0	0	0	0	0	0	5639	Scotland_N.AG	5493	England_N.AG
I2633	I6759	13.7395	34.5651	3	26.4003	2	0	0	0	0	5639	Scotland_N.AG	5527	England_N.AG
I2633	I7554	10.2354	10.2354	1	0	0	0	0	0	0	5639	Scotland_N.AG	5182	Scotland_N.AG
I2633	I6755	9.4918	9.4918	1	0	0	0	0	0	0	5639	Scotland_N.AG	5528	England_N.AG
I2633	ARD2	8.2946	8.2946	1	0	0	0	0	0	0	5639	Scotland_N.AG	5401	Ireland_MN.SG
I2633	ASH3	9.8677	18.3763	2	0	0	0	0	0	0	5639	Scotland_N.AG	5609	Ireland_EN_MN.SG
I2633	BG72	12.6622	20.9226	2	12.6622	1	0	0	0	0	5639	Scotland_N.AG	5467	Ireland_MN.SG
I2633	MB6	9.50999	9.50999	1	0	0	0	0	0	0	5639	Scotland_N.AG	5192	Ireland_MN.SG
I2633	PB1327	17.0823	59.9506	5	29.9719	2	17.0823	1	0	0	5639	Scotland_N.AG	5407	Ireland_MN.SG
I2633	PB357	10.9888	10.9888	1	0	0	0	0	0	0	5639	Scotland_N.AG	5545	Ireland_EN_MN.SG
I2633	PB443	10.5224	10.5224	1	0	0	0	0	0	0	5639	Scotland_N.AG	5474	Ireland_MN.SG
I2633	PB581	14.1186	14.1186	1	14.1186	1	0	0	0	0	5639	Scotland_N.AG	5413	Ireland_MN.SG
I2633	PB768	21.2065	21.2065	1	21.2065	1	21.2065	1	21.2065	1	5639	Scotland_N.AG	5475	Ireland_MN.SG
I2633	PN05	8.8218	8.8218	1	0	0	0	0	0	0	5639	Scotland_N.AG	5729	Ireland_EN.SG
I2633	PN07	8.0941	8.0941	1	0	0	0	0	0	0	5639	Scotland_N.AG	5410	Ireland_MN.SG
I2633	611	12.3385	31.6443	3	12.3385	1	0	0	0	0	5639	Scotland_N.AG	5418	England_Trumpington_N.SG
I2633	613	8.3167	8.3167	1	0	0	0	0	0	0	5639	Scotland_N.AG	5639	England_Trumpington_N_brother.TRPTN_611.SG
I2633	RISE1162	8.53491	8.53491	1	0	0	0	0	0	0	5639	Scotland_N.AG	4765	Poland_Koszyce_GlobularAmphora_daughter.RISE1170.sister.RISE1164.SG
I2633	RISE1163	8.53211	8.53211	1	0	0	0	0	0	0	5639	Scotland_N.AG	4736	Poland_Koszyce_GlobularAmphora.SG
I2633	RISE1164	8.5984	8.5984	1	0	0	0	0	0	0	5639	Scotland_N.AG	4463	Poland_Koszyce_GlobularAmphora_son.RISE1170.brother.RISE1164.SG
I2633	RISE1167	8.53211	8.53211	1	0	0	0	0	0	0	5639	Scotland_N.AG	4721	Poland_Koszyce_GlobularAmphora_daughter.RISE1166.sister.RISE1171.SG
I2633	RISE1169	8.53089	8.53089	1	0	0	0	0	0	0	5639	Scotland_N.AG	4747	Poland_Koszyce_GlobularAmphora_brother.RISE1168.brother.RISE1173.brother.RISE1163.SG
I2633	RISE1173	8.53211	8.53211	1	0	0	0	0	0	0	5639	Scotland_N.AG	4635	Poland_Koszyce_GlobularAmphora_brother.RISE1169.brother.RISE1168.brother.RISE1163.SG
I2633	2H10	9.7008	17.8738	2	0	0	0	0	0	0	5639	Scotland_N.AG	5165	France_MontAime_MLN.SG
I2633	I13892	8.1393	8.1393	1	0	0	0	0	0	0	5639	Scotland_N.AG	5677	England_N_Megalithic.AG
I2633	I30300	8.4709	8.4709	1	0	0	0	0	0	0	5639	Scotland_N.AG	5575	England_N_Megalithic.TW
I2633	I13893	14.0989	14.0989	1	14.0989	1	0	0	0	0	5639	Scotland_N.AG	5517	England_N_Megalithic.AG
I2633	I13896	17.697	35.6681	3	17.697	1	17.697	1	0	0	5639	Scotland_N.AG	5486	England_N_Megalithic_sister.I21395.daughter.I30332.AG
I2633	I20818	9.8003	9.8003	1	0	0	0	0	0	0	5639	Scotland_N.AG	5545	England_N_Megalithic.TW
I2633	I30293	8.3434	8.3434	1	0	0	0	0	0	0	5639	Scotland_N.AG	5575	England_N_Megalithic.TW
I2633	I30299	8.46372	8.46372	1	0	0	0	0	0	0	5639	Scotland_N.AG	5535	England_N_Megalithic_son.I30300.son.I30302.brother.I12440.TW
I2633	I30334	15.4651	41.4742	3	41.4742	3	0	0	0	0	5639	Scotland_N.AG	5575	England_N_Megalithic.TW
I2633	I13897	13.9627	22.1891	2	13.9627	1	0	0	0	0	5639	Scotland_N.AG	5600	England_N_Megalithic_lc.TW
I2633	I13898	12.6786	25.1573	2	25.1573	2	0	0	0	0	5639	Scotland_N.AG	5569	England_N_Megalithic_son.I30334.TW
I2633	I12437	12.5156	33.4957	3	24.9246	2	0	0	0	0	5639	Scotland_N.AG	5600	England_N_Megalithic_father.I13888.father.I21393.father.I21389.father.I30304.son.I30334.son.I30300.AG
I2633	I21385	8.5949	16.9758	2	0	0	0	0	0	0	5639	Scotland_N.AG	5680	England_N_Megalithic.TW
I2633	I21389	12.4482	12.4482	1	12.4482	1	0	0	0	0	5639	Scotland_N.AG	5585	England_N_Megalithic.TW
I2633	I21393	12.7591	12.7591	1	12.7591	1	0	0	0	0	5639	Scotland_N.AG	5600	England_N_Megalithic.TW
I2633	NEO624	9.6277	18.0323	2	0	0	0	0	0	0	5639	Scotland_N.AG	4903	Great_Britain_Orkney_N.SG
I2633	NEO625	12.0244	12.0244	1	12.0244	1	0	0	0	0	5639	Scotland_N.AG	5138	Great_Britain_Orkney_N_father.NEO624.SG
I2633	FRA025	9.0483	9.0483	1	0	0	0	0	0	0	5639	Scotland_N.AG	4959	Sweden_Fralsegarden_N.SG
I2633	HJE013	8.16101	8.16101	1	0	0	0	0	0	0	5639	Scotland_N.AG	5075	Sweden_HjelmarsRor_N.SG
I2633	LAN004	11.9356	11.9356	1	0	0	0	0	0	0	5639	Scotland_N.AG	4977	Sweden_Landbogarden_N.SG
I2633	LAN007	11.604	11.604	1	0	0	0	0	0	0	5639	Scotland_N.AG	4950	Sweden_Landbogarden_N.SG
I2633	KH150626	16.9195	16.9195	1	16.9195	1	16.9195	1	0	0	5639	Scotland_N.AG	5250	Germany_Niedertiefenbach
I2633	KH180152	9.1409	9.1409	1	0	0	0	0	0	0	5639	Scotland_N.AG	5136	Germany_Altendorf
I2633	KH180153_KH180154	9.6539	9.6539	1	0	0	0	0	0	0	5639	Scotland_N.AG	5124	Germany_Altendorf
I2633	KH210846	8.1338	8.1338	1	0	0	0	0	0	0	5639	Scotland_N.AG	5225	Germany_Sorsum
I2633	KH210849_KH220441	8.97399	8.97399	1	0	0	0	0	0	0	5639	Scotland_N.AG	5225	Germany_Sorsum
I2633	KH210852	8.97059	8.97059	1	0	0	0	0	0	0	5639	Scotland_N.AG	5225	Germany_Sorsum
I2633	KH210853	8.0035	8.0035	1	0	0	0	0	0	0	5639	Scotland_N.AG	5225	Germany_Sorsum
I2633	KH210856	9.41581	17.6634	2	0	0	0	0	0	0	5639	Scotland_N.AG	5225	Germany_Sorsum
I2633	KH210914	9.258	9.258	1	0	0	0	0	0	0	5639	Scotland_N.AG	5225	Germany_Sorsum
I2633	KH210928_KH210942	9.3398	9.3398	1	0	0	0	0	0	0	5639	Scotland_N.AG	5225	Germany_Sorsum
I2633	KH210931	10.4613	10.4613	1	0	0	0	0	0	0	5639	Scotland_N.AG	5225	Germany_Sorsum
I2633	KH200229	8.2837	8.2837	1	0	0	0	0	0	0	5639	Scotland_N.AG	5150	Germany_Warburg
I2633	KH201256	9.6539	9.6539	1	0	0	0	0	0	0	5639	Scotland_N.AG	5150	Germany_Warburg
I2635	I2637	24.3709	68.7712	4	59.7929	3	59.7929	3	24.3709	1	5523	Scotland_N.AG	5375	Scotland_N.AG
I2635	I2650	29.4173	156.934	11	110.127	6	68.6169	3	50.7603	2	5523	Scotland_N.AG	5375	Scotland_N.AG
I2635	I2651	11.1956	30.4793	3	0	0	0	0	0	0	5523	Scotland_N.AG	5160	Scotland_N.AG
I2635	I2660	8.9527	16.9737	2	0	0	0	0	0	0	5523	Scotland_N.AG	5394	Scotland_N_mediumlowEEF.AG
I2635	I2691	17.8681	17.8681	1	17.8681	1	17.8681	1	0	0	5523	Scotland_N.AG	5613	Scotland_N_mediumlowEEF.AG
I2635	I2933	8.275	8.275	1	0	0	0	0	0	0	5523	Scotland_N.AG	4877	Scotland_N.AG
I2635	I2934	12.7575	50.7379	5	12.7575	1	0	0	0	0	5523	Scotland_N.AG	5138	Scotland_N.AG
I2635	I2935	12.9787	33.9583	3	12.9787	1	0	0	0	0	5523	Scotland_N.AG	5115	Scotland_N.AG
I2635	I2977	9.6736	9.6736	1	0	0	0	0	0	0	5523	Scotland_N.AG	4843	Scotland_N.AG
I2635	I2978	10.3597	27.3344	3	0	0	0	0	0	0	5523	Scotland_N.AG	5140	Scotland_N.AG
I2635	I2979	24.9097	88.597	6	70.6823	4	42.4866	2	24.9097	1	5523	Scotland_N.AG	5104	Scotland_N.AG
I2635	I2980	21.5417	73.0609	6	34.1446	2	21.5417	1	21.5417	1	5523	Scotland_N.AG	5173	Scotland_N.AG
I2635	I3041	8.1916	8.1916	1	0	0	0	0	0	0	5523	Scotland_N.AG	5440	Scotland_N_lowEEF.AG
I2635	I3068	9.7713	9.7713	1	0	0	0	0	0	0	5523	Scotland_N.AG	5533	England_N.AG
I2635	I3085	8.72719	17.3737	2	0	0	0	0	0	0	5523	Scotland_N.AG	5149	Scotland_N.AG
I2635	I5366	8.8787	17.6025	2	0	0	0	0	0	0	5523	Scotland_N.AG	5516	England_N.AG
I2635	I2636	75.9991	234.903	10	226.629	9	169.366	5	133.319	3	5523	Scotland_N.AG	5397	Scotland_N.AG
I2635	I4896	8.51309	8.51309	1	0	0	0	0	0	0	5523	Scotland_N.AG	4163	Czechia_BellBeaker.AG
I2635	I6746	10.3065	10.3065	1	0	0	0	0	0	0	5523	Scotland_N.AG	5526	England_N.AG
I2635	I6747	8.1927	8.1927	1	0	0	0	0	0	0	5523	Scotland_N.AG	5528	England_N.AG
I2635	I6753	8.219	8.219	1	0	0	0	0	0	0	5523	Scotland_N.AG	5305	England_N.AG
I2635	I6759	13.2646	23.868	2	13.2646	1	0	0	0	0	5523	Scotland_N.AG	5527	England_N.AG
I2635	I6761	10.379	19.0446	2	0	0	0	0	0	0	5523	Scotland_N.AG	5525	England_N.AG
I2635	I6766	8.4062	8.4062	1	0	0	0	0	0	0	5523	Scotland_N.AG	5100	Scotland_N.AG
I2635	I7554	11.2757	41.2497	4	0	0	0	0	0	0	5523	Scotland_N.AG	5182	Scotland_N.AG
I2635	HOL002	8.4106	8.4106	1	0	0	0	0	0	0	5523	Scotland_N.AG	5140	Czechia_N_Baden.AG
I2635	PRE001	8.564	8.564	1	0	0	0	0	0	0	5523	Scotland_N.AG	4625	Czechia_N_GlobularAmphora.AG
I2635	I6762	12.0773	23.2327	2	12.0773	1	0	0	0	0	5523	Scotland_N.AG	5700	England_N.AG
I2635	ASH3	14.4526	14.4526	1	14.4526	1	0	0	0	0	5523	Scotland_N.AG	5609	Ireland_EN_MN.SG
I2635	CAK68	8.5384	8.5384	1	0	0	0	0	0	0	5523	Scotland_N.AG	4503	Ireland_LN.SG
I2635	NGZ1	9.4462	9.4462	1	0	0	0	0	0	0	5523	Scotland_N.AG	5024	Ireland_MN.SG
I2635	PB1794	9.3833	9.3833	1	0	0	0	0	0	0	5523	Scotland_N.AG	5486	Ireland_MN.SG
I2635	PB186	8.6638	8.6638	1	0	0	0	0	0	0	5523	Scotland_N.AG	5393	Ireland_MN.SG
I2635	PB443	11.0843	11.0843	1	0	0	0	0	0	0	5523	Scotland_N.AG	5474	Ireland_MN.SG
I2635	PB672	13.7462	13.7462	1	13.7462	1	0	0	0	0	5523	Scotland_N.AG	5442	Ireland_MN.SG
I2635	PN04	14.4677	14.4677	1	14.4677	1	0	0	0	0	5523	Scotland_N.AG	5742	Ireland_EN.SG
I2635	PN05	10.1808	10.1808	1	0	0	0	0	0	0	5523	Scotland_N.AG	5729	Ireland_EN.SG
I2635	PN06	20.3926	20.3926	1	20.3926	1	20.3926	1	20.3926	1	5523	Scotland_N.AG	5459	Ireland_MN.SG
I2635	PN10_PN113	8.2571	8.2571	1	0	0	0	0	0	0	5523	Scotland_N.AG	5746	Ireland_EN.SG
I2635	bal004	24.7188	59.447	4	38.953	2	24.7188	1	24.7188	1	5523	Scotland_N.AG	5186	Scotland_Megalithic.SG
I2635	prs016	11.7182	11.7182	1	0	0	0	0	0	0	5523	Scotland_N.AG	5539	Ireland_Megalithic.SG
I2635	611	9.8509	9.8509	1	0	0	0	0	0	0	5523	Scotland_N.AG	5418	England_Trumpington_N.SG
I2635	613	8.6798	8.6798	1	0	0	0	0	0	0	5523	Scotland_N.AG	5639	England_Trumpington_N_brother.TRPTN_611.SG
I2635	RISE1159	9.01771	17.5476	2	0	0	0	0	0	0	5523	Scotland_N.AG	4724	Poland_Koszyce_GlobularAmphora.SG
I2635	RISE1160	8.52561	8.52561	1	0	0	0	0	0	0	5523	Scotland_N.AG	4721	Poland_Koszyce_GlobularAmphora_son.RISE1159.son.RISE1168.SG
I2635	I13892	10.4798	19.3113	2	0	0	0	0	0	0	5523	Scotland_N.AG	5677	England_N_Megalithic.AG
I2635	I14171	9.9781	9.9781	1	0	0	0	0	0	0	5523	Scotland_N.AG	5850	Czechia_C_Baalberge.AG
I2635	I21390	11.3255	11.3255	1	0	0	0	0	0	0	5523	Scotland_N.AG	5630	England_N_Megalithic.AG
I2635	I12439	13.2625	13.2625	1	13.2625	1	0	0	0	0	5523	Scotland_N.AG	5600	England_N_Megalithic.AG
I2635	I13896	15.3222	15.3222	1	15.3222	1	0	0	0	0	5523	Scotland_N.AG	5486	England_N_Megalithic_sister.I21395.daughter.I30332.AG
I2635	I20818	8.27719	8.27719	1	0	0	0	0	0	0	5523	Scotland_N.AG	5545	England_N_Megalithic.TW
I2635	I13890	10.0733	10.0733	1	0	0	0	0	0	0	5523	Scotland_N.AG	5600	England_N_Megalithic.TW
I2635	I13899	8.31718	8.31718	1	0	0	0	0	0	0	5523	Scotland_N.AG	5600	England_N_Megalithic.TW
I2635	I20821	11.3435	21.4075	2	0	0	0	0	0	0	5523	Scotland_N.AG	5486	England_N_Megalithic.TW
I2635	I13895	11.3149	20.0028	2	0	0	0	0	0	0	5523	Scotland_N.AG	5600	England_N_Megalithic_father.I20821.son.I21390.TW
I2635	I21385	8.3118	8.3118	1	0	0	0	0	0	0	5523	Scotland_N.AG	5680	England_N_Megalithic.TW
I2635	I21389	11.4588	11.4588	1	0	0	0	0	0	0	5523	Scotland_N.AG	5585	England_N_Megalithic.TW
I2635	NEO624	24.8376	37.9486	2	37.9486	2	24.8376	1	24.8376	1	5523	Scotland_N.AG	4903	Great_Britain_Orkney_N.SG
I2635	NEO625	18.9314	60.5176	5	43.8714	3	18.9314	1	0	0	5523	Scotland_N.AG	5138	Great_Britain_Orkney_N_father.NEO624.SG
I2635	NEO847	9.78589	9.78589	1	0	0	0	0	0	0	5523	Scotland_N.AG	5416	Great_Britain_Gloucestershire_N.SG
I2635	KH150619	9.0023	9.0023	1	0	0	0	0	0	0	5523	Scotland_N.AG	5250	Germany_Niedertiefenbach
I2635	KH150639	11.5669	11.5669	1	0	0	0	0	0	0	5523	Scotland_N.AG	5250	Germany_Niedertiefenbach
I2635	KH180120	9.0298	9.0298	1	0	0	0	0	0	0	5523	Scotland_N.AG	5150	Germany_Warburg
I2637	I2651	19.7206	34.0115	2	34.0115	2	19.7206	1	0	0	5375	Scotland_N.AG	5160	Scotland_N.AG
I2637	I2660	11.1019	19.3504	2	0	0	0	0	0	0	5375	Scotland_N.AG	5394	Scotland_N_mediumlowEEF.AG
I2637	I2691	12.5983	12.5983	1	12.5983	1	0	0	0	0	5375	Scotland_N.AG	5613	Scotland_N_mediumlowEEF.AG
I2637	I2933	9.60571	9.60571	1	0	0	0	0	0	0	5375	Scotland_N.AG	4877	Scotland_N.AG
I2637	I2934	12.5892	28.9341	3	12.5892	1	0	0	0	0	5375	Scotland_N.AG	5138	Scotland_N.AG
I2637	I2935	18.4204	18.4204	1	18.4204	1	18.4204	1	0	0	5375	Scotland_N.AG	5115	Scotland_N.AG
I2637	I2978	11.2225	21.2726	2	0	0	0	0	0	0	5375	Scotland_N.AG	5140	Scotland_N.AG
I2637	I2979	12.8869	21.1376	2	12.8869	1	0	0	0	0	5375	Scotland_N.AG	5104	Scotland_N.AG
I2637	I2980	8.983	17.4361	2	0	0	0	0	0	0	5375	Scotland_N.AG	5173	Scotland_N.AG
I2637	I2988	8.3936	8.3936	1	0	0	0	0	0	0	5375	Scotland_N.AG	5398	Scotland_N.AG
I2637	I3041	10.0665	10.0665	1	0	0	0	0	0	0	5375	Scotland_N.AG	5440	Scotland_N_lowEEF.AG
I2637	I3068	10.2562	19.5938	2	0	0	0	0	0	0	5375	Scotland_N.AG	5533	England_N.AG
I2637	I3085	11.9998	59.6644	6	0	0	0	0	0	0	5375	Scotland_N.AG	5149	Scotland_N.AG
I2637	I3136	11.0866	11.0866	1	0	0	0	0	0	0	5375	Scotland_N.AG	5397	Scotland_N.AG
I2637	I3138	10.5775	10.5775	1	0	0	0	0	0	0	5375	Scotland_N.AG	4998	Scotland_N.AG
I2637	I5366	8.04069	8.04069	1	0	0	0	0	0	0	5375	Scotland_N.AG	5516	England_N.AG
I2637	I2636	37.1099	138.655	7	106.348	4	90.7753	3	90.7753	3	5375	Scotland_N.AG	5397	Scotland_N.AG
I2637	I6746	9.7947	9.7947	1	0	0	0	0	0	0	5375	Scotland_N.AG	5526	England_N.AG
I2637	I6747	9.992	9.992	1	0	0	0	0	0	0	5375	Scotland_N.AG	5528	England_N.AG
I2637	I6759	9.4563	18.2224	2	0	0	0	0	0	0	5375	Scotland_N.AG	5527	England_N.AG
I2637	I6760	8.8053	8.8053	1	0	0	0	0	0	0	5375	Scotland_N.AG	5781	England_N.AG
I2637	I7554	38.9679	47.0696	2	38.9679	1	38.9679	1	38.9679	1	5375	Scotland_N.AG	5182	Scotland_N.AG
I2637	ANN1	11.4721	11.4721	1	0	0	0	0	0	0	5375	Scotland_N.AG	5405	Ireland_MN.SG
I2637	ASH3	10.3237	10.3237	1	0	0	0	0	0	0	5375	Scotland_N.AG	5609	Ireland_EN_MN.SG
I2637	CAK530	9.5358	9.5358	1	0	0	0	0	0	0	5375	Scotland_N.AG	4711	Ireland_LN.SG
I2637	CAK533	8.27	8.27	1	0	0	0	0	0	0	5375	Scotland_N.AG	4926	Ireland_LN.SG
I2637	GNM1007	8.50689	8.50689	1	0	0	0	0	0	0	5375	Scotland_N.AG	5288	Ireland_MN.SG
I2637	GNM1076	11.2318	11.2318	1	0	0	0	0	0	0	5375	Scotland_N.AG	5135	Ireland_MN.SG
I2637	NG10	8.44651	8.44651	1	0	0	0	0	0	0	5375	Scotland_N.AG	5151	Ireland_MN.SG
I2637	PB443	11.507	29.9338	3	0	0	0	0	0	0	5375	Scotland_N.AG	5474	Ireland_MN.SG
I2637	PN03	9.8986	9.8986	1	0	0	0	0	0	0	5375	Scotland_N.AG	5460	Ireland_MN.SG
I2637	PN06	19.008	19.008	1	19.008	1	19.008	1	0	0	5375	Scotland_N.AG	5459	Ireland_MN.SG
I2637	PN12	9.3334	9.3334	1	0	0	0	0	0	0	5375	Scotland_N.AG	5383	Ireland_MN.SG
I2637	bal004	18.5359	37.1696	3	18.5359	1	18.5359	1	0	0	5375	Scotland_N.AG	5186	Scotland_Megalithic.SG
I2637	611	15.2571	26.5348	2	15.2571	1	0	0	0	0	5375	Scotland_N.AG	5418	England_Trumpington_N.SG
I2637	613	15.2425	15.2425	1	15.2425	1	0	0	0	0	5375	Scotland_N.AG	5639	England_Trumpington_N_brother.TRPTN_611.SG
I2637	I13889	11.2213	11.2213	1	0	0	0	0	0	0	5375	Scotland_N.AG	5624	England_N_Megalithic.AG
I2637	I13892	8.64379	8.64379	1	0	0	0	0	0	0	5375	Scotland_N.AG	5677	England_N_Megalithic.AG
I2637	I30300	14.1916	32.5451	3	14.1916	1	0	0	0	0	5375	Scotland_N.AG	5575	England_N_Megalithic.TW
I2637	I13893	9.3734	9.3734	1	0	0	0	0	0	0	5375	Scotland_N.AG	5517	England_N_Megalithic.AG
I2637	I30299	12.0945	22.9024	2	12.0945	1	0	0	0	0	5375	Scotland_N.AG	5535	England_N_Megalithic_son.I30300.son.I30302.brother.I12440.TW
I2637	I30334	13.9156	22.859	2	13.9156	1	0	0	0	0	5375	Scotland_N.AG	5575	England_N_Megalithic.TW
I2637	I13897	14.6823	14.6823	1	14.6823	1	0	0	0	0	5375	Scotland_N.AG	5600	England_N_Megalithic_lc.TW
I2637	I13898	12.5211	12.5211	1	12.5211	1	0	0	0	0	5375	Scotland_N.AG	5569	England_N_Megalithic_son.I30334.TW
I2637	I13899	9.8421	9.8421	1	0	0	0	0	0	0	5375	Scotland_N.AG	5600	England_N_Megalithic.TW
I2637	I12437	14.505	25.654	2	14.505	1	0	0	0	0	5375	Scotland_N.AG	5600	England_N_Megalithic_father.I13888.father.I21393.father.I21389.father.I30304.son.I30334.son.I30300.AG
I2637	I21388	9.9739	9.9739	1	0	0	0	0	0	0	5375	Scotland_N.AG	5657	England_N_Megalithic_son.I30300.son.I21390.TW
I2637	I21393	12.8151	12.8151	1	12.8151	1	0	0	0	0	5375	Scotland_N.AG	5600	England_N_Megalithic.TW
I2637	NEO624	10.9612	10.9612	1	0	0	0	0	0	0	5375	Scotland_N.AG	4903	Great_Britain_Orkney_N.SG
I2637	NEO625	17.6849	41.3645	3	30.4967	2	17.6849	1	0	0	5375	Scotland_N.AG	5138	Great_Britain_Orkney_N_father.NEO624.SG
I2637	NEO935	10.1896	10.1896	1	0	0	0	0	0	0	5375	Scotland_N.AG	5204	Denmark_SouthScandinavia_EN.SG
I2637	HUN002	9.491	9.491	1	0	0	0	0	0	0	5375	Scotland_N.AG	5218	Sweden_Hunnebostrand_N.SG
I2637	LAN008	9.4904	9.4904	1	0	0	0	0	0	0	5375	Scotland_N.AG	4950	Sweden_Landbogarden_N.SG
I2637	KH150625	9.123	9.123	1	0	0	0	0	0	0	5375	Scotland_N.AG	5250	Germany_Niedertiefenbach
I2637	KH150635	8.1208	8.1208	1	0	0	0	0	0	0	5375	Scotland_N.AG	5250	Germany_Niedertiefenbach
I2637	KH210846	9.4704	9.4704	1	0	0	0	0	0	0	5375	Scotland_N.AG	5225	Germany_Sorsum
I2637	KH200229	8.0817	8.0817	1	0	0	0	0	0	0	5375	Scotland_N.AG	5150	Germany_Warburg
I2650	I2651	15.3908	46.8139	4	27.7248	2	0	0	0	0	5375	Scotland_N.AG	5160	Scotland_N.AG
I2650	I2660	10.8492	10.8492	1	0	0	0	0	0	0	5375	Scotland_N.AG	5394	Scotland_N_mediumlowEEF.AG
I2650	I2691	15.9892	25.6814	2	15.9892	1	0	0	0	0	5375	Scotland_N.AG	5613	Scotland_N_mediumlowEEF.AG
I2650	I2933	10.302	10.302	1	0	0	0	0	0	0	5375	Scotland_N.AG	4877	Scotland_N.AG
I2650	I2934	10.1421	10.1421	1	0	0	0	0	0	0	5375	Scotland_N.AG	5138	Scotland_N.AG
I2650	I2935	10.081	18.7489	2	0	0	0	0	0	0	5375	Scotland_N.AG	5115	Scotland_N.AG
I2650	I2977	9.2208	18.0604	2	0	0	0	0	0	0	5375	Scotland_N.AG	4843	Scotland_N.AG
I2650	I2978	18.4862	83.2631	7	32.3756	2	18.4862	1	0	0	5375	Scotland_N.AG	5140	Scotland_N.AG
I2650	I2979	19.1911	85.2013	6	64.5376	4	37.1107	2	0	0	5375	Scotland_N.AG	5104	Scotland_N.AG
I2650	I2980	15.2332	28.4918	2	28.4918	2	0	0	0	0	5375	Scotland_N.AG	5173	Scotland_N.AG
I2650	I3068	11.7455	20.1697	2	0	0	0	0	0	0	5375	Scotland_N.AG	5533	England_N.AG
I2650	I3085	9.7155	26.9565	3	0	0	0	0	0	0	5375	Scotland_N.AG	5149	Scotland_N.AG
I2650	I3133	15.9295	35.3543	3	15.9295	1	0	0	0	0	5375	Scotland_N.AG	5446	Scotland_N.AG
I2650	I3135	14.4613	26.3937	2	14.4613	1	0	0	0	0	5375	Scotland_N.AG	5517	Scotland_N_lowEEF.AG
I2650	I3136	10.3913	19.2425	2	0	0	0	0	0	0	5375	Scotland_N.AG	5397	Scotland_N.AG
I2650	I3138	9.1589	9.1589	1	0	0	0	0	0	0	5375	Scotland_N.AG	4998	Scotland_N.AG
I2650	I2636	26.1952	78.6246	6	38.976	2	26.1952	1	26.1952	1	5375	Scotland_N.AG	5397	Scotland_N.AG
I2650	I6746	8.04781	8.04781	1	0	0	0	0	0	0	5375	Scotland_N.AG	5526	England_N.AG
I2650	I6747	10.2965	10.2965	1	0	0	0	0	0	0	5375	Scotland_N.AG	5528	England_N.AG
I2650	I6751	10.7499	10.7499	1	0	0	0	0	0	0	5375	Scotland_N.AG	5650	England_N.AG
I2650	I6753	14.1393	14.1393	1	14.1393	1	0	0	0	0	5375	Scotland_N.AG	5305	England_N.AG
I2650	I6759	10.8937	21.2117	2	0	0	0	0	0	0	5375	Scotland_N.AG	5527	England_N.AG
I2650	I6761	13.8994	13.8994	1	13.8994	1	0	0	0	0	5375	Scotland_N.AG	5525	England_N.AG
I2650	I6766	8.5099	16.9766	2	0	0	0	0	0	0	5375	Scotland_N.AG	5100	Scotland_N.AG
I2650	I7208	15.9898	15.9898	1	15.9898	1	0	0	0	0	5375	Scotland_N.AG	4324	Czechia_EBA_CordedWare.AG
I2650	I7554	8.0052	8.0052	1	0	0	0	0	0	0	5375	Scotland_N.AG	5182	Scotland_N.AG
I2650	I6762	11.1077	11.1077	1	0	0	0	0	0	0	5375	Scotland_N.AG	5700	England_N.AG
I2650	PSS4693	9.30851	9.30851	1	0	0	0	0	0	0	5375	Scotland_N.AG	5396	France_GrandEst_MN.SG
I2650	CAK532	9.76419	9.76419	1	0	0	0	0	0	0	5375	Scotland_N.AG	4892	Ireland_LN.SG
I2650	MB6	9.3449	9.3449	1	0	0	0	0	0	0	5375	Scotland_N.AG	5192	Ireland_MN.SG
I2650	PB1327	12.676	21.3284	2	12.676	1	0	0	0	0	5375	Scotland_N.AG	5407	Ireland_MN.SG
I2650	PB186	8.5794	8.5794	1	0	0	0	0	0	0	5375	Scotland_N.AG	5393	Ireland_MN.SG
I2650	PB581	8.8385	8.8385	1	0	0	0	0	0	0	5375	Scotland_N.AG	5413	Ireland_MN.SG
I2650	PB768	8.3492	8.3492	1	0	0	0	0	0	0	5375	Scotland_N.AG	5475	Ireland_MN.SG
I2650	PN107	8.8632	8.8632	1	0	0	0	0	0	0	5375	Scotland_N.AG	5705	Ireland_EN.SG
I2650	bal004	9.8264	18.1724	2	0	0	0	0	0	0	5375	Scotland_N.AG	5186	Scotland_Megalithic.SG
I2650	I13889	11.6785	11.6785	1	0	0	0	0	0	0	5375	Scotland_N.AG	5624	England_N_Megalithic.AG
I2650	I13892	14.4842	24.0809	2	14.4842	1	0	0	0	0	5375	Scotland_N.AG	5677	England_N_Megalithic.AG
I2650	I14174	8.0498	8.0498	1	0	0	0	0	0	0	5375	Scotland_N.AG	5850	Czechia_C_Baalberge.AG
I2650	I21390	10.0459	28.5864	3	0	0	0	0	0	0	5375	Scotland_N.AG	5630	England_N_Megalithic.AG
I2650	I30300	8.7804	8.7804	1	0	0	0	0	0	0	5375	Scotland_N.AG	5575	England_N_Megalithic.TW
I2650	I12439	8.97681	8.97681	1	0	0	0	0	0	0	5375	Scotland_N.AG	5600	England_N_Megalithic.AG
I2650	I13893	8.9762	8.9762	1	0	0	0	0	0	0	5375	Scotland_N.AG	5517	England_N_Megalithic.AG
I2650	I13896	8.4306	8.4306	1	0	0	0	0	0	0	5375	Scotland_N.AG	5486	England_N_Megalithic_sister.I21395.daughter.I30332.AG
I2650	I30299	9.2071	9.2071	1	0	0	0	0	0	0	5375	Scotland_N.AG	5535	England_N_Megalithic_son.I30300.son.I30302.brother.I12440.TW
I2650	I30301	8.0422	8.0422	1	0	0	0	0	0	0	5375	Scotland_N.AG	5575	England_N_Megalithic.TW
I2650	I30334	8.3638	8.3638	1	0	0	0	0	0	0	5375	Scotland_N.AG	5575	England_N_Megalithic.TW
I2650	I13890	10.5814	10.5814	1	0	0	0	0	0	0	5375	Scotland_N.AG	5600	England_N_Megalithic.TW
I2650	I13899	8.2488	8.2488	1	0	0	0	0	0	0	5375	Scotland_N.AG	5600	England_N_Megalithic.TW
I2650	I13895	10.4152	10.4152	1	0	0	0	0	0	0	5375	Scotland_N.AG	5600	England_N_Megalithic_father.I20821.son.I21390.TW
I2650	I21388	10.0685	18.8301	2	0	0	0	0	0	0	5375	Scotland_N.AG	5657	England_N_Megalithic_son.I30300.son.I21390.TW
I2650	NEO624	15.6802	49.2553	5	15.6802	1	0	0	0	0	5375	Scotland_N.AG	4903	Great_Britain_Orkney_N.SG
I2650	NEO625	19.1254	61.2149	5	32.4841	2	19.1254	1	0	0	5375	Scotland_N.AG	5138	Great_Britain_Orkney_N_father.NEO624.SG
I2650	NEO847	14.2161	14.2161	1	14.2161	1	0	0	0	0	5375	Scotland_N.AG	5416	Great_Britain_Gloucestershire_N.SG
I2650	KH180152	8.581	8.581	1	0	0	0	0	0	0	5375	Scotland_N.AG	5136	Germany_Altendorf
I2651	I2659	8.5284	8.5284	1	0	0	0	0	0	0	5160	Scotland_N.AG	5637	Scotland_N.AG
I2651	I2691	8.475	8.475	1	0	0	0	0	0	0	5160	Scotland_N.AG	5613	Scotland_N_mediumlowEEF.AG
I2651	I2933	17.0509	17.0509	1	17.0509	1	17.0509	1	0	0	5160	Scotland_N.AG	4877	Scotland_N.AG
I2651	I2934	22.4879	55.0885	3	55.0885	3	42.9568	2	42.9568	2	5160	Scotland_N.AG	5138	Scotland_N.AG
I2651	I2935	9.3092	9.3092	1	0	0	0	0	0	0	5160	Scotland_N.AG	5115	Scotland_N.AG
I2651	I2977	20.8865	31.2082	2	20.8865	1	20.8865	1	20.8865	1	5160	Scotland_N.AG	4843	Scotland_N.AG
I2651	I2978	29.4038	92.4366	7	29.4038	1	29.4038	1	29.4038	1	5160	Scotland_N.AG	5140	Scotland_N.AG
I2651	I2979	16.3019	37.2809	3	28.379	2	16.3019	1	0	0	5160	Scotland_N.AG	5104	Scotland_N.AG
I2651	I2980	24.3647	53.3391	3	53.3391	3	40.4278	2	24.3647	1	5160	Scotland_N.AG	5173	Scotland_N.AG
I2651	I2988	8.3127	8.3127	1	0	0	0	0	0	0	5160	Scotland_N.AG	5398	Scotland_N.AG
I2651	I3068	10.6219	10.6219	1	0	0	0	0	0	0	5160	Scotland_N.AG	5533	England_N.AG
I2651	I3085	9.6634	28.002	3	0	0	0	0	0	0	5160	Scotland_N.AG	5149	Scotland_N.AG
I2651	I3136	11.6653	11.6653	1	0	0	0	0	0	0	5160	Scotland_N.AG	5397	Scotland_N.AG
I2651	I3138	9.5065	9.5065	1	0	0	0	0	0	0	5160	Scotland_N.AG	4998	Scotland_N.AG
I2651	I3601	8.2778	8.2778	1	0	0	0	0	0	0	5160	Scotland_N.AG	4175	Germany_BellBeaker.AG
I2651	I2636	34.8424	120.322	7	92.017	4	79.6114	3	61.8736	2	5160	Scotland_N.AG	5397	Scotland_N.AG
I2651	I6746	8.0983	8.0983	1	0	0	0	0	0	0	5160	Scotland_N.AG	5526	England_N.AG
I2651	I6747	8.6818	8.6818	1	0	0	0	0	0	0	5160	Scotland_N.AG	5528	England_N.AG
I2651	I6759	8.60279	8.60279	1	0	0	0	0	0	0	5160	Scotland_N.AG	5527	England_N.AG
I2651	I7554	17.5911	64.6916	5	46.0826	3	17.5911	1	0	0	5160	Scotland_N.AG	5182	Scotland_N.AG
I2651	BLS002	8.2085	8.2085	1	0	0	0	0	0	0	5160	Scotland_N.AG	4692	Czechia_N_GlobularAmphora.AG
I2651	ANN1	10.3258	19.4902	2	0	0	0	0	0	0	5160	Scotland_N.AG	5405	Ireland_MN.SG
I2651	ASH3	8.51541	8.51541	1	0	0	0	0	0	0	5160	Scotland_N.AG	5609	Ireland_EN_MN.SG
I2651	BG72	8.2851	8.2851	1	0	0	0	0	0	0	5160	Scotland_N.AG	5467	Ireland_MN.SG
I2651	GNM1007	12.3766	12.3766	1	12.3766	1	0	0	0	0	5160	Scotland_N.AG	5288	Ireland_MN.SG
I2651	GNM1076	12.6726	12.6726	1	12.6726	1	0	0	0	0	5160	Scotland_N.AG	5135	Ireland_MN.SG
I2651	PB186	9.14501	9.14501	1	0	0	0	0	0	0	5160	Scotland_N.AG	5393	Ireland_MN.SG
I2651	PB443	11.4875	11.4875	1	0	0	0	0	0	0	5160	Scotland_N.AG	5474	Ireland_MN.SG
I2651	PB672	8.1668	8.1668	1	0	0	0	0	0	0	5160	Scotland_N.AG	5442	Ireland_MN.SG
I2651	PB768	9.9113	18.0725	2	0	0	0	0	0	0	5160	Scotland_N.AG	5475	Ireland_MN.SG
I2651	PN02	8.0579	8.0579	1	0	0	0	0	0	0	5160	Scotland_N.AG	5546	Ireland_EN_MN.SG
I2651	PN03	10.5455	10.5455	1	0	0	0	0	0	0	5160	Scotland_N.AG	5460	Ireland_MN.SG
I2651	PN07	10.7487	10.7487	1	0	0	0	0	0	0	5160	Scotland_N.AG	5410	Ireland_MN.SG
I2651	PN10_PN113	9.2691	9.2691	1	0	0	0	0	0	0	5160	Scotland_N.AG	5746	Ireland_EN.SG
I2651	PN13	8.5243	8.5243	1	0	0	0	0	0	0	5160	Scotland_N.AG	5572	Ireland_EN_MN.SG
I2651	bal004	11.7497	20.0532	2	0	0	0	0	0	0	5160	Scotland_N.AG	5186	Scotland_Megalithic.SG
I2651	611	8.6145	8.6145	1	0	0	0	0	0	0	5160	Scotland_N.AG	5418	England_Trumpington_N.SG
I2651	613	8.6434	8.6434	1	0	0	0	0	0	0	5160	Scotland_N.AG	5639	England_Trumpington_N_brother.TRPTN_611.SG
I2651	I13889	9.499	9.499	1	0	0	0	0	0	0	5160	Scotland_N.AG	5624	England_N_Megalithic.AG
I2651	I13892	9.0005	9.0005	1	0	0	0	0	0	0	5160	Scotland_N.AG	5677	England_N_Megalithic.AG
I2651	I13893	10.7458	20.1015	2	0	0	0	0	0	0	5160	Scotland_N.AG	5517	England_N_Megalithic.AG
I2651	I13896	21.8611	39.7261	3	21.8611	1	21.8611	1	21.8611	1	5160	Scotland_N.AG	5486	England_N_Megalithic_sister.I21395.daughter.I30332.AG
I2651	I20818	9.699	26.5946	3	0	0	0	0	0	0	5160	Scotland_N.AG	5545	England_N_Megalithic.TW
I2651	I13899	10.2491	10.2491	1	0	0	0	0	0	0	5160	Scotland_N.AG	5600	England_N_Megalithic.TW
I2651	I21385	9.503	9.503	1	0	0	0	0	0	0	5160	Scotland_N.AG	5680	England_N_Megalithic.TW
I2651	NEO624	26.4705	36.202	2	26.4705	1	26.4705	1	26.4705	1	5160	Scotland_N.AG	4903	Great_Britain_Orkney_N.SG
I2651	NEO625	27.0636	35.5376	2	27.0636	1	27.0636	1	27.0636	1	5160	Scotland_N.AG	5138	Great_Britain_Orkney_N_father.NEO624.SG
I2651	NEO28	9.0385	9.0385	1	0	0	0	0	0	0	5160	Scotland_N.AG	5485	Denmark_SouthScandinavia_EN.SG
I2651	FRA107	8.9303	8.9303	1	0	0	0	0	0	0	5160	Scotland_N.AG	5000	Sweden_Fralsegarden_N.SG
I2651	HJE006	8.2414	8.2414	1	0	0	0	0	0	0	5160	Scotland_N.AG	5075	Sweden_HjelmarsRor_N.SG
I2651	KH210853	10.2544	10.2544	1	0	0	0	0	0	0	5160	Scotland_N.AG	5225	Germany_Sorsum
I2651	KH210856	8.2653	8.2653	1	0	0	0	0	0	0	5160	Scotland_N.AG	5225	Germany_Sorsum
I2651	KH210902	8.25	8.25	1	0	0	0	0	0	0	5160	Scotland_N.AG	5225	Germany_Sorsum
I2651	KH210930_KH210945	9.1264	9.1264	1	0	0	0	0	0	0	5160	Scotland_N.AG	5225	Germany_Sorsum
I2659	I2660	8.043	8.043	1	0	0	0	0	0	0	5637	Scotland_N.AG	5394	Scotland_N_mediumlowEEF.AG
I2659	I2691	15.3276	25.9072	2	15.3276	1	0	0	0	0	5637	Scotland_N.AG	5613	Scotland_N_mediumlowEEF.AG
I2659	I2988	8.0526	8.0526	1	0	0	0	0	0	0	5637	Scotland_N.AG	5398	Scotland_N.AG
I2659	I3005	11.1546	11.1546	1	0	0	0	0	0	0	5637	Scotland_N.AG	5657	England_N.AG
I2659	I3041	42.6622	78.233	3	70.0955	2	70.0955	2	70.0955	2	5637	Scotland_N.AG	5440	Scotland_N_lowEEF.AG
I2659	I3068	10.396	10.396	1	0	0	0	0	0	0	5637	Scotland_N.AG	5533	England_N.AG
I2659	I3085	9.2498	9.2498	1	0	0	0	0	0	0	5637	Scotland_N.AG	5149	Scotland_N.AG
I2659	I3133	29.3572	40.1052	2	29.3572	1	29.3572	1	29.3572	1	5637	Scotland_N.AG	5446	Scotland_N.AG
I2659	I3134	21.5893	37.9037	2	37.9037	2	37.9037	2	21.5893	1	5637	Scotland_N.AG	5461	Scotland_N.AG
I2659	I3135	14.628	24.4467	2	14.628	1	0	0	0	0	5637	Scotland_N.AG	5517	Scotland_N_lowEEF.AG
I2659	I3136	30.6161	30.6161	1	30.6161	1	30.6161	1	30.6161	1	5637	Scotland_N.AG	5397	Scotland_N.AG
I2659	I3138	17.5795	47.6561	4	30.1602	2	17.5795	1	0	0	5637	Scotland_N.AG	4998	Scotland_N.AG
I2659	I5359	10.1286	10.1286	1	0	0	0	0	0	0	5637	Scotland_N.AG	5600	Wales_N.AG
I2659	I5366	8.67341	8.67341	1	0	0	0	0	0	0	5637	Scotland_N.AG	5516	England_N.AG
I2659	I6751	12.1697	20.8316	2	12.1697	1	0	0	0	0	5637	Scotland_N.AG	5650	England_N.AG
I2659	I6760	8.7111	8.7111	1	0	0	0	0	0	0	5637	Scotland_N.AG	5781	England_N.AG
I2659	I6762	11.6739	11.6739	1	0	0	0	0	0	0	5637	Scotland_N.AG	5700	England_N.AG
I2659	ARD2	10.3964	10.3964	1	0	0	0	0	0	0	5637	Scotland_N.AG	5401	Ireland_MN.SG
I2659	BG72	8.2678	8.2678	1	0	0	0	0	0	0	5637	Scotland_N.AG	5467	Ireland_MN.SG
I2659	CAK68	14.0352	14.0352	1	14.0352	1	0	0	0	0	5637	Scotland_N.AG	4503	Ireland_LN.SG
I2659	CH448	13.9407	22.3425	2	13.9407	1	0	0	0	0	5637	Scotland_N.AG	5517	Ireland_MN.SG
I2659	GNM1007	14.5034	36.0286	3	27.3307	2	0	0	0	0	5637	Scotland_N.AG	5288	Ireland_MN.SG
I2659	PB1794	9.2867	9.2867	1	0	0	0	0	0	0	5637	Scotland_N.AG	5486	Ireland_MN.SG
I2659	PB186	8.1549	8.1549	1	0	0	0	0	0	0	5637	Scotland_N.AG	5393	Ireland_MN.SG
I2659	PB443	12.8149	12.8149	1	12.8149	1	0	0	0	0	5637	Scotland_N.AG	5474	Ireland_MN.SG
I2659	PB768	8.7579	8.7579	1	0	0	0	0	0	0	5637	Scotland_N.AG	5475	Ireland_MN.SG
I2659	PN03	11.8831	11.8831	1	0	0	0	0	0	0	5637	Scotland_N.AG	5460	Ireland_MN.SG
I2659	PN04	12.3965	12.3965	1	12.3965	1	0	0	0	0	5637	Scotland_N.AG	5742	Ireland_EN.SG
I2659	PN05	10.3449	10.3449	1	0	0	0	0	0	0	5637	Scotland_N.AG	5729	Ireland_EN.SG
I2659	PN107	17.8994	17.8994	1	17.8994	1	17.8994	1	0	0	5637	Scotland_N.AG	5705	Ireland_EN.SG
I2659	PN12	8.9783	8.9783	1	0	0	0	0	0	0	5637	Scotland_N.AG	5383	Ireland_MN.SG
I2659	PN13	11.8385	19.9556	2	0	0	0	0	0	0	5637	Scotland_N.AG	5572	Ireland_EN_MN.SG
I2659	prs002	8.28049	8.28049	1	0	0	0	0	0	0	5637	Scotland_N.AG	5665	Ireland_Megalithic.SG
I2659	Ajvide58	9.8734	9.8734	1	0	0	0	0	0	0	5637	Scotland_N.AG	4700	Sweden_PWC.SG
I2659	I13889	13.0223	13.0223	1	13.0223	1	0	0	0	0	5637	Scotland_N.AG	5624	England_N_Megalithic.AG
I2659	I13892	9.6415	9.6415	1	0	0	0	0	0	0	5637	Scotland_N.AG	5677	England_N_Megalithic.AG
I2659	I16092	8.962	8.962	1	0	0	0	0	0	0	5637	Scotland_N.AG	5385	Czechia_N.AG
I2659	I30300	8.8053	8.8053	1	0	0	0	0	0	0	5637	Scotland_N.AG	5575	England_N_Megalithic.TW
I2659	I13893	13.37	13.37	1	13.37	1	0	0	0	0	5637	Scotland_N.AG	5517	England_N_Megalithic.AG
I2659	I13896	8.4241	8.4241	1	0	0	0	0	0	0	5637	Scotland_N.AG	5486	England_N_Megalithic_sister.I21395.daughter.I30332.AG
I2659	I30301	13.2405	30.1906	3	13.2405	1	0	0	0	0	5637	Scotland_N.AG	5575	England_N_Megalithic.TW
I2659	I30334	11.3458	30.7165	3	0	0	0	0	0	0	5637	Scotland_N.AG	5575	England_N_Megalithic.TW
I2659	I13898	13.7821	30.8188	3	13.7821	1	0	0	0	0	5637	Scotland_N.AG	5569	England_N_Megalithic_son.I30334.TW
I2659	I12437	11.526	21.4389	2	0	0	0	0	0	0	5637	Scotland_N.AG	5600	England_N_Megalithic_father.I13888.father.I21393.father.I21389.father.I30304.son.I30334.son.I30300.AG
I2659	I21385	8.4998	8.4998	1	0	0	0	0	0	0	5637	Scotland_N.AG	5680	England_N_Megalithic.TW
I2659	I21388	8.5433	8.5433	1	0	0	0	0	0	0	5637	Scotland_N.AG	5657	England_N_Megalithic_son.I30300.son.I21390.TW
I2659	I21389	10.4739	20.6672	2	0	0	0	0	0	0	5637	Scotland_N.AG	5585	England_N_Megalithic.TW
I2659	I21393	10.4005	10.4005	1	0	0	0	0	0	0	5637	Scotland_N.AG	5600	England_N_Megalithic.TW
I2659	NEO29	9.4783	9.4783	1	0	0	0	0	0	0	5637	Scotland_N.AG	5521	Denmark_SouthScandinavia_EN.SG
I2659	KH150618	11.1546	11.1546	1	0	0	0	0	0	0	5637	Scotland_N.AG	5250	Germany_Niedertiefenbach
I2660	I2791	10.0251	10.0251	1	0	0	0	0	0	0	5394	Scotland_N_mediumlowEEF.AG	5523	Hungary_LateC_Protoboleraz.AG
I2660	I2934	10.4016	19.9834	2	0	0	0	0	0	0	5394	Scotland_N_mediumlowEEF.AG	5138	Scotland_N.AG
I2660	I2978	9.3668	9.3668	1	0	0	0	0	0	0	5394	Scotland_N_mediumlowEEF.AG	5140	Scotland_N.AG
I2660	I2988	12.7155	12.7155	1	12.7155	1	0	0	0	0	5394	Scotland_N_mediumlowEEF.AG	5398	Scotland_N.AG
I2660	I3041	17.1188	34.3727	3	17.1188	1	17.1188	1	0	0	5394	Scotland_N_mediumlowEEF.AG	5440	Scotland_N_lowEEF.AG
I2660	I3085	8.0258	8.0258	1	0	0	0	0	0	0	5394	Scotland_N_mediumlowEEF.AG	5149	Scotland_N.AG
I2660	I3133	8.783	8.783	1	0	0	0	0	0	0	5394	Scotland_N_mediumlowEEF.AG	5446	Scotland_N.AG
I2660	I3135	10.7257	28.2178	3	0	0	0	0	0	0	5394	Scotland_N_mediumlowEEF.AG	5517	Scotland_N_lowEEF.AG
I2660	I3138	25.598	52.2754	3	43.343	2	43.343	2	25.598	1	5394	Scotland_N_mediumlowEEF.AG	4998	Scotland_N.AG
I2660	I5366	9.4328	9.4328	1	0	0	0	0	0	0	5394	Scotland_N_mediumlowEEF.AG	5516	England_N.AG
I2660	I5379	8.8636	8.8636	1	0	0	0	0	0	0	5394	Scotland_N_mediumlowEEF.AG	4333	England_BellBeaker_highEEF.AG
I2660	I2636	8.9983	8.9983	1	0	0	0	0	0	0	5394	Scotland_N_mediumlowEEF.AG	5397	Scotland_N.AG
I2660	I6747	8.6241	8.6241	1	0	0	0	0	0	0	5394	Scotland_N_mediumlowEEF.AG	5528	England_N.AG
I2660	I6753	8.0665	8.0665	1	0	0	0	0	0	0	5394	Scotland_N_mediumlowEEF.AG	5305	England_N.AG
I2660	I6759	11.5487	30.3003	3	0	0	0	0	0	0	5394	Scotland_N_mediumlowEEF.AG	5527	England_N.AG
I2660	I7191	8.4882	8.4882	1	0	0	0	0	0	0	5394	Scotland_N_mediumlowEEF.AG	5657	Czechia_C_Baalberge.AG
I2660	ASH3	9.7383	9.7383	1	0	0	0	0	0	0	5394	Scotland_N_mediumlowEEF.AG	5609	Ireland_EN_MN.SG
I2660	BG72	10.7379	19.3303	2	0	0	0	0	0	0	5394	Scotland_N_mediumlowEEF.AG	5467	Ireland_MN.SG
I2660	CAK68	8.617	8.617	1	0	0	0	0	0	0	5394	Scotland_N_mediumlowEEF.AG	4503	Ireland_LN.SG
I2660	CH448	8.4367	8.4367	1	0	0	0	0	0	0	5394	Scotland_N_mediumlowEEF.AG	5517	Ireland_MN.SG
I2660	NG10	8.47629	8.47629	1	0	0	0	0	0	0	5394	Scotland_N_mediumlowEEF.AG	5151	Ireland_MN.SG
I2660	PB186	9.1542	17.7652	2	0	0	0	0	0	0	5394	Scotland_N_mediumlowEEF.AG	5393	Ireland_MN.SG
I2660	PB675	8.1703	8.1703	1	0	0	0	0	0	0	5394	Scotland_N_mediumlowEEF.AG	5171	Ireland_MN.SG
I2660	PN02	8.72501	17.4308	2	0	0	0	0	0	0	5394	Scotland_N_mediumlowEEF.AG	5546	Ireland_EN_MN.SG
I2660	PN05	8.2819	8.2819	1	0	0	0	0	0	0	5394	Scotland_N_mediumlowEEF.AG	5729	Ireland_EN.SG
I2660	PN06	8.98989	8.98989	1	0	0	0	0	0	0	5394	Scotland_N_mediumlowEEF.AG	5459	Ireland_MN.SG
I2660	PN107	8.8161	8.8161	1	0	0	0	0	0	0	5394	Scotland_N_mediumlowEEF.AG	5705	Ireland_EN.SG
I2660	PN10_PN113	9.8029	9.8029	1	0	0	0	0	0	0	5394	Scotland_N_mediumlowEEF.AG	5746	Ireland_EN.SG
I2660	PN13	11.171	19.3793	2	0	0	0	0	0	0	5394	Scotland_N_mediumlowEEF.AG	5572	Ireland_EN_MN.SG
I2660	PN16	8.164	8.164	1	0	0	0	0	0	0	5394	Scotland_N_mediumlowEEF.AG	5442	Ireland_MN.SG
I2660	prs016	8.2088	8.2088	1	0	0	0	0	0	0	5394	Scotland_N_mediumlowEEF.AG	5539	Ireland_Megalithic.SG
I2660	611	9.2018	9.2018	1	0	0	0	0	0	0	5394	Scotland_N_mediumlowEEF.AG	5418	England_Trumpington_N.SG
I2660	613	8.0732	8.0732	1	0	0	0	0	0	0	5394	Scotland_N_mediumlowEEF.AG	5639	England_Trumpington_N_brother.TRPTN_611.SG
I2660	I13889	9.0865	9.0865	1	0	0	0	0	0	0	5394	Scotland_N_mediumlowEEF.AG	5624	England_N_Megalithic.AG
I2660	I13892	9.38309	18.3363	2	0	0	0	0	0	0	5394	Scotland_N_mediumlowEEF.AG	5677	England_N_Megalithic.AG
I2660	I14326	10.7942	10.7942	1	0	0	0	0	0	0	5394	Scotland_N_mediumlowEEF.AG	4908	England_N.AG
I2660	I13893	8.0462	8.0462	1	0	0	0	0	0	0	5394	Scotland_N_mediumlowEEF.AG	5517	England_N_Megalithic.AG
I2660	I20818	13.165	13.165	1	13.165	1	0	0	0	0	5394	Scotland_N_mediumlowEEF.AG	5545	England_N_Megalithic.TW
I2660	I30293	8.5752	8.5752	1	0	0	0	0	0	0	5394	Scotland_N_mediumlowEEF.AG	5575	England_N_Megalithic.TW
I2660	I30301	9.9806	9.9806	1	0	0	0	0	0	0	5394	Scotland_N_mediumlowEEF.AG	5575	England_N_Megalithic.TW
I2660	I13897	9.5322	9.5322	1	0	0	0	0	0	0	5394	Scotland_N_mediumlowEEF.AG	5600	England_N_Megalithic_lc.TW
I2660	I21385	10.1155	10.1155	1	0	0	0	0	0	0	5394	Scotland_N_mediumlowEEF.AG	5680	England_N_Megalithic.TW
I2660	NEO624	8.03691	8.03691	1	0	0	0	0	0	0	5394	Scotland_N_mediumlowEEF.AG	4903	Great_Britain_Orkney_N.SG
I2660	NEO847	9.7643	9.7643	1	0	0	0	0	0	0	5394	Scotland_N_mediumlowEEF.AG	5416	Great_Britain_Gloucestershire_N.SG
I2660	KH180120	8.1749	8.1749	1	0	0	0	0	0	0	5394	Scotland_N_mediumlowEEF.AG	5150	Germany_Warburg
I2660	KH210846	9.045	9.045	1	0	0	0	0	0	0	5394	Scotland_N_mediumlowEEF.AG	5225	Germany_Sorsum
I2660	KH210902	9.6813	9.6813	1	0	0	0	0	0	0	5394	Scotland_N_mediumlowEEF.AG	5225	Germany_Sorsum
I2691	I2933	8.07129	8.07129	1	0	0	0	0	0	0	5613	Scotland_N_mediumlowEEF.AG	4877	Scotland_N.AG
I2691	I2935	15.4493	26.6713	2	15.4493	1	0	0	0	0	5613	Scotland_N_mediumlowEEF.AG	5115	Scotland_N.AG
I2691	I2978	8.8823	17.1846	2	0	0	0	0	0	0	5613	Scotland_N_mediumlowEEF.AG	5140	Scotland_N.AG
I2691	I2979	20.1385	29.0607	2	20.1385	1	20.1385	1	20.1385	1	5613	Scotland_N_mediumlowEEF.AG	5104	Scotland_N.AG
I2691	I3005	12.9582	12.9582	1	12.9582	1	0	0	0	0	5613	Scotland_N_mediumlowEEF.AG	5657	England_N.AG
I2691	I3041	18.375	48.7125	4	30.6703	2	18.375	1	0	0	5613	Scotland_N_mediumlowEEF.AG	5440	Scotland_N_lowEEF.AG
I2691	I3068	9.7532	9.7532	1	0	0	0	0	0	0	5613	Scotland_N_mediumlowEEF.AG	5533	England_N.AG
I2691	I3085	10.3076	10.3076	1	0	0	0	0	0	0	5613	Scotland_N_mediumlowEEF.AG	5149	Scotland_N.AG
I2691	I3134	11.4455	11.4455	1	0	0	0	0	0	0	5613	Scotland_N_mediumlowEEF.AG	5461	Scotland_N.AG
I2691	I3135	22.0957	83.604	6	56.4029	3	56.4029	3	22.0957	1	5613	Scotland_N_mediumlowEEF.AG	5517	Scotland_N_lowEEF.AG
I2691	I3136	15.7595	15.7595	1	15.7595	1	0	0	0	0	5613	Scotland_N_mediumlowEEF.AG	5397	Scotland_N.AG
I2691	I3138	12.2699	12.2699	1	12.2699	1	0	0	0	0	5613	Scotland_N_mediumlowEEF.AG	4998	Scotland_N.AG
I2691	I2636	17.0641	17.0641	1	17.0641	1	17.0641	1	0	0	5613	Scotland_N_mediumlowEEF.AG	5397	Scotland_N.AG
I2691	I6746	11.2903	11.2903	1	0	0	0	0	0	0	5613	Scotland_N_mediumlowEEF.AG	5526	England_N.AG
I2691	I6747	8.9865	8.9865	1	0	0	0	0	0	0	5613	Scotland_N_mediumlowEEF.AG	5528	England_N.AG
I2691	I7554	27.0566	36.4077	2	27.0566	1	27.0566	1	27.0566	1	5613	Scotland_N_mediumlowEEF.AG	5182	Scotland_N.AG
I2691	CAK530	9.39059	9.39059	1	0	0	0	0	0	0	5613	Scotland_N_mediumlowEEF.AG	4711	Ireland_LN.SG
I2691	PB186	12.1694	20.6249	2	12.1694	1	0	0	0	0	5613	Scotland_N_mediumlowEEF.AG	5393	Ireland_MN.SG
I2691	PN02	10.2501	20.4823	2	0	0	0	0	0	0	5613	Scotland_N_mediumlowEEF.AG	5546	Ireland_EN_MN.SG
I2691	PN06	11.9702	11.9702	1	0	0	0	0	0	0	5613	Scotland_N_mediumlowEEF.AG	5459	Ireland_MN.SG
I2691	PN07	12.2103	12.2103	1	12.2103	1	0	0	0	0	5613	Scotland_N_mediumlowEEF.AG	5410	Ireland_MN.SG
I2691	PN107	9.7661	9.7661	1	0	0	0	0	0	0	5613	Scotland_N_mediumlowEEF.AG	5705	Ireland_EN.SG
I2691	PN10_PN113	15.0158	25.2771	2	15.0158	1	0	0	0	0	5613	Scotland_N_mediumlowEEF.AG	5746	Ireland_EN.SG
I2691	PN13	8.1532	8.1532	1	0	0	0	0	0	0	5613	Scotland_N_mediumlowEEF.AG	5572	Ireland_EN_MN.SG
I2691	prs002	10.1814	10.1814	1	0	0	0	0	0	0	5613	Scotland_N_mediumlowEEF.AG	5665	Ireland_Megalithic.SG
I2691	611	9.8632	9.8632	1	0	0	0	0	0	0	5613	Scotland_N_mediumlowEEF.AG	5418	England_Trumpington_N.SG
I2691	I30300	8.2294	8.2294	1	0	0	0	0	0	0	5613	Scotland_N_mediumlowEEF.AG	5575	England_N_Megalithic.TW
I2691	I13893	25.9303	25.9303	1	25.9303	1	25.9303	1	25.9303	1	5613	Scotland_N_mediumlowEEF.AG	5517	England_N_Megalithic.AG
I2691	I30299	9.0161	9.0161	1	0	0	0	0	0	0	5613	Scotland_N_mediumlowEEF.AG	5535	England_N_Megalithic_son.I30300.son.I30302.brother.I12440.TW
I2691	I30334	8.9688	8.9688	1	0	0	0	0	0	0	5613	Scotland_N_mediumlowEEF.AG	5575	England_N_Megalithic.TW
I2691	I13890	8.8761	8.8761	1	0	0	0	0	0	0	5613	Scotland_N_mediumlowEEF.AG	5600	England_N_Megalithic.TW
I2691	I13899	8.3599	8.3599	1	0	0	0	0	0	0	5613	Scotland_N_mediumlowEEF.AG	5600	England_N_Megalithic.TW
I2691	I20821	8.4512	8.4512	1	0	0	0	0	0	0	5613	Scotland_N_mediumlowEEF.AG	5486	England_N_Megalithic.TW
I2691	I13895	9.35199	17.9643	2	0	0	0	0	0	0	5613	Scotland_N_mediumlowEEF.AG	5600	England_N_Megalithic_father.I20821.son.I21390.TW
I2691	I12437	8.4262	8.4262	1	0	0	0	0	0	0	5613	Scotland_N_mediumlowEEF.AG	5600	England_N_Megalithic_father.I13888.father.I21393.father.I21389.father.I30304.son.I30334.son.I30300.AG
I2691	I21385	8.1278	8.1278	1	0	0	0	0	0	0	5613	Scotland_N_mediumlowEEF.AG	5680	England_N_Megalithic.TW
I2691	I21389	10.9234	10.9234	1	0	0	0	0	0	0	5613	Scotland_N_mediumlowEEF.AG	5585	England_N_Megalithic.TW
I2691	I21393	8.2766	8.2766	1	0	0	0	0	0	0	5613	Scotland_N_mediumlowEEF.AG	5600	England_N_Megalithic.TW
I2691	NEO624	21.6055	21.6055	1	21.6055	1	21.6055	1	21.6055	1	5613	Scotland_N_mediumlowEEF.AG	4903	Great_Britain_Orkney_N.SG
I2691	NEO625	21.1634	21.1634	1	21.1634	1	21.1634	1	21.1634	1	5613	Scotland_N_mediumlowEEF.AG	5138	Great_Britain_Orkney_N_father.NEO624.SG
I2691	NEO847	14.7119	14.7119	1	14.7119	1	0	0	0	0	5613	Scotland_N_mediumlowEEF.AG	5416	Great_Britain_Gloucestershire_N.SG
I2691	ROS018	13.3514	13.3514	1	13.3514	1	0	0	0	0	5613	Scotland_N_mediumlowEEF.AG	5148	Sweden_Rossberga_N.SG
I2691	KH180059	9.16301	9.16301	1	0	0	0	0	0	0	5613	Scotland_N_mediumlowEEF.AG	5084	Germany_Altendorf
I2691	KH180137_KH182329	8.2482	8.2482	1	0	0	0	0	0	0	5613	Scotland_N_mediumlowEEF.AG	5137	Germany_Altendorf
I2691	KH210908	8.0006	8.0006	1	0	0	0	0	0	0	5613	Scotland_N_mediumlowEEF.AG	5225	Germany_Sorsum
I2691	KH210936	13.5621	13.5621	1	13.5621	1	0	0	0	0	5613	Scotland_N_mediumlowEEF.AG	5225	Germany_Sorsum
I2741	I0408	8.3568	8.3568	1	0	0	0	0	0	0	4245	Hungary_EBA_BellBeaker.AG	5686	Spain_MLN.AG
I2741	I1978	8.31441	8.31441	1	0	0	0	0	0	0	4245	Hungary_EBA_BellBeaker.AG	4825	Spain_C.AG
I2741	I2370	8.04721	8.04721	1	0	0	0	0	0	0	4245	Hungary_EBA_BellBeaker.AG	5122	Hungary_LateC_Baden.AG
I2741	I3122	13.8862	13.8862	1	13.8862	1	0	0	0	0	4245	Hungary_EBA_BellBeaker.AG	4073	Italy_Sicily_EBA.AG
I2741	I0117	12.5026	12.5026	1	12.5026	1	0	0	0	0	4245	Hungary_EBA_BellBeaker.AG	4092	Germany_EBA_Unetice.AG
I2741	PNL002	10.0871	10.0871	1	0	0	0	0	0	0	4245	Hungary_EBA_BellBeaker.AG	4653	Czechia_EBA_CordedWare.AG
I2741	I14675	9.2356	9.2356	1	0	0	0	0	0	0	4245	Hungary_EBA_BellBeaker.AG	4021	Italy_Sardinia_C_MonteClaro.AG
I2741	KH180126	8.2761	8.2761	1	0	0	0	0	0	0	4245	Hungary_EBA_BellBeaker.AG	5150	Germany_Warburg
I2753	I1563	13.1881	13.1881	1	13.1881	1	0	0	0	0	5085	Hungary_LateC_Baden.AG	5448	Germany_Blatterhohle_MN.AG
I2753	I0114	8.339	8.339	1	0	0	0	0	0	0	5085	Hungary_LateC_Baden.AG	4002	Germany_EBA_Unetice_brother.I0117.AG
I2753	BRZ002	8.3642	8.3642	1	0	0	0	0	0	0	5085	Hungary_LateC_Baden.AG	5521	Czechia_N_TRB.AG
I2753	HOL002	9.15949	17.5397	2	0	0	0	0	0	0	5085	Hungary_LateC_Baden.AG	5140	Czechia_N_Baden.AG
I2753	RISE1248	9.2576	9.2576	1	0	0	0	0	0	0	5085	Hungary_LateC_Baden.AG	4725	Poland_Ksiaznice_GlobularAmphora.SG
I2753	I21389	8.5136	8.5136	1	0	0	0	0	0	0	5085	Hungary_LateC_Baden.AG	5585	England_N_Megalithic.TW
I2753	HJE010	8.9938	8.9938	1	0	0	0	0	0	0	5085	Hungary_LateC_Baden.AG	5075	Sweden_HjelmarsRor_N.SG
I2753	KH150195_KH150196_KH150616	9.30328	9.30328	1	0	0	0	0	0	0	5085	Hungary_LateC_Baden.AG	5250	Germany_Niedertiefenbach
I2753	KH180137_KH182329	8.3102	8.3102	1	0	0	0	0	0	0	5085	Hungary_LateC_Baden.AG	5137	Germany_Altendorf
I2753	KH180071	13.2939	13.2939	1	13.2939	1	0	0	0	0	5085	Hungary_LateC_Baden.AG	5150	Germany_Warburg
I2753	KH180077	8.48041	8.48041	1	0	0	0	0	0	0	5085	Hungary_LateC_Baden.AG	5150	Germany_Warburg
I2753	KH180390	14.6601	14.6601	1	14.6601	1	0	0	0	0	5085	Hungary_LateC_Baden.AG	5170	Germany_Rimbeck
I2753	KH210853	8.0476	8.0476	1	0	0	0	0	0	0	5085	Hungary_LateC_Baden.AG	5225	Germany_Sorsum
I2753	KH210899	8.0552	8.0552	1	0	0	0	0	0	0	5085	Hungary_LateC_Baden.AG	5225	Germany_Sorsum
I2753	KH210954	8.6485	8.6485	1	0	0	0	0	0	0	5085	Hungary_LateC_Baden.AG	5225	Germany_Sorsum
I2753	KH180089	8.8782	8.8782	1	0	0	0	0	0	0	5085	Hungary_LateC_Baden.AG	5150	Germany_Warburg
I2753	KH200127_KH200128_KH201232	8.8251	8.8251	1	0	0	0	0	0	0	5085	Hungary_LateC_Baden.AG	5150	Germany_Warburg
I2753	KH200155	13.2954	13.2954	1	13.2954	1	0	0	0	0	5085	Hungary_LateC_Baden.AG	5150	Germany_Warburg
I2753	KH201256	9.7152	9.7152	1	0	0	0	0	0	0	5085	Hungary_LateC_Baden.AG	5150	Germany_Warburg
I2753	KH210992	17.4219	17.4219	1	17.4219	1	17.4219	1	0	0	5085	Hungary_LateC_Baden.AG	5000	Germany_Zuschen
I2788	GB	11.7513	11.7513	1	0	0	0	0	0	0	5685	Hungary_LateC_Protoboleraz.AG	5389	Romania_C_oHG.SG
I2788	KH150621	8.39761	8.39761	1	0	0	0	0	0	0	5685	Hungary_LateC_Protoboleraz.AG	5250	Germany_Niedertiefenbach
I2790	I2791	8.9464	8.9464	1	0	0	0	0	0	0	5625	Hungary_LateC_Protoboleraz.AG	5523	Hungary_LateC_Protoboleraz.AG
I2790	I11158	8.521	8.521	1	0	0	0	0	0	0	5625	Hungary_LateC_Protoboleraz.AG	4025	Czechia_EBA_son.I14193_son.I7198.AG
I2790	I5119	8.68421	8.68421	1	0	0	0	0	0	0	5625	Hungary_LateC_Protoboleraz.AG	5097	Hungary_LateC_Baden.AG
I2790	UNTA58_68Sk2	8.25801	8.25801	1	0	0	0	0	0	0	5625	Hungary_LateC_Protoboleraz.AG	4347	Germany_Lech_BellBeaker_possible.contam.AG
I2790	N19	11.0611	11.0611	1	0	0	0	0	0	0	5625	Hungary_LateC_Protoboleraz.AG	5490	Poland_TRB_o.SG
I2790	N38	9.192	9.192	1	0	0	0	0	0	0	5625	Hungary_LateC_Protoboleraz.AG	4959	Poland_GlobularAmphora.SG
I2790	KH180120	8.2516	8.2516	1	0	0	0	0	0	0	5625	Hungary_LateC_Protoboleraz.AG	5150	Germany_Warburg
I2791	I6677	8.3946	8.3946	1	0	0	0	0	0	0	5523	Hungary_LateC_Protoboleraz.AG	5550	Czechia_C_Baalberge.AG
I2791	BRZ002	16.0377	16.0377	1	16.0377	1	16.0377	1	0	0	5523	Hungary_LateC_Protoboleraz.AG	5521	Czechia_N_TRB.AG
I2791	TOU001	9.1151	9.1151	1	0	0	0	0	0	0	5523	Hungary_LateC_Protoboleraz.AG	4712	Czechia_N_Rivnac.AG
I2791	TRM006	9.3602	9.3602	1	0	0	0	0	0	0	5523	Hungary_LateC_Protoboleraz.AG	4644	Czechia_EBA_CordedWare.AG
I2791	N18	11.9018	11.9018	1	0	0	0	0	0	0	5523	Hungary_LateC_Protoboleraz.AG	5459	Poland_TRB.SG
I2791	N19	9.32289	9.32289	1	0	0	0	0	0	0	5523	Hungary_LateC_Protoboleraz.AG	5490	Poland_TRB_o.SG
I2791	N45	9.3904	9.3904	1	0	0	0	0	0	0	5523	Hungary_LateC_Protoboleraz.AG	4375	Poland_CordedWare_3.SG
I2791	I14170	8.8479	8.8479	1	0	0	0	0	0	0	5523	Hungary_LateC_Protoboleraz.AG	5850	Czechia_C_Baalberge.AG
I2791	I15942	8.9268	8.9268	1	0	0	0	0	0	0	5523	Hungary_LateC_Protoboleraz.AG	4297	Italy_Sardinia_N.AG
I2791	KH210849_KH220441	8.2309	8.2309	1	0	0	0	0	0	0	5523	Hungary_LateC_Protoboleraz.AG	5225	Germany_Sorsum
I2932	I2934	10.0772	10.0772	1	0	0	0	0	0	0	4433	Scotland_N.AG	5138	Scotland_N.AG
I2932	I2978	12.4274	12.4274	1	12.4274	1	0	0	0	0	4433	Scotland_N.AG	5140	Scotland_N.AG
I2932	I2979	12.0609	12.0609	1	12.0609	1	0	0	0	0	4433	Scotland_N.AG	5104	Scotland_N.AG
I2932	I3068	8.3225	8.3225	1	0	0	0	0	0	0	4433	Scotland_N.AG	5533	England_N.AG
I2932	I5359	10.1544	10.1544	1	0	0	0	0	0	0	4433	Scotland_N.AG	5600	Wales_N.AG
I2932	I6746	19.6957	19.6957	1	19.6957	1	19.6957	1	0	0	4433	Scotland_N.AG	5526	England_N.AG
I2932	I6753	8.0237	8.0237	1	0	0	0	0	0	0	4433	Scotland_N.AG	5305	England_N.AG
I2932	I6755	9.1555	9.1555	1	0	0	0	0	0	0	4433	Scotland_N.AG	5528	England_N.AG
I2932	ASH3	8.9099	8.9099	1	0	0	0	0	0	0	4433	Scotland_N.AG	5609	Ireland_EN_MN.SG
I2932	GNM1076	8.5223	8.5223	1	0	0	0	0	0	0	4433	Scotland_N.AG	5135	Ireland_MN.SG
I2932	PB1327	10.1071	10.1071	1	0	0	0	0	0	0	4433	Scotland_N.AG	5407	Ireland_MN.SG
I2932	PB443	8.28741	8.28741	1	0	0	0	0	0	0	4433	Scotland_N.AG	5474	Ireland_MN.SG
I2932	PN05	8.6802	8.6802	1	0	0	0	0	0	0	4433	Scotland_N.AG	5729	Ireland_EN.SG
I2932	PN06	9.824	9.824	1	0	0	0	0	0	0	4433	Scotland_N.AG	5459	Ireland_MN.SG
I2932	2H17	8.3261	8.3261	1	0	0	0	0	0	0	4433	Scotland_N.AG	5157	France_MontAime_MLN_father.or.son.2H10.SG
I2932	I13889	11.502	11.502	1	0	0	0	0	0	0	4433	Scotland_N.AG	5624	England_N_Megalithic.AG
I2932	I13892	8.29639	8.29639	1	0	0	0	0	0	0	4433	Scotland_N.AG	5677	England_N_Megalithic.AG
I2932	I30299	8.5489	8.5489	1	0	0	0	0	0	0	4433	Scotland_N.AG	5535	England_N_Megalithic_son.I30300.son.I30302.brother.I12440.TW
I2932	I13897	9.22489	18.1937	2	0	0	0	0	0	0	4433	Scotland_N.AG	5600	England_N_Megalithic_lc.TW
I2932	I21385	8.2274	8.2274	1	0	0	0	0	0	0	4433	Scotland_N.AG	5680	England_N_Megalithic.TW
I2932	LAN008	9.06941	9.06941	1	0	0	0	0	0	0	4433	Scotland_N.AG	4950	Sweden_Landbogarden_N.SG
I2932	KH170035_KH210851	8.0798	8.0798	1	0	0	0	0	0	0	4433	Scotland_N.AG	5225	Germany_Sorsum
I2932	KH200134_KH201258	8.4218	8.4218	1	0	0	0	0	0	0	4433	Scotland_N.AG	5150	Germany_Warburg
I2933	I2934	11.3832	11.3832	1	0	0	0	0	0	0	4877	Scotland_N.AG	5138	Scotland_N.AG
I2933	I2977	12.1339	12.1339	1	12.1339	1	0	0	0	0	4877	Scotland_N.AG	4843	Scotland_N.AG
I2933	I2978	8.11419	8.11419	1	0	0	0	0	0	0	4877	Scotland_N.AG	5140	Scotland_N.AG
I2933	I3041	15.2482	23.616	2	15.2482	1	0	0	0	0	4877	Scotland_N.AG	5440	Scotland_N_lowEEF.AG
I2933	I3134	12.9502	12.9502	1	12.9502	1	0	0	0	0	4877	Scotland_N.AG	5461	Scotland_N.AG
I2933	I3138	8.3897	8.3897	1	0	0	0	0	0	0	4877	Scotland_N.AG	4998	Scotland_N.AG
I2933	I3256	8.97659	8.97659	1	0	0	0	0	0	0	4877	Scotland_N.AG	4063	England_BellBeaker.AG
I2933	I3269	8.2808	8.2808	1	0	0	0	0	0	0	4877	Scotland_N.AG	4850	Spain_C.AG
I2933	I2636	10.9343	10.9343	1	0	0	0	0	0	0	4877	Scotland_N.AG	5397	Scotland_N.AG
I2933	I6747	8.9197	8.9197	1	0	0	0	0	0	0	4877	Scotland_N.AG	5528	England_N.AG
I2933	I6757	8.7587	8.7587	1	0	0	0	0	0	0	4877	Scotland_N.AG	5493	England_N.AG
I2933	I6759	8.383	8.383	1	0	0	0	0	0	0	4877	Scotland_N.AG	5527	England_N.AG
I2933	I6766	8.5902	8.5902	1	0	0	0	0	0	0	4877	Scotland_N.AG	5100	Scotland_N.AG
I2933	I7554	8.60748	8.60748	1	0	0	0	0	0	0	4877	Scotland_N.AG	5182	Scotland_N.AG
I2933	PRE001	9.1439	9.1439	1	0	0	0	0	0	0	4877	Scotland_N.AG	4625	Czechia_N_GlobularAmphora.AG
I2933	PSS4693	8.01181	8.01181	1	0	0	0	0	0	0	4877	Scotland_N.AG	5396	France_GrandEst_MN.SG
I2933	ANN1	9.4412	18.8284	2	0	0	0	0	0	0	4877	Scotland_N.AG	5405	Ireland_MN.SG
I2933	ASH3	11.0668	20.9552	2	0	0	0	0	0	0	4877	Scotland_N.AG	5609	Ireland_EN_MN.SG
I2933	GNM1076	8.0258	8.0258	1	0	0	0	0	0	0	4877	Scotland_N.AG	5135	Ireland_MN.SG
I2933	PB1794	10.3567	10.3567	1	0	0	0	0	0	0	4877	Scotland_N.AG	5486	Ireland_MN.SG
I2933	PB186	9.6505	34.8966	4	0	0	0	0	0	0	4877	Scotland_N.AG	5393	Ireland_MN.SG
I2933	PB357	8.1385	8.1385	1	0	0	0	0	0	0	4877	Scotland_N.AG	5545	Ireland_EN_MN.SG
I2933	PB443	8.1865	8.1865	1	0	0	0	0	0	0	4877	Scotland_N.AG	5474	Ireland_MN.SG
I2933	PB672	8.1988	8.1988	1	0	0	0	0	0	0	4877	Scotland_N.AG	5442	Ireland_MN.SG
I2933	PN03	12.8757	20.9374	2	12.8757	1	0	0	0	0	4877	Scotland_N.AG	5460	Ireland_MN.SG
I2933	PN06	9.40349	9.40349	1	0	0	0	0	0	0	4877	Scotland_N.AG	5459	Ireland_MN.SG
I2933	PN10_PN113	9.356	9.356	1	0	0	0	0	0	0	4877	Scotland_N.AG	5746	Ireland_EN.SG
I2933	PN13	10.5884	10.5884	1	0	0	0	0	0	0	4877	Scotland_N.AG	5572	Ireland_EN_MN.SG
I2933	PN16	8.1072	8.1072	1	0	0	0	0	0	0	4877	Scotland_N.AG	5442	Ireland_MN.SG
I2933	bal004	14.3746	14.3746	1	14.3746	1	0	0	0	0	4877	Scotland_N.AG	5186	Scotland_Megalithic.SG
I2933	I13892	9.76089	9.76089	1	0	0	0	0	0	0	4877	Scotland_N.AG	5677	England_N_Megalithic.AG
I2933	I15030	11.0591	11.0591	1	0	0	0	0	0	0	4877	Scotland_N.AG	5700	France_N.AG
I2933	I30300	10.7877	10.7877	1	0	0	0	0	0	0	4877	Scotland_N.AG	5575	England_N_Megalithic.TW
I2933	I30293	8.3853	8.3853	1	0	0	0	0	0	0	4877	Scotland_N.AG	5575	England_N_Megalithic.TW
I2933	I13899	9.2823	9.2823	1	0	0	0	0	0	0	4877	Scotland_N.AG	5600	England_N_Megalithic.TW
I2933	I13895	9.9166	9.9166	1	0	0	0	0	0	0	4877	Scotland_N.AG	5600	England_N_Megalithic_father.I20821.son.I21390.TW
I2933	I12437	10.1675	10.1675	1	0	0	0	0	0	0	4877	Scotland_N.AG	5600	England_N_Megalithic_father.I13888.father.I21393.father.I21389.father.I30304.son.I30334.son.I30300.AG
I2933	I21389	9.6298	9.6298	1	0	0	0	0	0	0	4877	Scotland_N.AG	5585	England_N_Megalithic.TW
I2933	I21393	9.9307	9.9307	1	0	0	0	0	0	0	4877	Scotland_N.AG	5600	England_N_Megalithic.TW
I2934	I2935	25.5608	90.328	6	61.7243	3	61.7243	3	25.5608	1	5138	Scotland_N.AG	5115	Scotland_N.AG
I2934	I2978	26.0949	65.9183	4	48.8783	2	48.8783	2	48.8783	2	5138	Scotland_N.AG	5140	Scotland_N.AG
I2934	I2979	18.1595	117.613	10	51.6075	3	35.9583	2	0	0	5138	Scotland_N.AG	5104	Scotland_N.AG
I2934	I2980	10.323	28.0628	3	0	0	0	0	0	0	5138	Scotland_N.AG	5173	Scotland_N.AG
I2934	I2988	9.8343	9.8343	1	0	0	0	0	0	0	5138	Scotland_N.AG	5398	Scotland_N.AG
I2934	I3005	9.0672	17.6771	2	0	0	0	0	0	0	5138	Scotland_N.AG	5657	England_N.AG
I2934	I3085	13.6579	39.4149	4	13.6579	1	0	0	0	0	5138	Scotland_N.AG	5149	Scotland_N.AG
I2934	I3133	10.973	10.973	1	0	0	0	0	0	0	5138	Scotland_N.AG	5446	Scotland_N.AG
I2934	I3136	10.3817	19.058	2	0	0	0	0	0	0	5138	Scotland_N.AG	5397	Scotland_N.AG
I2934	I3138	10.5251	10.5251	1	0	0	0	0	0	0	5138	Scotland_N.AG	4998	Scotland_N.AG
I2934	I5359	9.1534	9.1534	1	0	0	0	0	0	0	5138	Scotland_N.AG	5600	Wales_N.AG
I2934	I5366	9.4026	9.4026	1	0	0	0	0	0	0	5138	Scotland_N.AG	5516	England_N.AG
I2934	I2636	14.1011	71.1628	6	39.8367	3	0	0	0	0	5138	Scotland_N.AG	5397	Scotland_N.AG
I2934	I6757	8.9073	17.4269	2	0	0	0	0	0	0	5138	Scotland_N.AG	5493	England_N.AG
I2934	I6759	9.6922	9.6922	1	0	0	0	0	0	0	5138	Scotland_N.AG	5527	England_N.AG
I2934	I6761	8.3833	8.3833	1	0	0	0	0	0	0	5138	Scotland_N.AG	5525	England_N.AG
I2934	I7554	12.2715	12.2715	1	12.2715	1	0	0	0	0	5138	Scotland_N.AG	5182	Scotland_N.AG
I2934	BLS002	8.135	8.135	1	0	0	0	0	0	0	5138	Scotland_N.AG	4692	Czechia_N_GlobularAmphora.AG
I2934	I6762	9.4819	9.4819	1	0	0	0	0	0	0	5138	Scotland_N.AG	5700	England_N.AG
I2934	CAK531	8.9239	26.181	3	0	0	0	0	0	0	5138	Scotland_N.AG	4701	Ireland_LN.SG
I2934	PB675	8.1429	8.1429	1	0	0	0	0	0	0	5138	Scotland_N.AG	5171	Ireland_MN.SG
I2934	PN07	9.7405	9.7405	1	0	0	0	0	0	0	5138	Scotland_N.AG	5410	Ireland_MN.SG
I2934	bal004	10.9657	19.5311	2	0	0	0	0	0	0	5138	Scotland_N.AG	5186	Scotland_Megalithic.SG
I2934	I13889	9.8989	9.8989	1	0	0	0	0	0	0	5138	Scotland_N.AG	5624	England_N_Megalithic.AG
I2934	I14167	8.2482	8.2482	1	0	0	0	0	0	0	5138	Scotland_N.AG	5850	Czechia_C_Baalberge.AG
I2934	I30293	8.52931	8.52931	1	0	0	0	0	0	0	5138	Scotland_N.AG	5575	England_N_Megalithic.TW
I2934	I30299	8.20491	8.20491	1	0	0	0	0	0	0	5138	Scotland_N.AG	5535	England_N_Megalithic_son.I30300.son.I30302.brother.I12440.TW
I2934	I30301	9.4206	9.4206	1	0	0	0	0	0	0	5138	Scotland_N.AG	5575	England_N_Megalithic.TW
I2934	I20821	8.3021	8.3021	1	0	0	0	0	0	0	5138	Scotland_N.AG	5486	England_N_Megalithic.TW
I2934	I21389	11.4467	11.4467	1	0	0	0	0	0	0	5138	Scotland_N.AG	5585	England_N_Megalithic.TW
I2934	NEO624	22.4917	62.6411	4	53.5739	3	40.4957	2	22.4917	1	5138	Scotland_N.AG	4903	Great_Britain_Orkney_N.SG
I2934	NEO625	34.9591	168.046	11	112.955	5	98.6702	4	78.7822	3	5138	Scotland_N.AG	5138	Great_Britain_Orkney_N_father.NEO624.SG
I2934	HJE013	9.9376	9.9376	1	0	0	0	0	0	0	5138	Scotland_N.AG	5075	Sweden_HjelmarsRor_N.SG
I2934	KH150618	8.5121	8.5121	1	0	0	0	0	0	0	5138	Scotland_N.AG	5250	Germany_Niedertiefenbach
I2934	KH180059	8.3221	8.3221	1	0	0	0	0	0	0	5138	Scotland_N.AG	5084	Germany_Altendorf
I2934	KH210853	8.1945	8.1945	1	0	0	0	0	0	0	5138	Scotland_N.AG	5225	Germany_Sorsum
I2935	I2977	12.9824	12.9824	1	12.9824	1	0	0	0	0	5115	Scotland_N.AG	4843	Scotland_N.AG
I2935	I2978	21.5792	71.1875	5	53.3946	3	39.4484	2	21.5792	1	5115	Scotland_N.AG	5140	Scotland_N.AG
I2935	I2979	9.80309	17.9886	2	0	0	0	0	0	0	5115	Scotland_N.AG	5104	Scotland_N.AG
I2935	I2980	15.7359	25.1701	2	15.7359	1	0	0	0	0	5115	Scotland_N.AG	5173	Scotland_N.AG
I2935	I3005	12.5926	12.5926	1	12.5926	1	0	0	0	0	5115	Scotland_N.AG	5657	England_N.AG
I2935	I3041	11.6081	11.6081	1	0	0	0	0	0	0	5115	Scotland_N.AG	5440	Scotland_N_lowEEF.AG
I2935	I3085	9.9607	35.879	4	0	0	0	0	0	0	5115	Scotland_N.AG	5149	Scotland_N.AG
I2935	I3135	13.5664	13.5664	1	13.5664	1	0	0	0	0	5115	Scotland_N.AG	5517	Scotland_N_lowEEF.AG
I2935	I3136	13.8891	23.474	2	13.8891	1	0	0	0	0	5115	Scotland_N.AG	5397	Scotland_N.AG
I2935	I3138	11.6316	11.6316	1	0	0	0	0	0	0	5115	Scotland_N.AG	4998	Scotland_N.AG
I2935	I5359	12.9095	21.4943	2	12.9095	1	0	0	0	0	5115	Scotland_N.AG	5600	Wales_N.AG
I2935	I2636	17.9376	36.137	3	17.9376	1	17.9376	1	0	0	5115	Scotland_N.AG	5397	Scotland_N.AG
I2935	I6759	11.3491	11.3491	1	0	0	0	0	0	0	5115	Scotland_N.AG	5527	England_N.AG
I2935	I7554	15.8487	33.4287	3	15.8487	1	0	0	0	0	5115	Scotland_N.AG	5182	Scotland_N.AG
I2935	ASH3	11.7742	11.7742	1	0	0	0	0	0	0	5115	Scotland_N.AG	5609	Ireland_EN_MN.SG
I2935	BG72	9.7141	9.7141	1	0	0	0	0	0	0	5115	Scotland_N.AG	5467	Ireland_MN.SG
I2935	PB2031	8.14281	8.14281	1	0	0	0	0	0	0	5115	Scotland_N.AG	5431	Ireland_MN.SG
I2935	PB443	15.54	15.54	1	15.54	1	0	0	0	0	5115	Scotland_N.AG	5474	Ireland_MN.SG
I2935	PB581	8.3513	8.3513	1	0	0	0	0	0	0	5115	Scotland_N.AG	5413	Ireland_MN.SG
I2935	PN07	8.258	8.258	1	0	0	0	0	0	0	5115	Scotland_N.AG	5410	Ireland_MN.SG
I2935	bal004	10.6798	10.6798	1	0	0	0	0	0	0	5115	Scotland_N.AG	5186	Scotland_Megalithic.SG
I2935	I13892	8.7738	8.7738	1	0	0	0	0	0	0	5115	Scotland_N.AG	5677	England_N_Megalithic.AG
I2935	I14172	9.649	9.649	1	0	0	0	0	0	0	5115	Scotland_N.AG	5850	Czechia_C_Baalberge.AG
I2935	I14176	9.81021	9.81021	1	0	0	0	0	0	0	5115	Scotland_N.AG	5550	Czechia_C_Baalberge.AG
I2935	I14326	8.4942	8.4942	1	0	0	0	0	0	0	5115	Scotland_N.AG	4908	England_N.AG
I2935	I21390	11.5407	20.0883	2	0	0	0	0	0	0	5115	Scotland_N.AG	5630	England_N_Megalithic.AG
I2935	I30300	8.68611	8.68611	1	0	0	0	0	0	0	5115	Scotland_N.AG	5575	England_N_Megalithic.TW
I2935	I12439	9.3559	17.8014	2	0	0	0	0	0	0	5115	Scotland_N.AG	5600	England_N_Megalithic.AG
I2935	I20818	13.9302	13.9302	1	13.9302	1	0	0	0	0	5115	Scotland_N.AG	5545	England_N_Megalithic.TW
I2935	I30293	13.6369	21.9093	2	13.6369	1	0	0	0	0	5115	Scotland_N.AG	5575	England_N_Megalithic.TW
I2935	I30299	8.07409	8.07409	1	0	0	0	0	0	0	5115	Scotland_N.AG	5535	England_N_Megalithic_son.I30300.son.I30302.brother.I12440.TW
I2935	I30301	8.2008	8.2008	1	0	0	0	0	0	0	5115	Scotland_N.AG	5575	England_N_Megalithic.TW
I2935	I13899	9.7336	27.4017	3	0	0	0	0	0	0	5115	Scotland_N.AG	5600	England_N_Megalithic.TW
I2935	I13895	13.1241	13.1241	1	13.1241	1	0	0	0	0	5115	Scotland_N.AG	5600	England_N_Megalithic_father.I20821.son.I21390.TW
I2935	I12437	8.4455	8.4455	1	0	0	0	0	0	0	5115	Scotland_N.AG	5600	England_N_Megalithic_father.I13888.father.I21393.father.I21389.father.I30304.son.I30334.son.I30300.AG
I2935	I21388	8.7738	8.7738	1	0	0	0	0	0	0	5115	Scotland_N.AG	5657	England_N_Megalithic_son.I30300.son.I21390.TW
I2935	I21389	8.68881	8.68881	1	0	0	0	0	0	0	5115	Scotland_N.AG	5585	England_N_Megalithic.TW
I2935	NEO624	16.3065	16.3065	1	16.3065	1	16.3065	1	0	0	5115	Scotland_N.AG	4903	Great_Britain_Orkney_N.SG
I2935	NEO625	30.3481	70.7082	4	48.0795	2	48.0795	2	30.3481	1	5115	Scotland_N.AG	5138	Great_Britain_Orkney_N_father.NEO624.SG
I2935	FRA027	8.3191	8.3191	1	0	0	0	0	0	0	5115	Scotland_N.AG	4919	Sweden_Fralsegarden_N.SG
I2935	KH150613_KH180043	8.9741	8.9741	1	0	0	0	0	0	0	5115	Scotland_N.AG	5250	Germany_Niedertiefenbach
I2935	KH180131	8.02959	8.02959	1	0	0	0	0	0	0	5115	Scotland_N.AG	5080	Germany_Altendorf
I2935	KH180075	10.4355	10.4355	1	0	0	0	0	0	0	5115	Scotland_N.AG	5150	Germany_Warburg
I2935	KH200229	9.0847	9.0847	1	0	0	0	0	0	0	5115	Scotland_N.AG	5150	Germany_Warburg
I2977	I2978	8.7035	8.7035	1	0	0	0	0	0	0	4843	Scotland_N.AG	5140	Scotland_N.AG
I2977	I2979	10.9835	10.9835	1	0	0	0	0	0	0	4843	Scotland_N.AG	5104	Scotland_N.AG
I2977	I2980	8.4294	8.4294	1	0	0	0	0	0	0	4843	Scotland_N.AG	5173	Scotland_N.AG
I2977	I3134	10.1966	10.1966	1	0	0	0	0	0	0	4843	Scotland_N.AG	5461	Scotland_N.AG
I2977	I2636	9.68419	9.68419	1	0	0	0	0	0	0	4843	Scotland_N.AG	5397	Scotland_N.AG
I2977	I6759	10.9612	10.9612	1	0	0	0	0	0	0	4843	Scotland_N.AG	5527	England_N.AG
I2977	I7554	9.0209	9.0209	1	0	0	0	0	0	0	4843	Scotland_N.AG	5182	Scotland_N.AG
I2977	I6755	9.1294	9.1294	1	0	0	0	0	0	0	4843	Scotland_N.AG	5528	England_N.AG
I2977	ANN1	8.0654	8.0654	1	0	0	0	0	0	0	4843	Scotland_N.AG	5405	Ireland_MN.SG
I2977	ARD2	8.8749	8.8749	1	0	0	0	0	0	0	4843	Scotland_N.AG	5401	Ireland_MN.SG
I2977	CAK532	13.9224	13.9224	1	13.9224	1	0	0	0	0	4843	Scotland_N.AG	4892	Ireland_LN.SG
I2977	GNM1076	9.9316	9.9316	1	0	0	0	0	0	0	4843	Scotland_N.AG	5135	Ireland_MN.SG
I2977	PB1794	8.249	16.4869	2	0	0	0	0	0	0	4843	Scotland_N.AG	5486	Ireland_MN.SG
I2977	PB357	8.3607	8.3607	1	0	0	0	0	0	0	4843	Scotland_N.AG	5545	Ireland_EN_MN.SG
I2977	PB675	8.8805	8.8805	1	0	0	0	0	0	0	4843	Scotland_N.AG	5171	Ireland_MN.SG
I2977	PB768	12.4255	12.4255	1	12.4255	1	0	0	0	0	4843	Scotland_N.AG	5475	Ireland_MN.SG
I2977	PN03	9.8392	9.8392	1	0	0	0	0	0	0	4843	Scotland_N.AG	5460	Ireland_MN.SG
I2977	PN04	11.2333	11.2333	1	0	0	0	0	0	0	4843	Scotland_N.AG	5742	Ireland_EN.SG
I2977	PN05	8.7441	8.7441	1	0	0	0	0	0	0	4843	Scotland_N.AG	5729	Ireland_EN.SG
I2977	PN13	9.42321	9.42321	1	0	0	0	0	0	0	4843	Scotland_N.AG	5572	Ireland_EN_MN.SG
I2977	PN16	9.4484	9.4484	1	0	0	0	0	0	0	4843	Scotland_N.AG	5442	Ireland_MN.SG
I2977	SUC005	8.0547	8.0547	1	0	0	0	0	0	0	4843	Scotland_N.AG	4146	Italy_Sardinia_EBA.AG
I2977	I13889	12.2269	12.2269	1	12.2269	1	0	0	0	0	4843	Scotland_N.AG	5624	England_N_Megalithic.AG
I2977	I13892	10.6328	18.7839	2	0	0	0	0	0	0	4843	Scotland_N.AG	5677	England_N_Megalithic.AG
I2977	I15941	8.49071	8.49071	1	0	0	0	0	0	0	4843	Scotland_N.AG	4196	Italy_Sardinia_N.AG
I2977	I12439	10.8632	10.8632	1	0	0	0	0	0	0	4843	Scotland_N.AG	5600	England_N_Megalithic.AG
I2977	I13898	13.2868	13.2868	1	13.2868	1	0	0	0	0	4843	Scotland_N.AG	5569	England_N_Megalithic_son.I30334.TW
I2977	NEO624	17.1873	17.1873	1	17.1873	1	17.1873	1	0	0	4843	Scotland_N.AG	4903	Great_Britain_Orkney_N.SG
I2977	NEO625	8.2858	8.2858	1	0	0	0	0	0	0	4843	Scotland_N.AG	5138	Great_Britain_Orkney_N_father.NEO624.SG
I2977	KH180059	8.3661	8.3661	1	0	0	0	0	0	0	4843	Scotland_N.AG	5084	Germany_Altendorf
I2977	KH210854	8.66209	8.66209	1	0	0	0	0	0	0	4843	Scotland_N.AG	5225	Germany_Sorsum
I2978	I2979	18.571	65.1828	6	18.571	1	18.571	1	0	0	5140	Scotland_N.AG	5104	Scotland_N.AG
I2978	I2980	8.43099	16.5068	2	0	0	0	0	0	0	5140	Scotland_N.AG	5173	Scotland_N.AG
I2978	I2988	10.6155	10.6155	1	0	0	0	0	0	0	5140	Scotland_N.AG	5398	Scotland_N.AG
I2978	I3041	8.1365	8.1365	1	0	0	0	0	0	0	5140	Scotland_N.AG	5440	Scotland_N_lowEEF.AG
I2978	I3085	11.5745	39.805	4	0	0	0	0	0	0	5140	Scotland_N.AG	5149	Scotland_N.AG
I2978	I2636	13.1745	33.777	3	13.1745	1	0	0	0	0	5140	Scotland_N.AG	5397	Scotland_N.AG
I2978	I6753	9.6687	9.6687	1	0	0	0	0	0	0	5140	Scotland_N.AG	5305	England_N.AG
I2978	I6759	10.5906	29.9733	3	0	0	0	0	0	0	5140	Scotland_N.AG	5527	England_N.AG
I2978	I6760	8.293	8.293	1	0	0	0	0	0	0	5140	Scotland_N.AG	5781	England_N.AG
I2978	I6761	8.10781	8.10781	1	0	0	0	0	0	0	5140	Scotland_N.AG	5525	England_N.AG
I2978	I7554	12.2148	29.9361	3	12.2148	1	0	0	0	0	5140	Scotland_N.AG	5182	Scotland_N.AG
I2978	ANN1	8.0372	8.0372	1	0	0	0	0	0	0	5140	Scotland_N.AG	5405	Ireland_MN.SG
I2978	ASH3	9.4786	9.4786	1	0	0	0	0	0	0	5140	Scotland_N.AG	5609	Ireland_EN_MN.SG
I2978	BG72	9.8917	9.8917	1	0	0	0	0	0	0	5140	Scotland_N.AG	5467	Ireland_MN.SG
I2978	PB186	14.4067	14.4067	1	14.4067	1	0	0	0	0	5140	Scotland_N.AG	5393	Ireland_MN.SG
I2978	PB2031	9.0322	9.0322	1	0	0	0	0	0	0	5140	Scotland_N.AG	5431	Ireland_MN.SG
I2978	PN02	8.1869	8.1869	1	0	0	0	0	0	0	5140	Scotland_N.AG	5546	Ireland_EN_MN.SG
I2978	PN04	9.82461	9.82461	1	0	0	0	0	0	0	5140	Scotland_N.AG	5742	Ireland_EN.SG
I2978	PN107	8.7579	8.7579	1	0	0	0	0	0	0	5140	Scotland_N.AG	5705	Ireland_EN.SG
I2978	PN10_PN113	8.7624	8.7624	1	0	0	0	0	0	0	5140	Scotland_N.AG	5746	Ireland_EN.SG
I2978	bal004	11.4964	21.911	2	0	0	0	0	0	0	5140	Scotland_N.AG	5186	Scotland_Megalithic.SG
I2978	611	12.4876	12.4876	1	12.4876	1	0	0	0	0	5140	Scotland_N.AG	5418	England_Trumpington_N.SG
I2978	I13889	9.26729	17.3423	2	0	0	0	0	0	0	5140	Scotland_N.AG	5624	England_N_Megalithic.AG
I2978	I12439	8.907	8.907	1	0	0	0	0	0	0	5140	Scotland_N.AG	5600	England_N_Megalithic.AG
I2978	I13896	8.9071	8.9071	1	0	0	0	0	0	0	5140	Scotland_N.AG	5486	England_N_Megalithic_sister.I21395.daughter.I30332.AG
I2978	I30334	8.5853	16.6202	2	0	0	0	0	0	0	5140	Scotland_N.AG	5575	England_N_Megalithic.TW
I2978	I13890	10.4599	10.4599	1	0	0	0	0	0	0	5140	Scotland_N.AG	5600	England_N_Megalithic.TW
I2978	I13898	8.1509	8.1509	1	0	0	0	0	0	0	5140	Scotland_N.AG	5569	England_N_Megalithic_son.I30334.TW
I2978	I20821	9.99	18.8487	2	0	0	0	0	0	0	5140	Scotland_N.AG	5486	England_N_Megalithic.TW
I2978	I12437	8.137	8.137	1	0	0	0	0	0	0	5140	Scotland_N.AG	5600	England_N_Megalithic_father.I13888.father.I21393.father.I21389.father.I30304.son.I30334.son.I30300.AG
I2978	I21389	8.5633	8.5633	1	0	0	0	0	0	0	5140	Scotland_N.AG	5585	England_N_Megalithic.TW
I2978	I21393	8.6764	8.6764	1	0	0	0	0	0	0	5140	Scotland_N.AG	5600	England_N_Megalithic.TW
I2978	NEO624	49.2197	305.56	13	273.862	10	248.096	8	194.596	5	5140	Scotland_N.AG	4903	Great_Britain_Orkney_N.SG
I2978	NEO625	62.5338	345.093	15	316.871	12	272.42	9	182.388	4	5140	Scotland_N.AG	5138	Great_Britain_Orkney_N_father.NEO624.SG
I2978	KH150626	8.1398	8.1398	1	0	0	0	0	0	0	5140	Scotland_N.AG	5250	Germany_Niedertiefenbach
I2978	KH210929	8.34141	8.34141	1	0	0	0	0	0	0	5140	Scotland_N.AG	5225	Germany_Sorsum
I2978	KH210954	8.24139	8.24139	1	0	0	0	0	0	0	5140	Scotland_N.AG	5225	Germany_Sorsum
I2978	KH210992	9.9872	9.9872	1	0	0	0	0	0	0	5140	Scotland_N.AG	5000	Germany_Zuschen
I2979	I2980	12.2968	12.2968	1	12.2968	1	0	0	0	0	5104	Scotland_N.AG	5173	Scotland_N.AG
I2979	I3005	13.0936	13.0936	1	13.0936	1	0	0	0	0	5104	Scotland_N.AG	5657	England_N.AG
I2979	I3041	9.94	18.035	2	0	0	0	0	0	0	5104	Scotland_N.AG	5440	Scotland_N_lowEEF.AG
I2979	I3085	11.8104	40.5751	4	0	0	0	0	0	0	5104	Scotland_N.AG	5149	Scotland_N.AG
I2979	I5366	8.8389	8.8389	1	0	0	0	0	0	0	5104	Scotland_N.AG	5516	England_N.AG
I2979	I1563	16.2974	16.2974	1	16.2974	1	16.2974	1	0	0	5104	Scotland_N.AG	5448	Germany_Blatterhohle_MN.AG
I2979	I2636	24.0966	68.8937	4	57.8103	3	45.0053	2	45.0053	2	5104	Scotland_N.AG	5397	Scotland_N.AG
I2979	I6753	14.0674	14.0674	1	14.0674	1	0	0	0	0	5104	Scotland_N.AG	5305	England_N.AG
I2979	I6757	11.2456	11.2456	1	0	0	0	0	0	0	5104	Scotland_N.AG	5493	England_N.AG
I2979	I6759	9.0989	9.0989	1	0	0	0	0	0	0	5104	Scotland_N.AG	5527	England_N.AG
I2979	I6775	11.7269	11.7269	1	0	0	0	0	0	0	5104	Scotland_N.AG	4150	England_BellBeaker.AG
I2979	I7194	9.8412	9.8412	1	0	0	0	0	0	0	5104	Scotland_N.AG	5527	Czechia_C_Baalberge.AG
I2979	I7554	8.3959	8.3959	1	0	0	0	0	0	0	5104	Scotland_N.AG	5182	Scotland_N.AG
I2979	KOB002	8.0354	8.0354	1	0	0	0	0	0	0	5104	Scotland_N.AG	5630	Czechia_N_TRB.AG
I2979	VLI010	8.3267	8.3267	1	0	0	0	0	0	0	5104	Scotland_N.AG	4483	Czechia_EBA_CordedWare.AG
I2979	CAK531	11.6744	11.6744	1	0	0	0	0	0	0	5104	Scotland_N.AG	4701	Ireland_LN.SG
I2979	PB1327	10.0542	10.0542	1	0	0	0	0	0	0	5104	Scotland_N.AG	5407	Ireland_MN.SG
I2979	PB1794	10.9706	10.9706	1	0	0	0	0	0	0	5104	Scotland_N.AG	5486	Ireland_MN.SG
I2979	PB2031	9.2109	9.2109	1	0	0	0	0	0	0	5104	Scotland_N.AG	5431	Ireland_MN.SG
I2979	PN05	11.447	22.6438	2	0	0	0	0	0	0	5104	Scotland_N.AG	5729	Ireland_EN.SG
I2979	PN06	11.2845	11.2845	1	0	0	0	0	0	0	5104	Scotland_N.AG	5459	Ireland_MN.SG
I2979	PN07	9.2541	9.2541	1	0	0	0	0	0	0	5104	Scotland_N.AG	5410	Ireland_MN.SG
I2979	PN10_PN113	9.8885	9.8885	1	0	0	0	0	0	0	5104	Scotland_N.AG	5746	Ireland_EN.SG
I2979	PN12	10.3745	10.3745	1	0	0	0	0	0	0	5104	Scotland_N.AG	5383	Ireland_MN.SG
I2979	PN13	10.3561	18.7886	2	0	0	0	0	0	0	5104	Scotland_N.AG	5572	Ireland_EN_MN.SG
I2979	PN16	10.7697	10.7697	1	0	0	0	0	0	0	5104	Scotland_N.AG	5442	Ireland_MN.SG
I2979	bal004	10.8064	21.191	2	0	0	0	0	0	0	5104	Scotland_N.AG	5186	Scotland_Megalithic.SG
I2979	ROUQFF	8.1535	8.1535	1	0	0	0	0	0	0	5104	Scotland_N.AG	5166	France_LaClape_LN_EMBA.SG
I2979	I14167	11.9072	11.9072	1	0	0	0	0	0	0	5104	Scotland_N.AG	5850	Czechia_C_Baalberge.AG
I2979	I21390	8.9948	8.9948	1	0	0	0	0	0	0	5104	Scotland_N.AG	5630	England_N_Megalithic.AG
I2979	I30300	8.8732	8.8732	1	0	0	0	0	0	0	5104	Scotland_N.AG	5575	England_N_Megalithic.TW
I2979	I13893	9.24439	18.4293	2	0	0	0	0	0	0	5104	Scotland_N.AG	5517	England_N_Megalithic.AG
I2979	I20818	8.0953	8.0953	1	0	0	0	0	0	0	5104	Scotland_N.AG	5545	England_N_Megalithic.TW
I2979	I30293	11.728	11.728	1	0	0	0	0	0	0	5104	Scotland_N.AG	5575	England_N_Megalithic.TW
I2979	I13897	8.6907	8.6907	1	0	0	0	0	0	0	5104	Scotland_N.AG	5600	England_N_Megalithic_lc.TW
I2979	I13899	9.3559	26.1197	3	0	0	0	0	0	0	5104	Scotland_N.AG	5600	England_N_Megalithic.TW
I2979	I20821	8.9407	17.2475	2	0	0	0	0	0	0	5104	Scotland_N.AG	5486	England_N_Megalithic.TW
I2979	I21388	8.7899	8.7899	1	0	0	0	0	0	0	5104	Scotland_N.AG	5657	England_N_Megalithic_son.I30300.son.I21390.TW
I2979	NEO624	18.3743	62.8903	5	44.716	3	18.3743	1	0	0	5104	Scotland_N.AG	4903	Great_Britain_Orkney_N.SG
I2979	NEO625	18.3743	44.4315	4	18.3743	1	18.3743	1	0	0	5104	Scotland_N.AG	5138	Great_Britain_Orkney_N_father.NEO624.SG
I2979	NEO23	8.167	8.167	1	0	0	0	0	0	0	5104	Scotland_N.AG	5492	Denmark_Zealand_EN.SG
I2979	FRA004	9.4804	9.4804	1	0	0	0	0	0	0	5104	Scotland_N.AG	5144	Sweden_Fralsegarden_N.SG
I2979	FRA005	9.0273	9.0273	1	0	0	0	0	0	0	5104	Scotland_N.AG	4958	Sweden_Fralsegarden_N.SG
I2979	FRA013	9.5614	9.5614	1	0	0	0	0	0	0	5104	Scotland_N.AG	4966	Sweden_Fralsegarden_N.SG
I2979	FRA021	8.38621	8.38621	1	0	0	0	0	0	0	5104	Scotland_N.AG	5046	Sweden_Fralsegarden_N.SG
I2979	LAN006	8.12719	8.12719	1	0	0	0	0	0	0	5104	Scotland_N.AG	4928	Sweden_Landbogarden_N.SG
I2979	KH150195_KH150196_KH150616	9.7312	9.7312	1	0	0	0	0	0	0	5104	Scotland_N.AG	5250	Germany_Niedertiefenbach
I2979	KH170066	9.4307	9.4307	1	0	0	0	0	0	0	5104	Scotland_N.AG	5225	Germany_Sorsum
I2979	KH210849_KH220441	8.1546	8.1546	1	0	0	0	0	0	0	5104	Scotland_N.AG	5225	Germany_Sorsum
I2979	KH210852	8.5793	8.5793	1	0	0	0	0	0	0	5104	Scotland_N.AG	5225	Germany_Sorsum
I2979	KH210856	10.5411	10.5411	1	0	0	0	0	0	0	5104	Scotland_N.AG	5225	Germany_Sorsum
I2979	KH210896_KH220421	8.8774	8.8774	1	0	0	0	0	0	0	5104	Scotland_N.AG	5225	Germany_Sorsum
I2979	KH210931	9.2618	9.2618	1	0	0	0	0	0	0	5104	Scotland_N.AG	5225	Germany_Sorsum
I2979	KH180089	9.0988	9.0988	1	0	0	0	0	0	0	5104	Scotland_N.AG	5150	Germany_Warburg
I2979	KH210992	11.5923	11.5923	1	0	0	0	0	0	0	5104	Scotland_N.AG	5000	Germany_Zuschen
I2980	I3085	10.3823	19.1501	2	0	0	0	0	0	0	5173	Scotland_N.AG	5149	Scotland_N.AG
I2980	I3134	8.47319	8.47319	1	0	0	0	0	0	0	5173	Scotland_N.AG	5461	Scotland_N.AG
I2980	I3135	10.7478	10.7478	1	0	0	0	0	0	0	5173	Scotland_N.AG	5517	Scotland_N_lowEEF.AG
I2980	I3136	8.121	8.121	1	0	0	0	0	0	0	5173	Scotland_N.AG	5397	Scotland_N.AG
I2980	I5359	8.2634	8.2634	1	0	0	0	0	0	0	5173	Scotland_N.AG	5600	Wales_N.AG
I2980	I5366	9.1677	17.1857	2	0	0	0	0	0	0	5173	Scotland_N.AG	5516	England_N.AG
I2980	I0408	8.7686	8.7686	1	0	0	0	0	0	0	5173	Scotland_N.AG	5686	Spain_MLN.AG
I2980	I2636	19.5176	80.864	7	34.7541	2	19.5176	1	0	0	5173	Scotland_N.AG	5397	Scotland_N.AG
I2980	I6751	8.5531	8.5531	1	0	0	0	0	0	0	5173	Scotland_N.AG	5650	England_N.AG
I2980	I6753	8.1378	8.1378	1	0	0	0	0	0	0	5173	Scotland_N.AG	5305	England_N.AG
I2980	I7554	17.2198	48.3404	4	31.4476	2	17.2198	1	0	0	5173	Scotland_N.AG	5182	Scotland_N.AG
I2980	HOL001	14.7483	14.7483	1	14.7483	1	0	0	0	0	5173	Scotland_N.AG	5613	Czechia_N_TRB.AG
I2980	PB1794	9.07359	9.07359	1	0	0	0	0	0	0	5173	Scotland_N.AG	5486	Ireland_MN.SG
I2980	PB186	9.1097	9.1097	1	0	0	0	0	0	0	5173	Scotland_N.AG	5393	Ireland_MN.SG
I2980	PB357	8.52929	8.52929	1	0	0	0	0	0	0	5173	Scotland_N.AG	5545	Ireland_EN_MN.SG
I2980	PB443	8.41839	8.41839	1	0	0	0	0	0	0	5173	Scotland_N.AG	5474	Ireland_MN.SG
I2980	PB768	9.29099	9.29099	1	0	0	0	0	0	0	5173	Scotland_N.AG	5475	Ireland_MN.SG
I2980	PN02	13.1615	13.1615	1	13.1615	1	0	0	0	0	5173	Scotland_N.AG	5546	Ireland_EN_MN.SG
I2980	PN04	8.6053	8.6053	1	0	0	0	0	0	0	5173	Scotland_N.AG	5742	Ireland_EN.SG
I2980	PN06	11.9702	11.9702	1	0	0	0	0	0	0	5173	Scotland_N.AG	5459	Ireland_MN.SG
I2980	PN107	16.7993	16.7993	1	16.7993	1	16.7993	1	0	0	5173	Scotland_N.AG	5705	Ireland_EN.SG
I2980	PN10_PN113	15.2789	15.2789	1	15.2789	1	0	0	0	0	5173	Scotland_N.AG	5746	Ireland_EN.SG
I2980	bal004	8.2155	8.2155	1	0	0	0	0	0	0	5173	Scotland_N.AG	5186	Scotland_Megalithic.SG
I2980	611	11.7994	11.7994	1	0	0	0	0	0	0	5173	Scotland_N.AG	5418	England_Trumpington_N.SG
I2980	613	11.609	11.609	1	0	0	0	0	0	0	5173	Scotland_N.AG	5639	England_Trumpington_N_brother.TRPTN_611.SG
I2980	I21390	8.6513	8.6513	1	0	0	0	0	0	0	5173	Scotland_N.AG	5630	England_N_Megalithic.AG
I2980	I30300	9.9462	9.9462	1	0	0	0	0	0	0	5173	Scotland_N.AG	5575	England_N_Megalithic.TW
I2980	I13896	8.8103	8.8103	1	0	0	0	0	0	0	5173	Scotland_N.AG	5486	England_N_Megalithic_sister.I21395.daughter.I30332.AG
I2980	I30299	8.3256	8.3256	1	0	0	0	0	0	0	5173	Scotland_N.AG	5535	England_N_Megalithic_son.I30300.son.I30302.brother.I12440.TW
I2980	I13895	9.9754	9.9754	1	0	0	0	0	0	0	5173	Scotland_N.AG	5600	England_N_Megalithic_father.I20821.son.I21390.TW
I2980	I21385	9.62771	9.62771	1	0	0	0	0	0	0	5173	Scotland_N.AG	5680	England_N_Megalithic.TW
I2980	I21388	9.5119	9.5119	1	0	0	0	0	0	0	5173	Scotland_N.AG	5657	England_N_Megalithic_son.I30300.son.I21390.TW
I2980	NEO624	13.5176	33.2928	3	13.5176	1	0	0	0	0	5173	Scotland_N.AG	4903	Great_Britain_Orkney_N.SG
I2980	NEO625	15.3494	28.0906	2	28.0906	2	0	0	0	0	5173	Scotland_N.AG	5138	Great_Britain_Orkney_N_father.NEO624.SG
I2980	KH150637	8.9177	8.9177	1	0	0	0	0	0	0	5173	Scotland_N.AG	5250	Germany_Niedertiefenbach
I2980	KH170066	9.2738	9.2738	1	0	0	0	0	0	0	5173	Scotland_N.AG	5225	Germany_Sorsum
I2980	KH210856	8.3868	8.3868	1	0	0	0	0	0	0	5173	Scotland_N.AG	5225	Germany_Sorsum
I2980	KH210957	8.1444	8.1444	1	0	0	0	0	0	0	5173	Scotland_N.AG	5225	Germany_Sorsum
I2988	I3133	10.3477	10.3477	1	0	0	0	0	0	0	5398	Scotland_N.AG	5446	Scotland_N.AG
I2988	I3134	18.8106	18.8106	1	18.8106	1	18.8106	1	0	0	5398	Scotland_N.AG	5461	Scotland_N.AG
I2988	I3135	13.4229	13.4229	1	13.4229	1	0	0	0	0	5398	Scotland_N.AG	5517	Scotland_N_lowEEF.AG
I2988	I6747	11.4013	29.9893	3	0	0	0	0	0	0	5398	Scotland_N.AG	5528	England_N.AG
I2988	I6759	8.1385	8.1385	1	0	0	0	0	0	0	5398	Scotland_N.AG	5527	England_N.AG
I2988	I6760	9.5018	9.5018	1	0	0	0	0	0	0	5398	Scotland_N.AG	5781	England_N.AG
I2988	I7186	8.7502	8.7502	1	0	0	0	0	0	0	5398	Scotland_N.AG	5713	Czechia_C_Baalberge.AG
I2988	ANN1	13.4687	13.4687	1	13.4687	1	0	0	0	0	5398	Scotland_N.AG	5405	Ireland_MN.SG
I2988	BG72	9.3896	9.3896	1	0	0	0	0	0	0	5398	Scotland_N.AG	5467	Ireland_MN.SG
I2988	CAK530	10.9695	10.9695	1	0	0	0	0	0	0	5398	Scotland_N.AG	4711	Ireland_LN.SG
I2988	CH448	9.141	9.141	1	0	0	0	0	0	0	5398	Scotland_N.AG	5517	Ireland_MN.SG
I2988	GNM1007	9.4221	17.8564	2	0	0	0	0	0	0	5398	Scotland_N.AG	5288	Ireland_MN.SG
I2988	GNM1076	8.49429	8.49429	1	0	0	0	0	0	0	5398	Scotland_N.AG	5135	Ireland_MN.SG
I2988	NG10	12.5367	12.5367	1	12.5367	1	0	0	0	0	5398	Scotland_N.AG	5151	Ireland_MN.SG
I2988	NGZ1	11.1683	19.6637	2	0	0	0	0	0	0	5398	Scotland_N.AG	5024	Ireland_MN.SG
I2988	PB186	8.59071	8.59071	1	0	0	0	0	0	0	5398	Scotland_N.AG	5393	Ireland_MN.SG
I2988	PB2031	8.1671	8.1671	1	0	0	0	0	0	0	5398	Scotland_N.AG	5431	Ireland_MN.SG
I2988	PB581	9.5393	9.5393	1	0	0	0	0	0	0	5398	Scotland_N.AG	5413	Ireland_MN.SG
I2988	PB672	13.0538	13.0538	1	13.0538	1	0	0	0	0	5398	Scotland_N.AG	5442	Ireland_MN.SG
I2988	PB675	10.9071	10.9071	1	0	0	0	0	0	0	5398	Scotland_N.AG	5171	Ireland_MN.SG
I2988	PN03	8.0826	8.0826	1	0	0	0	0	0	0	5398	Scotland_N.AG	5460	Ireland_MN.SG
I2988	PN04	16.1715	16.1715	1	16.1715	1	16.1715	1	0	0	5398	Scotland_N.AG	5742	Ireland_EN.SG
I2988	PN05	8.0687	8.0687	1	0	0	0	0	0	0	5398	Scotland_N.AG	5729	Ireland_EN.SG
I2988	PN06	17.9419	27.1788	2	17.9419	1	17.9419	1	0	0	5398	Scotland_N.AG	5459	Ireland_MN.SG
I2988	PN07	8.04449	8.04449	1	0	0	0	0	0	0	5398	Scotland_N.AG	5410	Ireland_MN.SG
I2988	PN107	12.6323	23.5011	2	12.6323	1	0	0	0	0	5398	Scotland_N.AG	5705	Ireland_EN.SG
I2988	PN13	11.9138	11.9138	1	0	0	0	0	0	0	5398	Scotland_N.AG	5572	Ireland_EN_MN.SG
I2988	I11600	8.1106	8.1106	1	0	0	0	0	0	0	5398	Scotland_N.AG	5050	Portugal_C.SG
I2988	611	15.4436	24.7093	2	15.4436	1	0	0	0	0	5398	Scotland_N.AG	5418	England_Trumpington_N.SG
I2988	I13889	17.332	17.332	1	17.332	1	17.332	1	0	0	5398	Scotland_N.AG	5624	England_N_Megalithic.AG
I2988	I15030	8.409	8.409	1	0	0	0	0	0	0	5398	Scotland_N.AG	5700	France_N.AG
I2988	I16121	12.1773	12.1773	1	12.1773	1	0	0	0	0	5398	Scotland_N.AG	5850	Czechia_C_Baalberge.AG
I2988	I21390	12.9561	34.6603	3	25.5059	2	0	0	0	0	5398	Scotland_N.AG	5630	England_N_Megalithic.AG
I2988	I30300	8.0903	8.0903	1	0	0	0	0	0	0	5398	Scotland_N.AG	5575	England_N_Megalithic.TW
I2988	I12439	10.4065	19.1713	2	0	0	0	0	0	0	5398	Scotland_N.AG	5600	England_N_Megalithic.AG
I2988	I20818	9.1734	9.1734	1	0	0	0	0	0	0	5398	Scotland_N.AG	5545	England_N_Megalithic.TW
I2988	I13890	11.6458	22.334	2	0	0	0	0	0	0	5398	Scotland_N.AG	5600	England_N_Megalithic.TW
I2988	I13899	11.0205	11.0205	1	0	0	0	0	0	0	5398	Scotland_N.AG	5600	England_N_Megalithic.TW
I2988	I20821	12.0984	12.0984	1	12.0984	1	0	0	0	0	5398	Scotland_N.AG	5486	England_N_Megalithic.TW
I2988	I13895	13.1914	25.7051	2	25.7051	2	0	0	0	0	5398	Scotland_N.AG	5600	England_N_Megalithic_father.I20821.son.I21390.TW
I2988	I12437	8.3398	8.3398	1	0	0	0	0	0	0	5398	Scotland_N.AG	5600	England_N_Megalithic_father.I13888.father.I21393.father.I21389.father.I30304.son.I30334.son.I30300.AG
I2988	I21388	9.14261	9.14261	1	0	0	0	0	0	0	5398	Scotland_N.AG	5657	England_N_Megalithic_son.I30300.son.I21390.TW
I2988	I21389	8.9884	17.3273	2	0	0	0	0	0	0	5398	Scotland_N.AG	5585	England_N_Megalithic.TW
I2988	I21393	8.0557	16.0735	2	0	0	0	0	0	0	5398	Scotland_N.AG	5600	England_N_Megalithic.TW
I2988	NEO847	14.2757	14.2757	1	14.2757	1	0	0	0	0	5398	Scotland_N.AG	5416	Great_Britain_Gloucestershire_N.SG
I2988	KH150619	8.74339	8.74339	1	0	0	0	0	0	0	5398	Scotland_N.AG	5250	Germany_Niedertiefenbach
I2988	KH180121	10.6572	10.6572	1	0	0	0	0	0	0	5398	Scotland_N.AG	5150	Germany_Warburg
I2988	KH210931	8.0188	8.0188	1	0	0	0	0	0	0	5398	Scotland_N.AG	5225	Germany_Sorsum
I3005	I3133	13.9858	32.1752	3	13.9858	1	0	0	0	0	5657	England_N.AG	5446	Scotland_N.AG
I3005	I3134	9.50501	18.3616	2	0	0	0	0	0	0	5657	England_N.AG	5461	Scotland_N.AG
I3005	I3136	13.9638	13.9638	1	13.9638	1	0	0	0	0	5657	England_N.AG	5397	Scotland_N.AG
I3005	I3138	8.449	16.8487	2	0	0	0	0	0	0	5657	England_N.AG	4998	Scotland_N.AG
I3005	I5359	8.4112	8.4112	1	0	0	0	0	0	0	5657	England_N.AG	5600	Wales_N.AG
I3005	I5366	10.2053	10.2053	1	0	0	0	0	0	0	5657	England_N.AG	5516	England_N.AG
I3005	I2636	9.4494	9.4494	1	0	0	0	0	0	0	5657	England_N.AG	5397	Scotland_N.AG
I3005	I6753	9.4311	9.4311	1	0	0	0	0	0	0	5657	England_N.AG	5305	England_N.AG
I3005	I6759	9.2599	25.7615	3	0	0	0	0	0	0	5657	England_N.AG	5527	England_N.AG
I3005	HOL002	8.0403	8.0403	1	0	0	0	0	0	0	5657	England_N.AG	5140	Czechia_N_Baden.AG
I3005	ANN1	8.1339	8.1339	1	0	0	0	0	0	0	5657	England_N.AG	5405	Ireland_MN.SG
I3005	CAK531	10.8071	29.9097	3	0	0	0	0	0	0	5657	England_N.AG	4701	Ireland_LN.SG
I3005	CAK532	11.0307	11.0307	1	0	0	0	0	0	0	5657	England_N.AG	4892	Ireland_LN.SG
I3005	GNM1007	10.218	10.218	1	0	0	0	0	0	0	5657	England_N.AG	5288	Ireland_MN.SG
I3005	MB6	8.52981	8.52981	1	0	0	0	0	0	0	5657	England_N.AG	5192	Ireland_MN.SG
I3005	PB1327	10.3442	10.3442	1	0	0	0	0	0	0	5657	England_N.AG	5407	Ireland_MN.SG
I3005	PB1794	10.8924	19.2586	2	0	0	0	0	0	0	5657	England_N.AG	5486	Ireland_MN.SG
I3005	PB186	10.2636	19.2805	2	0	0	0	0	0	0	5657	England_N.AG	5393	Ireland_MN.SG
I3005	PB443	12.3913	12.3913	1	12.3913	1	0	0	0	0	5657	England_N.AG	5474	Ireland_MN.SG
I3005	PB672	9.7991	19.3457	2	0	0	0	0	0	0	5657	England_N.AG	5442	Ireland_MN.SG
I3005	PN02	9.7379	9.7379	1	0	0	0	0	0	0	5657	England_N.AG	5546	Ireland_EN_MN.SG
I3005	PN07	13.4714	22.1744	2	13.4714	1	0	0	0	0	5657	England_N.AG	5410	Ireland_MN.SG
I3005	PN107	16.3584	33.4814	3	16.3584	1	16.3584	1	0	0	5657	England_N.AG	5705	Ireland_EN.SG
I3005	PN10_PN113	8.5554	8.5554	1	0	0	0	0	0	0	5657	England_N.AG	5746	Ireland_EN.SG
I3005	PN12	9.8877	9.8877	1	0	0	0	0	0	0	5657	England_N.AG	5383	Ireland_MN.SG
I3005	PN13	9.1887	9.1887	1	0	0	0	0	0	0	5657	England_N.AG	5572	Ireland_EN_MN.SG
I3005	LugarCanto44	8.64069	8.64069	1	0	0	0	0	0	0	5657	England_N.AG	5950	Portugal_MN.SG
I3005	prs002	8.40061	8.40061	1	0	0	0	0	0	0	5657	England_N.AG	5665	Ireland_Megalithic.SG
I3005	prs016	10.3504	10.3504	1	0	0	0	0	0	0	5657	England_N.AG	5539	Ireland_Megalithic.SG
I3005	RISE1248	9.6127	9.6127	1	0	0	0	0	0	0	5657	England_N.AG	4725	Poland_Ksiaznice_GlobularAmphora.SG
I3005	ROUQV	10.2021	10.2021	1	0	0	0	0	0	0	5657	England_N.AG	5159	France_LaClape_LN_EMBA.SG
I3005	atp016	9.18519	9.18519	1	0	0	0	0	0	0	5657	England_N.AG	4971	Spain_C.SG
I3005	I13889	16.5345	16.5345	1	16.5345	1	16.5345	1	0	0	5657	England_N.AG	5624	England_N_Megalithic.AG
I3005	I14169	9.7591	9.7591	1	0	0	0	0	0	0	5657	England_N.AG	5850	Czechia_C_Baalberge.AG
I3005	I14676	8.447	8.447	1	0	0	0	0	0	0	5657	England_N.AG	4053	Italy_Sardinia_C_MonteClaro.AG
I3005	I16121	8.4294	8.4294	1	0	0	0	0	0	0	5657	England_N.AG	5850	Czechia_C_Baalberge.AG
I3005	I30300	15.7661	15.7661	1	15.7661	1	0	0	0	0	5657	England_N.AG	5575	England_N_Megalithic.TW
I3005	I12439	8.035	8.035	1	0	0	0	0	0	0	5657	England_N.AG	5600	England_N_Megalithic.AG
I3005	I13896	22.4687	31.3552	2	22.4687	1	22.4687	1	22.4687	1	5657	England_N.AG	5486	England_N_Megalithic_sister.I21395.daughter.I30332.AG
I3005	I20818	12.3168	12.3168	1	12.3168	1	0	0	0	0	5657	England_N.AG	5545	England_N_Megalithic.TW
I3005	I30299	11.0408	11.0408	1	0	0	0	0	0	0	5657	England_N.AG	5535	England_N_Megalithic_son.I30300.son.I30302.brother.I12440.TW
I3005	I30334	15.4381	15.4381	1	15.4381	1	0	0	0	0	5657	England_N.AG	5575	England_N_Megalithic.TW
I3005	I13890	8.8147	17.2561	2	0	0	0	0	0	0	5657	England_N.AG	5600	England_N_Megalithic.TW
I3005	I13898	11.6173	30.0733	3	0	0	0	0	0	0	5657	England_N.AG	5569	England_N_Megalithic_son.I30334.TW
I3005	I13899	19.2497	19.2497	1	19.2497	1	19.2497	1	0	0	5657	England_N.AG	5600	England_N_Megalithic.TW
I3005	I20821	8.3353	8.3353	1	0	0	0	0	0	0	5657	England_N.AG	5486	England_N_Megalithic.TW
I3005	I21389	9.8804	9.8804	1	0	0	0	0	0	0	5657	England_N.AG	5585	England_N_Megalithic.TW
I3005	NEO625	10.4449	10.4449	1	0	0	0	0	0	0	5657	England_N.AG	5138	Great_Britain_Orkney_N_father.NEO624.SG
I3005	NEO847	9.2458	9.2458	1	0	0	0	0	0	0	5657	England_N.AG	5416	Great_Britain_Gloucestershire_N.SG
I3005	NEO29	8.4816	8.4816	1	0	0	0	0	0	0	5657	England_N.AG	5521	Denmark_SouthScandinavia_EN.SG
I3005	FRA005	9.3264	9.3264	1	0	0	0	0	0	0	5657	England_N.AG	4958	Sweden_Fralsegarden_N.SG
I3005	FRA007	9.6194	9.6194	1	0	0	0	0	0	0	5657	England_N.AG	5084	Sweden_Fralsegarden_N.SG
I3005	FRA009	9.6194	9.6194	1	0	0	0	0	0	0	5657	England_N.AG	5091	Sweden_Fralsegarden_N.SG
I3005	FRA011	8.85911	8.85911	1	0	0	0	0	0	0	5657	England_N.AG	5081	Sweden_Fralsegarden_N.SG
I3005	FRA030	8.7073	8.7073	1	0	0	0	0	0	0	5657	England_N.AG	4939	Sweden_Fralsegarden_N.SG
I3005	FRA105	8.2464	8.2464	1	0	0	0	0	0	0	5657	England_N.AG	4755	Sweden_Fralsegarden_N.SG
I3005	LAN007	9.7149	9.7149	1	0	0	0	0	0	0	5657	England_N.AG	4950	Sweden_Landbogarden_N.SG
I3005	KH150618	12.7854	12.7854	1	12.7854	1	0	0	0	0	5657	England_N.AG	5250	Germany_Niedertiefenbach
I3005	KH150625	11.7652	11.7652	1	0	0	0	0	0	0	5657	England_N.AG	5250	Germany_Niedertiefenbach
I3005	KH150629	10.0616	10.0616	1	0	0	0	0	0	0	5657	England_N.AG	5250	Germany_Niedertiefenbach
I3005	KH180059	8.4574	8.4574	1	0	0	0	0	0	0	5657	England_N.AG	5084	Germany_Altendorf
I3005	KH180075	9.821	9.821	1	0	0	0	0	0	0	5657	England_N.AG	5150	Germany_Warburg
I3005	KH180120	10.7876	10.7876	1	0	0	0	0	0	0	5657	England_N.AG	5150	Germany_Warburg
I3005	KH170035_KH210851	8.5736	8.5736	1	0	0	0	0	0	0	5657	England_N.AG	5225	Germany_Sorsum
I3005	KH210852	8.9959	8.9959	1	0	0	0	0	0	0	5657	England_N.AG	5225	Germany_Sorsum
I3005	KH210896_KH220421	9.4806	9.4806	1	0	0	0	0	0	0	5657	England_N.AG	5225	Germany_Sorsum
I3005	KH210925_KH210941	9.1182	9.1182	1	0	0	0	0	0	0	5657	England_N.AG	5225	Germany_Sorsum
I3005	KH210928_KH210942	9.7514	9.7514	1	0	0	0	0	0	0	5657	England_N.AG	5225	Germany_Sorsum
I3005	KH210929	9.15819	9.15819	1	0	0	0	0	0	0	5657	England_N.AG	5225	Germany_Sorsum
I3005	KH200134_KH201258	8.9486	8.9486	1	0	0	0	0	0	0	5657	England_N.AG	5150	Germany_Warburg
I3005	KH200155	8.2279	8.2279	1	0	0	0	0	0	0	5657	England_N.AG	5150	Germany_Warburg
I3041	I3068	10.109	10.109	1	0	0	0	0	0	0	5440	Scotland_N_lowEEF.AG	5533	England_N.AG
I3041	I3133	9.741	18.1427	2	0	0	0	0	0	0	5440	Scotland_N_lowEEF.AG	5446	Scotland_N.AG
I3041	I3134	8.9542	8.9542	1	0	0	0	0	0	0	5440	Scotland_N_lowEEF.AG	5461	Scotland_N.AG
I3041	I3135	21.9711	98.6425	7	57.6291	3	43.5541	2	43.5541	2	5440	Scotland_N_lowEEF.AG	5517	Scotland_N_lowEEF.AG
I3041	I3138	22.725	53.5377	3	44.0842	2	44.0842	2	44.0842	2	5440	Scotland_N_lowEEF.AG	4998	Scotland_N.AG
I3041	I6759	8.7851	8.7851	1	0	0	0	0	0	0	5440	Scotland_N_lowEEF.AG	5527	England_N.AG
I3041	I7191	9.17342	9.17342	1	0	0	0	0	0	0	5440	Scotland_N_lowEEF.AG	5657	Czechia_C_Baalberge.AG
I3041	I6762	11.3642	11.3642	1	0	0	0	0	0	0	5440	Scotland_N_lowEEF.AG	5700	England_N.AG
I3041	ASH3	9.5265	9.5265	1	0	0	0	0	0	0	5440	Scotland_N_lowEEF.AG	5609	Ireland_EN_MN.SG
I3041	PB1327	8.6355	8.6355	1	0	0	0	0	0	0	5440	Scotland_N_lowEEF.AG	5407	Ireland_MN.SG
I3041	PB443	9.5099	9.5099	1	0	0	0	0	0	0	5440	Scotland_N_lowEEF.AG	5474	Ireland_MN.SG
I3041	PB672	8.9959	8.9959	1	0	0	0	0	0	0	5440	Scotland_N_lowEEF.AG	5442	Ireland_MN.SG
I3041	PB675	21.4431	21.4431	1	21.4431	1	21.4431	1	21.4431	1	5440	Scotland_N_lowEEF.AG	5171	Ireland_MN.SG
I3041	PN02	8.4928	8.4928	1	0	0	0	0	0	0	5440	Scotland_N_lowEEF.AG	5546	Ireland_EN_MN.SG
I3041	611	12.1448	12.1448	1	12.1448	1	0	0	0	0	5440	Scotland_N_lowEEF.AG	5418	England_Trumpington_N.SG
I3041	I13889	8.1375	8.1375	1	0	0	0	0	0	0	5440	Scotland_N_lowEEF.AG	5624	England_N_Megalithic.AG
I3041	I12439	10.4519	19.8387	2	0	0	0	0	0	0	5440	Scotland_N_lowEEF.AG	5600	England_N_Megalithic.AG
I3041	I30334	13.1999	13.1999	1	13.1999	1	0	0	0	0	5440	Scotland_N_lowEEF.AG	5575	England_N_Megalithic.TW
I3041	I13890	9.59301	9.59301	1	0	0	0	0	0	0	5440	Scotland_N_lowEEF.AG	5600	England_N_Megalithic.TW
I3041	I13898	13.7162	13.7162	1	13.7162	1	0	0	0	0	5440	Scotland_N_lowEEF.AG	5569	England_N_Megalithic_son.I30334.TW
I3041	I13899	8.9709	8.9709	1	0	0	0	0	0	0	5440	Scotland_N_lowEEF.AG	5600	England_N_Megalithic.TW
I3041	I20821	8.4935	8.4935	1	0	0	0	0	0	0	5440	Scotland_N_lowEEF.AG	5486	England_N_Megalithic.TW
I3041	I21385	11.7778	21.8087	2	0	0	0	0	0	0	5440	Scotland_N_lowEEF.AG	5680	England_N_Megalithic.TW
I3041	NEO625	11.2329	11.2329	1	0	0	0	0	0	0	5440	Scotland_N_lowEEF.AG	5138	Great_Britain_Orkney_N_father.NEO624.SG
I3041	FRA021	8.03181	8.03181	1	0	0	0	0	0	0	5440	Scotland_N_lowEEF.AG	5046	Sweden_Fralsegarden_N.SG
I3041	FRA029	8.5019	8.5019	1	0	0	0	0	0	0	5440	Scotland_N_lowEEF.AG	4955	Sweden_Fralsegarden_N.SG
I3041	FRA039	8.3295	8.3295	1	0	0	0	0	0	0	5440	Scotland_N_lowEEF.AG	4933	Sweden_Fralsegarden_N.SG
I3041	HUN002	8.4631	8.4631	1	0	0	0	0	0	0	5440	Scotland_N_lowEEF.AG	5218	Sweden_Hunnebostrand_N.SG
I3041	KH180068	8.1444	8.1444	1	0	0	0	0	0	0	5440	Scotland_N_lowEEF.AG	5150	Germany_Warburg
I3041	KH180075	8.04529	8.04529	1	0	0	0	0	0	0	5440	Scotland_N_lowEEF.AG	5150	Germany_Warburg
I3041	KH210852	8.4833	8.4833	1	0	0	0	0	0	0	5440	Scotland_N_lowEEF.AG	5225	Germany_Sorsum
I3041	KH210954	9.1802	9.1802	1	0	0	0	0	0	0	5440	Scotland_N_lowEEF.AG	5225	Germany_Sorsum
I3041	KH201292_KH201346	8.3936	8.3936	1	0	0	0	0	0	0	5440	Scotland_N_lowEEF.AG	5150	Germany_Warburg
I3041	KH210991	9.19811	9.19811	1	0	0	0	0	0	0	5440	Scotland_N_lowEEF.AG	5000	Germany_Zuschen
I3068	I3136	9.8206	9.8206	1	0	0	0	0	0	0	5533	England_N.AG	5397	Scotland_N.AG
I3068	I3138	11.2134	11.2134	1	0	0	0	0	0	0	5533	England_N.AG	4998	Scotland_N.AG
I3068	I2636	10.0127	18.7878	2	0	0	0	0	0	0	5533	England_N.AG	5397	Scotland_N.AG
I3068	I6747	8.15599	8.15599	1	0	0	0	0	0	0	5533	England_N.AG	5528	England_N.AG
I3068	I6751	8.1255	8.1255	1	0	0	0	0	0	0	5533	England_N.AG	5650	England_N.AG
I3068	I6753	21.2536	38.4599	3	21.2536	1	21.2536	1	21.2536	1	5533	England_N.AG	5305	England_N.AG
I3068	I6759	9.39	9.39	1	0	0	0	0	0	0	5533	England_N.AG	5527	England_N.AG
I3068	I7950	9.4577	9.4577	1	0	0	0	0	0	0	5533	England_N.AG	5398	Czechia_N_oWHG.AG
I3068	R29	8.356	8.356	1	0	0	0	0	0	0	5533	England_N.AG	4150	Italy_Sardinia_C_BA.SG
I3068	I6755	8.0743	8.0743	1	0	0	0	0	0	0	5533	England_N.AG	5528	England_N.AG
I3068	I6762	12.1623	12.1623	1	12.1623	1	0	0	0	0	5533	England_N.AG	5700	England_N.AG
I3068	ANN1	9.3352	9.3352	1	0	0	0	0	0	0	5533	England_N.AG	5405	Ireland_MN.SG
I3068	ASH3	11.1708	19.2021	2	0	0	0	0	0	0	5533	England_N.AG	5609	Ireland_EN_MN.SG
I3068	CAK530	9.5003	9.5003	1	0	0	0	0	0	0	5533	England_N.AG	4711	Ireland_LN.SG
I3068	CAK533	9.56789	9.56789	1	0	0	0	0	0	0	5533	England_N.AG	4926	Ireland_LN.SG
I3068	CH448	8.8394	8.8394	1	0	0	0	0	0	0	5533	England_N.AG	5517	Ireland_MN.SG
I3068	PB443	13.7202	13.7202	1	13.7202	1	0	0	0	0	5533	England_N.AG	5474	Ireland_MN.SG
I3068	PN03	9.735	9.735	1	0	0	0	0	0	0	5533	England_N.AG	5460	Ireland_MN.SG
I3068	PN05	10.5152	10.5152	1	0	0	0	0	0	0	5533	England_N.AG	5729	Ireland_EN.SG
I3068	PN107	12.8485	12.8485	1	12.8485	1	0	0	0	0	5533	England_N.AG	5705	Ireland_EN.SG
I3068	PN10_PN113	10.7582	10.7582	1	0	0	0	0	0	0	5533	England_N.AG	5746	Ireland_EN.SG
I3068	PN12	8.8444	16.9122	2	0	0	0	0	0	0	5533	England_N.AG	5383	Ireland_MN.SG
I3068	prs016	8.6577	8.6577	1	0	0	0	0	0	0	5533	England_N.AG	5539	Ireland_Megalithic.SG
I3068	1H06	8.1704	8.1704	1	0	0	0	0	0	0	5533	England_N.AG	5115	France_MontAime_MLN_daughter.2H11.SG
I3068	I13892	8.1739	8.1739	1	0	0	0	0	0	0	5533	England_N.AG	5677	England_N_Megalithic.AG
I3068	I14175	9.9352	9.9352	1	0	0	0	0	0	0	5533	England_N.AG	5526	Czechia_C_Baalberge.AG
I3068	I14326	10.0505	10.0505	1	0	0	0	0	0	0	5533	England_N.AG	4908	England_N.AG
I3068	I21390	12.0167	28.404	3	12.0167	1	0	0	0	0	5533	England_N.AG	5630	England_N_Megalithic.AG
I3068	I30300	17.9573	17.9573	1	17.9573	1	17.9573	1	0	0	5533	England_N.AG	5575	England_N_Megalithic.TW
I3068	I20818	8.7024	8.7024	1	0	0	0	0	0	0	5533	England_N.AG	5545	England_N_Megalithic.TW
I3068	I30299	9.6822	9.6822	1	0	0	0	0	0	0	5533	England_N.AG	5535	England_N_Megalithic_son.I30300.son.I30302.brother.I12440.TW
I3068	I30301	9.304	9.304	1	0	0	0	0	0	0	5533	England_N.AG	5575	England_N_Megalithic.TW
I3068	I13897	8.0544	8.0544	1	0	0	0	0	0	0	5533	England_N.AG	5600	England_N_Megalithic_lc.TW
I3068	I13898	8.11869	8.11869	1	0	0	0	0	0	0	5533	England_N.AG	5569	England_N_Megalithic_son.I30334.TW
I3068	I20821	12.8294	12.8294	1	12.8294	1	0	0	0	0	5533	England_N.AG	5486	England_N_Megalithic.TW
I3068	I13895	8.37841	16.4859	2	0	0	0	0	0	0	5533	England_N.AG	5600	England_N_Megalithic_father.I20821.son.I21390.TW
I3068	I12437	14.9322	14.9322	1	14.9322	1	0	0	0	0	5533	England_N.AG	5600	England_N_Megalithic_father.I13888.father.I21393.father.I21389.father.I30304.son.I30334.son.I30300.AG
I3068	I21388	10.1483	26.8979	3	0	0	0	0	0	0	5533	England_N.AG	5657	England_N_Megalithic_son.I30300.son.I21390.TW
I3068	I21393	15.9855	15.9855	1	15.9855	1	0	0	0	0	5533	England_N.AG	5600	England_N_Megalithic.TW
I3068	NEO624	10.4958	10.4958	1	0	0	0	0	0	0	5533	England_N.AG	4903	Great_Britain_Orkney_N.SG
I3068	FRA028	8.1797	8.1797	1	0	0	0	0	0	0	5533	England_N.AG	4955	Sweden_Fralsegarden_N.SG
I3068	HJE013	8.6013	8.6013	1	0	0	0	0	0	0	5533	England_N.AG	5075	Sweden_HjelmarsRor_N.SG
I3068	KH150625	12.0989	21.3739	2	12.0989	1	0	0	0	0	5533	England_N.AG	5250	Germany_Niedertiefenbach
I3068	KH180059	8.1679	8.1679	1	0	0	0	0	0	0	5533	England_N.AG	5084	Germany_Altendorf
I3068	KH180077	9.4959	9.4959	1	0	0	0	0	0	0	5533	England_N.AG	5150	Germany_Warburg
I3068	KH180087	8.56949	8.56949	1	0	0	0	0	0	0	5533	England_N.AG	5150	Germany_Warburg
I3068	KH210852	8.3198	8.3198	1	0	0	0	0	0	0	5533	England_N.AG	5225	Germany_Sorsum
I3068	KH210908	8.427	8.427	1	0	0	0	0	0	0	5533	England_N.AG	5225	Germany_Sorsum
I3068	KH210914	10.3286	10.3286	1	0	0	0	0	0	0	5533	England_N.AG	5225	Germany_Sorsum
I3085	I3134	8.4832	16.9567	2	0	0	0	0	0	0	5149	Scotland_N.AG	5461	Scotland_N.AG
I3085	I3136	9.1395	9.1395	1	0	0	0	0	0	0	5149	Scotland_N.AG	5397	Scotland_N.AG
I3085	I3138	8.3925	8.3925	1	0	0	0	0	0	0	5149	Scotland_N.AG	4998	Scotland_N.AG
I3085	I2636	31.5255	52.8472	3	31.5255	1	31.5255	1	31.5255	1	5149	Scotland_N.AG	5397	Scotland_N.AG
I3085	I6751	10.2169	10.2169	1	0	0	0	0	0	0	5149	Scotland_N.AG	5650	England_N.AG
I3085	I6759	11.3555	29.7894	3	0	0	0	0	0	0	5149	Scotland_N.AG	5527	England_N.AG
I3085	I6760	9.0876	9.0876	1	0	0	0	0	0	0	5149	Scotland_N.AG	5781	England_N.AG
I3085	I6766	8.8691	8.8691	1	0	0	0	0	0	0	5149	Scotland_N.AG	5100	Scotland_N.AG
I3085	I7554	13.9493	32.6524	3	13.9493	1	0	0	0	0	5149	Scotland_N.AG	5182	Scotland_N.AG
I3085	I6755	11.4679	11.4679	1	0	0	0	0	0	0	5149	Scotland_N.AG	5528	England_N.AG
I3085	ANN1	11.72	11.72	1	0	0	0	0	0	0	5149	Scotland_N.AG	5405	Ireland_MN.SG
I3085	GNM1076	8.9307	8.9307	1	0	0	0	0	0	0	5149	Scotland_N.AG	5135	Ireland_MN.SG
I3085	MB6	13.6135	13.6135	1	13.6135	1	0	0	0	0	5149	Scotland_N.AG	5192	Ireland_MN.SG
I3085	NG10	10.3283	10.3283	1	0	0	0	0	0	0	5149	Scotland_N.AG	5151	Ireland_MN.SG
I3085	PB1327	9.3524	9.3524	1	0	0	0	0	0	0	5149	Scotland_N.AG	5407	Ireland_MN.SG
I3085	PB2031	13.3136	23.6175	2	13.3136	1	0	0	0	0	5149	Scotland_N.AG	5431	Ireland_MN.SG
I3085	PB443	8.2109	8.2109	1	0	0	0	0	0	0	5149	Scotland_N.AG	5474	Ireland_MN.SG
I3085	PB672	8.47889	8.47889	1	0	0	0	0	0	0	5149	Scotland_N.AG	5442	Ireland_MN.SG
I3085	PB675	9.5971	9.5971	1	0	0	0	0	0	0	5149	Scotland_N.AG	5171	Ireland_MN.SG
I3085	PN03	9.5261	9.5261	1	0	0	0	0	0	0	5149	Scotland_N.AG	5460	Ireland_MN.SG
I3085	N18	8.09951	8.09951	1	0	0	0	0	0	0	5149	Scotland_N.AG	5459	Poland_TRB.SG
I3085	bal004	11.7804	22.5376	2	0	0	0	0	0	0	5149	Scotland_N.AG	5186	Scotland_Megalithic.SG
I3085	RISE1248	8.64661	8.64661	1	0	0	0	0	0	0	5149	Scotland_N.AG	4725	Poland_Ksiaznice_GlobularAmphora.SG
I3085	ELT002	10.9567	10.9567	1	0	0	0	0	0	0	5149	Scotland_N.AG	5753	Spain_MLN.AG
I3085	I13889	9.53261	9.53261	1	0	0	0	0	0	0	5149	Scotland_N.AG	5624	England_N_Megalithic.AG
I3085	I13892	9.7445	9.7445	1	0	0	0	0	0	0	5149	Scotland_N.AG	5677	England_N_Megalithic.AG
I3085	I30300	9.801	9.801	1	0	0	0	0	0	0	5149	Scotland_N.AG	5575	England_N_Megalithic.TW
I3085	I13893	9.9646	9.9646	1	0	0	0	0	0	0	5149	Scotland_N.AG	5517	England_N_Megalithic.AG
I3085	I13896	8.18419	8.18419	1	0	0	0	0	0	0	5149	Scotland_N.AG	5486	England_N_Megalithic_sister.I21395.daughter.I30332.AG
I3085	I20818	8.24349	8.24349	1	0	0	0	0	0	0	5149	Scotland_N.AG	5545	England_N_Megalithic.TW
I3085	I13890	9.5236	9.5236	1	0	0	0	0	0	0	5149	Scotland_N.AG	5600	England_N_Megalithic.TW
I3085	I13897	9.1752	9.1752	1	0	0	0	0	0	0	5149	Scotland_N.AG	5600	England_N_Megalithic_lc.TW
I3085	I13898	8.3544	8.3544	1	0	0	0	0	0	0	5149	Scotland_N.AG	5569	England_N_Megalithic_son.I30334.TW
I3085	I12437	8.4682	8.4682	1	0	0	0	0	0	0	5149	Scotland_N.AG	5600	England_N_Megalithic_father.I13888.father.I21393.father.I21389.father.I30304.son.I30334.son.I30300.AG
I3085	I21389	8.9261	8.9261	1	0	0	0	0	0	0	5149	Scotland_N.AG	5585	England_N_Megalithic.TW
I3085	I21393	12.8072	12.8072	1	12.8072	1	0	0	0	0	5149	Scotland_N.AG	5600	England_N_Megalithic.TW
I3085	NEO624	12.0677	90.7938	9	12.0677	1	0	0	0	0	5149	Scotland_N.AG	4903	Great_Britain_Orkney_N.SG
I3085	NEO625	12.9737	46.3052	4	12.9737	1	0	0	0	0	5149	Scotland_N.AG	5138	Great_Britain_Orkney_N_father.NEO624.SG
I3085	KH150637	10.8958	10.8958	1	0	0	0	0	0	0	5149	Scotland_N.AG	5250	Germany_Niedertiefenbach
I3085	KH210846	8.2131	8.2131	1	0	0	0	0	0	0	5149	Scotland_N.AG	5225	Germany_Sorsum
I3085	KH210914	8.5538	8.5538	1	0	0	0	0	0	0	5149	Scotland_N.AG	5225	Germany_Sorsum
I3085	KH180089	10.4651	10.4651	1	0	0	0	0	0	0	5149	Scotland_N.AG	5150	Germany_Warburg
I3133	I3134	9.5567	9.5567	1	0	0	0	0	0	0	5446	Scotland_N.AG	5461	Scotland_N.AG
I3133	I3136	31.7498	50.9866	3	31.7498	1	31.7498	1	31.7498	1	5446	Scotland_N.AG	5397	Scotland_N.AG
I3133	I3138	19.1295	27.3628	2	19.1295	1	19.1295	1	0	0	5446	Scotland_N.AG	4998	Scotland_N.AG
I3133	I5366	8.67561	17.1589	2	0	0	0	0	0	0	5446	Scotland_N.AG	5516	England_N.AG
I3133	I5379	9.9983	9.9983	1	0	0	0	0	0	0	5446	Scotland_N.AG	4333	England_BellBeaker_highEEF.AG
I3133	I2636	12.8812	12.8812	1	12.8812	1	0	0	0	0	5446	Scotland_N.AG	5397	Scotland_N.AG
I3133	I6746	8.5671	8.5671	1	0	0	0	0	0	0	5446	Scotland_N.AG	5526	England_N.AG
I3133	I6751	8.73331	17.0999	2	0	0	0	0	0	0	5446	Scotland_N.AG	5650	England_N.AG
I3133	I6753	11.3063	11.3063	1	0	0	0	0	0	0	5446	Scotland_N.AG	5305	England_N.AG
I3133	I6759	9.81731	9.81731	1	0	0	0	0	0	0	5446	Scotland_N.AG	5527	England_N.AG
I3133	I6766	8.48041	8.48041	1	0	0	0	0	0	0	5446	Scotland_N.AG	5100	Scotland_N.AG
I3133	I7554	8.56711	8.56711	1	0	0	0	0	0	0	5446	Scotland_N.AG	5182	Scotland_N.AG
I3133	I6762	9.0276	9.0276	1	0	0	0	0	0	0	5446	Scotland_N.AG	5700	England_N.AG
I3133	CH448	8.36341	8.36341	1	0	0	0	0	0	0	5446	Scotland_N.AG	5517	Ireland_MN.SG
I3133	GNM1076	9.6984	9.6984	1	0	0	0	0	0	0	5446	Scotland_N.AG	5135	Ireland_MN.SG
I3133	PB1794	9.3118	9.3118	1	0	0	0	0	0	0	5446	Scotland_N.AG	5486	Ireland_MN.SG
I3133	PB186	8.2685	8.2685	1	0	0	0	0	0	0	5446	Scotland_N.AG	5393	Ireland_MN.SG
I3133	PB2031	9.66949	9.66949	1	0	0	0	0	0	0	5446	Scotland_N.AG	5431	Ireland_MN.SG
I3133	PB357	9.8439	9.8439	1	0	0	0	0	0	0	5446	Scotland_N.AG	5545	Ireland_EN_MN.SG
I3133	PB581	9.7543	28.6209	3	0	0	0	0	0	0	5446	Scotland_N.AG	5413	Ireland_MN.SG
I3133	PB672	9.0788	9.0788	1	0	0	0	0	0	0	5446	Scotland_N.AG	5442	Ireland_MN.SG
I3133	PN05	10.2621	10.2621	1	0	0	0	0	0	0	5446	Scotland_N.AG	5729	Ireland_EN.SG
I3133	PN07	8.6772	8.6772	1	0	0	0	0	0	0	5446	Scotland_N.AG	5410	Ireland_MN.SG
I3133	PN10_PN113	16.6613	16.6613	1	16.6613	1	16.6613	1	0	0	5446	Scotland_N.AG	5746	Ireland_EN.SG
I3133	611	14.2598	14.2598	1	14.2598	1	0	0	0	0	5446	Scotland_N.AG	5418	England_Trumpington_N.SG
I3133	613	8.5413	8.5413	1	0	0	0	0	0	0	5446	Scotland_N.AG	5639	England_Trumpington_N_brother.TRPTN_611.SG
I3133	I11248	9.1884	9.1884	1	0	0	0	0	0	0	5446	Scotland_N.AG	5050	Spain_MLN.AG
I3133	I13889	9.2768	9.2768	1	0	0	0	0	0	0	5446	Scotland_N.AG	5624	England_N_Megalithic.AG
I3133	I13892	8.7813	8.7813	1	0	0	0	0	0	0	5446	Scotland_N.AG	5677	England_N_Megalithic.AG
I3133	I14326	9.4616	9.4616	1	0	0	0	0	0	0	5446	Scotland_N.AG	4908	England_N.AG
I3133	I21390	10.1648	29.1782	3	0	0	0	0	0	0	5446	Scotland_N.AG	5630	England_N_Megalithic.AG
I3133	I13893	8.8385	8.8385	1	0	0	0	0	0	0	5446	Scotland_N.AG	5517	England_N_Megalithic.AG
I3133	I30299	8.2422	8.2422	1	0	0	0	0	0	0	5446	Scotland_N.AG	5535	England_N_Megalithic_son.I30300.son.I30302.brother.I12440.TW
I3133	I30334	9.6462	9.6462	1	0	0	0	0	0	0	5446	Scotland_N.AG	5575	England_N_Megalithic.TW
I3133	I13897	11.7018	30.5104	3	0	0	0	0	0	0	5446	Scotland_N.AG	5600	England_N_Megalithic_lc.TW
I3133	I13898	9.9195	19.7736	2	0	0	0	0	0	0	5446	Scotland_N.AG	5569	England_N_Megalithic_son.I30334.TW
I3133	I13899	12.5365	12.5365	1	12.5365	1	0	0	0	0	5446	Scotland_N.AG	5600	England_N_Megalithic.TW
I3133	I13895	20.4954	30.6238	2	20.4954	1	20.4954	1	20.4954	1	5446	Scotland_N.AG	5600	England_N_Megalithic_father.I20821.son.I21390.TW
I3133	I12437	9.7609	9.7609	1	0	0	0	0	0	0	5446	Scotland_N.AG	5600	England_N_Megalithic_father.I13888.father.I21393.father.I21389.father.I30304.son.I30334.son.I30300.AG
I3133	I21385	8.057	8.057	1	0	0	0	0	0	0	5446	Scotland_N.AG	5680	England_N_Megalithic.TW
I3133	I21388	10.7727	10.7727	1	0	0	0	0	0	0	5446	Scotland_N.AG	5657	England_N_Megalithic_son.I30300.son.I21390.TW
I3133	I21389	11.2072	20.2873	2	0	0	0	0	0	0	5446	Scotland_N.AG	5585	England_N_Megalithic.TW
I3133	KH150618	8.52931	8.52931	1	0	0	0	0	0	0	5446	Scotland_N.AG	5250	Germany_Niedertiefenbach
I3133	KH150641	8.4362	8.4362	1	0	0	0	0	0	0	5446	Scotland_N.AG	5250	Germany_Niedertiefenbach
I3133	KH210846	8.5611	8.5611	1	0	0	0	0	0	0	5446	Scotland_N.AG	5225	Germany_Sorsum
I3133	KH210914	8.6614	8.6614	1	0	0	0	0	0	0	5446	Scotland_N.AG	5225	Germany_Sorsum
I3134	I3135	13.5865	13.5865	1	13.5865	1	0	0	0	0	5461	Scotland_N.AG	5517	Scotland_N_lowEEF.AG
I3134	I3136	13.4055	13.4055	1	13.4055	1	0	0	0	0	5461	Scotland_N.AG	5397	Scotland_N.AG
I3134	I3138	8.1916	8.1916	1	0	0	0	0	0	0	5461	Scotland_N.AG	4998	Scotland_N.AG
I3134	I2636	16.1284	16.1284	1	16.1284	1	16.1284	1	0	0	5461	Scotland_N.AG	5397	Scotland_N.AG
I3134	I6751	10.2076	10.2076	1	0	0	0	0	0	0	5461	Scotland_N.AG	5650	England_N.AG
I3134	I6753	8.84249	8.84249	1	0	0	0	0	0	0	5461	Scotland_N.AG	5305	England_N.AG
I3134	I7191	8.9402	8.9402	1	0	0	0	0	0	0	5461	Scotland_N.AG	5657	Czechia_C_Baalberge.AG
I3134	I7272	8.51619	8.51619	1	0	0	0	0	0	0	5461	Scotland_N.AG	5417	Czechia_Eneolithic.AG
I3134	I7554	8.4569	8.4569	1	0	0	0	0	0	0	5461	Scotland_N.AG	5182	Scotland_N.AG
I3134	I6762	15.3695	24.8278	2	15.3695	1	0	0	0	0	5461	Scotland_N.AG	5700	England_N.AG
I3134	ARD2	12.9239	12.9239	1	12.9239	1	0	0	0	0	5461	Scotland_N.AG	5401	Ireland_MN.SG
I3134	CAK530	8.2776	8.2776	1	0	0	0	0	0	0	5461	Scotland_N.AG	4711	Ireland_LN.SG
I3134	CH448	13.3801	13.3801	1	13.3801	1	0	0	0	0	5461	Scotland_N.AG	5517	Ireland_MN.SG
I3134	GNM1076	10.1064	10.1064	1	0	0	0	0	0	0	5461	Scotland_N.AG	5135	Ireland_MN.SG
I3134	PB1794	9.61409	9.61409	1	0	0	0	0	0	0	5461	Scotland_N.AG	5486	Ireland_MN.SG
I3134	PB2031	8.3551	8.3551	1	0	0	0	0	0	0	5461	Scotland_N.AG	5431	Ireland_MN.SG
I3134	PB357	9.5268	9.5268	1	0	0	0	0	0	0	5461	Scotland_N.AG	5545	Ireland_EN_MN.SG
I3134	PB581	10.2338	10.2338	1	0	0	0	0	0	0	5461	Scotland_N.AG	5413	Ireland_MN.SG
I3134	PB675	9.21819	17.3469	2	0	0	0	0	0	0	5461	Scotland_N.AG	5171	Ireland_MN.SG
I3134	PN02	8.3978	8.3978	1	0	0	0	0	0	0	5461	Scotland_N.AG	5546	Ireland_EN_MN.SG
I3134	PN03	8.442	8.442	1	0	0	0	0	0	0	5461	Scotland_N.AG	5460	Ireland_MN.SG
I3134	PN04	9.659	19.0831	2	0	0	0	0	0	0	5461	Scotland_N.AG	5742	Ireland_EN.SG
I3134	PN05	8.0732	8.0732	1	0	0	0	0	0	0	5461	Scotland_N.AG	5729	Ireland_EN.SG
I3134	PN107	8.8027	16.9022	2	0	0	0	0	0	0	5461	Scotland_N.AG	5705	Ireland_EN.SG
I3134	PN10_PN113	9.0165	9.0165	1	0	0	0	0	0	0	5461	Scotland_N.AG	5746	Ireland_EN.SG
I3134	PN13	10.9529	10.9529	1	0	0	0	0	0	0	5461	Scotland_N.AG	5572	Ireland_EN_MN.SG
I3134	611	12.8573	12.8573	1	12.8573	1	0	0	0	0	5461	Scotland_N.AG	5418	England_Trumpington_N.SG
I3134	I14326	8.3245	8.3245	1	0	0	0	0	0	0	5461	Scotland_N.AG	4908	England_N.AG
I3134	I21390	14.3193	22.4419	2	14.3193	1	0	0	0	0	5461	Scotland_N.AG	5630	England_N_Megalithic.AG
I3134	I30299	8.0531	8.0531	1	0	0	0	0	0	0	5461	Scotland_N.AG	5535	England_N_Megalithic_son.I30300.son.I30302.brother.I12440.TW
I3134	I30301	12.5868	12.5868	1	12.5868	1	0	0	0	0	5461	Scotland_N.AG	5575	England_N_Megalithic.TW
I3134	I30334	8.8715	8.8715	1	0	0	0	0	0	0	5461	Scotland_N.AG	5575	England_N_Megalithic.TW
I3134	I13898	11.4398	11.4398	1	0	0	0	0	0	0	5461	Scotland_N.AG	5569	England_N_Megalithic_son.I30334.TW
I3134	I13895	9.22511	9.22511	1	0	0	0	0	0	0	5461	Scotland_N.AG	5600	England_N_Megalithic_father.I20821.son.I21390.TW
I3134	I12437	9.3564	9.3564	1	0	0	0	0	0	0	5461	Scotland_N.AG	5600	England_N_Megalithic_father.I13888.father.I21393.father.I21389.father.I30304.son.I30334.son.I30300.AG
I3134	I21385	8.5183	16.5678	2	0	0	0	0	0	0	5461	Scotland_N.AG	5680	England_N_Megalithic.TW
I3134	I21388	12.6656	12.6656	1	12.6656	1	0	0	0	0	5461	Scotland_N.AG	5657	England_N_Megalithic_son.I30300.son.I21390.TW
I3134	NEO624	10.2076	10.2076	1	0	0	0	0	0	0	5461	Scotland_N.AG	4903	Great_Britain_Orkney_N.SG
I3134	KH150626	8.87851	8.87851	1	0	0	0	0	0	0	5461	Scotland_N.AG	5250	Germany_Niedertiefenbach
I3134	KH180068	10.3427	10.3427	1	0	0	0	0	0	0	5461	Scotland_N.AG	5150	Germany_Warburg
I3134	KH180391	8.0672	8.0672	1	0	0	0	0	0	0	5461	Scotland_N.AG	5170	Germany_Rimbeck
I3134	KH210852	8.9048	8.9048	1	0	0	0	0	0	0	5461	Scotland_N.AG	5225	Germany_Sorsum
I3134	KH210928_KH210942	10.972	10.972	1	0	0	0	0	0	0	5461	Scotland_N.AG	5225	Germany_Sorsum
I3135	I6747	11.8613	11.8613	1	0	0	0	0	0	0	5517	Scotland_N_lowEEF.AG	5528	England_N.AG
I3135	I6761	12.1512	12.1512	1	12.1512	1	0	0	0	0	5517	Scotland_N_lowEEF.AG	5525	England_N.AG
I3135	I6766	8.8807	8.8807	1	0	0	0	0	0	0	5517	Scotland_N_lowEEF.AG	5100	Scotland_N.AG
I3135	ANN1	8.0606	8.0606	1	0	0	0	0	0	0	5517	Scotland_N_lowEEF.AG	5405	Ireland_MN.SG
I3135	ASH3	8.4522	8.4522	1	0	0	0	0	0	0	5517	Scotland_N_lowEEF.AG	5609	Ireland_EN_MN.SG
I3135	CAK531	19.1854	19.1854	1	19.1854	1	19.1854	1	0	0	5517	Scotland_N_lowEEF.AG	4701	Ireland_LN.SG
I3135	CAK533	14.4784	14.4784	1	14.4784	1	0	0	0	0	5517	Scotland_N_lowEEF.AG	4926	Ireland_LN.SG
I3135	GNM1076	8.6246	8.6246	1	0	0	0	0	0	0	5517	Scotland_N_lowEEF.AG	5135	Ireland_MN.SG
I3135	PB443	11.3943	11.3943	1	0	0	0	0	0	0	5517	Scotland_N_lowEEF.AG	5474	Ireland_MN.SG
I3135	PB768	18.8414	18.8414	1	18.8414	1	18.8414	1	0	0	5517	Scotland_N_lowEEF.AG	5475	Ireland_MN.SG
I3135	PN05	8.8109	8.8109	1	0	0	0	0	0	0	5517	Scotland_N_lowEEF.AG	5729	Ireland_EN.SG
I3135	PN13	8.1417	8.1417	1	0	0	0	0	0	0	5517	Scotland_N_lowEEF.AG	5572	Ireland_EN_MN.SG
I3135	LugarCanto44	8.2655	8.2655	1	0	0	0	0	0	0	5517	Scotland_N_lowEEF.AG	5950	Portugal_MN.SG
I3135	611	11.9818	11.9818	1	0	0	0	0	0	0	5517	Scotland_N_lowEEF.AG	5418	England_Trumpington_N.SG
I3135	I13892	8.8678	17.2146	2	0	0	0	0	0	0	5517	Scotland_N_lowEEF.AG	5677	England_N_Megalithic.AG
I3135	I15029	10.4684	10.4684	1	0	0	0	0	0	0	5517	Scotland_N_lowEEF.AG	5700	France_N.AG
I3135	I30300	10.3078	10.3078	1	0	0	0	0	0	0	5517	Scotland_N_lowEEF.AG	5575	England_N_Megalithic.TW
I3135	I30293	8.3307	8.3307	1	0	0	0	0	0	0	5517	Scotland_N_lowEEF.AG	5575	England_N_Megalithic.TW
I3135	I30299	9.2782	9.2782	1	0	0	0	0	0	0	5517	Scotland_N_lowEEF.AG	5535	England_N_Megalithic_son.I30300.son.I30302.brother.I12440.TW
I3135	I30334	11.8081	20.0025	2	0	0	0	0	0	0	5517	Scotland_N_lowEEF.AG	5575	England_N_Megalithic.TW
I3135	I13897	10.2214	10.2214	1	0	0	0	0	0	0	5517	Scotland_N_lowEEF.AG	5600	England_N_Megalithic_lc.TW
I3135	I13898	8.329	8.329	1	0	0	0	0	0	0	5517	Scotland_N_lowEEF.AG	5569	England_N_Megalithic_son.I30334.TW
I3135	I13899	14.6596	25.872	2	14.6596	1	0	0	0	0	5517	Scotland_N_lowEEF.AG	5600	England_N_Megalithic.TW
I3135	I12437	9.2875	17.6221	2	0	0	0	0	0	0	5517	Scotland_N_lowEEF.AG	5600	England_N_Megalithic_father.I13888.father.I21393.father.I21389.father.I30304.son.I30334.son.I30300.AG
I3135	I21389	9.2921	9.2921	1	0	0	0	0	0	0	5517	Scotland_N_lowEEF.AG	5585	England_N_Megalithic.TW
I3135	I21393	11.6106	11.6106	1	0	0	0	0	0	0	5517	Scotland_N_lowEEF.AG	5600	England_N_Megalithic.TW
I3135	NEO625	12.8933	12.8933	1	12.8933	1	0	0	0	0	5517	Scotland_N_lowEEF.AG	5138	Great_Britain_Orkney_N_father.NEO624.SG
I3135	FRA020	11.2963	11.2963	1	0	0	0	0	0	0	5517	Scotland_N_lowEEF.AG	4918	Sweden_Fralsegarden_N.SG
I3135	KH150189_KH150632_KH150636	8.9597	8.9597	1	0	0	0	0	0	0	5517	Scotland_N_lowEEF.AG	5250	Germany_Niedertiefenbach
I3135	KH180137_KH182329	9.6158	9.6158	1	0	0	0	0	0	0	5517	Scotland_N_lowEEF.AG	5137	Germany_Altendorf
I3135	KH210858_KH210949	8.70529	8.70529	1	0	0	0	0	0	0	5517	Scotland_N_lowEEF.AG	5225	Germany_Sorsum
I3136	I5359	11.9259	21.0436	2	0	0	0	0	0	0	5397	Scotland_N.AG	5600	Wales_N.AG
I3136	I5366	8.19861	8.19861	1	0	0	0	0	0	0	5397	Scotland_N.AG	5516	England_N.AG
I3136	I2452	8.2012	8.2012	1	0	0	0	0	0	0	5397	Scotland_N.AG	4052	England_BellBeaker.AG
I3136	I6746	9.75299	9.75299	1	0	0	0	0	0	0	5397	Scotland_N.AG	5526	England_N.AG
I3136	I6760	9.2479	9.2479	1	0	0	0	0	0	0	5397	Scotland_N.AG	5781	England_N.AG
I3136	I6761	11.4936	21.5422	2	0	0	0	0	0	0	5397	Scotland_N.AG	5525	England_N.AG
I3136	I7554	9.1931	9.1931	1	0	0	0	0	0	0	5397	Scotland_N.AG	5182	Scotland_N.AG
I3136	HOL002	8.3708	8.3708	1	0	0	0	0	0	0	5397	Scotland_N.AG	5140	Czechia_N_Baden.AG
I3136	CAK533	11.1081	11.1081	1	0	0	0	0	0	0	5397	Scotland_N.AG	4926	Ireland_LN.SG
I3136	CH448	13.9366	22.5619	2	13.9366	1	0	0	0	0	5397	Scotland_N.AG	5517	Ireland_MN.SG
I3136	GNM1076	14.3101	22.8781	2	14.3101	1	0	0	0	0	5397	Scotland_N.AG	5135	Ireland_MN.SG
I3136	PB1327	8.3858	8.3858	1	0	0	0	0	0	0	5397	Scotland_N.AG	5407	Ireland_MN.SG
I3136	PB1794	10.5029	10.5029	1	0	0	0	0	0	0	5397	Scotland_N.AG	5486	Ireland_MN.SG
I3136	PB186	8.5963	8.5963	1	0	0	0	0	0	0	5397	Scotland_N.AG	5393	Ireland_MN.SG
I3136	PB357	10.1842	10.1842	1	0	0	0	0	0	0	5397	Scotland_N.AG	5545	Ireland_EN_MN.SG
I3136	PB672	10.0765	10.0765	1	0	0	0	0	0	0	5397	Scotland_N.AG	5442	Ireland_MN.SG
I3136	PB675	8.2941	8.2941	1	0	0	0	0	0	0	5397	Scotland_N.AG	5171	Ireland_MN.SG
I3136	PB768	10.8466	19.0546	2	0	0	0	0	0	0	5397	Scotland_N.AG	5475	Ireland_MN.SG
I3136	PN02	8.7538	8.7538	1	0	0	0	0	0	0	5397	Scotland_N.AG	5546	Ireland_EN_MN.SG
I3136	PN03	9.2721	26.1986	3	0	0	0	0	0	0	5397	Scotland_N.AG	5460	Ireland_MN.SG
I3136	PN04	15.7759	15.7759	1	15.7759	1	0	0	0	0	5397	Scotland_N.AG	5742	Ireland_EN.SG
I3136	PN05	11.3148	31.3905	3	0	0	0	0	0	0	5397	Scotland_N.AG	5729	Ireland_EN.SG
I3136	PN07	8.1949	8.1949	1	0	0	0	0	0	0	5397	Scotland_N.AG	5410	Ireland_MN.SG
I3136	PN107	10.8904	10.8904	1	0	0	0	0	0	0	5397	Scotland_N.AG	5705	Ireland_EN.SG
I3136	PN10_PN113	8.2583	8.2583	1	0	0	0	0	0	0	5397	Scotland_N.AG	5746	Ireland_EN.SG
I3136	PN12	8.89151	8.89151	1	0	0	0	0	0	0	5397	Scotland_N.AG	5383	Ireland_MN.SG
I3136	PN13	9.2219	9.2219	1	0	0	0	0	0	0	5397	Scotland_N.AG	5572	Ireland_EN_MN.SG
I3136	I13892	11.0783	11.0783	1	0	0	0	0	0	0	5397	Scotland_N.AG	5677	England_N_Megalithic.AG
I3136	I14174	8.0112	8.0112	1	0	0	0	0	0	0	5397	Scotland_N.AG	5850	Czechia_C_Baalberge.AG
I3136	I21390	8.98321	17.3074	2	0	0	0	0	0	0	5397	Scotland_N.AG	5630	England_N_Megalithic.AG
I3136	I13896	8.6334	8.6334	1	0	0	0	0	0	0	5397	Scotland_N.AG	5486	England_N_Megalithic_sister.I21395.daughter.I30332.AG
I3136	I30334	16.0723	29.3599	2	29.3599	2	16.0723	1	0	0	5397	Scotland_N.AG	5575	England_N_Megalithic.TW
I3136	I13898	15.8369	28.1371	2	28.1371	2	0	0	0	0	5397	Scotland_N.AG	5569	England_N_Megalithic_son.I30334.TW
I3136	I20821	9.0514	9.0514	1	0	0	0	0	0	0	5397	Scotland_N.AG	5486	England_N_Megalithic.TW
I3136	I13895	9.50661	18.3589	2	0	0	0	0	0	0	5397	Scotland_N.AG	5600	England_N_Megalithic_father.I20821.son.I21390.TW
I3136	I12437	11.649	11.649	1	0	0	0	0	0	0	5397	Scotland_N.AG	5600	England_N_Megalithic_father.I13888.father.I21393.father.I21389.father.I30304.son.I30334.son.I30300.AG
I3136	I21385	16.5228	41.8479	3	31.9083	2	16.5228	1	0	0	5397	Scotland_N.AG	5680	England_N_Megalithic.TW
I3136	I21388	8.9996	8.9996	1	0	0	0	0	0	0	5397	Scotland_N.AG	5657	England_N_Megalithic_son.I30300.son.I21390.TW
I3136	I21389	11.6436	21.9793	2	0	0	0	0	0	0	5397	Scotland_N.AG	5585	England_N_Megalithic.TW
I3136	KH150620	8.0691	8.0691	1	0	0	0	0	0	0	5397	Scotland_N.AG	5250	Germany_Niedertiefenbach
I3136	KH170066	8.3575	8.3575	1	0	0	0	0	0	0	5397	Scotland_N.AG	5225	Germany_Sorsum
I3136	KH210853	9.3822	9.3822	1	0	0	0	0	0	0	5397	Scotland_N.AG	5225	Germany_Sorsum
I3136	KH210856	8.0069	8.0069	1	0	0	0	0	0	0	5397	Scotland_N.AG	5225	Germany_Sorsum
I3136	KH200155	8.09489	8.09489	1	0	0	0	0	0	0	5397	Scotland_N.AG	5150	Germany_Warburg
I3136	KH200229	9.3586	9.3586	1	0	0	0	0	0	0	5397	Scotland_N.AG	5150	Germany_Warburg
I3138	I6746	9.682	9.682	1	0	0	0	0	0	0	4998	Scotland_N.AG	5526	England_N.AG
I3138	I6747	8.0693	8.0693	1	0	0	0	0	0	0	4998	Scotland_N.AG	5528	England_N.AG
I3138	I6751	8.0752	8.0752	1	0	0	0	0	0	0	4998	Scotland_N.AG	5650	England_N.AG
I3138	I6761	14.4438	23.7497	2	14.4438	1	0	0	0	0	4998	Scotland_N.AG	5525	England_N.AG
I3138	ASH3	8.4728	8.4728	1	0	0	0	0	0	0	4998	Scotland_N.AG	5609	Ireland_EN_MN.SG
I3138	CAK531	8.5255	8.5255	1	0	0	0	0	0	0	4998	Scotland_N.AG	4701	Ireland_LN.SG
I3138	GNM1076	9.2971	9.2971	1	0	0	0	0	0	0	4998	Scotland_N.AG	5135	Ireland_MN.SG
I3138	PB1794	11.9033	11.9033	1	0	0	0	0	0	0	4998	Scotland_N.AG	5486	Ireland_MN.SG
I3138	PB186	8.9307	8.9307	1	0	0	0	0	0	0	4998	Scotland_N.AG	5393	Ireland_MN.SG
I3138	PB443	8.2268	8.2268	1	0	0	0	0	0	0	4998	Scotland_N.AG	5474	Ireland_MN.SG
I3138	PB675	8.0168	8.0168	1	0	0	0	0	0	0	4998	Scotland_N.AG	5171	Ireland_MN.SG
I3138	PN02	10.3745	10.3745	1	0	0	0	0	0	0	4998	Scotland_N.AG	5546	Ireland_EN_MN.SG
I3138	PN04	9.6168	9.6168	1	0	0	0	0	0	0	4998	Scotland_N.AG	5742	Ireland_EN.SG
I3138	PN10_PN113	8.36359	8.36359	1	0	0	0	0	0	0	4998	Scotland_N.AG	5746	Ireland_EN.SG
I3138	PN12	9.3484	9.3484	1	0	0	0	0	0	0	4998	Scotland_N.AG	5383	Ireland_MN.SG
I3138	I13889	12.0457	12.0457	1	12.0457	1	0	0	0	0	4998	Scotland_N.AG	5624	England_N_Megalithic.AG
I3138	I13892	8.8664	8.8664	1	0	0	0	0	0	0	4998	Scotland_N.AG	5677	England_N_Megalithic.AG
I3138	I12439	11.5776	11.5776	1	0	0	0	0	0	0	4998	Scotland_N.AG	5600	England_N_Megalithic.AG
I3138	I13896	9.1886	9.1886	1	0	0	0	0	0	0	4998	Scotland_N.AG	5486	England_N_Megalithic_sister.I21395.daughter.I30332.AG
I3138	I30301	8.1094	8.1094	1	0	0	0	0	0	0	4998	Scotland_N.AG	5575	England_N_Megalithic.TW
I3138	I30334	11.5423	11.5423	1	0	0	0	0	0	0	4998	Scotland_N.AG	5575	England_N_Megalithic.TW
I3138	I13898	12.1596	12.1596	1	12.1596	1	0	0	0	0	4998	Scotland_N.AG	5569	England_N_Megalithic_son.I30334.TW
I3138	I13895	8.1954	8.1954	1	0	0	0	0	0	0	4998	Scotland_N.AG	5600	England_N_Megalithic_father.I20821.son.I21390.TW
I3138	I12437	11.6584	11.6584	1	0	0	0	0	0	0	4998	Scotland_N.AG	5600	England_N_Megalithic_father.I13888.father.I21393.father.I21389.father.I30304.son.I30334.son.I30300.AG
I3138	I21393	11.5504	11.5504	1	0	0	0	0	0	0	4998	Scotland_N.AG	5600	England_N_Megalithic.TW
I3138	ROS018	9.1436	9.1436	1	0	0	0	0	0	0	4998	Scotland_N.AG	5148	Sweden_Rossberga_N.SG
I3256	I3601	11.6127	11.6127	1	0	0	0	0	0	0	4063	England_BellBeaker.AG	4175	Germany_BellBeaker.AG
I3256	I5367	16.4125	31.7568	2	31.7568	2	16.4125	1	0	0	4063	England_BellBeaker.AG	4312	Scotland_BellBeaker.AG
I3256	I6579	8.11731	8.11731	1	0	0	0	0	0	0	4063	England_BellBeaker.AG	4155	Poland_EBA.AG
I3256	I0103	10.1547	10.1547	1	0	0	0	0	0	0	4063	England_BellBeaker.AG	4472	Germany_CordedWare.AG
I3256	I11442	15.8443	15.8443	1	15.8443	1	0	0	0	0	4063	England_BellBeaker.AG	4120	Italy_Sicily_EBA.AG
I3256	I11443	15.8189	37.4855	3	29.2102	2	0	0	0	0	4063	England_BellBeaker.AG	4090	Italy_Sicily_EBA_o2.AG
I3256	I2454	9.7813	9.7813	1	0	0	0	0	0	0	4063	England_BellBeaker.AG	4042	England_BellBeaker_lowEEF.AG
I3256	I4074	9.4198	9.4198	1	0	0	0	0	0	0	4063	England_BellBeaker.AG	4030	Netherlands_LNB_BellBeaker.AG
I3256	I4886	9.2791	9.2791	1	0	0	0	0	0	0	4063	England_BellBeaker.AG	4088	Czechia_BellBeaker.AG
I3256	I4895	11.9629	11.9629	1	0	0	0	0	0	0	4063	England_BellBeaker.AG	4106	Czechia_BellBeaker.AG
I3256	I4950	11.6997	22.5391	2	0	0	0	0	0	0	4063	England_BellBeaker.AG	4250	England_BellBeaker.AG
I3256	I5512	20.997	20.997	1	20.997	1	20.997	1	20.997	1	4063	England_BellBeaker.AG	4250	England_BellBeaker.AG
I3256	I5513	11.3276	21.1182	2	0	0	0	0	0	0	4063	England_BellBeaker.AG	4250	England_BellBeaker.AG
I3256	I5514	11.0937	19.6846	2	0	0	0	0	0	0	4063	England_BellBeaker.AG	4155	Czechia_BellBeaker.AG
I3256	I5748	9.9889	18.249	2	0	0	0	0	0	0	4063	England_BellBeaker.AG	4383	Netherlands_LNB_BellBeaker.AG
I3256	I6774	8.9558	8.9558	1	0	0	0	0	0	0	4063	England_BellBeaker.AG	4121	England_BellBeaker_lowEEF.AG
I3256	I6775	10.6516	10.6516	1	0	0	0	0	0	0	4063	England_BellBeaker.AG	4150	England_BellBeaker.AG
I3256	I6777	13.0828	13.0828	1	13.0828	1	0	0	0	0	4063	England_BellBeaker.AG	4050	England_C_EBA.AG
I3256	I7198	9.6719	18.2129	2	0	0	0	0	0	0	4063	England_BellBeaker.AG	4026	Czechia_EBA.AG
I3256	I7199	11.5126	11.5126	1	0	0	0	0	0	0	4063	England_BellBeaker.AG	4039	Czechia_EBA.AG
I3256	I7207	12.3263	12.3263	1	12.3263	1	0	0	0	0	4063	England_BellBeaker.AG	4370	Czechia_EBA_CordedWare.AG
I3256	I7211	13.2982	13.2982	1	13.2982	1	0	0	0	0	4063	England_BellBeaker.AG	4183	Czechia_BellBeaker.AG
I3256	I7213	9.2256	17.4548	2	0	0	0	0	0	0	4063	England_BellBeaker.AG	4231	Czechia_BellBeaker.AG
I3256	I7214	8.4212	8.4212	1	0	0	0	0	0	0	4063	England_BellBeaker.AG	4200	Czechia_BellBeaker.AG
I3256	I7251	10.1786	10.1786	1	0	0	0	0	0	0	4063	England_BellBeaker.AG	4200	Czechia_BA_BellBeaker.AG
I3256	I7269	8.53601	8.53601	1	0	0	0	0	0	0	4063	England_BellBeaker.AG	4200	Czechia_BA_BellBeaker.AG
I3256	I7276	9.37909	17.7939	2	0	0	0	0	0	0	4063	England_BellBeaker.AG	4200	Czechia_BA_BellBeaker.AG
I3256	I7278	9.9996	9.9996	1	0	0	0	0	0	0	4063	England_BellBeaker.AG	4333	Czechia_BA_BellBeaker.AG
I3256	I7281	9.4582	9.4582	1	0	0	0	0	0	0	4063	England_BellBeaker.AG	4194	Czechia_BellBeaker.AG
I3256	I7286	8.029	8.029	1	0	0	0	0	0	0	4063	England_BellBeaker.AG	4221	Czechia_BellBeaker.AG
I3256	I7289	11.5009	11.5009	1	0	0	0	0	0	0	4063	England_BellBeaker.AG	4289	Czechia_BellBeaker_sibling.I7214.AG
I3256	I7290	9.966	9.966	1	0	0	0	0	0	0	4063	England_BellBeaker.AG	4200	Czechia_BellBeaker.AG
I3256	I0059	8.0738	8.0738	1	0	0	0	0	0	0	4063	England_BellBeaker.AG	4179	Germany_BenzigerodeHeimburg_LN.AG
I3256	I0112	17.6648	17.6648	1	17.6648	1	17.6648	1	0	0	4063	England_BellBeaker.AG	4224	Germany_BellBeaker.AG
I3256	I0117	8.0613	8.0613	1	0	0	0	0	0	0	4063	England_BellBeaker.AG	4092	Germany_EBA_Unetice.AG
I3256	I1549	13.3443	22.0096	2	13.3443	1	0	0	0	0	4063	England_BellBeaker.AG	4225	Germany_BellBeaker.AG
I3256	HUGO_168	20.873	38.285	3	20.873	1	20.873	1	20.873	1	4063	England_BellBeaker.AG	4167	Germany_Lech_BellBeaker_possible.contam.AG
I3256	CAH010	10.0977	10.0977	1	0	0	0	0	0	0	4063	England_BellBeaker.AG	4275	Czechia_EBA_CordedWare.AG
I3256	KO1003	8.1513	8.1513	1	0	0	0	0	0	0	4063	England_BellBeaker.AG	4160	Czechia_BellBeaker.AG
I3256	KO1004	8.1958	8.1958	1	0	0	0	0	0	0	4063	England_BellBeaker.AG	4166	Czechia_BellBeaker.AG
I3256	KO1005	8.916	8.916	1	0	0	0	0	0	0	4063	England_BellBeaker.AG	4331	Czechia_BellBeaker.AG
I3256	KON004	10.7867	19.3114	2	0	0	0	0	0	0	4063	England_BellBeaker.AG	4398	Czechia_EBA_CordedWare.AG
I3256	PRE001	9.56529	9.56529	1	0	0	0	0	0	0	4063	England_BellBeaker.AG	4625	Czechia_N_GlobularAmphora.AG
I3256	PRU002	12.4659	12.4659	1	12.4659	1	0	0	0	0	4063	England_BellBeaker.AG	4470	Czechia_BellBeaker.AG
I3256	STD001	8.5861	8.5861	1	0	0	0	0	0	0	4063	England_BellBeaker.AG	4500	Czechia_EBA_CordedWare.AG
I3256	STD002	8.7887	8.7887	1	0	0	0	0	0	0	4063	England_BellBeaker.AG	4720	Czechia_EBA_CordedWare.AG
I3256	TRM006	8.2297	8.2297	1	0	0	0	0	0	0	4063	England_BellBeaker.AG	4644	Czechia_EBA_CordedWare.AG
I3256	VLI010	8.4742	8.4742	1	0	0	0	0	0	0	4063	England_BellBeaker.AG	4483	Czechia_EBA_CordedWare.AG
I3256	VLI017	8.8678	8.8678	1	0	0	0	0	0	0	4063	England_BellBeaker.AG	4336	Czechia_EBA_CordedWare.AG
I3256	VLI020	11.908	39.9059	4	0	0	0	0	0	0	4063	England_BellBeaker.AG	4446	Czechia_EBA_CordedWare.AG
I3256	VLI029	10.448	18.5641	2	0	0	0	0	0	0	4063	England_BellBeaker.AG	4150	Czechia_BellBeaker.AG
I3256	VLI067	15.6258	15.6258	1	15.6258	1	0	0	0	0	4063	England_BellBeaker.AG	4718	Czechia_EBA_CordedWare.AG
I3256	VLI071	14.7354	14.7354	1	14.7354	1	0	0	0	0	4063	England_BellBeaker.AG	4715	Czechia_EBA_CordedWare.AG
I3256	VLI076	8.9006	17.094	2	0	0	0	0	0	0	4063	England_BellBeaker.AG	4906	Czechia_EBA_CordedWare.AG
I3256	ANN1	8.6642	8.6642	1	0	0	0	0	0	0	4063	England_BellBeaker.AG	5405	Ireland_MN.SG
I3256	N44	10.0607	10.0607	1	0	0	0	0	0	0	4063	England_BellBeaker.AG	4400	Poland_CordedWare_3.SG
I3256	N47	9.1996	9.1996	1	0	0	0	0	0	0	4063	England_BellBeaker.AG	4375	Poland_CordedWare_1.SG
I3256	pcw361	9.7446	9.7446	1	0	0	0	0	0	0	4063	England_BellBeaker.AG	4300	Poland_Southeast_CordedWare.SG
I3256	pcw362	8.3423	8.3423	1	0	0	0	0	0	0	4063	England_BellBeaker.AG	4305	Poland_Southeast_CordedWare.SG
I3256	Plinkaigalis242	9.2778	9.2778	1	0	0	0	0	0	0	4063	England_BellBeaker.AG	4842	Lithuania_LN.AG
I3256	ans014	8.14739	8.14739	1	0	0	0	0	0	0	4063	England_BellBeaker.AG	5111	Sweden_Ansarve_Megalithic.SG
I3256	RISE98	12.9023	22.9491	2	12.9023	1	0	0	0	0	4063	England_BellBeaker.AG	4082	Sweden_LN.SG
I3256	I13028	8.7167	8.7167	1	0	0	0	0	0	0	4063	England_BellBeaker.AG	4250	Netherlands_LNB_BellBeaker.AG
I3256	I15028	8.8147	8.8147	1	0	0	0	0	0	0	4063	England_BellBeaker.AG	4218	France_EBA.AG
I3256	I20997	9.2953	26.329	3	0	0	0	0	0	0	4063	England_BellBeaker.AG	4075	England_C_EBA.AG
I3256	I2443	16.3295	16.3295	1	16.3295	1	16.3295	1	0	0	4063	England_BellBeaker.AG	4091	England_BellBeaker.AG
I3256	FRA202	15.1705	15.1705	1	15.1705	1	0	0	0	0	4063	England_BellBeaker.AG	4348	Sweden_Fralsegarden_Steppe1.SG
I3256	KH180131	8.3868	8.3868	1	0	0	0	0	0	0	4063	England_BellBeaker.AG	5080	Germany_Altendorf
I3256	KH210846	8.1138	8.1138	1	0	0	0	0	0	0	4063	England_BellBeaker.AG	5225	Germany_Sorsum
I3256	KH210853	8.1018	8.1018	1	0	0	0	0	0	0	4063	England_BellBeaker.AG	5225	Germany_Sorsum
I3256	KH210902	8.0343	8.0343	1	0	0	0	0	0	0	4063	England_BellBeaker.AG	5225	Germany_Sorsum
I3256	KH210929	8.5685	8.5685	1	0	0	0	0	0	0	4063	England_BellBeaker.AG	5225	Germany_Sorsum
I3256	KH200134_KH201258	8.8886	8.8886	1	0	0	0	0	0	0	4063	England_BellBeaker.AG	5150	Germany_Warburg
I3269	I0581	19.9525	29.9389	2	19.9525	1	19.9525	1	0	0	4850	Spain_C.AG	4746	Spain_C.AG
I3269	I1978	9.7219	9.7219	1	0	0	0	0	0	0	4850	Spain_C.AG	4825	Spain_C.AG
I3269	I5838	8.9673	8.9673	1	0	0	0	0	0	0	4850	Spain_C.AG	4550	Spain_C.AG
I3269	I7192	10.318	10.318	1	0	0	0	0	0	0	4850	Spain_C.AG	5552	Czechia_C_Baalberge.AG
I3269	I7606	20.4569	45.5196	3	45.5196	3	20.4569	1	20.4569	1	4850	Spain_C.AG	5050	Spain_MLN.AG
I3269	I1300	14.9051	14.9051	1	14.9051	1	0	0	0	0	4850	Spain_C.AG	4550	Spain_C.AG
I3269	GNM1007	8.1761	8.1761	1	0	0	0	0	0	0	4850	Spain_C.AG	5288	Ireland_MN.SG
I3269	ROUQV	9.5912	9.5912	1	0	0	0	0	0	0	4850	Spain_C.AG	5159	France_LaClape_LN_EMBA.SG
I3269	I14675	9.0054	9.0054	1	0	0	0	0	0	0	4850	Spain_C.AG	4021	Italy_Sardinia_C_MonteClaro.AG
I3269	I30300	8.2571	8.2571	1	0	0	0	0	0	0	4850	Spain_C.AG	5575	England_N_Megalithic.TW
I3269	NEO28	8.23	8.23	1	0	0	0	0	0	0	4850	Spain_C.AG	5485	Denmark_SouthScandinavia_EN.SG
I3269	KH150195_KH150196_KH150616	8.6437	8.6437	1	0	0	0	0	0	0	4850	Spain_C.AG	5250	Germany_Niedertiefenbach
I3269	KH180091	10.1112	10.1112	1	0	0	0	0	0	0	4850	Spain_C.AG	5150	Germany_Warburg
I3269	KH210856	12.3602	12.3602	1	12.3602	1	0	0	0	0	4850	Spain_C.AG	5225	Germany_Sorsum
I3269	KH210902	8.726	8.726	1	0	0	0	0	0	0	4850	Spain_C.AG	5225	Germany_Sorsum
I3269	KH210992	8.53521	8.53521	1	0	0	0	0	0	0	4850	Spain_C.AG	5000	Germany_Zuschen
I3601	I5379	8.28919	8.28919	1	0	0	0	0	0	0	4175	Germany_BellBeaker.AG	4333	England_BellBeaker_highEEF.AG
I3601	I6579	11.0494	11.0494	1	0	0	0	0	0	0	4175	Germany_BellBeaker.AG	4155	Poland_EBA.AG
I3601	I6583	16.3315	47.1572	4	29.7188	2	16.3315	1	0	0	4175	Germany_BellBeaker.AG	4138	Poland_BellBeaker.AG
I3601	I0103	17.1558	17.1558	1	17.1558	1	17.1558	1	0	0	4175	Germany_BellBeaker.AG	4472	Germany_CordedWare.AG
I3601	I0118	11.6491	19.6911	2	0	0	0	0	0	0	4175	Germany_BellBeaker.AG	4325	Germany_LN_Alberstedt.AG
I3601	I2604	9.3916	18.7541	2	0	0	0	0	0	0	4175	Germany_BellBeaker.AG	4073	England_C_EBA.AG
I3601	I4074	9.7083	9.7083	1	0	0	0	0	0	0	4175	Germany_BellBeaker.AG	4030	Netherlands_LNB_BellBeaker.AG
I3601	I4885	8.4775	8.4775	1	0	0	0	0	0	0	4175	Germany_BellBeaker.AG	4170	Czechia_BellBeaker.AG
I3601	I4887	13.1161	13.1161	1	13.1161	1	0	0	0	0	4175	Germany_BellBeaker.AG	4071	Czechia_BellBeaker_brother.I4888.AG
I3601	I4895	8.2128	8.2128	1	0	0	0	0	0	0	4175	Germany_BellBeaker.AG	4106	Czechia_BellBeaker.AG
I3601	I4896	16.4296	45.8686	4	16.4296	1	16.4296	1	0	0	4175	Germany_BellBeaker.AG	4163	Czechia_BellBeaker.AG
I3601	I4950	11.5011	21.8722	2	0	0	0	0	0	0	4175	Germany_BellBeaker.AG	4250	England_BellBeaker.AG
I3601	I5512	10.7122	21.1063	2	0	0	0	0	0	0	4175	Germany_BellBeaker.AG	4250	England_BellBeaker.AG
I3601	I5833	10.7756	18.8926	2	0	0	0	0	0	0	4175	Germany_BellBeaker.AG	4200	Germany_BellBeaker.AG
I3601	I5834	11.2991	19.9742	2	0	0	0	0	0	0	4175	Germany_BellBeaker.AG	4200	Germany_BellBeaker.AG
I3601	I5835	13.2775	13.2775	1	13.2775	1	0	0	0	0	4175	Germany_BellBeaker.AG	4200	Germany_BellBeaker_father.or.son.I1533.AG
I3601	I6696	8.2314	8.2314	1	0	0	0	0	0	0	4175	Germany_BellBeaker.AG	4575	Czechia_EBA_CordedWare.SG
I3601	I6774	12.235	12.235	1	12.235	1	0	0	0	0	4175	Germany_BellBeaker.AG	4121	England_BellBeaker_lowEEF.AG
I3601	I7195	12.012	23.3761	2	12.012	1	0	0	0	0	4175	Germany_BellBeaker.AG	4250	Czechia_EBA.AG
I3601	I7209	11.7118	11.7118	1	0	0	0	0	0	0	4175	Germany_BellBeaker.AG	4269	Czechia_EBA_CordedWare.AG
I3601	I7210	10.9036	20.4343	2	0	0	0	0	0	0	4175	Germany_BellBeaker.AG	4071	Czechia_BellBeaker_father.or.son.I7212.AG
I3601	I7211	8.8827	17.6965	2	0	0	0	0	0	0	4175	Germany_BellBeaker.AG	4183	Czechia_BellBeaker.AG
I3601	I7251	13.5204	13.5204	1	13.5204	1	0	0	0	0	4175	Germany_BellBeaker.AG	4200	Czechia_BA_BellBeaker.AG
I3601	I7276	13.3297	13.3297	1	13.3297	1	0	0	0	0	4175	Germany_BellBeaker.AG	4200	Czechia_BA_BellBeaker.AG
I3601	I7281	9.3791	9.3791	1	0	0	0	0	0	0	4175	Germany_BellBeaker.AG	4194	Czechia_BellBeaker.AG
I3601	I7286	12.0039	21.1184	2	12.0039	1	0	0	0	0	4175	Germany_BellBeaker.AG	4221	Czechia_BellBeaker.AG
I3601	I0059	12.6683	33.8915	3	24.775	2	0	0	0	0	4175	Germany_BellBeaker.AG	4179	Germany_BenzigerodeHeimburg_LN.AG
I3601	I0112	11.6749	11.6749	1	0	0	0	0	0	0	4175	Germany_BellBeaker.AG	4224	Germany_BellBeaker.AG
I3601	I0117	11.9667	11.9667	1	0	0	0	0	0	0	4175	Germany_BellBeaker.AG	4092	Germany_EBA_Unetice.AG
I3601	I1549	9.8911	18.0863	2	0	0	0	0	0	0	4175	Germany_BellBeaker.AG	4225	Germany_BellBeaker.AG
I3601	UNTA58_68Sk2	9.4039	17.4667	2	0	0	0	0	0	0	4175	Germany_BellBeaker.AG	4347	Germany_Lech_BellBeaker_possible.contam.AG
I3601	BLS002	14.1622	14.1622	1	14.1622	1	0	0	0	0	4175	Germany_BellBeaker.AG	4692	Czechia_N_GlobularAmphora.AG
I3601	DRO001	10.5646	18.5905	2	0	0	0	0	0	0	4175	Germany_BellBeaker.AG	4697	Czechia_EBA_CordedWare.AG
I3601	HOP003	10.5495	20.7563	2	0	0	0	0	0	0	4175	Germany_BellBeaker.AG	4250	Czechia_BellBeaker.AG
I3601	KO1004	12.1418	12.1418	1	12.1418	1	0	0	0	0	4175	Germany_BellBeaker.AG	4166	Czechia_BellBeaker.AG
I3601	KO1005	8.5813	17.1206	2	0	0	0	0	0	0	4175	Germany_BellBeaker.AG	4331	Czechia_BellBeaker.AG
I3601	KON004	8.7452	8.7452	1	0	0	0	0	0	0	4175	Germany_BellBeaker.AG	4398	Czechia_EBA_CordedWare.AG
I3601	PRU002	14.8511	31.7689	3	14.8511	1	0	0	0	0	4175	Germany_BellBeaker.AG	4470	Czechia_BellBeaker.AG
I3601	ROU001	13.8394	24.8507	2	13.8394	1	0	0	0	0	4175	Germany_BellBeaker.AG	4000	Czechia_EBA_Unetice.AG
I3601	STD001	8.413	8.413	1	0	0	0	0	0	0	4175	Germany_BellBeaker.AG	4500	Czechia_EBA_CordedWare.AG
I3601	STD002	11.7125	44.39	4	0	0	0	0	0	0	4175	Germany_BellBeaker.AG	4720	Czechia_EBA_CordedWare.AG
I3601	TRM006	8.71999	8.71999	1	0	0	0	0	0	0	4175	Germany_BellBeaker.AG	4644	Czechia_EBA_CordedWare.AG
I3601	VLI007	8.0939	8.0939	1	0	0	0	0	0	0	4175	Germany_BellBeaker.AG	4739	Czechia_EBA_CordedWare.AG
I3601	VLI010	8.2845	8.2845	1	0	0	0	0	0	0	4175	Germany_BellBeaker.AG	4483	Czechia_EBA_CordedWare.AG
I3601	VLI061	8.40549	8.40549	1	0	0	0	0	0	0	4175	Germany_BellBeaker.AG	4000	Czechia_EBA_Unetice.AG
I3601	VLI067	9.4255	9.4255	1	0	0	0	0	0	0	4175	Germany_BellBeaker.AG	4718	Czechia_EBA_CordedWare.AG
I3601	VLI076	10.1037	10.1037	1	0	0	0	0	0	0	4175	Germany_BellBeaker.AG	4906	Czechia_EBA_CordedWare.AG
I3601	VLI092	16.3829	16.3829	1	16.3829	1	16.3829	1	0	0	4175	Germany_BellBeaker.AG	4719	Czechia_EBA_CordedWare.AG
I3601	N45	21.2298	21.2298	1	21.2298	1	21.2298	1	21.2298	1	4175	Germany_BellBeaker.AG	4375	Poland_CordedWare_3.SG
I3601	MX198	10.8768	10.8768	1	0	0	0	0	0	0	4175	Germany_BellBeaker.AG	4509	Switzerland_EBA_2.AG
I3601	pcw070	8.6403	8.6403	1	0	0	0	0	0	0	4175	Germany_BellBeaker.AG	4321	Poland_Southeast_CordedWare.SG
I3601	pcw211	9.9961	9.9961	1	0	0	0	0	0	0	4175	Germany_BellBeaker.AG	4300	Poland_Southeast_CordedWare.SG
I3601	pcw362	11.1452	11.1452	1	0	0	0	0	0	0	4175	Germany_BellBeaker.AG	4305	Poland_Southeast_CordedWare.SG
I3601	poz81	9.5887	9.5887	1	0	0	0	0	0	0	4175	Germany_BellBeaker.AG	4702	Poland_CordedWare.SG
I3601	Plinkaigalis242	11.2167	31.9057	3	0	0	0	0	0	0	4175	Germany_BellBeaker.AG	4842	Lithuania_LN.AG
I3601	I15028	8.1974	8.1974	1	0	0	0	0	0	0	4175	Germany_BellBeaker.AG	4218	France_EBA.AG
I3601	I16121	8.072	8.072	1	0	0	0	0	0	0	4175	Germany_BellBeaker.AG	5850	Czechia_C_Baalberge.AG
I3601	I20997	8.73711	8.73711	1	0	0	0	0	0	0	4175	Germany_BellBeaker.AG	4075	England_C_EBA.AG
I3601	NEO51	8.2714	8.2714	1	0	0	0	0	0	0	4175	Germany_BellBeaker.AG	4364	Sweden_MN_BAC.SG
I3601	NEO738	11.1683	11.1683	1	0	0	0	0	0	0	4175	Germany_BellBeaker.AG	4201	Denmark_SouthScandinavia_LN.SG
I3601	FRA201	10.2268	10.2268	1	0	0	0	0	0	0	4175	Germany_BellBeaker.AG	4322	Sweden_Fralsegarden_Steppe1.SG
I3601	FRA202	11.5011	11.5011	1	0	0	0	0	0	0	4175	Germany_BellBeaker.AG	4348	Sweden_Fralsegarden_Steppe1.SG
I3601	KH180059	9.0264	9.0264	1	0	0	0	0	0	0	4175	Germany_BellBeaker.AG	5084	Germany_Altendorf
I5359	I5366	8.1674	8.1674	1	0	0	0	0	0	0	5600	Wales_N.AG	5516	England_N.AG
I5359	I2636	8.242	8.242	1	0	0	0	0	0	0	5600	Wales_N.AG	5397	Scotland_N.AG
I5359	I6746	9.30879	9.30879	1	0	0	0	0	0	0	5600	Wales_N.AG	5526	England_N.AG
I5359	I6751	19.636	19.636	1	19.636	1	19.636	1	0	0	5600	Wales_N.AG	5650	England_N.AG
I5359	I6755	10.0683	10.0683	1	0	0	0	0	0	0	5600	Wales_N.AG	5528	England_N.AG
I5359	ARD2	14.3207	14.3207	1	14.3207	1	0	0	0	0	5600	Wales_N.AG	5401	Ireland_MN.SG
I5359	BG72	10.1771	10.1771	1	0	0	0	0	0	0	5600	Wales_N.AG	5467	Ireland_MN.SG
I5359	CAK531	10.1935	10.1935	1	0	0	0	0	0	0	5600	Wales_N.AG	4701	Ireland_LN.SG
I5359	CH448	8.7256	17.154	2	0	0	0	0	0	0	5600	Wales_N.AG	5517	Ireland_MN.SG
I5359	NG10	10.3702	18.3765	2	0	0	0	0	0	0	5600	Wales_N.AG	5151	Ireland_MN.SG
I5359	PB1794	10.0288	10.0288	1	0	0	0	0	0	0	5600	Wales_N.AG	5486	Ireland_MN.SG
I5359	PB443	10.6222	10.6222	1	0	0	0	0	0	0	5600	Wales_N.AG	5474	Ireland_MN.SG
I5359	PB768	10.061	19.6959	2	0	0	0	0	0	0	5600	Wales_N.AG	5475	Ireland_MN.SG
I5359	PN02	8.5458	16.6725	2	0	0	0	0	0	0	5600	Wales_N.AG	5546	Ireland_EN_MN.SG
I5359	PN03	8.6924	8.6924	1	0	0	0	0	0	0	5600	Wales_N.AG	5460	Ireland_MN.SG
I5359	PN05	15.5915	38.2049	3	29.9212	2	0	0	0	0	5600	Wales_N.AG	5729	Ireland_EN.SG
I5359	PN16	11.1204	20.1352	2	0	0	0	0	0	0	5600	Wales_N.AG	5442	Ireland_MN.SG
I5359	N20	9.77701	9.77701	1	0	0	0	0	0	0	5600	Wales_N.AG	5467	Poland_TRB.SG
I5359	prs002	10.1778	10.1778	1	0	0	0	0	0	0	5600	Wales_N.AG	5665	Ireland_Megalithic.SG
I5359	prs016	9.4159	17.93	2	0	0	0	0	0	0	5600	Wales_N.AG	5539	Ireland_Megalithic.SG
I5359	611	8.3599	8.3599	1	0	0	0	0	0	0	5600	Wales_N.AG	5418	England_Trumpington_N.SG
I5359	I21390	10.0772	10.0772	1	0	0	0	0	0	0	5600	Wales_N.AG	5630	England_N_Megalithic.AG
I5359	I30300	10.3834	20.431	2	0	0	0	0	0	0	5600	Wales_N.AG	5575	England_N_Megalithic.TW
I5359	I12439	9.338	26.4828	3	0	0	0	0	0	0	5600	Wales_N.AG	5600	England_N_Megalithic.AG
I5359	I20818	9.6326	18.4729	2	0	0	0	0	0	0	5600	Wales_N.AG	5545	England_N_Megalithic.TW
I5359	I30293	10.0113	10.0113	1	0	0	0	0	0	0	5600	Wales_N.AG	5575	England_N_Megalithic.TW
I5359	I30299	14.5844	24.9535	2	14.5844	1	0	0	0	0	5600	Wales_N.AG	5535	England_N_Megalithic_son.I30300.son.I30302.brother.I12440.TW
I5359	I30301	13.2907	13.2907	1	13.2907	1	0	0	0	0	5600	Wales_N.AG	5575	England_N_Megalithic.TW
I5359	I13890	8.0805	8.0805	1	0	0	0	0	0	0	5600	Wales_N.AG	5600	England_N_Megalithic.TW
I5359	I13898	8.0247	8.0247	1	0	0	0	0	0	0	5600	Wales_N.AG	5569	England_N_Megalithic_son.I30334.TW
I5359	I13899	9.1569	9.1569	1	0	0	0	0	0	0	5600	Wales_N.AG	5600	England_N_Megalithic.TW
I5359	I20821	8.2944	8.2944	1	0	0	0	0	0	0	5600	Wales_N.AG	5486	England_N_Megalithic.TW
I5359	I12437	10.7769	20.7552	2	0	0	0	0	0	0	5600	Wales_N.AG	5600	England_N_Megalithic_father.I13888.father.I21393.father.I21389.father.I30304.son.I30334.son.I30300.AG
I5359	I21388	8.0798	8.0798	1	0	0	0	0	0	0	5600	Wales_N.AG	5657	England_N_Megalithic_son.I30300.son.I21390.TW
I5359	I21389	12.1811	39.4344	4	12.1811	1	0	0	0	0	5600	Wales_N.AG	5585	England_N_Megalithic.TW
I5359	I21393	10.5516	10.5516	1	0	0	0	0	0	0	5600	Wales_N.AG	5600	England_N_Megalithic.TW
I5359	NEO625	8.0154	8.0154	1	0	0	0	0	0	0	5600	Wales_N.AG	5138	Great_Britain_Orkney_N_father.NEO624.SG
I5359	NEO847	9.3658	9.3658	1	0	0	0	0	0	0	5600	Wales_N.AG	5416	Great_Britain_Gloucestershire_N.SG
I5359	HUN001	9.2296	9.2296	1	0	0	0	0	0	0	5600	Wales_N.AG	1566	Hungary_Hun_oEastAsian.AG
I5359	KH180059	8.5436	8.5436	1	0	0	0	0	0	0	5600	Wales_N.AG	5084	Germany_Altendorf
I5359	KH180135_KH180136	12.7919	12.7919	1	12.7919	1	0	0	0	0	5600	Wales_N.AG	5182	Germany_Altendorf
I5359	KH180075	8.1253	8.1253	1	0	0	0	0	0	0	5600	Wales_N.AG	5150	Germany_Warburg
I5359	KH180090	8.9228	8.9228	1	0	0	0	0	0	0	5600	Wales_N.AG	5150	Germany_Warburg
I5359	KH201256	10.7436	10.7436	1	0	0	0	0	0	0	5600	Wales_N.AG	5150	Germany_Warburg
I5366	I2636	8.8123	8.8123	1	0	0	0	0	0	0	5516	England_N.AG	5397	Scotland_N.AG
I5366	I6753	11.3998	19.5088	2	0	0	0	0	0	0	5516	England_N.AG	5305	England_N.AG
I5366	I6759	12.4661	12.4661	1	12.4661	1	0	0	0	0	5516	England_N.AG	5527	England_N.AG
I5366	I6761	8.2491	8.2491	1	0	0	0	0	0	0	5516	England_N.AG	5525	England_N.AG
I5366	I6755	10.7442	20.7581	2	0	0	0	0	0	0	5516	England_N.AG	5528	England_N.AG
I5366	I6762	19.6483	19.6483	1	19.6483	1	19.6483	1	0	0	5516	England_N.AG	5700	England_N.AG
I5366	ANN1	8.7455	16.9234	2	0	0	0	0	0	0	5516	England_N.AG	5405	Ireland_MN.SG
I5366	ASH3	8.0532	8.0532	1	0	0	0	0	0	0	5516	England_N.AG	5609	Ireland_EN_MN.SG
I5366	CAK530	8.6355	8.6355	1	0	0	0	0	0	0	5516	England_N.AG	4711	Ireland_LN.SG
I5366	CH448	11.0694	11.0694	1	0	0	0	0	0	0	5516	England_N.AG	5517	Ireland_MN.SG
I5366	GNM1076	8.1373	8.1373	1	0	0	0	0	0	0	5516	England_N.AG	5135	Ireland_MN.SG
I5366	NGZ1	9.3046	9.3046	1	0	0	0	0	0	0	5516	England_N.AG	5024	Ireland_MN.SG
I5366	PB1327	8.8815	8.8815	1	0	0	0	0	0	0	5516	England_N.AG	5407	Ireland_MN.SG
I5366	PB186	9.3099	9.3099	1	0	0	0	0	0	0	5516	England_N.AG	5393	Ireland_MN.SG
I5366	PB2031	13.8018	42.4981	4	13.8018	1	0	0	0	0	5516	England_N.AG	5431	Ireland_MN.SG
I5366	PB675	8.179	8.179	1	0	0	0	0	0	0	5516	England_N.AG	5171	Ireland_MN.SG
I5366	PB768	10.2244	18.7631	2	0	0	0	0	0	0	5516	England_N.AG	5475	Ireland_MN.SG
I5366	PN02	8.1552	8.1552	1	0	0	0	0	0	0	5516	England_N.AG	5546	Ireland_EN_MN.SG
I5366	PN03	27.202	27.202	1	27.202	1	27.202	1	27.202	1	5516	England_N.AG	5460	Ireland_MN.SG
I5366	PN04	10.6418	10.6418	1	0	0	0	0	0	0	5516	England_N.AG	5742	Ireland_EN.SG
I5366	PN05	8.0791	8.0791	1	0	0	0	0	0	0	5516	England_N.AG	5729	Ireland_EN.SG
I5366	PN107	9.43071	9.43071	1	0	0	0	0	0	0	5516	England_N.AG	5705	Ireland_EN.SG
I5366	PN10_PN113	14.269	14.269	1	14.269	1	0	0	0	0	5516	England_N.AG	5746	Ireland_EN.SG
I5366	PN16	9.6433	18.0674	2	0	0	0	0	0	0	5516	England_N.AG	5442	Ireland_MN.SG
I5366	SEC004	8.43451	8.43451	1	0	0	0	0	0	0	5516	England_N.AG	4337	Italy_Sardinia_LateC.AG
I5366	ans017	13.9008	13.9008	1	13.9008	1	0	0	0	0	5516	England_N.AG	5053	Sweden_Ansarve_Megalithic.SG
I5366	613	18.5038	18.5038	1	18.5038	1	18.5038	1	0	0	5516	England_N.AG	5639	England_Trumpington_N_brother.TRPTN_611.SG
I5366	I13889	9.4969	9.4969	1	0	0	0	0	0	0	5516	England_N.AG	5624	England_N_Megalithic.AG
I5366	I13892	12.0729	12.0729	1	12.0729	1	0	0	0	0	5516	England_N.AG	5677	England_N_Megalithic.AG
I5366	I14326	8.5239	8.5239	1	0	0	0	0	0	0	5516	England_N.AG	4908	England_N.AG
I5366	I15030	8.0573	8.0573	1	0	0	0	0	0	0	5516	England_N.AG	5700	France_N.AG
I5366	I12439	9.4192	9.4192	1	0	0	0	0	0	0	5516	England_N.AG	5600	England_N_Megalithic.AG
I5366	I13893	34.7353	59.0912	3	49.454	2	34.7353	1	34.7353	1	5516	England_N.AG	5517	England_N_Megalithic.AG
I5366	I13896	8.1714	8.1714	1	0	0	0	0	0	0	5516	England_N.AG	5486	England_N_Megalithic_sister.I21395.daughter.I30332.AG
I5366	I20818	13.2849	31.2268	3	13.2849	1	0	0	0	0	5516	England_N.AG	5545	England_N_Megalithic.TW
I5366	I30293	8.2012	8.2012	1	0	0	0	0	0	0	5516	England_N.AG	5575	England_N_Megalithic.TW
I5366	I30299	8.76421	8.76421	1	0	0	0	0	0	0	5516	England_N.AG	5535	England_N_Megalithic_son.I30300.son.I30302.brother.I12440.TW
I5366	I30301	11.2089	11.2089	1	0	0	0	0	0	0	5516	England_N.AG	5575	England_N_Megalithic.TW
I5366	I13897	15.1328	29.8615	2	29.8615	2	0	0	0	0	5516	England_N.AG	5600	England_N_Megalithic_lc.TW
I5366	I13898	9.1239	9.1239	1	0	0	0	0	0	0	5516	England_N.AG	5569	England_N_Megalithic_son.I30334.TW
I5366	I21388	8.3035	8.3035	1	0	0	0	0	0	0	5516	England_N.AG	5657	England_N_Megalithic_son.I30300.son.I21390.TW
I5366	I21389	8.0673	8.0673	1	0	0	0	0	0	0	5516	England_N.AG	5585	England_N_Megalithic.TW
I5366	NEO624	8.8063	8.8063	1	0	0	0	0	0	0	5516	England_N.AG	4903	Great_Britain_Orkney_N.SG
I5366	NEO847	17.7013	17.7013	1	17.7013	1	17.7013	1	0	0	5516	England_N.AG	5416	Great_Britain_Gloucestershire_N.SG
I5366	ROS005	8.3379	8.3379	1	0	0	0	0	0	0	5516	England_N.AG	4955	Sweden_Rossberga_N.SG
I5366	KH180139_KH180140	8.5849	8.5849	1	0	0	0	0	0	0	5516	England_N.AG	3618	Germany_Altendorf
I5366	KH210852	8.737	8.737	1	0	0	0	0	0	0	5516	England_N.AG	5225	Germany_Sorsum
I5366	KH210914	8.3584	8.3584	1	0	0	0	0	0	0	5516	England_N.AG	5225	Germany_Sorsum
I5366	KH210931	8.905	17.4255	2	0	0	0	0	0	0	5516	England_N.AG	5225	Germany_Sorsum
I5366	KH200229	9.9562	9.9562	1	0	0	0	0	0	0	5516	England_N.AG	5150	Germany_Warburg
I5366	KH210992	8.16669	8.16669	1	0	0	0	0	0	0	5516	England_N.AG	5000	Germany_Zuschen
I5367	I5379	14.3218	14.3218	1	14.3218	1	0	0	0	0	4312	Scotland_BellBeaker.AG	4333	England_BellBeaker_highEEF.AG
I5367	I6531	19.0374	29.4053	2	19.0374	1	19.0374	1	0	0	4312	Scotland_BellBeaker.AG	4113	Poland_ChopiceVeseleCulture.AG
I5367	I6579	9.4082	9.4082	1	0	0	0	0	0	0	4312	Scotland_BellBeaker.AG	4155	Poland_EBA.AG
I5367	I6583	8.78589	17.288	2	0	0	0	0	0	0	4312	Scotland_BellBeaker.AG	4138	Poland_BellBeaker.AG
I5367	I6590	8.67079	8.67079	1	0	0	0	0	0	0	4312	Scotland_BellBeaker.AG	4200	Germany_BellBeaker.AG
I5367	I6591	12.5458	39.4879	4	12.5458	1	0	0	0	0	4312	Scotland_BellBeaker.AG	4200	Germany_BellBeaker.AG
I5367	I0118	9.0041	9.0041	1	0	0	0	0	0	0	4312	Scotland_BellBeaker.AG	4325	Germany_LN_Alberstedt.AG
I5367	I11443	8.8812	8.8812	1	0	0	0	0	0	0	4312	Scotland_BellBeaker.AG	4090	Italy_Sicily_EBA_o2.AG
I5367	I2445	8.7727	8.7727	1	0	0	0	0	0	0	4312	Scotland_BellBeaker.AG	4048	England_BellBeaker.AG
I5367	I2450	9.57689	18.3927	2	0	0	0	0	0	0	4312	Scotland_BellBeaker.AG	4248	England_BellBeaker.AG
I5367	I2454	13.9801	13.9801	1	13.9801	1	0	0	0	0	4312	Scotland_BellBeaker.AG	4042	England_BellBeaker_lowEEF.AG
I5367	I2457	16.7435	41.763	3	31.8463	2	16.7435	1	0	0	4312	Scotland_BellBeaker.AG	4056	England_C_EBA.AG
I5367	I2597	18.1167	28.1253	2	18.1167	1	18.1167	1	0	0	4312	Scotland_BellBeaker.AG	4080	England_C_EBA.AG
I5367	I2604	11.5087	11.5087	1	0	0	0	0	0	0	4312	Scotland_BellBeaker.AG	4073	England_C_EBA.AG
I5367	I4074	12.269	42.875	4	24.5017	2	0	0	0	0	4312	Scotland_BellBeaker.AG	4030	Netherlands_LNB_BellBeaker.AG
I5367	I4885	8.0575	8.0575	1	0	0	0	0	0	0	4312	Scotland_BellBeaker.AG	4170	Czechia_BellBeaker.AG
I5367	I4886	8.0124	8.0124	1	0	0	0	0	0	0	4312	Scotland_BellBeaker.AG	4088	Czechia_BellBeaker.AG
I5367	I4889	10.886	20.4629	2	0	0	0	0	0	0	4312	Scotland_BellBeaker.AG	4131	Czechia_BellBeaker.AG
I5367	I5514	11.4987	11.4987	1	0	0	0	0	0	0	4312	Scotland_BellBeaker.AG	4155	Czechia_BellBeaker.AG
I5367	I5833	9.6152	9.6152	1	0	0	0	0	0	0	4312	Scotland_BellBeaker.AG	4200	Germany_BellBeaker.AG
I5367	I5835	9.3327	18.3626	2	0	0	0	0	0	0	4312	Scotland_BellBeaker.AG	4200	Germany_BellBeaker_father.or.son.I1533.AG
I5367	I6695	13.6194	13.6194	1	13.6194	1	0	0	0	0	4312	Scotland_BellBeaker.AG	4575	Czechia_EBA_CordedWare.AG
I5367	I6775	13.9796	22.6463	2	13.9796	1	0	0	0	0	4312	Scotland_BellBeaker.AG	4150	England_BellBeaker.AG
I5367	I6777	13.4767	13.4767	1	13.4767	1	0	0	0	0	4312	Scotland_BellBeaker.AG	4050	England_C_EBA.AG
I5367	I7198	9.6097	9.6097	1	0	0	0	0	0	0	4312	Scotland_BellBeaker.AG	4026	Czechia_EBA.AG
I5367	I7199	10.0284	19.3642	2	0	0	0	0	0	0	4312	Scotland_BellBeaker.AG	4039	Czechia_EBA.AG
I5367	I7208	10.2868	10.2868	1	0	0	0	0	0	0	4312	Scotland_BellBeaker.AG	4324	Czechia_EBA_CordedWare.AG
I5367	I7210	11.8441	30.9041	3	0	0	0	0	0	0	4312	Scotland_BellBeaker.AG	4071	Czechia_BellBeaker_father.or.son.I7212.AG
I5367	I7212	11.6573	30.0855	3	0	0	0	0	0	0	4312	Scotland_BellBeaker.AG	4247	Czechia_BellBeaker.AG
I5367	I7214	9.0244	9.0244	1	0	0	0	0	0	0	4312	Scotland_BellBeaker.AG	4200	Czechia_BellBeaker.AG
I5367	I7275	8.3058	8.3058	1	0	0	0	0	0	0	4312	Scotland_BellBeaker.AG	4200	Czechia_BA_BellBeaker.AG
I5367	I7276	10.1359	10.1359	1	0	0	0	0	0	0	4312	Scotland_BellBeaker.AG	4200	Czechia_BA_BellBeaker.AG
I5367	I7278	10.9976	10.9976	1	0	0	0	0	0	0	4312	Scotland_BellBeaker.AG	4333	Czechia_BA_BellBeaker.AG
I5367	I7282	8.67579	8.67579	1	0	0	0	0	0	0	4312	Scotland_BellBeaker.AG	4200	Czechia_BellBeaker.AG
I5367	I7289	10.5323	30.8382	3	0	0	0	0	0	0	4312	Scotland_BellBeaker.AG	4289	Czechia_BellBeaker_sibling.I7214.AG
I5367	I7290	10.9448	10.9448	1	0	0	0	0	0	0	4312	Scotland_BellBeaker.AG	4200	Czechia_BellBeaker.AG
I5367	I0059	8.4671	8.4671	1	0	0	0	0	0	0	4312	Scotland_BellBeaker.AG	4179	Germany_BenzigerodeHeimburg_LN.AG
I5367	I0108	21.2411	21.2411	1	21.2411	1	21.2411	1	21.2411	1	4312	Scotland_BellBeaker.AG	4399	Germany_BellBeaker.AG
I5367	I0112	11.4231	11.4231	1	0	0	0	0	0	0	4312	Scotland_BellBeaker.AG	4224	Germany_BellBeaker.AG
I5367	I0114	9.5853	17.6213	2	0	0	0	0	0	0	4312	Scotland_BellBeaker.AG	4002	Germany_EBA_Unetice_brother.I0117.AG
I5367	I0117	10.2228	18.2588	2	0	0	0	0	0	0	4312	Scotland_BellBeaker.AG	4092	Germany_EBA_Unetice.AG
I5367	UNTA58_68Sk2	16.1306	16.1306	1	16.1306	1	16.1306	1	0	0	4312	Scotland_BellBeaker.AG	4347	Germany_Lech_BellBeaker_possible.contam.AG
I5367	CAH010	9.0373	9.0373	1	0	0	0	0	0	0	4312	Scotland_BellBeaker.AG	4275	Czechia_EBA_CordedWare.AG
I5367	HOP003	8.55589	8.55589	1	0	0	0	0	0	0	4312	Scotland_BellBeaker.AG	4250	Czechia_BellBeaker.AG
I5367	KO1004	9.66901	17.8665	2	0	0	0	0	0	0	4312	Scotland_BellBeaker.AG	4166	Czechia_BellBeaker.AG
I5367	OHR002	17.1894	34.9953	3	17.1894	1	17.1894	1	0	0	4312	Scotland_BellBeaker.AG	4477	Czechia_EBA_CordedWare.AG
I5367	PMI001	8.2388	16.357	2	0	0	0	0	0	0	4312	Scotland_BellBeaker.AG	4096	Czechia_EBA_Unetice.AG
I5367	PNL002	8.506	8.506	1	0	0	0	0	0	0	4312	Scotland_BellBeaker.AG	4653	Czechia_EBA_CordedWare.AG
I5367	ROU007	8.9578	8.9578	1	0	0	0	0	0	0	4312	Scotland_BellBeaker.AG	4000	Czechia_EBA_Unetice.AG
I5367	STD001	12.8272	22.3148	2	12.8272	1	0	0	0	0	4312	Scotland_BellBeaker.AG	4500	Czechia_EBA_CordedWare.AG
I5367	STD002	11.9252	11.9252	1	0	0	0	0	0	0	4312	Scotland_BellBeaker.AG	4720	Czechia_EBA_CordedWare.AG
I5367	TRM003	9.94558	9.94558	1	0	0	0	0	0	0	4312	Scotland_BellBeaker.AG	4620	Czechia_EBA_CordedWare.AG
I5367	TRM006	25.5715	25.5715	1	25.5715	1	25.5715	1	25.5715	1	4312	Scotland_BellBeaker.AG	4644	Czechia_EBA_CordedWare.AG
I5367	VLI010	8.6598	8.6598	1	0	0	0	0	0	0	4312	Scotland_BellBeaker.AG	4483	Czechia_EBA_CordedWare.AG
I5367	VLI016	8.4996	8.4996	1	0	0	0	0	0	0	4312	Scotland_BellBeaker.AG	4345	Czechia_EBA_CordedWare.AG
I5367	VLI017	9.9299	9.9299	1	0	0	0	0	0	0	4312	Scotland_BellBeaker.AG	4336	Czechia_EBA_CordedWare.AG
I5367	VLI020	8.557	8.557	1	0	0	0	0	0	0	4312	Scotland_BellBeaker.AG	4446	Czechia_EBA_CordedWare.AG
I5367	VLI061	9.1943	9.1943	1	0	0	0	0	0	0	4312	Scotland_BellBeaker.AG	4000	Czechia_EBA_Unetice.AG
I5367	N18	9.9465	9.9465	1	0	0	0	0	0	0	4312	Scotland_BellBeaker.AG	5459	Poland_TRB.SG
I5367	N49	8.04039	8.04039	1	0	0	0	0	0	0	4312	Scotland_BellBeaker.AG	4375	Poland_CordedWare_1.SG
I5367	MX188	12.0502	12.0502	1	12.0502	1	0	0	0	0	4312	Scotland_BellBeaker.AG	4399	Switzerland_EBA_2.AG
I5367	pcw040	22.9729	22.9729	1	22.9729	1	22.9729	1	22.9729	1	4312	Scotland_BellBeaker.AG	4400	Poland_Southeast_CordedWare.SG
I5367	pcw070	11.7705	11.7705	1	0	0	0	0	0	0	4312	Scotland_BellBeaker.AG	4321	Poland_Southeast_CordedWare.SG
I5367	ber1	10.7412	10.7412	1	0	0	0	0	0	0	4312	Scotland_BellBeaker.AG	4483	Sweden_BAC.SG
I5367	poz81	11.7302	11.7302	1	0	0	0	0	0	0	4312	Scotland_BellBeaker.AG	4702	Poland_CordedWare.SG
I5367	Plinkaigalis242	10.3238	37.9781	4	0	0	0	0	0	0	4312	Scotland_BellBeaker.AG	4842	Lithuania_LN.AG
I5367	RISE1162	9.1205	9.1205	1	0	0	0	0	0	0	4312	Scotland_BellBeaker.AG	4765	Poland_Koszyce_GlobularAmphora_daughter.RISE1170.sister.RISE1164.SG
I5367	RISE1170	9.1326	9.1326	1	0	0	0	0	0	0	4312	Scotland_BellBeaker.AG	4754	Poland_Koszyce_GlobularAmphora.SG
I5367	GBVPK	11.2131	21.0142	2	0	0	0	0	0	0	4312	Scotland_BellBeaker.AG	4336	France_LaClape_LN_EMBA_BellBeakerPossible.SG
I5367	ELT006	9.2004	9.2004	1	0	0	0	0	0	0	4312	Scotland_BellBeaker.AG	5809	Spain_MLN.AG
I5367	RISE94	10.2193	18.8771	2	0	0	0	0	0	0	4312	Scotland_BellBeaker.AG	4487	Sweden_BattleAxe.SG
I5367	I13028	11.3134	30.7163	3	0	0	0	0	0	0	4312	Scotland_BellBeaker.AG	4250	Netherlands_LNB_BellBeaker.AG
I5367	I13467	10.7271	20.5226	2	0	0	0	0	0	0	4312	Scotland_BellBeaker.AG	4289	Czechia_EBA_CordedWare_2_dup.I13467.AG
I5367	I16424	11.3476	19.9037	2	0	0	0	0	0	0	4312	Scotland_BellBeaker.AG	4106	England_C_EBA.AG
I5367	I20997	8.8728	8.8728	1	0	0	0	0	0	0	4312	Scotland_BellBeaker.AG	4075	England_C_EBA.AG
I5367	I27380	9.2009	9.2009	1	0	0	0	0	0	0	4312	Scotland_BellBeaker.AG	4228	England_EBA_BellBeaker.AG
I5367	NEO51	8.3004	8.3004	1	0	0	0	0	0	0	4312	Scotland_BellBeaker.AG	4364	Sweden_MN_BAC.SG
I5367	NEO92	8.06279	8.06279	1	0	0	0	0	0	0	4312	Scotland_BellBeaker.AG	4173	Denmark_SouthScandinavia_LN.SG
I5367	I2443	9.7712	9.7712	1	0	0	0	0	0	0	4312	Scotland_BellBeaker.AG	4091	England_BellBeaker.AG
I5367	FRA202	8.61211	8.61211	1	0	0	0	0	0	0	4312	Scotland_BellBeaker.AG	4348	Sweden_Fralsegarden_Steppe1.SG
I5379	I6583	32.9991	50.9163	3	32.9991	1	32.9991	1	32.9991	1	4333	England_BellBeaker_highEEF.AG	4138	Poland_BellBeaker.AG
I5379	I6590	11.0046	11.0046	1	0	0	0	0	0	0	4333	England_BellBeaker_highEEF.AG	4200	Germany_BellBeaker.AG
I5379	I6591	10.767	19.8934	2	0	0	0	0	0	0	4333	England_BellBeaker_highEEF.AG	4200	Germany_BellBeaker.AG
I5379	I0104	11.2109	11.2109	1	0	0	0	0	0	0	4333	England_BellBeaker_highEEF.AG	4358	Germany_CordedWare.AG
I5379	I0118	8.9675	8.9675	1	0	0	0	0	0	0	4333	England_BellBeaker_highEEF.AG	4325	Germany_LN_Alberstedt.AG
I5379	I2445	11.5047	20.1035	2	0	0	0	0	0	0	4333	England_BellBeaker_highEEF.AG	4048	England_BellBeaker.AG
I5379	I2450	10.4314	10.4314	1	0	0	0	0	0	0	4333	England_BellBeaker_highEEF.AG	4248	England_BellBeaker.AG
I5379	I2597	8.3819	8.3819	1	0	0	0	0	0	0	4333	England_BellBeaker_highEEF.AG	4080	England_C_EBA.AG
I5379	I2604	39.9834	88.1591	6	52.5	2	39.9834	1	39.9834	1	4333	England_BellBeaker_highEEF.AG	4073	England_C_EBA.AG
I5379	I2786	9.29711	9.29711	1	0	0	0	0	0	0	4333	England_BellBeaker_highEEF.AG	4270	Hungary_EBA_BellBeaker.AG
I5379	I4074	8.4513	8.4513	1	0	0	0	0	0	0	4333	England_BellBeaker_highEEF.AG	4030	Netherlands_LNB_BellBeaker.AG
I5379	I4229	8.1782	8.1782	1	0	0	0	0	0	0	4333	England_BellBeaker_highEEF.AG	4158	Portugal_LN_C.AG
I5379	I4889	8.3678	8.3678	1	0	0	0	0	0	0	4333	England_BellBeaker_highEEF.AG	4131	Czechia_BellBeaker.AG
I5379	I5748	15.4671	15.4671	1	15.4671	1	0	0	0	0	4333	England_BellBeaker_highEEF.AG	4383	Netherlands_LNB_BellBeaker.AG
I5379	I5834	14.8251	14.8251	1	14.8251	1	0	0	0	0	4333	England_BellBeaker_highEEF.AG	4200	Germany_BellBeaker.AG
I5379	I6696	17.8221	17.8221	1	17.8221	1	17.8221	1	0	0	4333	England_BellBeaker_highEEF.AG	4575	Czechia_EBA_CordedWare.SG
I5379	I6751	8.35279	8.35279	1	0	0	0	0	0	0	4333	England_BellBeaker_highEEF.AG	5650	England_N.AG
I5379	I6774	10.6352	18.6927	2	0	0	0	0	0	0	4333	England_BellBeaker_highEEF.AG	4121	England_BellBeaker_lowEEF.AG
I5379	I7199	10.8157	10.8157	1	0	0	0	0	0	0	4333	England_BellBeaker_highEEF.AG	4039	Czechia_EBA.AG
I5379	I7200	12.4673	12.4673	1	12.4673	1	0	0	0	0	4333	England_BellBeaker_highEEF.AG	4250	Czechia_EBA.AG
I5379	I7207	10.1243	10.1243	1	0	0	0	0	0	0	4333	England_BellBeaker_highEEF.AG	4370	Czechia_EBA_CordedWare.AG
I5379	I7209	11.8505	11.8505	1	0	0	0	0	0	0	4333	England_BellBeaker_highEEF.AG	4269	Czechia_EBA_CordedWare.AG
I5379	I7210	18.5128	18.5128	1	18.5128	1	18.5128	1	0	0	4333	England_BellBeaker_highEEF.AG	4071	Czechia_BellBeaker_father.or.son.I7212.AG
I5379	I7211	10.2859	10.2859	1	0	0	0	0	0	0	4333	England_BellBeaker_highEEF.AG	4183	Czechia_BellBeaker.AG
I5379	I7212	18.4303	34.6764	2	34.6764	2	34.6764	2	0	0	4333	England_BellBeaker_highEEF.AG	4247	Czechia_BellBeaker.AG
I5379	I7214	8.5264	8.5264	1	0	0	0	0	0	0	4333	England_BellBeaker_highEEF.AG	4200	Czechia_BellBeaker.AG
I5379	I7249	8.2695	8.2695	1	0	0	0	0	0	0	4333	England_BellBeaker_highEEF.AG	4011	Czechia_BA_BellBeaker.AG
I5379	I7251	8.3076	8.3076	1	0	0	0	0	0	0	4333	England_BellBeaker_highEEF.AG	4200	Czechia_BA_BellBeaker.AG
I5379	I7280	8.8314	8.8314	1	0	0	0	0	0	0	4333	England_BellBeaker_highEEF.AG	4200	Czechia_EBA_CordedWare.AG
I5379	I7281	16.5853	16.5853	1	16.5853	1	16.5853	1	0	0	4333	England_BellBeaker_highEEF.AG	4194	Czechia_BellBeaker.AG
I5379	I0059	8.9028	8.9028	1	0	0	0	0	0	0	4333	England_BellBeaker_highEEF.AG	4179	Germany_BenzigerodeHeimburg_LN.AG
I5379	I0108	12.1576	12.1576	1	12.1576	1	0	0	0	0	4333	England_BellBeaker_highEEF.AG	4399	Germany_BellBeaker.AG
I5379	I0112	20.0442	28.3155	2	20.0442	1	20.0442	1	20.0442	1	4333	England_BellBeaker_highEEF.AG	4224	Germany_BellBeaker.AG
I5379	I0114	8.1471	8.1471	1	0	0	0	0	0	0	4333	England_BellBeaker_highEEF.AG	4002	Germany_EBA_Unetice_brother.I0117.AG
I5379	I0461	9.0042	9.0042	1	0	0	0	0	0	0	4333	England_BellBeaker_highEEF.AG	4241	Spain_C_oSteppe.AG
I5379	UNTA58_68Sk2	11.1011	11.1011	1	0	0	0	0	0	0	4333	England_BellBeaker_highEEF.AG	4347	Germany_Lech_BellBeaker_possible.contam.AG
I5379	BNL005	9.5932	9.5932	1	0	0	0	0	0	0	4333	England_BellBeaker_highEEF.AG	4084	Czechia_EBA_Unetice.AG
I5379	CAH010	14.558	24.3225	2	14.558	1	0	0	0	0	4333	England_BellBeaker_highEEF.AG	4275	Czechia_EBA_CordedWare.AG
I5379	DRO001	9.3914	9.3914	1	0	0	0	0	0	0	4333	England_BellBeaker_highEEF.AG	4697	Czechia_EBA_CordedWare.AG
I5379	HOP001	10.5295	10.5295	1	0	0	0	0	0	0	4333	England_BellBeaker_highEEF.AG	4240	Czechia_BellBeaker.AG
I5379	KO1003	9.4968	9.4968	1	0	0	0	0	0	0	4333	England_BellBeaker_highEEF.AG	4160	Czechia_BellBeaker.AG
I5379	KO1004	11.7245	23.3634	2	0	0	0	0	0	0	4333	England_BellBeaker_highEEF.AG	4166	Czechia_BellBeaker.AG
I5379	PNL002	20.9921	20.9921	1	20.9921	1	20.9921	1	20.9921	1	4333	England_BellBeaker_highEEF.AG	4653	Czechia_EBA_CordedWare.AG
I5379	ROU007	10.3425	10.3425	1	0	0	0	0	0	0	4333	England_BellBeaker_highEEF.AG	4000	Czechia_EBA_Unetice.AG
I5379	TRM003	8.0545	8.0545	1	0	0	0	0	0	0	4333	England_BellBeaker_highEEF.AG	4620	Czechia_EBA_CordedWare.AG
I5379	VLI007	9.6704	9.6704	1	0	0	0	0	0	0	4333	England_BellBeaker_highEEF.AG	4739	Czechia_EBA_CordedWare.AG
I5379	VLI016	8.5461	8.5461	1	0	0	0	0	0	0	4333	England_BellBeaker_highEEF.AG	4345	Czechia_EBA_CordedWare.AG
I5379	VLI017	9.20451	9.20451	1	0	0	0	0	0	0	4333	England_BellBeaker_highEEF.AG	4336	Czechia_EBA_CordedWare.AG
I5379	VLI020	11.7248	20.4651	2	0	0	0	0	0	0	4333	England_BellBeaker_highEEF.AG	4446	Czechia_EBA_CordedWare.AG
I5379	VLI061	11.913	11.913	1	0	0	0	0	0	0	4333	England_BellBeaker_highEEF.AG	4000	Czechia_EBA_Unetice.AG
I5379	VLI067	11.364	11.364	1	0	0	0	0	0	0	4333	England_BellBeaker_highEEF.AG	4718	Czechia_EBA_CordedWare.AG
I5379	VLI076	11.5689	31.0581	3	0	0	0	0	0	0	4333	England_BellBeaker_highEEF.AG	4906	Czechia_EBA_CordedWare.AG
I5379	VLI092	13.052	25.0139	2	13.052	1	0	0	0	0	4333	England_BellBeaker_highEEF.AG	4719	Czechia_EBA_CordedWare.AG
I5379	N45	8.804	8.804	1	0	0	0	0	0	0	4333	England_BellBeaker_highEEF.AG	4375	Poland_CordedWare_3.SG
I5379	pcw040	11.9417	11.9417	1	0	0	0	0	0	0	4333	England_BellBeaker_highEEF.AG	4400	Poland_Southeast_CordedWare.SG
I5379	pcw260	8.8028	8.8028	1	0	0	0	0	0	0	4333	England_BellBeaker_highEEF.AG	4237	Poland_Southeast_BellBeaker.SG
I5379	ber1	8.9795	17.1027	2	0	0	0	0	0	0	4333	England_BellBeaker_highEEF.AG	4483	Sweden_BAC.SG
I5379	oll007	8.8887	8.8887	1	0	0	0	0	0	0	4333	England_BellBeaker_highEEF.AG	4617	Sweden_BAC.SG
I5379	poz81	12.2932	20.3771	2	12.2932	1	0	0	0	0	4333	England_BellBeaker_highEEF.AG	4702	Poland_CordedWare.SG
I5379	Plinkaigalis242	8.4979	8.4979	1	0	0	0	0	0	0	4333	England_BellBeaker_highEEF.AG	4842	Lithuania_LN.AG
I5379	611	8.5523	8.5523	1	0	0	0	0	0	0	4333	England_BellBeaker_highEEF.AG	5418	England_Trumpington_N.SG
I5379	RISE1170	8.1704	8.1704	1	0	0	0	0	0	0	4333	England_BellBeaker_highEEF.AG	4754	Poland_Koszyce_GlobularAmphora.SG
I5379	GBVPK	8.772	17.021	2	0	0	0	0	0	0	4333	England_BellBeaker_highEEF.AG	4336	France_LaClape_LN_EMBA_BellBeakerPossible.SG
I5379	I13467	8.788	8.788	1	0	0	0	0	0	0	4333	England_BellBeaker_highEEF.AG	4289	Czechia_EBA_CordedWare_2_dup.I13467.AG
I5379	I15028	8.9963	8.9963	1	0	0	0	0	0	0	4333	England_BellBeaker_highEEF.AG	4218	France_EBA.AG
I5379	I20997	8.1563	8.1563	1	0	0	0	0	0	0	4333	England_BellBeaker_highEEF.AG	4075	England_C_EBA.AG
I5379	I21390	13.4535	13.4535	1	13.4535	1	0	0	0	0	4333	England_BellBeaker_highEEF.AG	5630	England_N_Megalithic.AG
I5379	I27380	8.3987	8.3987	1	0	0	0	0	0	0	4333	England_BellBeaker_highEEF.AG	4228	England_EBA_BellBeaker.AG
I5379	I30301	8.0263	8.0263	1	0	0	0	0	0	0	4333	England_BellBeaker_highEEF.AG	5575	England_N_Megalithic.TW
I5379	I20821	8.8242	8.8242	1	0	0	0	0	0	0	4333	England_BellBeaker_highEEF.AG	5486	England_N_Megalithic.TW
I5379	I13895	9.3022	9.3022	1	0	0	0	0	0	0	4333	England_BellBeaker_highEEF.AG	5600	England_N_Megalithic_father.I20821.son.I21390.TW
I5379	NEO51	10.7554	10.7554	1	0	0	0	0	0	0	4333	England_BellBeaker_highEEF.AG	4364	Sweden_MN_BAC.SG
I5379	NEO92	8.6871	8.6871	1	0	0	0	0	0	0	4333	England_BellBeaker_highEEF.AG	4173	Denmark_SouthScandinavia_LN.SG
I5379	I2443	14.3332	25.0029	2	14.3332	1	0	0	0	0	4333	England_BellBeaker_highEEF.AG	4091	England_BellBeaker.AG
I5379	KH180068	9.83469	9.83469	1	0	0	0	0	0	0	4333	England_BellBeaker_highEEF.AG	5150	Germany_Warburg
I5379	KH200155	8.1117	8.1117	1	0	0	0	0	0	0	4333	England_BellBeaker_highEEF.AG	5150	Germany_Warburg
I5429	LugarCanto44	8.4204	8.4204	1	0	0	0	0	0	0	4866	Portugal_C.AG	5950	Portugal_MN.SG
I5429	2H10	8.4785	8.4785	1	0	0	0	0	0	0	4866	Portugal_C.AG	5165	France_MontAime_MLN.SG
I5429	I11248	9.2091	9.2091	1	0	0	0	0	0	0	4866	Portugal_C.AG	5050	Spain_MLN.AG
I5429	KH150625	8.0363	8.0363	1	0	0	0	0	0	0	4866	Portugal_C.AG	5250	Germany_Niedertiefenbach
I5429	KH150626	8.5841	8.5841	1	0	0	0	0	0	0	4866	Portugal_C.AG	5250	Germany_Niedertiefenbach
I5429	KH180059	8.177	8.177	1	0	0	0	0	0	0	4866	Portugal_C.AG	5084	Germany_Altendorf
I5429	KH170035_KH210851	8.77219	8.77219	1	0	0	0	0	0	0	4866	Portugal_C.AG	5225	Germany_Sorsum
I5429	KH210846	10.241	10.241	1	0	0	0	0	0	0	4866	Portugal_C.AG	5225	Germany_Sorsum
I5429	KH200155	8.0457	8.0457	1	0	0	0	0	0	0	4866	Portugal_C.AG	5150	Germany_Warburg
I5429	KH210991	8.5562	8.5562	1	0	0	0	0	0	0	4866	Portugal_C.AG	5000	Germany_Zuschen
I6531	I6579	9.3236	17.8259	2	0	0	0	0	0	0	4113	Poland_ChopiceVeseleCulture.AG	4155	Poland_EBA.AG
I6531	I6583	8.4235	8.4235	1	0	0	0	0	0	0	4113	Poland_ChopiceVeseleCulture.AG	4138	Poland_BellBeaker.AG
I6531	I0103	8.0553	8.0553	1	0	0	0	0	0	0	4113	Poland_ChopiceVeseleCulture.AG	4472	Germany_CordedWare.AG
I6531	I0104	8.3434	8.3434	1	0	0	0	0	0	0	4113	Poland_ChopiceVeseleCulture.AG	4358	Germany_CordedWare.AG
I6531	I0118	12.0342	31.4613	3	12.0342	1	0	0	0	0	4113	Poland_ChopiceVeseleCulture.AG	4325	Germany_LN_Alberstedt.AG
I6531	I2445	9.0751	9.0751	1	0	0	0	0	0	0	4113	Poland_ChopiceVeseleCulture.AG	4048	England_BellBeaker.AG
I6531	I2450	8.5365	8.5365	1	0	0	0	0	0	0	4113	Poland_ChopiceVeseleCulture.AG	4248	England_BellBeaker.AG
I6531	I2454	8.6205	8.6205	1	0	0	0	0	0	0	4113	Poland_ChopiceVeseleCulture.AG	4042	England_BellBeaker_lowEEF.AG
I6531	I2457	10.0526	10.0526	1	0	0	0	0	0	0	4113	Poland_ChopiceVeseleCulture.AG	4056	England_C_EBA.AG
I6531	I2604	8.3868	8.3868	1	0	0	0	0	0	0	4113	Poland_ChopiceVeseleCulture.AG	4073	England_C_EBA.AG
I6531	I4074	9.9059	9.9059	1	0	0	0	0	0	0	4113	Poland_ChopiceVeseleCulture.AG	4030	Netherlands_LNB_BellBeaker.AG
I6531	I4889	8.4977	8.4977	1	0	0	0	0	0	0	4113	Poland_ChopiceVeseleCulture.AG	4131	Czechia_BellBeaker.AG
I6531	I5512	8.1337	8.1337	1	0	0	0	0	0	0	4113	Poland_ChopiceVeseleCulture.AG	4250	England_BellBeaker.AG
I6531	I5834	10.4274	10.4274	1	0	0	0	0	0	0	4113	Poland_ChopiceVeseleCulture.AG	4200	Germany_BellBeaker.AG
I6531	I6695	13.7931	13.7931	1	13.7931	1	0	0	0	0	4113	Poland_ChopiceVeseleCulture.AG	4575	Czechia_EBA_CordedWare.AG
I6531	I6774	8.6316	17.0298	2	0	0	0	0	0	0	4113	Poland_ChopiceVeseleCulture.AG	4121	England_BellBeaker_lowEEF.AG
I6531	I6777	9.9205	9.9205	1	0	0	0	0	0	0	4113	Poland_ChopiceVeseleCulture.AG	4050	England_C_EBA.AG
I6531	I7199	9.3679	9.3679	1	0	0	0	0	0	0	4113	Poland_ChopiceVeseleCulture.AG	4039	Czechia_EBA.AG
I6531	I7208	12.5526	12.5526	1	12.5526	1	0	0	0	0	4113	Poland_ChopiceVeseleCulture.AG	4324	Czechia_EBA_CordedWare.AG
I6531	I7211	11.8383	20.3402	2	0	0	0	0	0	0	4113	Poland_ChopiceVeseleCulture.AG	4183	Czechia_BellBeaker.AG
I6531	I7212	10.58	10.58	1	0	0	0	0	0	0	4113	Poland_ChopiceVeseleCulture.AG	4247	Czechia_BellBeaker.AG
I6531	I7214	11.7081	21.0654	2	0	0	0	0	0	0	4113	Poland_ChopiceVeseleCulture.AG	4200	Czechia_BellBeaker.AG
I6531	I7275	8.21689	8.21689	1	0	0	0	0	0	0	4113	Poland_ChopiceVeseleCulture.AG	4200	Czechia_BA_BellBeaker.AG
I6531	I7278	8.1234	8.1234	1	0	0	0	0	0	0	4113	Poland_ChopiceVeseleCulture.AG	4333	Czechia_BA_BellBeaker.AG
I6531	I7280	14.2189	46.7977	4	14.2189	1	0	0	0	0	4113	Poland_ChopiceVeseleCulture.AG	4200	Czechia_EBA_CordedWare.AG
I6531	I7286	8.7089	8.7089	1	0	0	0	0	0	0	4113	Poland_ChopiceVeseleCulture.AG	4221	Czechia_BellBeaker.AG
I6531	I7289	9.6422	9.6422	1	0	0	0	0	0	0	4113	Poland_ChopiceVeseleCulture.AG	4289	Czechia_BellBeaker_sibling.I7214.AG
I6531	I7290	10.8411	10.8411	1	0	0	0	0	0	0	4113	Poland_ChopiceVeseleCulture.AG	4200	Czechia_BellBeaker.AG
I6531	I0108	13.0878	13.0878	1	13.0878	1	0	0	0	0	4113	Poland_ChopiceVeseleCulture.AG	4399	Germany_BellBeaker.AG
I6531	I0112	8.5021	8.5021	1	0	0	0	0	0	0	4113	Poland_ChopiceVeseleCulture.AG	4224	Germany_BellBeaker.AG
I6531	BNL005	14.9161	14.9161	1	14.9161	1	0	0	0	0	4113	Poland_ChopiceVeseleCulture.AG	4084	Czechia_EBA_Unetice.AG
I6531	KO1003	8.2426	8.2426	1	0	0	0	0	0	0	4113	Poland_ChopiceVeseleCulture.AG	4160	Czechia_BellBeaker.AG
I6531	KO1005	8.3586	8.3586	1	0	0	0	0	0	0	4113	Poland_ChopiceVeseleCulture.AG	4331	Czechia_BellBeaker.AG
I6531	KON004	8.1927	8.1927	1	0	0	0	0	0	0	4113	Poland_ChopiceVeseleCulture.AG	4398	Czechia_EBA_CordedWare.AG
I6531	PDA002	13.0634	22.5446	2	13.0634	1	0	0	0	0	4113	Poland_ChopiceVeseleCulture.AG	4057	Czechia_EBA_Unetice.AG
I6531	PMI001	8.7468	8.7468	1	0	0	0	0	0	0	4113	Poland_ChopiceVeseleCulture.AG	4096	Czechia_EBA_Unetice.AG
I6531	ROU007	8.5098	8.5098	1	0	0	0	0	0	0	4113	Poland_ChopiceVeseleCulture.AG	4000	Czechia_EBA_Unetice.AG
I6531	TRM003	10.5132	10.5132	1	0	0	0	0	0	0	4113	Poland_ChopiceVeseleCulture.AG	4620	Czechia_EBA_CordedWare.AG
I6531	TRM006	12.5271	22.6652	2	12.5271	1	0	0	0	0	4113	Poland_ChopiceVeseleCulture.AG	4644	Czechia_EBA_CordedWare.AG
I6531	VLI007	19.077	40.6911	3	32.5239	2	19.077	1	0	0	4113	Poland_ChopiceVeseleCulture.AG	4739	Czechia_EBA_CordedWare.AG
I6531	VLI029	8.1605	8.1605	1	0	0	0	0	0	0	4113	Poland_ChopiceVeseleCulture.AG	4150	Czechia_BellBeaker.AG
I6531	VLI067	9.383	9.383	1	0	0	0	0	0	0	4113	Poland_ChopiceVeseleCulture.AG	4718	Czechia_EBA_CordedWare.AG
I6531	VLI071	15.2701	15.2701	1	15.2701	1	0	0	0	0	4113	Poland_ChopiceVeseleCulture.AG	4715	Czechia_EBA_CordedWare.AG
I6531	VLI092	12.1409	21.6757	2	12.1409	1	0	0	0	0	4113	Poland_ChopiceVeseleCulture.AG	4719	Czechia_EBA_CordedWare.AG
I6531	N44	11.1483	29.7429	3	0	0	0	0	0	0	4113	Poland_ChopiceVeseleCulture.AG	4400	Poland_CordedWare_3.SG
I6531	N45	9.232	17.605	2	0	0	0	0	0	0	4113	Poland_ChopiceVeseleCulture.AG	4375	Poland_CordedWare_3.SG
I6531	N49	10.2611	29.4934	3	0	0	0	0	0	0	4113	Poland_ChopiceVeseleCulture.AG	4375	Poland_CordedWare_1.SG
I6531	MX188	9.348	9.348	1	0	0	0	0	0	0	4113	Poland_ChopiceVeseleCulture.AG	4399	Switzerland_EBA_2.AG
I6531	MX198	15.2249	15.2249	1	15.2249	1	0	0	0	0	4113	Poland_ChopiceVeseleCulture.AG	4509	Switzerland_EBA_2.AG
I6531	pcw070	10.1141	10.1141	1	0	0	0	0	0	0	4113	Poland_ChopiceVeseleCulture.AG	4321	Poland_Southeast_CordedWare.SG
I6531	pcw211	8.154	8.154	1	0	0	0	0	0	0	4113	Poland_ChopiceVeseleCulture.AG	4300	Poland_Southeast_CordedWare.SG
I6531	ber1	12.1487	21.3418	2	12.1487	1	0	0	0	0	4113	Poland_ChopiceVeseleCulture.AG	4483	Sweden_BAC.SG
I6531	poz81	15.0805	63.0091	5	42.2699	3	0	0	0	0	4113	Poland_ChopiceVeseleCulture.AG	4702	Poland_CordedWare.SG
I6531	RISE1163	8.5083	8.5083	1	0	0	0	0	0	0	4113	Poland_ChopiceVeseleCulture.AG	4736	Poland_Koszyce_GlobularAmphora.SG
I6531	RISE1172	8.2814	8.2814	1	0	0	0	0	0	0	4113	Poland_ChopiceVeseleCulture.AG	4664	Poland_Koszyce_GlobularAmphora_mother.RISE1163.mother.RISE1173.SG
I6531	RISE1173	8.4106	8.4106	1	0	0	0	0	0	0	4113	Poland_ChopiceVeseleCulture.AG	4635	Poland_Koszyce_GlobularAmphora_brother.RISE1169.brother.RISE1168.brother.RISE1163.SG
I6531	RISE1241	11.2739	20.8801	2	0	0	0	0	0	0	4113	Poland_ChopiceVeseleCulture.AG	4773	Poland_Sandomierz_GlobularAmphora.SG
I6531	RISE1247	8.93871	8.93871	1	0	0	0	0	0	0	4113	Poland_ChopiceVeseleCulture.AG	4725	Poland_Ksiaznice_GlobularAmphora_mother.or.daughter.RISE1248.SG
I6531	RISE1248	8.8091	8.8091	1	0	0	0	0	0	0	4113	Poland_ChopiceVeseleCulture.AG	4725	Poland_Ksiaznice_GlobularAmphora.SG
I6531	GBVPK	9.4178	9.4178	1	0	0	0	0	0	0	4113	Poland_ChopiceVeseleCulture.AG	4336	France_LaClape_LN_EMBA_BellBeakerPossible.SG
I6531	RISE94	8.2848	8.2848	1	0	0	0	0	0	0	4113	Poland_ChopiceVeseleCulture.AG	4487	Sweden_BattleAxe.SG
I6531	I13028	8.8843	8.8843	1	0	0	0	0	0	0	4113	Poland_ChopiceVeseleCulture.AG	4250	Netherlands_LNB_BellBeaker.AG
I6531	I20997	9.4083	9.4083	1	0	0	0	0	0	0	4113	Poland_ChopiceVeseleCulture.AG	4075	England_C_EBA.AG
I6531	NEO51	8.25369	8.25369	1	0	0	0	0	0	0	4113	Poland_ChopiceVeseleCulture.AG	4364	Sweden_MN_BAC.SG
I6531	I2443	10.8974	10.8974	1	0	0	0	0	0	0	4113	Poland_ChopiceVeseleCulture.AG	4091	England_BellBeaker.AG
I6531	FRA201	8.6684	8.6684	1	0	0	0	0	0	0	4113	Poland_ChopiceVeseleCulture.AG	4322	Sweden_Fralsegarden_Steppe1.SG
I6531	FRA202	14.125	22.5588	2	14.125	1	0	0	0	0	4113	Poland_ChopiceVeseleCulture.AG	4348	Sweden_Fralsegarden_Steppe1.SG
I6531	NAS003	10.0105	19.9518	2	0	0	0	0	0	0	4113	Poland_ChopiceVeseleCulture.AG	4022	Sweden_Nastegarden_Steppe2.SG
I6579	I0104	9.41931	9.41931	1	0	0	0	0	0	0	4155	Poland_EBA.AG	4358	Germany_CordedWare.AG
I6579	I2450	10.4513	10.4513	1	0	0	0	0	0	0	4155	Poland_EBA.AG	4248	England_BellBeaker.AG
I6579	I4074	8.3601	8.3601	1	0	0	0	0	0	0	4155	Poland_EBA.AG	4030	Netherlands_LNB_BellBeaker.AG
I6579	I6696	8.44491	8.44491	1	0	0	0	0	0	0	4155	Poland_EBA.AG	4575	Czechia_EBA_CordedWare.SG
I6579	I7195	9.0808	9.0808	1	0	0	0	0	0	0	4155	Poland_EBA.AG	4250	Czechia_EBA.AG
I6579	I7209	9.4747	9.4747	1	0	0	0	0	0	0	4155	Poland_EBA.AG	4269	Czechia_EBA_CordedWare.AG
I6579	I7211	8.1378	8.1378	1	0	0	0	0	0	0	4155	Poland_EBA.AG	4183	Czechia_BellBeaker.AG
I6579	I7276	10.6914	10.6914	1	0	0	0	0	0	0	4155	Poland_EBA.AG	4200	Czechia_BA_BellBeaker.AG
I6579	I7280	11.9233	11.9233	1	0	0	0	0	0	0	4155	Poland_EBA.AG	4200	Czechia_EBA_CordedWare.AG
I6579	I0112	13.1144	13.1144	1	13.1144	1	0	0	0	0	4155	Poland_EBA.AG	4224	Germany_BellBeaker.AG
I6579	HUGO_168	13.9256	13.9256	1	13.9256	1	0	0	0	0	4155	Poland_EBA.AG	4167	Germany_Lech_BellBeaker_possible.contam.AG
I6579	OHR002	9.8546	9.8546	1	0	0	0	0	0	0	4155	Poland_EBA.AG	4477	Czechia_EBA_CordedWare.AG
I6579	ROU001	13.5217	22.9095	2	13.5217	1	0	0	0	0	4155	Poland_EBA.AG	4000	Czechia_EBA_Unetice.AG
I6579	ROU007	9.5055	9.5055	1	0	0	0	0	0	0	4155	Poland_EBA.AG	4000	Czechia_EBA_Unetice.AG
I6579	TRM003	11.5411	11.5411	1	0	0	0	0	0	0	4155	Poland_EBA.AG	4620	Czechia_EBA_CordedWare.AG
I6579	TRM006	11.5411	11.5411	1	0	0	0	0	0	0	4155	Poland_EBA.AG	4644	Czechia_EBA_CordedWare.AG
I6579	VLI007	15.3518	23.7318	2	15.3518	1	0	0	0	0	4155	Poland_EBA.AG	4739	Czechia_EBA_CordedWare.AG
I6579	VLI010	12.4088	12.4088	1	12.4088	1	0	0	0	0	4155	Poland_EBA.AG	4483	Czechia_EBA_CordedWare.AG
I6579	VLI017	8.1617	8.1617	1	0	0	0	0	0	0	4155	Poland_EBA.AG	4336	Czechia_EBA_CordedWare.AG
I6579	VLI029	9.8793	9.8793	1	0	0	0	0	0	0	4155	Poland_EBA.AG	4150	Czechia_BellBeaker.AG
I6579	VLI061	9.4655	9.4655	1	0	0	0	0	0	0	4155	Poland_EBA.AG	4000	Czechia_EBA_Unetice.AG
I6579	VLI067	8.38299	8.38299	1	0	0	0	0	0	0	4155	Poland_EBA.AG	4718	Czechia_EBA_CordedWare.AG
I6579	VLI076	10.6781	10.6781	1	0	0	0	0	0	0	4155	Poland_EBA.AG	4906	Czechia_EBA_CordedWare.AG
I6579	N45	13.7563	22.0824	2	13.7563	1	0	0	0	0	4155	Poland_EBA.AG	4375	Poland_CordedWare_3.SG
I6579	N47	29.2958	29.2958	1	29.2958	1	29.2958	1	29.2958	1	4155	Poland_EBA.AG	4375	Poland_CordedWare_1.SG
[truncated: 13,075 more rows]
