# Supplementary material for: Long-distance kinship in megalithic Europe
Source: Research Square preprint supplement (doi:10.21203/rs.3.rs-6464608/v1), 2025-05-07
Supplement: Supplementary file 2 [file f5437ff474046ecd39a81365.docx]

**Supplementary Information for:**

**Long-distance kinship in megalithic Europe**

da Silva et al.

*Corresponding author contact information: [b.krause-kyora@ikmb.uni-kiel.de](mailto:b.krause-kyora@ikmb.uni-kiel.de)

**This PDF file includes:**
 Supplementary Notes 1-2
 Supplementary Figures 1-17

**Other supplementary information for this manuscript include the following:**
 Supplementary Tables 1-4

**Supplementary Note 1: Archaeological context information**

Here we present archaeological information on the newly reported sites of Sorsum and Züschen. Similar information on the sites of Altendorf, Niedertiefenbach, Rimbeck and Warburg can be found in the original articles in which they were first published (Immel et al. 2021; da Silva et al. 2025).

Immel, A. *et al.* Genome-wide study of a Neolithic Wartberg grave community reveals distinct HLA variation and hunter-gatherer ancestry. *Commun. Biol.* **4**, 1–10 (2021).

da Silva, N. A. *et al.* Admixture as a source for HLA variation in Neolithic European farming communities. *Genome Biol.* **26**, 43 (2025).

**Sorsum** (district Hildesheim, Lower Saxony, Germany)

The collective burial site is associated with the Western Funnel Beaker Group (TRB-West) and dates ca. 3350–3100 BCE (Brozio & Rinne 2022). Discovered in 1955 during quarrying activities on the Halsberg, the site was excavated between 1956 and 1960 by archaeologist Martin Claus (Claus 1983/84). The construction is sunk into the ground, the flat beamed ceiling and the dimensions link the grave to Hessian and Westphalian gallery graves. The lateral access refers to the megalithic passage graves of the TRB-North and -West groups and the use of dry-stone walls and wood is known from the wood and dry-stone chamber burials of the Walternienburg-Bernburg group to the east.

The southwest-northeast oriented chamber measures about 15.5 meters in length, 2.1 to 2.4 meters in width and 1.2 meters in depth, partially carved into the limestone bedrock. Notably, the northern long side of the chamber utilizes the natural rock face, incorporating a carefully hewn and stepped entrance. The chamber's floor was paved with limestone slabs, and niches carved into the northern wall suggest the presence of wooden beams, possibly supporting a now-lost wooden ceiling.

Excavations revealed the disarticulated remains of approximately 105 to 150 individuals, with some skulls arranged in stacked formations. Grave goods included fragmented pottery, predominantly Tiefstichkeramik (deep incision pottery) of the TRB-West group and one sherd belonging to the Walternienburg group, along with artifacts such as a stone adze, transverse arrowhead, bone arrowheads, flint tools and a spindle whorl. The site's strategic location near the Hildesheimer Wald, a low mountain range separating the Leine and Innerste valleys, suggests its significance during the Neolithic period, potentially serving as a hub for cultural interactions and trade within the TRB-West cultural sphere.

Brozio, J. P. & Rinne, C. Tempel der Toten. Die Megalithgräber von Sorsum und Wangels. in *Die Erfindung der Götter* (ed. Klimscha, F.) 308–315 (Hannover, 2022).

Claus, M. *Das neolithische Steinkammergrab auf dem Halsberg bei Sorsum, Stadt Hildesheim*. vol. 34/35 (1983).

**Züschen I (**Fritzlar, Schwalm-Eder district, Hesse, Germany)

Four megalithic gallery graves near Züschen are associated with the WBC group, dating ca. 3500 to 3150 BCE (Schierhold 2012). The most prominent grave is Züschen I, which is sometimes also referred to as Lohne-Züschen, as it was originally published under the municipality of Züschen but belongs to Lohne. The subterranean rectangular chamber measures 20 meters in length and 3.5 meters in width and is constructed from sandstone slabs not native to the immediate vicinity. A distinctive feature is the "porthole," a circular opening in the end slab separating the main chamber from a 2.5-meter-long antechamber.

Excavations (1894, 1939 and 1949) have uncovered human skeletal remains of 27 individuals, ceramic fragments of the WBC type, stone and bone tools and notable engravings depicting cattle and possible carts, suggesting early representations of wheeled vehicles. These engravings provide valuable insights into the symbolic and ritual practices of Late Neolithic societies. The site was first excavated in the late 19th century, with subsequent investigations enhancing our understanding of its structure and significance.

Schierhold, K. *Studien zur hessisch-westfälischen Megalithik: Forschungsstand und -perspektiven im europäischen Kontext*. vol. 6 (Leidorf, Rahden-Westfalen, 2012).

**Supplementary Note 2: Population genetic analyses**

Our dataset, comprising 203 individuals from a TRB-West (Sorsum) site and five WBC sites (Table 1, Supplementary Table 1, Supplementary Note 1), was combined with a reference panel of ancient and present-day populations (AADR v62) (Mallick & Reich, 2023) for population genetic analyses. A PCA projecting ancient population onto modern West Eurasian variation shows both Sorsum and WBC individuals forming a cluster closer to the western hunter-gatherers (WHG) than to other Late Neolithic groups, including other TRB populations.

The genetic profile of both Sorsum and WBC, like that of other Late Neolithic populations preceding the arrival of steppe-related ancestry (Haak et al. 2015), consists of two primary ancestry components: one maximized in WHG and the other in Anatolian farmers (AF) (Supplementary Figures 1-2). qpAdm modelling estimates an average of 34% WHG ancestry in both Sorsum and WBC populations, although individual-level analyses reveal a broader range (22–56%) (Supplementary Table 2). As previously reported for WBC populations (Immel et al., 2021; Silva et al., 2025), this WHG ancestry is notably higher than in most other contemporaneous groups in the region (Supplementary Figure 3) and was likely introduced around 4500-3500 BCE (Supplementary Figure 4).

Although Sorsum is archaeologically linked to the TRB-West cultural horizon, genetically it does not show greater affinity to TRB-North or -East populations than to WBC-associated individuals (Supplementary Figure 5). Analysis of runs of homozygosity (ROH) reveals a small number of long ROH segments in both Sorsum and WBC (Supplementary Figure 6). Only three individuals show long ROH (20–300 cM) and the total ROH per individual remains below 50 cM, suggesting minimal close-kin mating. ROH-based estimates of effective population size (Ne) indicate values comparable to those of other contemporaneous megalithic groups (Supplementary Figure 7).

The WBC populations show more diversity in mitochondrial haplogroup diversity than in Y chromosome haplogroup diversity (Supplementary Figure 8), indicating a scenario of sex-biased admixture as previously suggested (da Silva et al, 2025). The same pattern appears in Sorsum (Supplementary Figure 8). To formally test for sex-biased admixture, including the newly generated data, we examined the ratio of WHG ancestry on X chromosomes relative to autosomes (RX/A; see Methods in the main text). Despite individual variability, the overall trend shows a significant excess of WHG ancestry in autosomes compared to the X chromosome, as most individuals exhibit negative log₂(RX/A) values (Supplementary Figures 9-10). These results align with the observed imbalance of parental haplogroups for both Sorsum and WBC (Supplementary Figure 8) and suggest that men with high WHG ancestry more frequently interbred with women of predominantly AF ancestry, whereas the reverse—men with high AF ancestry mating with WHG women—occurred less frequently.

Taken together, the genetic evidence supports the interpretation that Sorsum, despite its archaeological classification within the TRB-West cultural sphere, may be better understood as part of the broader WBC genetic continuum rather than as a distinct TRB-related population.

Mallick, S. *et al.* The Allen Ancient DNA Resource (AADR) a curated compendium of ancient human genomes. *Sci. Data* **11**, 182 (2024).

Haak, W. *et al.* Massive migration from the steppe was a source for Indo-European languages in Europe. *Nature* **522**, 207–211 (2015).

Immel, A. *et al.* Genome-wide study of a Neolithic Wartberg grave community reveals distinct HLA variation and hunter-gatherer ancestry. *Commun. Biol.* **4**, 1–10 (2021).

da Silva, N. A. *et al.* Admixture as a source for HLA variation in Neolithic European farming communities. *Genome Biol.* **26**, 43 (2025).

**Supplementary Figures**


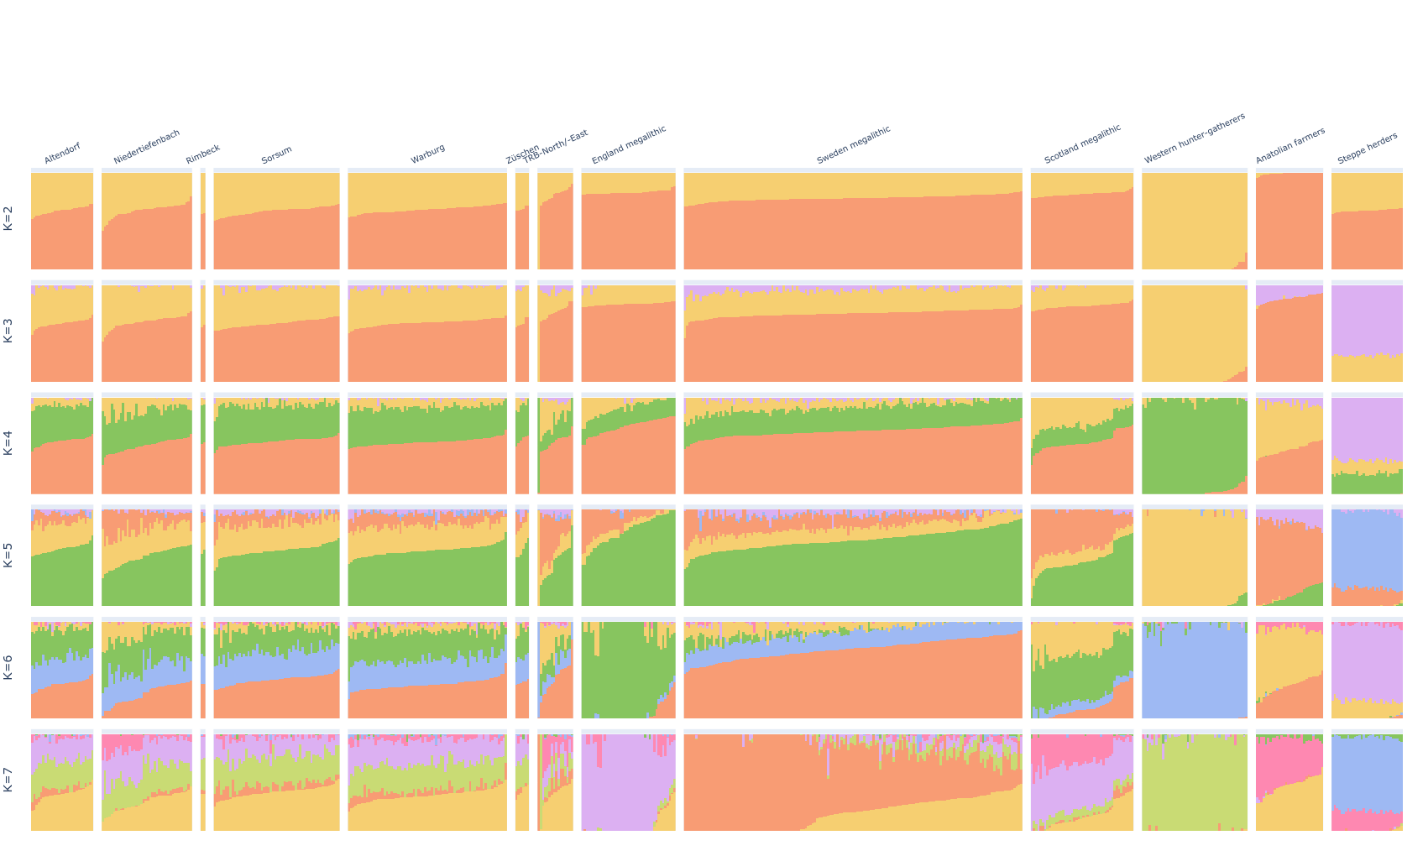


**Supplementary Figure 1.** Unsupervised admixture results for K = 2–7 ancestral components based on a dataset of 3,291 ancient and present-day individuals. Only a representative subset of individuals is displayed.


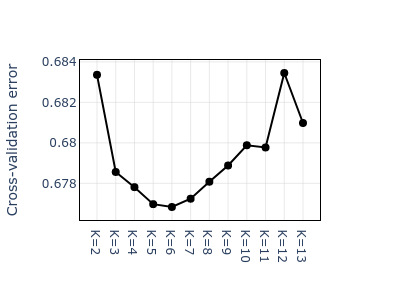


**Supplementary Figure 2.** Cross-validation error estimates from the unsupervised admixture analysis. The error is plotted for each tested value of K (the number of ancestral components). Lower cross-validation values indicate a better model fit to the genetic data.


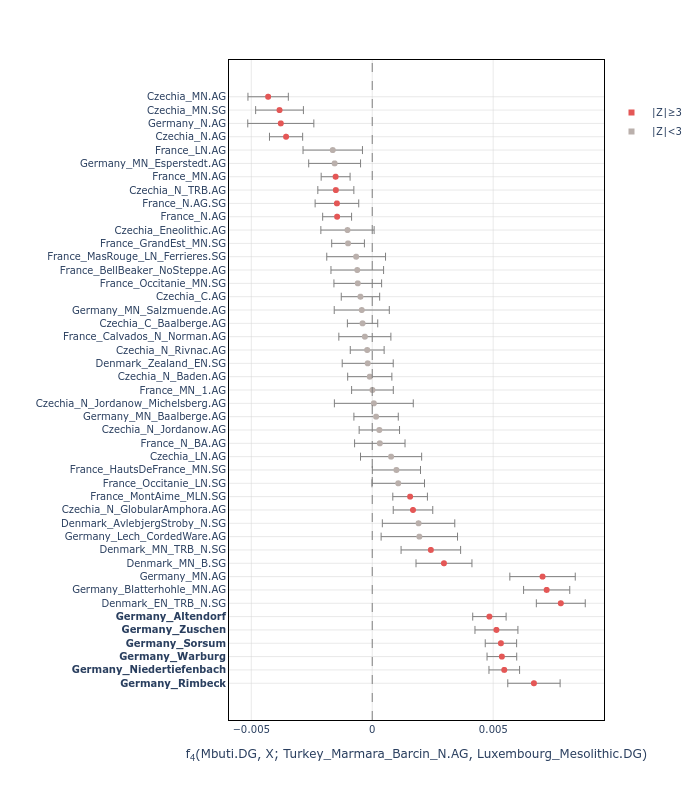


**Supplementary Figure 3.** *f₄*-statistics illustrating the genetic affinities of the six populations analysed in this study (in bold), alongside other contemporaneous groups in the region, relative to either Anatolian farmers or western hunter-gatherers. The *f₄*-statistic is computed as *f₄*(outgroup, X; Anatolian farmer proxy, western hunter-gatherer proxy), with X representing the populations listed on the Y-axis. Positive values on the X-axis indicate a stronger genetic affinity to western hunter-gatherers, while negative values suggest a closer affinity to Anatolian farmers. Significant shifts in the *f₄*-statistics (i.e., |Z-score| ≥ 3) are shown in red.


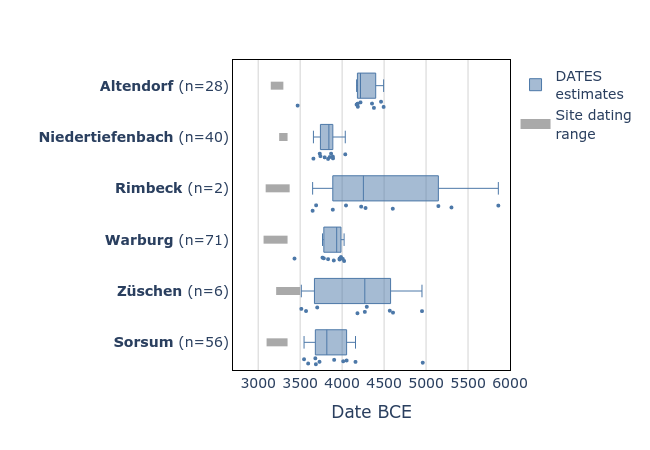


**Supplementary Figure 4.** Estimated admixture dates for the six communities analysed in this study. Dates were inferred using the software DATES, employing multiple proxy populations for western hunter-gatherers and early farmers under a model of single-pulse admixture. Boxplots summarise the distribution of admixture estimates across all tested models, while individual points represent the results of each model. Grey bars indicate the radiocarbon dating ranges for each archaeological site. Sample sizes for each population are shown in parentheses.


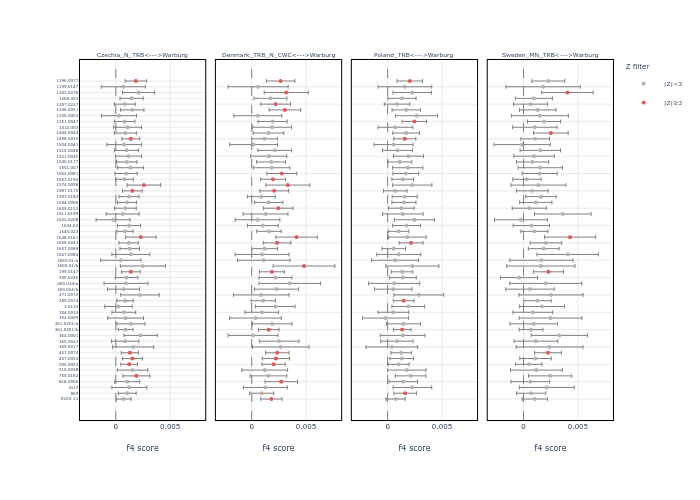


**Supplementary Figure 5.** *f₄*-statistics illustrating the genetic affinities of individuals from Sorsum (TRB-West) relative to WBC (with Warburg as a proxy) and other published TRB-North/-East populations. The X-axis shows the *f₄*-values, where positive values indicate a stronger genetic affinity to WBC, and negative values suggest a closer affinity to the tested TRB populations. Significant shifts in the *f₄*-statistics (i.e., |Z-score| ≥ 3) are highlighted in red.


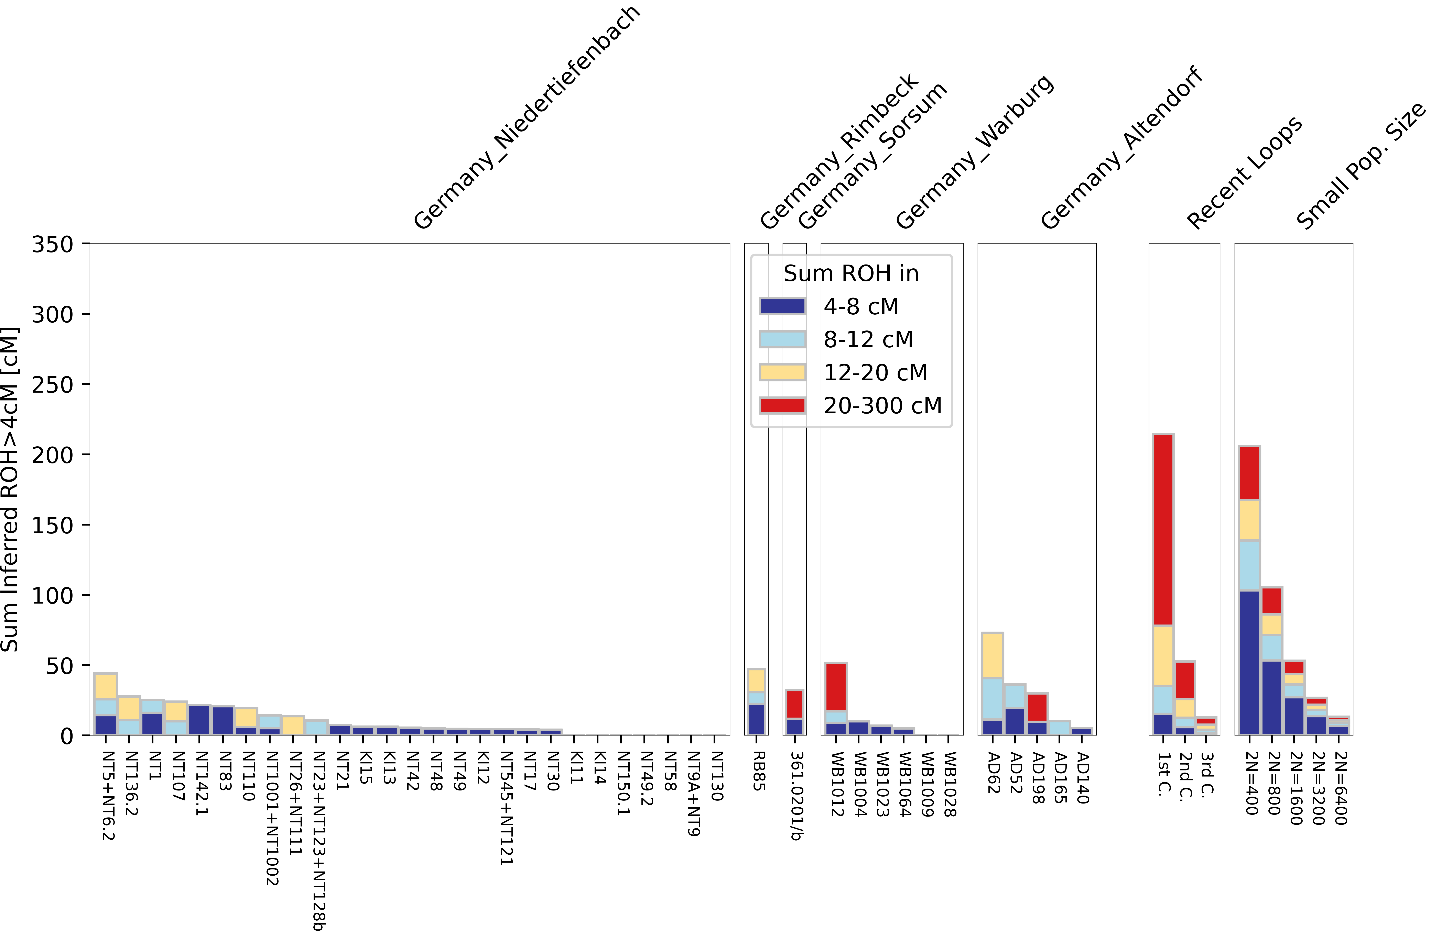


**Supplementary Figure 6**. Estimates of runs of homozygosity (ROH) in the populations analysed in this study. Stacked bar plots represent the total length of ROH per individual, grouped into different ROH length categories. The last two panels display expected ROH distributions for offspring of first-, second- and third-degree cousin unions, as well as for populations with varying effective population sizes (2N). Only individuals with more than 400,000 covered SNPs were included in the analysis.


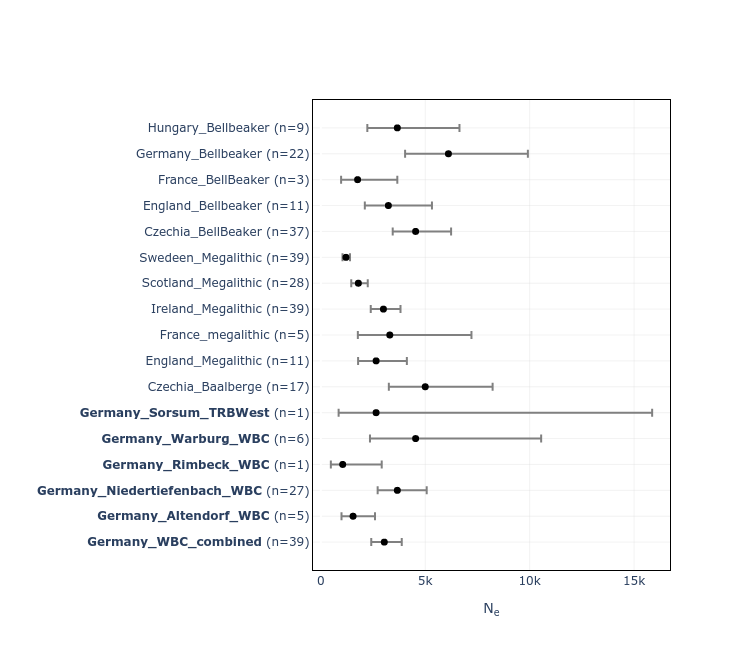


**Supplementary Figure 7**. Estimated effective population sizes (Ne) for the populations analysed in this study, alongside a subset of contemporaneous published groups. Ne values were inferred using maximum likelihood fitting based on the distribution of runs of homozygosity (ROH). Error bars indicate the 95% confidence intervals of the estimates.


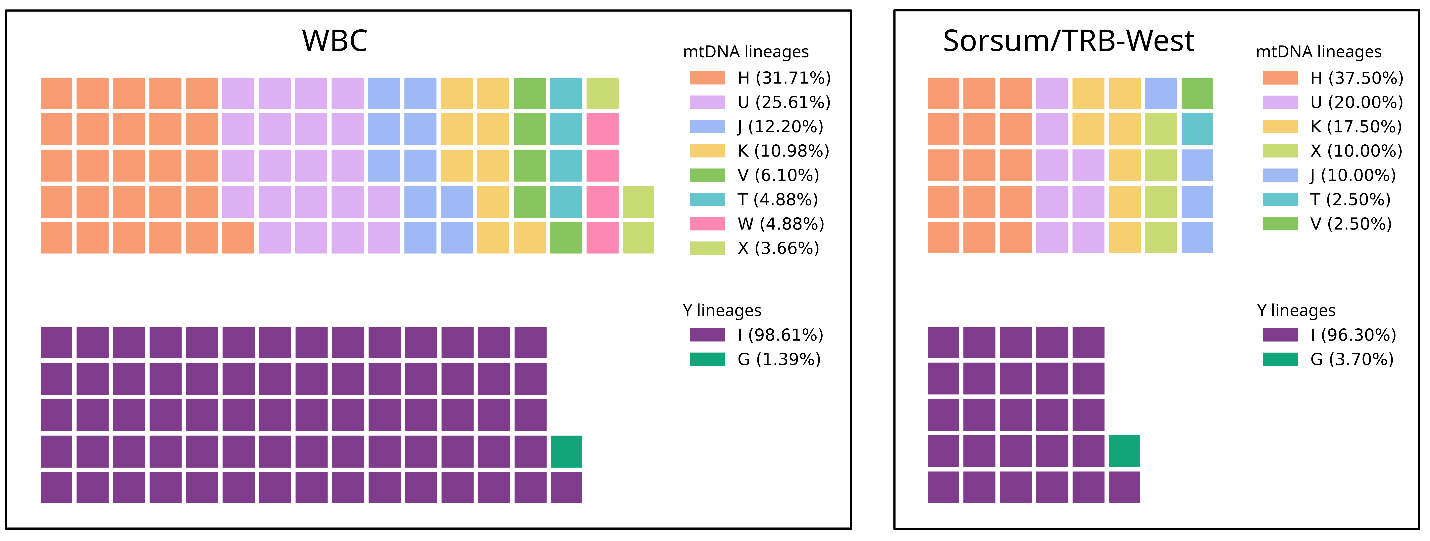


**Supplementary Figure 8.** Waffle plot illustrating the distribution of uniparental macro-lineages (mtDNA and Y chromosome) in the Sorsum and WBC populations analysed in this study. Each square represents an individual, with the colour of the square corresponding to the individual's haplogroup, as indicated in the legend.


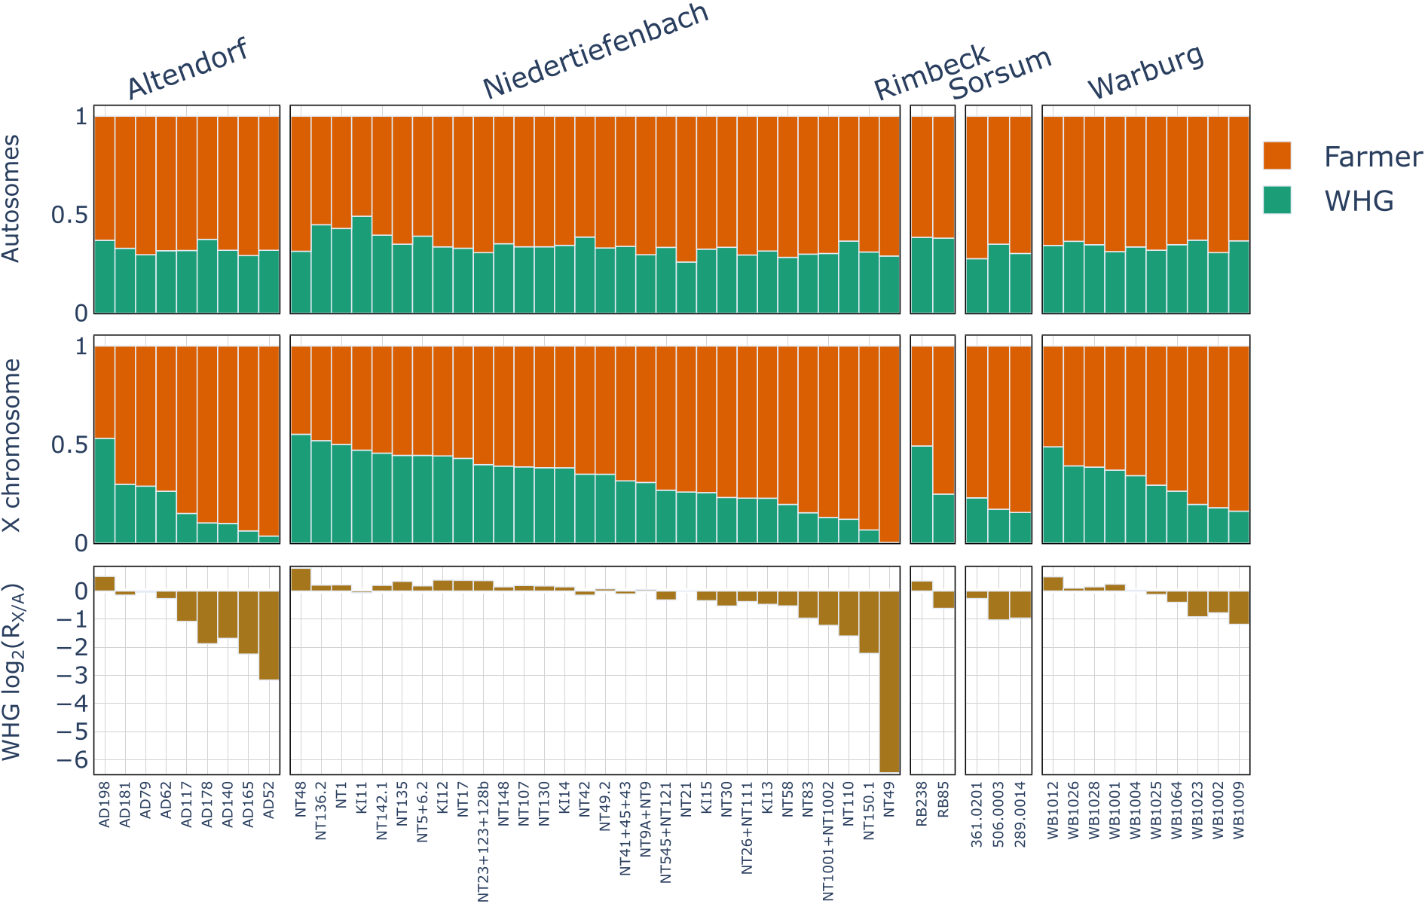

**Supplementary Figure 9**. Results of the sex-biased admixture analysis for the six populations examined in this study. The top two panels show supervised ancestry clustering results based on the autosomes and the X chromosome, respectively. The bottom panel displays the logarithm of the ratio of western hunter-gatherer ancestry on the X chromosome relative to the autosomes (log₂(RX/A)). Values above zero suggest a female-biased contribution, while values below zero indicate a male-biased signal.


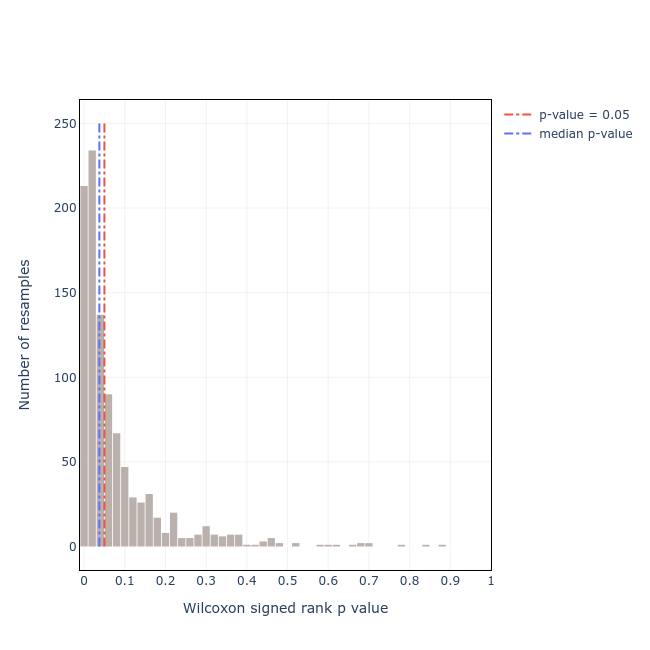

**Supplementary Figure 10.**  Histogram of p-values from Wilcoxon signed-rank tests comparing western hunter-gatherer ancestry proportions on the X chromosome to 1000 bootstrapped autosomal ancestry distributions for the six populations analysed here.


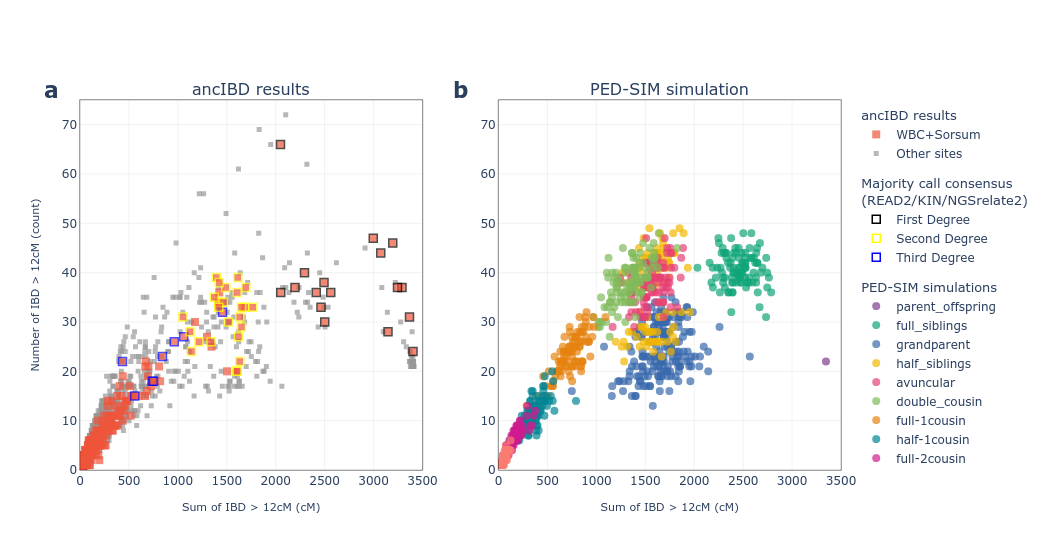

**Supplementary Figure 11.** Results of identity-by-descent (IBD) analysis using ancIBD. **a**,Inferred IBD sharing among high-coverage imputed genomes from Central/Northern Europe dating to the Late Neolithic (4000–2000 BCE), including individuals from Sorsum and WBC (highlighted in red). Pairs involving other published groups are shown in grey for context. Borders of the markers representing Sorsum and WBC pairs are coloured according to their inferred kinship degree based on the majority-rule consensus approach (see Methods). **b**, Simulated IBD sharing across a range of kinship scenarios. In both panels, the Y-axis indicates the number of shared IBD segments >12 cM, and the X-axis shows the sum of the length of IBD segments exceeding 12 cM.


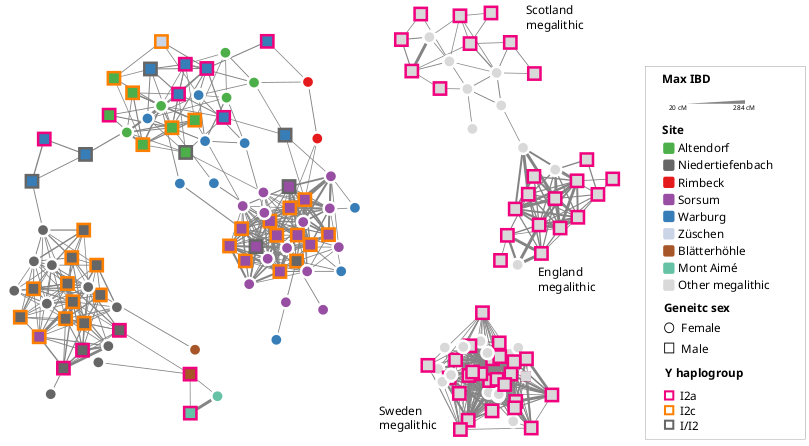


**Supplementary Figure 12.** Identity-by-descent (IBD) network showing genetic connections between individuals analysed in this study, alongside other megalithic groups. Each node represents an individual, with edge widths denoting the maximum shared IBD segment length (in centimorgans, cM). We display only pair of individuals related up to approximately the sixth degree (i.e., those sharing at least three IBD segments > 12 cM). Male individuals are highlighted with coloured borders representing their Y chromosome haplogroups.


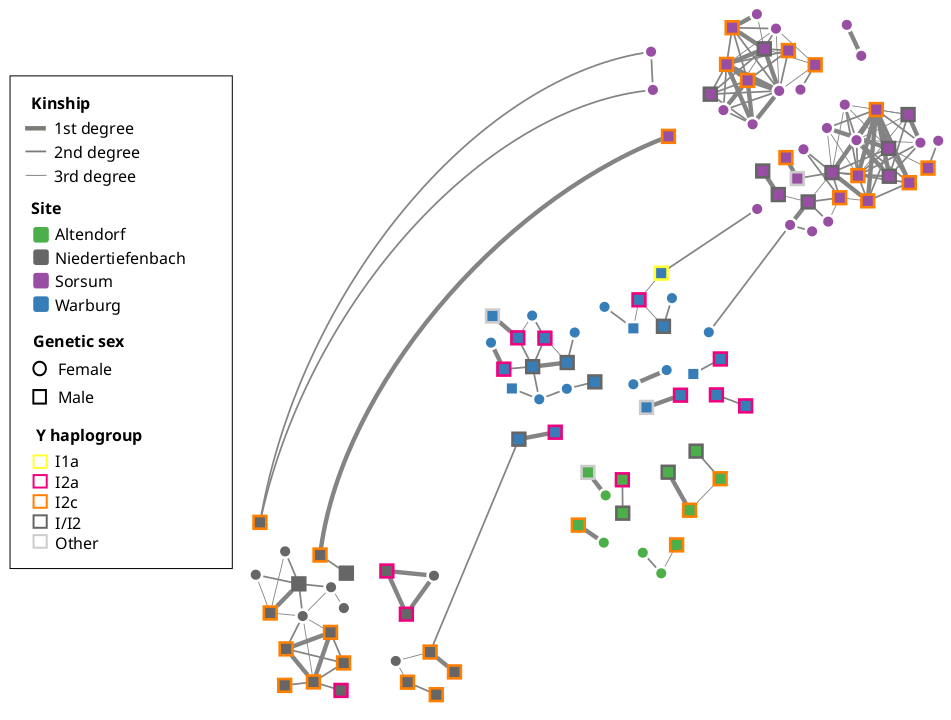


**Supplementary Figure 13.** Kinship network of individuals identified as first-, -second and third-degree relatives. Each node represents an individual, and edge widths denote the degree of genetic relationships. Clusters are positioned to reflect the geographic locations of their respective sites, illustrating the spatial distribution of the kinship ties. Male individuals are depicted with coloured borders indicating their Y chromosome haplogroups.


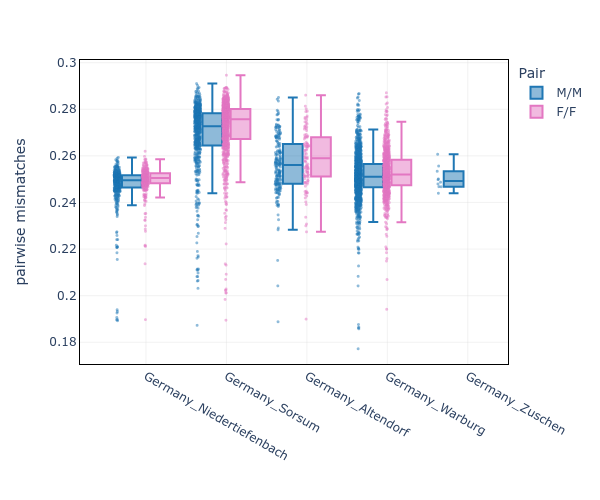


**Supplementary Figure 14.** Pairwise genetic mismatches among male–male and female–female pairs within five of the six populations analysed (Rimbeck is excluded from the analysis due to low sample size – n=2). Differences in the distributions between sexes reflect disparities in genetic diversity, which may suggest sex-biased mobility patterns. Conversely, similar distributions for male and female pairs indicate comparable levels of genetic diversity, consistent with equal mobility for both sexes.


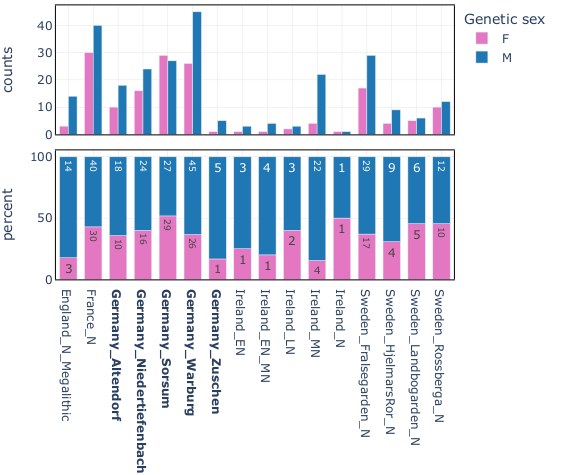


**Supplementary Figure 15.** Distribution of genetic sex across five sites analysed in this study (highlighted in bold), along with other selected contemporaneous published groups. Upper panel shows the counts of males and females for each population. Lower panel shows the percentage distribution of genetic sex, with the counts of males and females displayed inside the stacked bars.


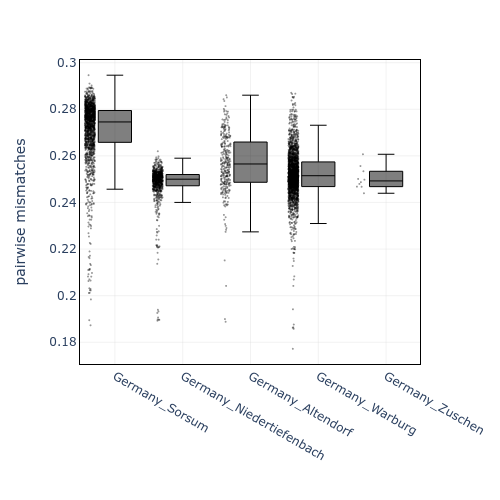


**Supplementary Figure 16.** Pairwise genetic mismatches in five populations analysed in this study. Rimbeck is excluded from this analysis due to low sample size (n=2).


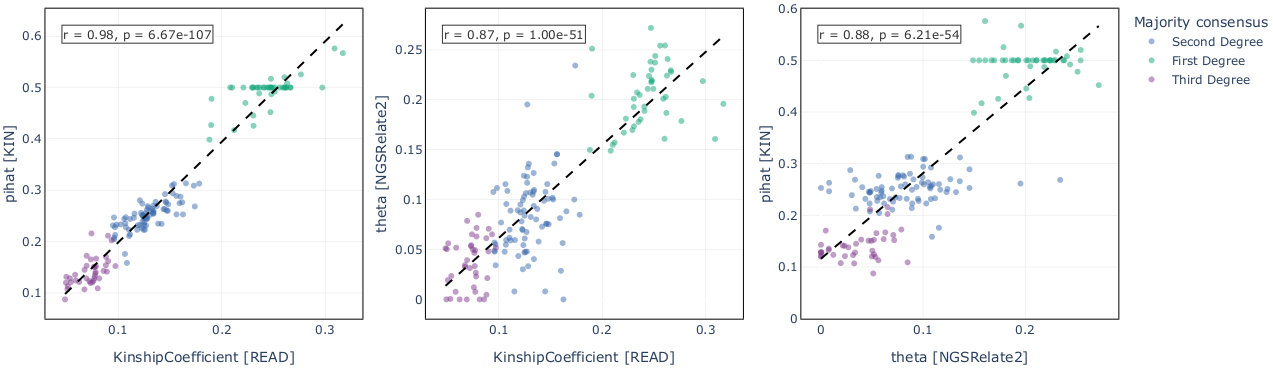


**Supplementary Figure 17.** Comparison of kinship estimates obtained using three different methods — KIN, READv2, and NGSrelate2 — as part of the majority-call approach for identifying first-, second- and third-degree relatives. Each point represents a pairwise comparison, with the X- and Y-axis showing the respective statistic estimates from two of the methods in each panel. Markers are coloured according to the degree of relatedness assigned by the majority-call consensus. Dotted lines represent linear regression fits, with Pearson correlation coefficients and associated p-values provided to assess the agreement between methods.
